# Supplementary material
Source: bioRxiv or medRxiv preprint supplement (https://www.biorxiv.org/highwire/filestream/86260/field_highwire_adjunct_files/1/280792-2.pdf)

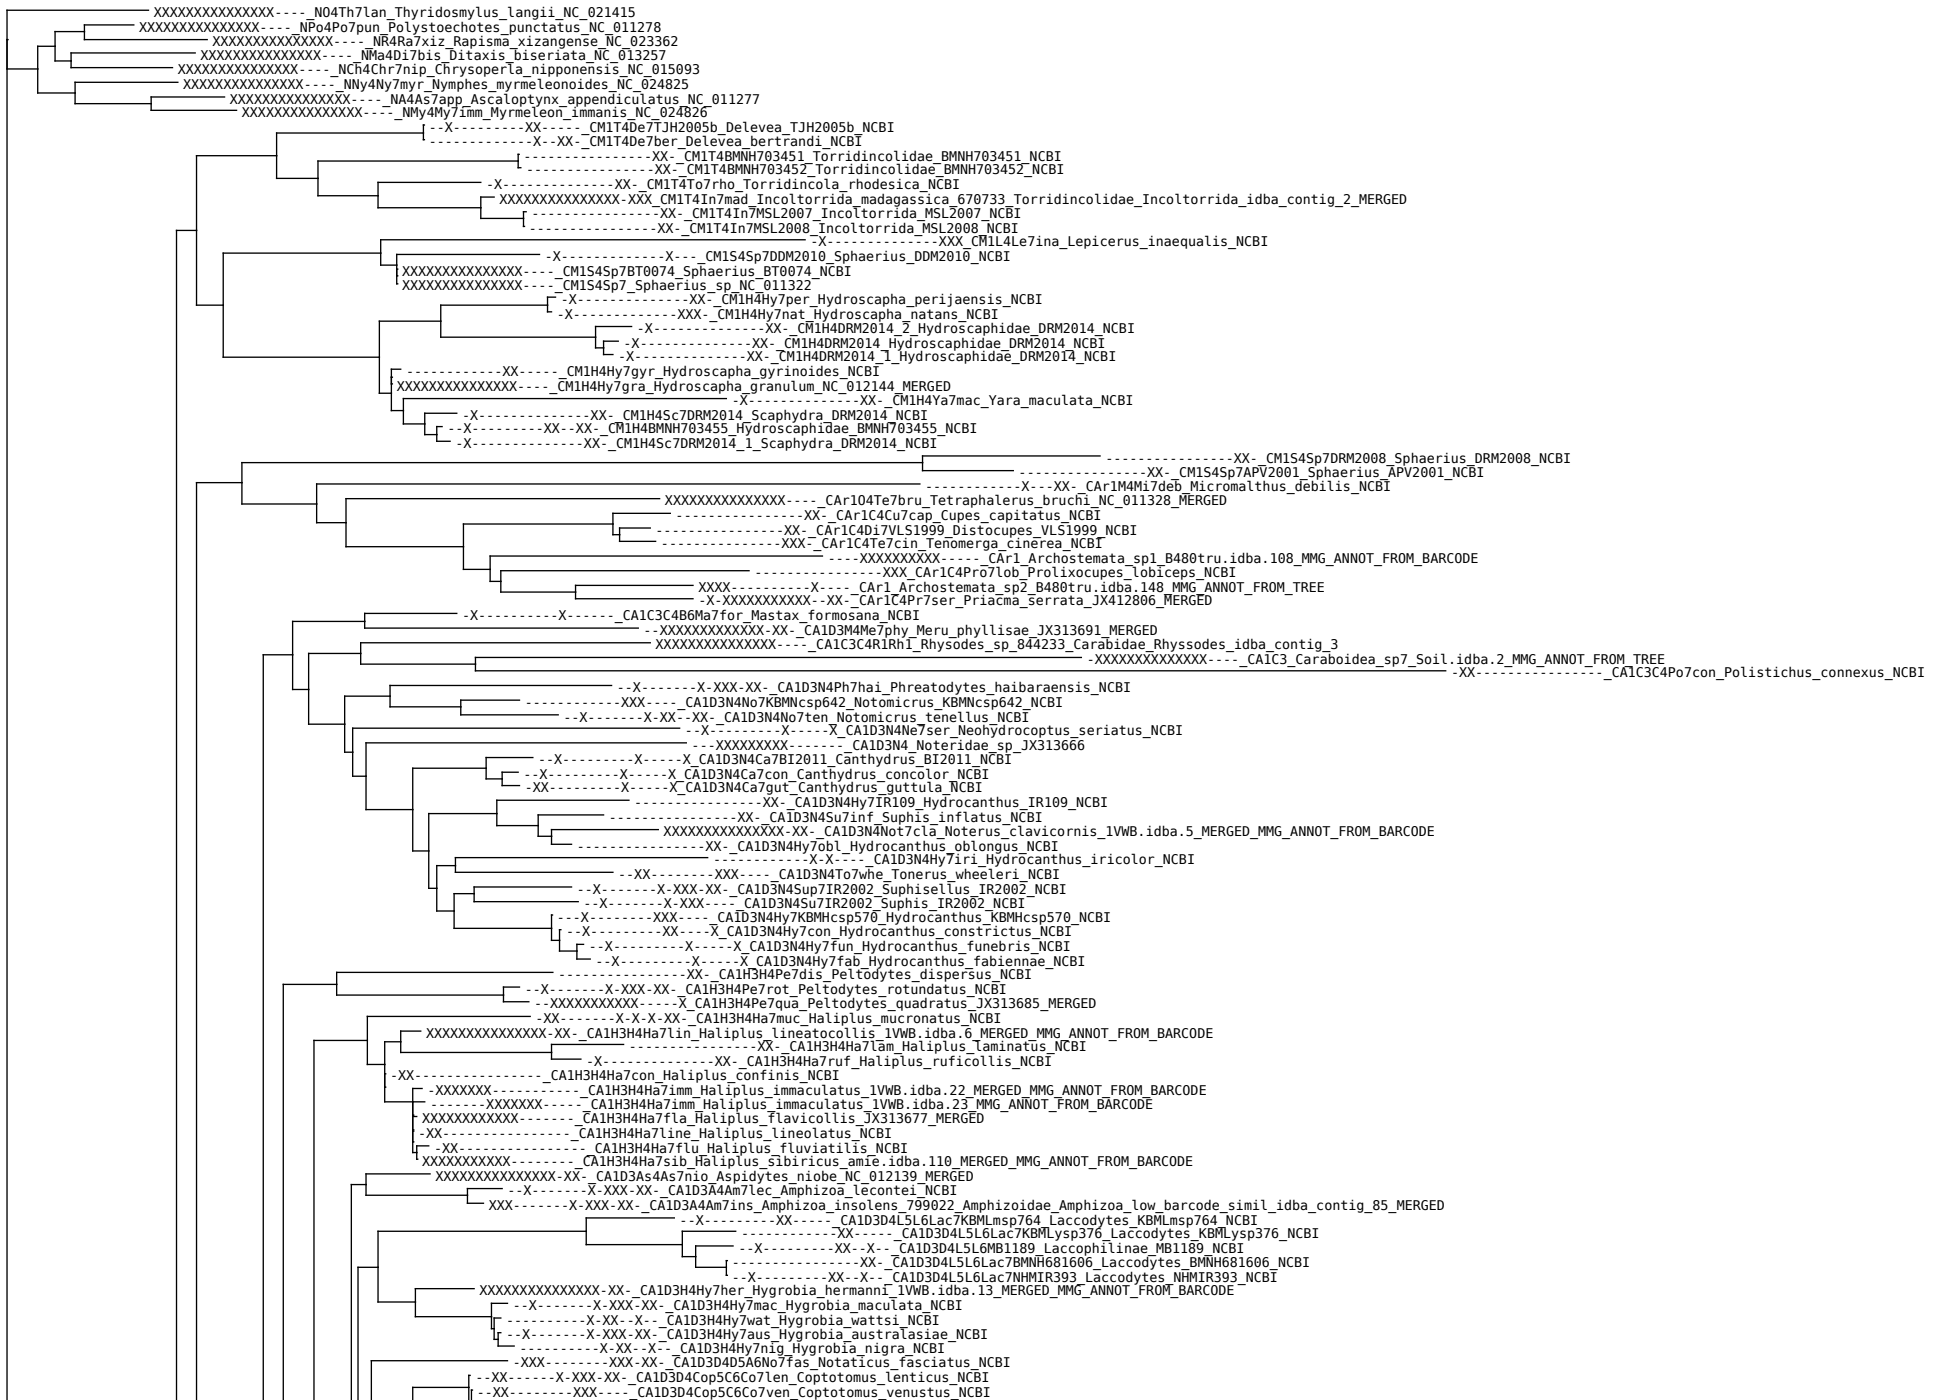



-X-----XX----CA1D3D4A5A6Ag7IR2001 Agabus IR2001 NCBI  
-X-----XX-X- CA1D3D4A5A6Ag7bas Agabus basalis NCBI  
-X-----XX----CA1D3D4A5A6Ag7cep Agabus cephalotes NCBI  
-X-----XX----CA1D3D4A5A6Ag7gla Agabus glacialis NCBI  
-X-----XX----CA1D3D4A5A6Ag7dil Agabus dilatatus NCBI  
-X-----XX----CA1D3D4A5A6Ag7fal Agabus faldemanni NCBI  
-X-----XX----CA1D3D4A5A6Ag7car Agabus caraboides NCBI  
-XX-----X-XX-X- CA1D3D4A5A6Ag7gut Agabus guttatus NCBI  
-X-----XX----CA1D3D4A5A6Ag7bin Agabus binotatus NCBI  
-X-----X-XXX-XX- CA1D3D4A5A6Ag7hey Agabus heydeni NCBI  
-X-----XX----CA1D3D4A5A6Ag7pic Agabus picotae NCBI  
-X-----XX----CA1D3D4A5A6Ag7lin Agabus lineatus NCBI  
XXXXXXXXXXXXX- CA1D3D4A5A6Ag7uli Agabus uliginosus amie.idba.68\_MERGED\_MMG\_ANNOT\_FROM\_BARCODE  
-X-----XX----CA1D3D4A5A6Ag7ung Agabus unguicularis NCBI  
-X-----XX----CA1D3D4A5A6Ag7sem Agabus semipunctatus NCBI  
-X-----XX----CA1D3D4A5A6Ag7bigu Agabus biguttatus NCBI  
-XX-----X-XX----CA1D3D4A5A6Ag7aff Agabus affinis NCBI  
-X-----XXX-X- CA1D3D4A5A6Ag7did Agabus didymus NCBI  
-X-----XX----CA1D3D4A5A6Ag7ram Agabus ramblae NCBI  
-X-----XX----CA1D3D4A5A6Ag7ruf Agabus rufulus NCBI  
-X-----XX-XX- CA1D3D4A5A6Ag7bru Agabus brunneus NCBI  
-X-----XX----CA1D3D4A5A6Ag7ant Agabus antennatus NCBI  
-XX-----XX-X- CA1D3D4A5A6Ag7und Agabus undulatus NCBI  
-XX-----XX----CA1D3D4A5A6Ag7ser Agabus serricornis NCBI  
-X-----XX-X- CA1D3D4A5A6Ag7pal Agabus pallidus NCBI  
-XX-----XX----CA1D3D4A5A6Ag7lab Agabus labiatus NCBI  
-X-----X-XX-X- CA1D3D4A5A6Pl7ob Platambus obsusatus NCBI  
-X-----XX----CA1D3D4A5A6Pl7sem Platambus semivittatus NCBI  
-X-----XX----CA1D3D4A5A6Pl7IRsp1 Platambus IRsp1 NCBI  
-XX-----X-XXX-XX- CA1D3D4A5A6Ag7dis Agabus disintegratus NCBI  
-X-----XX----CA1D3D4A5A6Pl7gla Platambus glabrellus NCBI  
-X-----XX----CA1D3D4A5A6Pl7scu Platambus sculpturellus NCBI  
-X-----XX----CA1D3D4A5A6Pl7sty Platambus stygius NCBI  
-X-----XX----CA1D3D4A5A6Ag7jap Agabus japonicus NCBI  
-XX-----XX-X- CA1D3D4A5A6Ag7fus Agabus fuscipennis NCBI  
-X-----XX----CA1D3D4A5A6Ag7con Agabus confinis NCBI  
-XX-----XX----CA1D3D4A5A6Ag7stu Agabus sturnii NCBI  
-X-----XX-X- CA1D3D4A5A6Ag7reg Agabus regimbarti NCBI  
-X-----XX----CA1D3D4A5A6Ag7hum Agabus hummeli NCBI  
-X-----X- CA1D3D4A5A6Ag7anth Agabus anthracinus NCBI  
-X-----XX----CA1D3D4A5A6Ag7amo Agabus amoenus NCBI  
-X-----XX-X- CA1D3D4A5A6Ag7ruw Agabus ruwenzoricus NCBI  
-X-----XX----CA1D3D4A5A6Ag7lut Agabus lutosus NCBI  
-X-----XX----CA1D3D4A5A6Ag7rag Agabus ragazzii NCBI  
-X-----XX----CA1D3D4A5A6Ag7ery Agabus erythropterus NCBI  
-X-----XX----CA1D3D4A5A6Ag7amb Agabus ambiguus NCBI  
-X-----XX----CA1D3D4A5A6Ag7mor Agabus morosus NCBI  
-X-----X- CA1D3D4A5A6Ag7str Agabus strabus NCBI  
-X-----XX----CA1D3D4A5A6Ag7IRsp2 Agabus IRsp2 NCBI  
-X-----X- CA1D3D4A5A6Ag7koo Agabus kootenai NCBI  
-XX-----XX----CA1D3D4A5A6Ag7elo Agabus elongatus NCBI  
-XX-----XX----CA1D3D4A5A6Ag7tho Agabus thomsoni NCBI  
-X-----XX----CA1D3D4A5A6Ag7IR2002 Agabus IR2002 NCBI  
-X-----XX----CA1D3D4A5A6Ag7aus Agabus austinii NCBI  
-X-----XX----CA1D3D4A5A6Ag7mat Agabus matsumotoi NCBI  
-XX-----XX----CA1D3D4A5A6Ag7arc Agabus arcticus NCBI  
-XX-----XX----CA1D3D4A5A6Ag7cly Agabus clypealis NCBI  
-X-----X- CA1D3D4A5A6Ag7inf Agabus infusatus NCBI  
-X-----XX----CA1D3D4A5A6Ag7set Agabus setulosus NCBI  
-XX-----XX-X- CA1D3D4A5A6Ag7cong Agabus congener NCBI  
-XX-----XX----CA1D3D4A5A6Ag7lap Agabus lapponicus NCBI  
-XXX-----X-XXX-XX- CA1D3D4C5C6Me7imb Meladema imbricata NCBI  
-X-----XX----CA1D3D4C5C6Me7lan Meladema lanio NCBI  
-XXX-----XXX-XX- CA1D3D4C5C6Me7cor Meladema coriacea NCBI  
-XXX-----X-XXX-XX- CA1D3D4C5C6Ho7pla Hoperius planatus NCBI  
-XXX-----XXX----CA1D3D4C5C6Ne7ang Neoscutopterus angustus NCBI  
-XXX-----X-XXXXX- CA1D3D4C5C6Ne7hor Neoscutopterus hornii NCBI  
-X-----XX-XX- CA1D3D4C5C6Co7sch Colymbetes schilcknechti NCBI  
-XXX-----XXXXX-X- CA1D3D4C5C6Co7pay Colymbetes paykulli NCBI  
-XXX-----XXXXX-X- CA1D3D4C5C6Co7str Colymbetes striatus NCBI  
-XX-----XX----CA1D3D4C5C6Rh7latu Rhantus latus NCBI  
XXXXXXXXXXXXX-X- CA1D3D4C5C6Co7fus Colymbetes fuscus 1VWB.idba.17\_MMG\_ANNOT\_FROM\_BARCODE  
-XX-----XX----CA1D3D4C5C6Rh7bou Rhantus bouvieri NCBI  
XXXXXXXXXXXXX- CA1D3D4C5C6Co7fus Colymbetes fuscus 1VWB.idba.16\_MERGED\_MMG\_ANNOT\_FROM\_BARCODE  
-XX-----X-XXXXX- CA1D3D4C5C6Rh7atr Rhantus atricolor NCBI  
-XX-----XXX-X- CA1D3D4C5C6Rh7cal Rhantus calidus NCBI  
-XXX-----XXX----CA1D3D4C5C6Rh7val Rhantus validus NCBI  
-XX-----X-XXX-X- CA1D3D4C5C6Rh7alu Rhantus alutaceus NCBI  
-X-----XX-X- CA1D3D4C5C6Rh7samo Rhantus samoae NCBI  
-XXX-----X-XX-X- CA1D3D4C5C6Rh7pse Rhantus pseudopacificus NCBI  
-XXX-----X-XXXXX- CA1D3D4C5C6Ca7upi Carabdytes upin NCBI  
-XXX-----X-XXXXX- CA1D3D4C5C6Rh7poe Rhantus poellerbauerae NCBI  
-XXX-----X-XXXXX- CA1D3D4C5C6Rh7mon Rhantus monteithi NCBI  
-XXX-----X-XXX-X- CA1D3D4C5C6Rh7nov Rhantus novaecaledoniae NCBI  
-X-----XX-X- CA1D3D4C5C6Rh7cic Rhantus cicurus NCBI  
-X-----XX-X- CA1D3D4C5C6Me7pus Melanodytes pustulatus NCBI  
-X-----X- CA1D3D4C5A6Se7tri Senilites tristanicola NCBI  
-XXX-----X-XXXXX- CA1D3D4C5C6Rh7gra Rhantus grapii NCBI  
-XXX-----XXX----CA1D3D4C5C6Rh7sin Rhantus sinuatus NCBI  
-X-----X-X-XX- CA1D3D4C5A6An7bis Anisomeria bistriata NCBI  
-X-----X-XXX- CA1D3D4C5C6Rh7boh Rhantus bohlei NCBI  
-X-X-----XXXXX- CA1D3D4C5C6Rh7and Rhantus andinus NCBI  
-XX-----XX----CA1D3D4C5C6Rh7man Rhantus manjakatomo NCBI  
-XXX-----XXX-XX- CA1D3D4C5C6Rh7not Rhantus notaticollis NCBI  
-XXX-----X-XXX-X- CA1D3D4C5C6Rh7lat Rhantus latitans NCBI  
-XXX-----XXXXXX- CA1D3D4C5C6Rh7exs Rhantus exsoletus NCBI  
-XX-----X-XXX-X- CA1D3D4C5C6Rh7con Rhantus consputus NCBI  
-XX-----XX----CA1D3D4C5C6Rh7inc Rhantus incognitus NCBI  
-XXX-----X-XXX----CA1D3D4C5C6Rh7sutu Rhantus suturellus NCBI  
-XXX-----X-XXX-X- CA1D3D4C5C6Rh7bis Rhantus bistriatus NCBI

-XX-----X-XXX-X- CA1D3D4C5C6Rh7wal Rhantus wallisi NCBI  
-X-----X-X-XX- CA1D3D4C5C6Rh7sig Rhantus signatus NCBI  
-XX-----X- CA1D3D4C5C6Rh7MB1222 Rhantus MBI222 NCBI  
-XX-----XXXXXX- CA1D3D4C5C6Rh7MB3940 Rhantus MB3940 NCBI  
-XXX-----X-XXXXXX- CA1D3D4C5C6Rh7gut Rhantus gutticollis NCBI  
-XX-----X-XXXXXX- CA1D3D4C5C6Rh7sou Rhantus souzannae NCBI  
-X-----X-XXXX- CA1D3D4C5C6Rh7ani Rhantus anisonychus NCBI  
-X-----X-XXXX- CA1D3D4C5C6Rh7dani Rhantus dani NCBI  
-XXX-----X-XXXXXX- CA1D3D4C5C6Rh7bin Rhantus binoTatus NCBI  
-X-----X-XX-XX- CA1D3D4C5C6Bu7dis Bunites distigma NCBI  
-X-----X-X-XXX- CA1D3D4C5C6Rh7pho Rhantus phocaenarum NCBI  
-XXX-----XXXXXX- CA1D3D4C5C6Rh7vit Rhantus vitiensis NCBI  
-XXX-----XXXXXX- CA1D3D4C5C6Rh7kin Rhantus kini NCBI  
-XX-----XXXXXX- CA1D3D4C5C6Rh7bul Rhantus bula NCBI  
-X-----X-XXXXXX- CA1D3D4C5C6Rh7ova Rhantus ovalis NCBI  
-XXX-----X-XXXXXX- CA1D3D4C5C6Rh7sik Rhantus sikkimensis NCBI  
-XXX-----X-XXXXXX- CA1D3D4C5C6Rh7che Rhantus cheesmanae NCBI  
-XXX-----XXXXXX- CA1D3D4C5C6Rh7ann Rhantus annectens NCBI  
-XXX-----X-XXXXXX- CA1D3D4C5C6Rh7eng Rhantus englundi NCBI  
-X-----X-XXXXXX- CA1D3D4C5C6Rh7eka Rhantus ekari NCBI  
-XXX-----X-XXX- CA1D3D4C5C6Rh7sim Rhantus simulans NCBI  
-XX-----X-XXX- CA1D3D4C5C6Rh7rie Rhantus riedeli NCBI  
-XX-----XXXXXX- CA1D3D4C5C6Rh7sup Rhantus supranubicus NCBI  
-XX-----XXXXXX- CA1D3D4C5C6Rh7ped Rhantus pederzani NCBI  
-XXX-----XXXXXX- CA1D3D4C5C6Rh7sut Rhantus suturalis NCBI  
-XXX-----XX-XXX- CA1D3D4C5C6Rh7bac Rhantus bacchusi NCBI  
-XXX-----X-X- CA1D3D4C5C6Rh7huo Rhantus huon NCBI  
-X-----X-XXXXXX- CA1D3D4C5C6Rh7myo Rhantus myo NCBI  
-XXX-----X-X-X- CA1D3D4C5C6Rh7eli Rhantus elisabethae NCBI  
-X-----X-XX-X- CA1D3D4D5D6dy7mar Dytiscus marginicollis NCBI  
-XXX-----XXX-X- CA1D3D4D5D6dy7ver Dytiscus verticalis NCBI  
-X-----XX-XXXXXX- CA1D3D4D5D6dy7per Dytiscus persicus NCBI  
-X-----XX-X- CA1D3D4D5D6dy7lat Dytiscus latissimus NCBI  
-XX-----XX-X- CA1D3D4D5D6dy7dau Dytiscus dauricus NCBI  
-XXX-----XXX- CA1D3D4D5D6dy7marg Dytiscus marginalis NCBI  
-X-----X-XXXXXX- CA1D3D4D5D6dy7thi Dytiscus thianschanicus NCBI  
-XX-----XX- CA1D3D4D5D6dy7cir Dytiscus circumcinctus NCBI  
-XX-----XXXXXX- CA1D3D4D5D6dy7dim Dytiscus dimidiatus NCBI  
-XX-----XXXXXX- CA1D3D4D5D6dy7sem Dytiscus semisulcatus NCBI  
-XXX-----XX-XXX- CA1D3D4D5Ac6Rh7con Rhantaticus congestus NCBI  
-XX-----XX-XXX- CA1D3D4D5E6Er7aus Eretes australis NCBI  
-XX-----X-XX-X- CA1D3D4D5E6Er7gri Eretes griseus NCBI  
-XXX-----X-XX-XXX- CA1D3D4D5E6Er7sti Eretes sticticus NCBI  
-XXX-----X-XXXXXX- CA1D3D4D5Ac6A7can Acilius canaliculatus NCBI  
-X-----X-XXXXXX- CA1D3D4D5Ac6Ae7KBMAsp659 Aethionectes KBMAasp659 NCBI  
-XX-----X-XXXXXX- CA1D3D4D5Ac6Ae7obe Aethionectes oberthueri NCBI  
-X-----X-XXXXXX- CA1D3D4D5Ac6Ae7api Aethionectes apicalis NCBI  
-XXX-----X-XXXXXX- CA1D3D4D5Ac6Ae7ful Aethionectes fulvonotatus NCBI  
-XXX-----X-X-XXXXXX- CA1D3D4D5Ac6A7duv Acilius duvergieri NCBI  
-XXXXXXXXXXXXXXXX-XX- CA1D3D4D5Ac6A7sul Acilius sulcatus IWB idba.3\_MERGED\_MMG\_ANNOT\_FROM\_BARCODE  
-XXX-----X-XXXXXX- CA1D3D4D5Ac6A7jap Acilius japonicus NCBI  
-XXX-----X-XXXXXX- CA1D3D4D5Ac6A7kis Acilius kishii NCBI  
-XXX-----X-XXXXXX- CA1D3D4D5Ac6A7ath Acilius athabasca NCBI  
-XX-----X-XX-XXXXXX- CA1D3D4D5Ac6A7sem Acilius semisulcatus NCBI  
-XXX-----X-XX-XXXXXX- CA1D3D4D5Ac6A7abb Acilius abbreviatus NCBI  
-XXX-----X-XXXXXX- CA1D3D4D5Ac6A7med Acilius mediatus NCBI  
-XXX-----X-XXXXXX- CA1D3D4D5Ac6A7fra Acilius fraternus NCBI  
-XXX-----X-XXXXXX- CA1D3D4D5Ac6A7syl Acilius sylvanus NCBI  
-XXX-----X-XXXXXX- CA1D3D4D5Ac6A7con Acilius confusus NCBI  
-XXX-----X-XX-XXXXXX- CA1D3D4D5Ac6G7lib Graphoderus liberus NCBI  
-XXX-----X-XXXXXX- CA1D3D4D5Ac6G7fas Graphoderus fasciollis NCBI  
-XXX-----X-XXXXXX- CA1D3D4D5Ac6G7bie Graphoderus bieneri NCBI  
-XXX-----X-XXXXXX- CA1D3D4D5Ac6G7ada Graphoderus adamsii NCBI  
-XXX-----X-XXXXXX- CA1D3D4D5Ac6G7per Graphoderus perplexus NCBI  
-XXX-----X-XXXXXX- CA1D3D4D5Ac6G7bil Graphoderus bilineatus NCBI  
-XXX-----X-XXXXXX- CA1D3D4D5Ac6G7zon Graphoderus zonatus NCBI  
-XXX-----X-XXXXXX- CA1D3D4D5Ac6G7aus Graphoderus austriacus NCBI  
-XXX-----X-XXXXXX- CA1D3D4D5Ac6G7occ Graphoderus occidentalis NCBI  
-XXX-----X-XXXXXX- CA1D3D4D5Ac6G7ere Eriophanes eretiiformis NCBI  
-XXX-----X-XXXXXX- CA1D3D4D5Ac6G7mix Sandracottus mixtus NCBI  
-XXX-----X-XXXXXX- CA1D3D4D5Ac6Sa7dej Sandracottus dejeanii NCBI  
-XXX-----X-XXXXXX- CA1D3D4D5Ac6Sa7ins Sandracottus insignis NCBI  
-XXX-----X-XXXXXX- CA1D3D4D5Ac6Sa7bak Sandracottus bakewellii NCBI  
-XX-----X-XXXXXX- CA1D3D4D5Ac6Sa7gue Sandracottus guerini NCBI  
-XXX-----X-XXXXXX- CA1D3D4D5Ac6Th7marg Thermonectus marginiguttatus NCBI  
-XXX-----X-XXXXXX- CA1D3D4D5Ac6Th7var Thermonectus variegatus NCBI  
-XXX-----X-XXXXXX- CA1D3D4D5Ac6Th7mar Thermonectus marmoratus NCBI  
-XX-----X-XXXXXX- CA1D3D4D5Ac6Th7alf Thermonectus alfredi NCBI  
-XXX-----X-XXXXXX- CA1D3D4D5Ac6Th7lep Thermonectus leprieurii NCBI  
-XXX-----X-XXXXXX- CA1D3D4D5Ac6Th7nob Thermonectus nobilis NCBI  
-XXX-----X-XX-XXXXXX- CA1D3D4D5Ac6Th7nig Thermonectus nigrofasciatus NCBI  
-XX-----X-XXXXXX- CA1D3D4D5Ac6Th7cir Thermonectus circumscriptus NCBI  
-XXX-----X-XXXXXX- CA1D3D4D5Ac6Th7inE Thermonectus intermedius NCBI  
-XXX-----X-X-XXXXXX- CA1D3D4D5Ac6Th7bas Thermonectus basillaris NCBI  
-XXX-----X-XXXXXX- CA1D3D4D5Ac6Th7suc Thermonectus succinctus NCBI  
-X-----X-XX-XX- CA1D3D4D5Ac6Th7IR104 Thermonectus IR104 NCBI  
-X-----XX-XXXXXX- CA1D3D4D5Ac6Th7681318 Thermonectus 681318 NCBI  
-XXX-----CA1D3D4D5Hy6Pr7par Prodaticus parallelus NCBI  
-XX-----XXX- CA1D3D4D5H6Hy7cra Hyderodes crassus NCBI  
-XXX-----XXXXXX- CA1D3D4D5H6Hy7shu Hyderodes shuckardi NCBI  
-XXX-----XXX- CA1D3D4D5H6Hy7cin Hydaticus cinctipennis NCBI  
-XXX-----X-XX-XXX- CA1D3D4D5Hy6Pr7tra Prodaticus transversalis NCBI  
-XX-----X-XXXXXX- CA1D3D4D5Hy6Hy7sem Hydaticus seminiger NCBI  
-XXX-----X-XXXXXX- CA1D3D4D5Hy6Hy7con Hydaticus continentalis NCBI  
-XXX-----XXX-XXXXXX- CA1D3D4D5Hy6Hy7aru Hydaticus aruspex NCBI  
-XX-----X-XXXXXX- CA1D3D4D5Hy6Pr7riv Prodaticus rivanolis NCBI  
-XXX-----CA1D3D4D5Hy6Pr7uga Prodaticus ugandaensis NCBI  
-XXX-----X-XXXXXX- CA1D3D4D5Hy6Pr7din Prodaticus dineutoides NCBI  
-XXX-----XX-XXXXXX- CA1D3D4D5Hy6Pr7vit Prodaticus vittatus NCBI  
-XXX-----CA1D3D4D5Hy6Pr7mai Prodaticus maior NCBI

CA1D3D4D5Hy6Pr7phi\_Prodaticus\_philippensis NCBI  
CA1D3D4D5Hy6Pr7qua\_Prodaticus\_quadrvittatus NCBI  
CA1D3D4D5Hy6Pr7fla\_Prodaticus\_flavolineatus NCBI  
CA1D3D4D5Hy6Hy7mad\_Hydaticus\_madagascariensis NCBI  
CA1D3D4D5Hy6Hy7vit\_Hydaticus\_vitticolis NCBI  
CA1D3D4D5Hy6Pr7biv\_Prodaticus\_bivittatus NCBI  
CA1D3D4D5Hy6Pr7buss\_Prodaticus\_ussheri NCBI  
CA1D3D4D5Hy6Pr7pic\_Prodaticus\_pictus NCBI  
CA1D3D4D5Ac6Gr7cin\_Graphoderus\_cinereus NCBI  
CA1D3D4D5Hy6Pr7exc\_Prodaticus\_exclamationis NCBI  
CA1D3D4D5Hy6Pr7lat\_Prodaticus\_lativittis NCBI  
CA1D3D4D5Hy6Pr7spe\_Prodaticus\_speciosus NCBI  
CA1D3D4D5Hy6Hy7sae\_Hydaticus\_saecularis NCBI  
CA1D3D4D5Hy6Pr7hum\_Prodaticus\_humeralis NCBI  
CA1D3D4D5Hy6Hy7pet\_Hydaticus\_petitii NCBI  
CA1D3D4D5Hy6Hy7arc\_Hydaticus\_arcuatus NCBI  
CA1D3D4D5Hy6Pr7caf\_Prodaticus\_caffer NCBI  
CA1D3D4D5Hy6Pr7sub\_Prodaticus\_subfasciatus NCBI  
CA1D3D4D5Hy6Hy7lim\_Hydaticus\_limnetes NCBI  
CA1D3D4D5Hy6Pr7xan\_Prodaticus\_xanthomelas NCBI  
CA1D3D4D5Hy6Pr7nig\_Prodaticus\_nigrotaeniatus NCBI  
CA1D3D4D5Hy6Pr7lit\_Prodaticus\_litigious NCBI  
CA1D3D4D5Hy6Hy7dre\_Hydaticus\_dregei NCBI  
CA1D3D4D5Hy6Pr7dor\_Prodaticus\_dorsiger NCBI  
CA1D3D4D5Hy6Pr7mat\_Prodaticus\_matruelis NCBI  
CA1D3D4D5Hy6Pr7gala\_Prodaticus\_galla NCBI  
CA1D3D4D5Hy6Pr7cap\_Prodaticus\_capicola NCBI  
CA1D3D4D5Hy6Pr7sat\_Prodaticus\_satoi NCBI  
CA1D3D4D5Hy6Pr7bow\_Prodaticus\_bowlingii NCBI  
CA1D3D4D5Hy6Pr7rim\_Prodaticus\_rimosus NCBI  
CA1D3D4D5Hy6Pr7bim\_Prodaticus\_bimarginatus NCBI  
CA1D3D4D5Hy6Pr7bih\_Prodaticus\_bihamatus NCBI  
CA1D3D4D5Hy6Pr7ori\_Prodaticus\_orissaensis NCBI  
CA1D3D4D5Hy6Pr7luc\_Prodaticus\_luczonicus NCBI  
CA1D3D4D5Hy6Pr7con\_Prodaticus\_consanguineus NCBI  
CA1D3D4DBAUBT17\_Dytiscidae\_DBAUBT17 NCBI  
CA1D3D4D5Hy6Hy7sob\_Hydaticus\_sobrinus NCBI  
CA1D3D4D5Hy6Hy7kol\_Hydaticus\_kolbei NCBI  
CA1D3D4D5Hy6Pr7lea\_Prodaticus\_leander NCBI  
CA1D3D4D5Hy6Pr7ser\_Prodaticus\_servillianus NCBI  
CA1D3D4D5Hy6Pr7rha\_Prodaticus\_rhantoides NCBI  
CA1D3D4D5Hy6Pr7wat\_Prodaticus\_wattsi NCBI  
CA1D3D4D5Hy6Pr7ric\_Prodaticus\_ricinus NCBI  
CA1D3D4D5Hy6Pr7gra\_Prodaticus\_grammicus NCBI  
CA1D3D4D5Hy6Pr7fab\_Prodaticus\_fabricii NCBI  
CA1D3D4Co5C6Co7\_Copelatus\_sp\_JX220995  
CA1D3D4Co5C6Pa7MB292\_Papuadytes\_MB292 NCBI  
CA1D3D4Co5C6Ex7nov\_Exocelina\_novaecaledoniae NCBI  
CA1D3D4Co5C6Pa7MB137\_Papuadytes\_MB137 NCBI  
CA1D3D4Co5C6Pa7MB128\_Papuadytes\_MB128 NCBI  
CA1D3D4Co5C6Ex7bou\_Exocelina\_boulevardi NCBI  
CA1D3D4Co5C6Pa7MB107\_Papuadytes\_MB107 NCBI  
CA1D3D4Co5C6Pa7aus\_Papuadytes\_australiae NCBI  
CA1D3D4Co5C6Pa7mel\_Papuadytes\_melanarius NCBI  
CA1D3D4Co5C6Ex7aus\_Exocelina\_australiae NCBI  
CA1D3D4Co5C6Pa7bou\_Papuadytes\_boulevardi NCBI  
CA1D3D4Co5C6Ex7gap\_Exocelina\_gapa NCBI  
CA1D3D4Co5C6Pa7MB481\_Papuadytes\_MB481 NCBI  
CA1D3D4Co5C6Pa7MB483\_Papuadytes\_MB483 NCBI  
CA1D3D4Co5C6Pa7gyl\_Papuadytes\_glyptus NCBI  
CA1D3D4Co5C6Pa7MB487\_Papuadytes\_MB487 NCBI  
CA1D3D4Co5C6Pa7MB485\_Papuadytes\_MB485 NCBI  
CA1D3D4Co5C6Pa7aust\_Papuadytes\_australis NCBI  
CA1D3D4Co5C6Ex7atr\_Exocelina\_atra NCBI  
CA1D3D4Co5C6Pa7MB106\_Papuadytes\_MB106 NCBI  
CA1D3D4Co5C6Pa7pun\_Papuadytes\_punctipennis NCBI  
CA1D3D4Co5C6Pa7MB105\_Papuadytes\_MB105 NCBI  
CA1D3D4Co5C6Pa7fer\_Papuadytes\_ferrugineus NCBI  
CA1D3D4Co5C6Pa7MB104\_Papuadytes\_MB104 NCBI  
CA1D3D4Co5C6Pa7abd\_Papuadytes\_abditus NCBI  
CA1D3D4Co5C6Co7chee\_Copelatus\_cheesmanae NCBI  
CA1D3D4Co5C6Pa7shi\_Papuadytes\_shizonei NCBI  
CA1D3D4Co5C6Pa7aub\_Papuadytes\_aubei NCBI  
CA1D3D4Co5C6Pa7MB001\_Papuadytes\_MB001 NCBI  
CA1D3D4Co5C6Pa7MB170\_Papuadytes\_MB170 NCBI  
CA1D3D4Co5C6Pa7per\_Papuadytes\_perfectus NCBI  
CA1D3D4Co5C6Pa7MB133\_Papuadytes\_MB133 NCBI  
CA1D3D4Co5C6Pa7MB166\_Papuadytes\_MB166 NCBI  
CA1D3D4Co5C6Pa7bro\_Papuadytes\_brownei NCBI  
CA1D3D4Co5C6Pa7MB163\_Papuadytes\_MB163 NCBI  
CA1D3D4Co5C6Ex7poe\_Exocelina\_poeilabauerae NCBI  
CA1D3D4Co5C6Pa7MB035\_Papuadytes\_MB035 NCBI  
CA1D3D4Co5C6Pa7MB121\_Papuadytes\_MB121 NCBI  
CA1D3D4Co5C6Pa7MB122\_Papuadytes\_MB122 NCBI  
CA1D3D4Co5C6Pa7MB138\_Papuadytes\_MB138 NCBI  
CA1D3D4Co5C6Pa7com\_Papuadytes\_commatifer NCBI  
CA1D3D4Co5C6Pa7MB020\_Papuadytes\_MB020 NCBI  
CA1D3D4Co5C6Pa7MB039\_Papuadytes\_MB039 NCBI  
CA1D3D4Co5C6Pa7MB040\_Papuadytes\_MB040 NCBI  
CA1D3D4Co5C6Pa7MB254\_Papuadytes\_MB254 NCBI  
CA1D3D4Co5C6Pa7MB135\_Papuadytes\_MB135 NCBI  
CA1D3D4Co5C6Pa7MB130\_Papuadytes\_MB130 NCBI  
CA1D3D4Co5C6Pa7bim\_Papuadytes\_bimaculatus NCBI  
CA1D3D4Co5C6Pa7int\_Papuadytes\_interruptus NCBI  
CA1D3D4Co5C6Ex7MB0688\_Exocelina\_MB0688 NCBI  
CA1D3D4Co5C6Ex7MB3840\_Exocelina\_MB3840 NCBI  
CA1D3D4Co5C6Ex7MB1313\_Exocelina\_MB1313 NCBI  
CA1D3D4Co5C6Pa7MB688\_Papuadytes\_MB688 NCBI  
CA1D3D4Co5C6Pa7MB269\_Papuadytes\_MB269 NCBI

---XX---X---X---CA1D3D4Co5C6Ex7at Exocelina tarsoni NCBI  
---X---X---XX---CA1D3D4Co5C6Pa7MB259 Papuadytes MB259 NCBI  
---X---X---XX---CA1D3D4Co5C6Pa7MB265 Papuadytes MB265 NCBI  
---X---X---XX---CA1D3D4Co5C6Pa7MB258 Papuadytes MB258 NCBI  
---XX---X---X---CA1D3D4Co5C6Ex7MB1269 Exocelina MBI269 NCBI  
---X---X---X---CA1D3D4Co5C6Ex7MB1297 Exocelina MBI297 NCBI  
---XX---X---X---CA1D3D4Co5C6Ex7bag Exocelina bagus NCBI  
---X---X---X---CA1D3D4Co5C6Ex7MB1379 Exocelina MBI1379 NCBI  
---XX---X---X---CA1D3D4Co5C6Ex7ull Exocelina ullrichi NCBI  
---X---X---XX---CA1D3D4Co5C6Pa7ull Papuadytes ullrichi NCBI  
---XX---X---X---CA1D3D4Co5C6Ex7MB1364 Exocelina MB1364 NCBI  
---X---X---X---CA1D3D4Co5C6Ex7MB0886 Exocelina MB0886 NCBI  
---XX---X---X---CA1D3D4Co5C6Ex7MB1377 Exocelina MB1377 NCBI  
---XX---X---X---CA1D3D4Co5C6Ex7MB1296 Exocelina MB1296 NCBI  
---XX---X---X---CA1D3D4Co5C6Ex7MB4921 Exocelina MB4921 NCBI  
---X---X---XX---CA1D3D4Co5C6Pa7MB686 Papuadytes MB686 NCBI  
---XX---X---X---CA1D3D4Co5C6Ex7MB1530 Exocelina MB1530 NCBI  
---X---X---XX---CA1D3D4Co5C6Pa7MB660 Papuadytes MB660 NCBI  
---X---X---XX---CA1D3D4Co5C6Pa7MB683 Papuadytes MB683 NCBI  
---X---X---XX---CA1D3D4Co5C6Pa7MB658 Papuadytes MB658 NCBI  
---X---X---X---CA1D3D4Co5C6Ex7MB1292 Exocelina MBI292 NCBI  
---X---X---XX---CA1D3D4Co5C6Pa7MB657 Papuadytes MB657 NCBI  
---X---X---XX---CA1D3D4Co5C6Pa7MB679 Papuadytes MB679 NCBI  
---X---X---XX---CA1D3D4Co5C6Pa7MB680 Papuadytes MB680 NCBI  
---XX---X---X---CA1D3D4Co5C6Ex7MB3315 Exocelina MB3315 NCBI  
---X---X---XX---CA1D3D4Co5C6Pa7MB671 Papuadytes MB671 NCBI  
---X---X---XX---CA1D3D4Co5C6Pa7MB670 Papuadytes MB670 NCBI  
---X---X---X---CA1D3D4Co5C6Pa7MB066 Papuadytes MB066 NCBI  
---XX---X---X---CA1D3D4Co5C6Ex7MB0066 Exocelina MB0066 NCBI  
---X---X---X---CA1D3D4Co5C6Ex7MB0671 Exocelina MB0671 NCBI  
---X---X---X---CA1D3D4Co5C6Ex7MB0680 Exocelina MB0680 NCBI  
---X---X---XX---CA1D3D4Co5C6Pa7MB662 Papuadytes MB662 NCBI  
---XX---X---X---CA1D3D4Co5C6Ex7MB1302 Exocelina MB1302 NCBI  
---X---X---XX---CA1D3D4Co5C6Pa7MB664 Papuadytes MB664 NCBI  
---XX---X---X---CA1D3D4Co5C6Ex7MB1360 Exocelina MB1360 NCBI  
---XX---X---X---CA1D3D4Co5C6Ex7MB1290 Exocelina MB1290 NCBI  
---XX---X---X---CA1D3D4Co5C6Ex7MB1337 Exocelina MB1337 NCBI  
---XX---X---X---CA1D3D4Co5C6Ex7MB3312 Exocelina MB3312 NCBI  
---XX---X---X---CA1D3D4Co5C6Ex7des Exocelina desii NCBI  
---XX---X---X---CA1D3D4Co5C6Ex7wey Exocelina weylandensis NCBI  
---XX---X---X---CA1D3D4Co5C6Ex7MB3761 Exocelina MB3761 NCBI  
---X---X---X---CA1D3D4Co5C6Ex7mun Exocelina munaso NCBI  
---X---X---XX---CA1D3D4Co5C6Pa7MB266 Papuadytes MB266 NCBI  
---X---X---X---CA1D3D4Co5C6Ex7MB4922 Exocelina MB4922 NCBI  
---X---X---XX---CA1D3D4Co5C6Pa7MB261 Papuadytes MB261 NCBI  
---XX---X---X---CA1D3D4Co5C6Ex7MB1289 Exocelina MB1289 NCBI  
---XX---X---X---CA1D3D4Co5C6Ex7MB1369 Exocelina MB1369 NCBI  
---XX---X---X---CA1D3D4Co5C6Ex7MB3311 Exocelina MB3311 NCBI  
---X---X---X---CA1D3D4Co5C6Ex7MB3759 Exocelina MB3759 NCBI  
---X---X---XX---CA1D3D4Co5C6Pa7MB273 Papuadytes MB273 NCBI  
---X---X---XX---CA1D3D4Co5C6Pa7MB267 Papuadytes MB267 NCBI  
---X---X---X---CA1D3D4Co5C6Ex7ato Exocelina atowaso NCBI  
---XX---X---X---CA1D3D4Co5C6Ex7ast Exocelina astrophalus NCBI  
---X---X---XX---CA1D3D4Co5C6Pa7mun Papuadytes munaso NCBI  
---XX---X---X---CA1D3D4Co5C6Ex7ang Exocelina anggiensis NCBI  
---XX---X---X---CA1D3D4Co5C6Ex7arf Exocelina arfakensis NCBI  
---XX---X---X---CA1D3D4Co5C6Ex7MB1275 Exocelina MB1275 NCBI  
---XX---X---X---CA1D3D4Co5C6Ex7eve Exocelina evelyncheesmanae NCBI  
---XX---X---X---CA1D3D4Co5C6Ex7MB1277 Exocelina MB1277 NCBI  
---XX---X---X---CA1D3D4Co5C6Ex7MB3321 Exocelina MB3321 NCBI  
---X---X---XX---CA1D3D4Co5C6Pa7MB262 Papuadytes MB262 NCBI  
---XX---X---X---CA1D3D4Co5C6Ex7kno Exocelina knoepfchen NCBI  
---XX---X---X---CA1D3D4Co5C6Ex7MB1373 Exocelina MB1373 NCBI  
---XX---X---X---CA1D3D4Co5C6Ex7bur Exocelina burdiansis NCBI  
---XX---X---X---CA1D3D4Co5C6Ex7MB1307 Exocelina MB1307 NCBI  
---XX---X---X---CA1D3D4Co5C6Ex7iri Exocelina irianensis NCBI  
---XX---X---X---CA1D3D4Co5C6Ex7MB1321 Exocelina MB1321 NCBI  
---X---X---XX---CA1D3D4Co5C6Pa7MB056 Papuadytes MB056 NCBI  
---XX---X---X---CA1D3D4Co5C6Ex7MB4427 Exocelina MB4427 NCBI  
---XX---X---X---CA1D3D4Co5C6Ex7ede Exocelina edeltraudae NCBI  
---X---X---XX---CA1D3D4Co5C6Pa7MB666 Papuadytes MB666 NCBI  
---X---X---XX---CA1D3D4Co5C6Pa7MB672 Papuadytes MB672 NCBI  
---XX---X---X---CA1D3D4Co5C6Ex7MB1372 Exocelina MB1372 NCBI  
---XX---X---X---CA1D3D4Co5C6Ex7kak Exocelina kakapupi NCBI  
---X---X---XX---CA1D3D4Co5C6Pa7MB659 Papuadytes MB659 NCBI  
---X---X---XX---CA1D3D4Co5C6Pa7MB059 Papuadytes MB059 NCBI  
---XX---X---X---CA1D3D4Co5C6Ex7bra Exocelina brahminensis NCBI  
---XX---X---X---CA1D3D4Co5C6Ex7sop Exocelina soppi NCBI  
---XX---X---X---CA1D3D4Co5C6Ex7uto Exocelina utowaensis NCBI  
---XX---X---X---CA1D3D4Co5C6Ex7MB0060 Exocelina MB0060 NCBI  
---XX---X---X---CA1D3D4Co5C6Ex7MB4916 Exocelina MB4916 NCBI  
---XX---X---X---CA1D3D4Co5C6Ex7MB1295 Exocelina MB1295 NCBI  
---X---X---XXX---CA1D3D4Co5C6Pa7IR073 Papuadytes IR073 NCBI  
---XX---X---X---CA1D3D4Co5C6Ex7uni Exocelina unipo NCBI  
---XX---X---X---CA1D3D4Co5C6Ex7MB3330 Exocelina MB3330 NCBI  
---XX---X---X---CA1D3D4Co5C6Ex7MB3405 Exocelina MB3405 NCBI  
---XX---X---X---CA1D3D4Co5C6Ex7aip Exocelina aipomek NCBI  
---X---X---XX---CA1D3D4Co5C6Pa7MB257 Papuadytes MB257 NCBI  
---XX---X---X---CA1D3D4Co5C6Ex7MB3408 Exocelina MB3408 NCBI  
---X---X---XX---CA1D3D4Co5C6Ex7MB0257 Exocelina MB0257 NCBI  
---XX---X---X---CA1D3D4Co5C6Ex7MB1383 Exocelina MB1383 NCBI  
---X---X---XX---CA1D3D4Co5C6Pa7MB263 Papuadytes MB263 NCBI  
---XX---X---X---CA1D3D4Co5C6Ex7MB1520 Exocelina MB1520 NCBI  
---XX---X---X---CA1D3D4Co5C6Ex7mar Exocelina marinae NCBI  
---XX---X---X---CA1D3D4Co5C6Ex7MB1287 Exocelina MB1287 NCBI  
---XX---X---X---CA1D3D4Co5C6Ex7hin Exocelina hintelmanni NCBI  
---X---X---XX---CA1D3D4Co5C6Pa7MB256 Papuadytes MB256 NCBI  
---X---X---XX---CA1D3D4Co5C6Pa7hin Papuadytes hintelmannae NCBI  
---XX---X---X---CA1D3D4Co5C6Ex7MB3303 Exocelina MB3303 NCBI  
---XX---X---X---CA1D3D4Co5C6Ex7MB1361 Exocelina MB1361 NCBI

--XX-----X-----X--\_CA1D3D4Co5C6E7MB3399\_Exocelina\_MB3399\_NCBI  
--XX-----X-----X--\_CA1D3D4Co5C6E7MB3404\_Exocelina\_MB3404\_NCBI  
-X-----X-XX-----X-CA1D3D4Co5C6Pa7MB667\_Papudytes\_MB667\_NCBI  
--XX-----X-----X--\_CA1D3D4Co5C6E7MB1376\_Exocelina\_MB1376\_NCBI  
--XX-----X-----X--\_CA1D3D4Co5C6E7MB1285\_Exocelina\_MB1285\_NCBI  
--XX-----X-----X--\_CA1D3D4Co5C6E7pat\_Exocelina\_patepensis\_NCBI  
--XX-----X-----X--\_CA1D3D4Co5C6E7dam\_Exocelina\_damantiensis\_NCBI  
-XX-----X-----X--\_CA1D3D4Co5C6E7MB1366\_Exocelina\_MB1366\_NCBI  
--XX-----X-----X--\_CA1D3D4Co5C6E7MB3406\_Exocelina\_MB3406\_NCBI  
--XX-----X-----X--\_CA1D3D4Co5C6E7mon\_Exocelina\_monae\_NCBI  
--XX-----X-----X--\_CA1D3D4Co5C6E7MB1375\_Exocelina\_MB1375\_NCBI  
--XX-----X-----X--\_CA1D3D4Co5C6E7mir\_Exocelina\_miriae\_NCBI  
--XX-----X-----X--\_CA1D3D4Co5C6E7MB0673\_Exocelina\_MB0673\_NCBI  
--XX-----X-----X--\_CA1D3D4Co5C6E7MB3876\_Exocelina\_MB3876\_NCBI  
-X-----X-XX-X--\_CA1D3D4Co5C6Pa7MB268\_Papudytes\_MB268\_NCBI  
-X-----X-XX-X--\_CA1D3D4Co5C6Pa7MB656\_Papudytes\_MB656\_NCBI  
-X-----X-XX-----X-CA1D3D4Co5C6Pa7MB685\_Papudytes\_MB685\_NCBI  
--XX-----X-----X--\_CA1D3D4Co5C6E7MB3409\_Exocelina\_MB3409\_NCBI  
--XX-----X-----X--\_CA1D3D4Co5C6E7jas\_Exocelina\_jaseminae\_NCBI  
-X-----X-XX-X--\_CA1D3D4Co5C6Pa7mir\_Papudytes\_miriae\_NCBI  
--XX-----X-XX-X--\_CA1D3D4Co5C6L1atr\_Liopterus\_atriceps\_NCBI  
-X-----X-XXX--\_CA1D3D4Co5C6Co7aru\_Copelatus\_aruensis\_NCBI  
XXXXXXXXXXXXXXXXXX-CA1D3D4Co5C6L1iopterus\_Liopterus\_rhodesialis\_1vwb.idba.11\_MERGED\_MMG\_ANNOT\_FROM\_BARCODE  
-X-----X-----X-CA1D3D4Co5C6Ma7MTM2009\_9\_Madaglymbus\_MTM2009\_NCBI  
-X-----X-----X-CA1D3D4Co5C6Ma7MTM2009\_3\_Madaglymbus\_MTM2009\_NCBI  
-X-----X-----X-CA1D3D4Co5C6Ma7MTM2009\_2\_Madaglymbus\_MTM2009\_NCBI  
-X-----X-----X-CA1D3D4Co5C6Ma7MTM2009\_4\_Madaglymbus\_MTM2009\_NCBI  
-X-----X-----X-CA1D3D4Co5C6Ma7MTM2009\_Madaglymbus\_MTM2009\_NCBI  
-X-----X-----X-CA1D3D4Co5C6Ma7MTM2009\_1\_Madaglymbus\_MTM2009\_NCBI  
-X-----X-----X-CA1D3D4Co5C6Ma7MTM2009\_11\_Madaglymbus\_MTM2009\_NCBI  
-X-----X-----X-CA1D3D4Co5C6Ma7MTM2009\_10\_Madaglymbus\_MTM2009\_NCBI  
-X-----X-----X-CA1D3D4Co5C6Ma7MTM2009\_7\_Madaglymbus\_MTM2009\_NCBI  
-X-----X-----X-CA1D3D4H5B08I2011\_Hydroporinae\_BI2011\_NCBI  
-X-----X-----X-CA1D3D4Co5C6Ma7MTM2009\_6\_Madaglymbus\_MTM2009\_NCBI  
-X-----X-----X-CA1D3D4Co5C6Ma7MTM2009\_5\_Madaglymbus\_MTM2009\_NCBI  
-XX-----XXX--\_CA1D3D4Co5C6Aga7sil\_Agaporomorphus\_silvaticus\_NCBI  
-XX-----X-X-X--\_CA1D3D4Co5C6Aga7tam\_Agaporomorphus\_tambopatensis\_NCBI  
-XX-----X-XX-X--\_CA1D3D4Co5C6Aga7kni\_Agaporomorphus\_knischi\_NCBI  
-X-----X-XX-----X-CA1D3D4Co5C6Ag7MB009\_Aglymbus\_MB009\_NCBI  
-X-----X-XX-----X-CA1D3D4Co5C6Ma7BI2011\_Madaglymbus\_BI2011\_NCBI  
-X-----X-XX-----X-CA1D3D4Co5C6Ag7elo\_Aglymbus\_elongatus\_NCBI  
-X-----X-XX-----X-CA1D3D4Co5C6Ma7MB2014\_Madaglymbus\_MB2014\_NCBI  
-XX-----X-XX-X--\_CA1D3D4Co5C6Ma7rut\_Madaglymbus\_ruthwaldae\_NCBI  
-X-----X-XX-----X-CA1D3D4Co5C6Ag7MB2008\_Aglymbus\_BM2008\_NCBI  
-X-----X-XX-----X-CA1D3D4Co5C6Aga7nil\_Aglymbus\_nilatus\_NCBI  
-X-----X-XX-----X-CA1D3D4Co5C6Ag7MB2014\_1\_Aglymbus\_MB2014\_NCBI  
-X-----X-XX-----X-CA1D3D4Co5C6Ag7lep\_Aglymbus\_leprieurii\_NCBI  
-X-----X-XX-----X-CA1D3D4Co5C6Ag7MB2014\_Aglymbus\_MB2014\_NCBI  
-X-----X-XX-----X-CA1D3D4Co5C6Ag7MB321\_Aglymbus\_MB321\_NCBI  
-X-----X-XX-----X-CA1D3D4Co5C6Ag7MB322\_Aglymbus\_MB322\_NCBI  
-XX-----X-XX-----X-CA1D3D4Co5C6La7ER9\_Lacconectus\_ER9\_NCBI  
-XX-----X-XX-----X-CA1D3D4Co5C6La7sab\_Lacconectus\_sabahensis\_NCBI  
-X-----X-XX-----X-CA1D3D4Co5C6La7693509\_Lacconectus\_693509\_NCBI  
-XX-----X-X-X--\_CA1D3D4Co5C6La7reg\_Lacconectus\_regimbarti\_NCBI  
-X-----X-XX-----X-CA1D3D4Co5C6La7and\_Lacconectus\_andrewesi\_NCBI  
-X-----X-XX-----X-CA1D3D4Co5C6La7MB043\_Lacconectus\_MB043\_NCBI  
-X-----X-XX-----X-CA1D3D4Co5C6La7kri\_Lacconectus\_krikkeni\_NCBI  
-XXX-CA1D3D4JH2010\_Dytiscidae\_JH2010\_NCBI  
-X-----X-XX-----X-CA1D3D4Co5C6La7atl\_Lacconectus\_atlas\_NCBI  
-X-----X-XXX-XX-CA1D3D4Co5C6La7peg\_Lacconectus\_peguensis\_NCBI  
-XX-----X-X-X--\_CA1D3D4Co5C6Ag7bro\_Aglymbus\_bromeliarum\_NCBI  
-X-----X-X-X--\_CA1D3D4Co5C6Co7abo\_Copelatus\_abonenci\_NCBI  
-X-----X-X-X--\_CA1D3D4Co5C6Co7647\_Copelatus\_647\_NCBI  
-X-----X-XX-X--\_CA1D3D4Co5C6Co78\_Copelatus\_8\_NCBI  
-X-----X-X-X--\_CA1D3D4Co5C6Co7327\_Copelatus\_327\_NCBI  
-X-----X-X-X--\_CA1D3D4Co5C6Co7con\_Copelatus\_concolorans\_NCBI  
-X-----X-X-X--\_CA1D3D4Co5C6Co7311\_Copelatus\_311\_NCBI  
-X-----X-X-X--\_CA1D3D4Co5C6Co7BM2008\_4\_Copelatus\_BM2008\_NCBI  
-X-----X-X-X--\_CA1D3D4Co5C6Ag7bim\_Aglymbus\_bimaculatus\_NCBI  
-X-----X-X-X--\_CA1D3D4Co5C6Co7754\_Copelatus\_754\_NCBI  
-XX-----X-X-X--\_CA1D3D4Co5C6Co7ten\_Copelatus\_tenebrosus\_NCBI  
-X-----X-X-X--\_CA1D3D4Co5C6Co7757\_Copelatus\_757\_NCBI  
-X-----X-X-X--\_CA1D3D4Co5C6Co7BM2008\_2\_Copelatus\_BM2008\_NCBI  
-X-----X-XX-----X-CA1D3D4Co5C6Co7MB212\_Copelatus\_MB212\_NCBI  
-X-----X-X-X--\_CA1D3D4Co5C6Co787\_Copelatus\_787\_NCBI  
-X-----X-X-X--\_CA1D3D4Co5C6Co7MB211\_Copelatus\_MB211\_NCBI  
-X-----X-XX-----X-CA1D3D4Co5C6Co71193\_Copelatus\_1193\_NCBI  
-X-----X-XX-----X-CA1D3D4Co5C6Co7325\_Copelatus\_325\_NCBI  
-X-----X-X-X--\_CA1D3D4Co5C6Co7BM2008\_1\_Copelatus\_BM2008\_NCBI  
-X-----X-X-X--\_CA1D3D4Co5C6Co7BM2008\_Copelatus\_BM2008\_NCBI  
-X-----X-XX-----X-CA1D3D4Co5C6Co7MB206\_Copelatus\_MB206\_NCBI  
-X-----X-X-X--\_CA1D3D4Co5C6Co7BM2008\_3\_Copelatus\_BM2008\_NCBI  
-X-----X-X-X--\_CA1D3D4Co5C6Co7309\_Copelatus\_309\_NCBI  
-X-----X-X-X--\_CA1D3D4Co5C6Co7074\_Copelatus\_074\_NCBI  
-X-----X-X-X--\_CA1D3D4Co5C6Co7646\_Copelatus\_646\_NCBI  
-X-----X-X-X--\_CA1D3D4Co5C6Co7758\_Copelatus\_758\_NCBI  
-X-----X-X-X--\_CA1D3D4Co5C6Co7226\_Copelatus\_226\_NCBI  
-X-----X-X-XX-----X-CA1D3D4Co5C6Co7231\_Copelatus\_231\_NCBI  
-X-----X-X-X--\_CA1D3D4Co5C6Co7202\_Copelatus\_202\_NCBI  
-X-----X-X-X--\_CA1D3D4Co5C6Co7785\_Copelatus\_785\_NCBI  
-X-----X-X-X--\_CA1D3D4Co5C6Co7233\_Copelatus\_233\_NCBI  
-X-----X-X-X--\_CA1D3D4Co5C6Co7229\_Copelatus\_229\_NCBI  
-XX-----X-X-X--\_CA1D3D4Co5C6Co7dist\_Copelatus\_distinguendus\_NCBI  
-X-----X-X-X--\_CA1D3D4Co5C6Co7BM2008\_6\_Copelatus\_BM2008\_NCBI  
-X-----X-X-X--\_CA1D3D4Co5C6Co7BM2008\_7\_Copelatus\_BM2008\_NCBI  
-X-----X-X-X--\_CA1D3D4Co5C6Co7BM2008\_5\_Copelatus\_BM2008\_NCBI  
-X-----X-X-X--\_CA1D3D4Co5C6Co7875\_Copelatus\_075\_NCBI  
-XX-----X-XXX--\_CA1D3D4Co5C6Co7dis\_Copelatus\_distinctus\_NCBI  
-X-----X-XX-X--\_CA1D3D4Co5C6Pa7MB165\_Papudytes\_MB165\_NCBI  
-X-----X-XX-X--\_CA1D3D4Co5C6Pa7MB019\_Papudytes\_MB019\_NCBI

--X-----X-X-----CA1D3D4Co5C6Co71194\_Copelatus\_1194\_NCB1  
--X-----X-X-----CA1D3D4Co5C6Co71199\_Copelatus\_1199\_NCB1  
--X-----X-X-----CA1D3D4Co5C6Co7651\_Copelatus\_651\_NCB1  
--X-----X-X-----CA1D3D4Co5C6Co7147\_Copelatus\_147\_NCB1  
--X-----X-XX-----CA1D3D4Co5C6Co7MB189\_Copelatus\_MB189\_NCB1  
--X-----X-XX-----CA1D3D4Co5C6Co71241\_Copelatus\_1241\_NCB1  
--X-----X-X-----CA1D3D4Co5C6Co7620\_Copelatus\_620\_NCB1  
--X-----X-X-----CA1D3D4Co5C6Co7783\_Copelatus\_783\_NCB1  
--X-----X-XX-----CA1D3D4Co5C6Co7MB175\_Copelatus\_MB175\_NCB1  
--X-----X-XX-----CA1D3D4Co5C6Co7MB110\_Copelatus\_MB110\_NCB1  
--X-----X-XX-----CA1D3D4Co5C6Co7obl\_Copelatus\_oblitus\_NCB1  
--X-----X-----X\_CA1D3D4Co5C6Co7MTM2009\_2\_Copelatus\_MTM2009\_NCB1  
--X-----X-----X\_CA1D3D4Co5C6Co7MTM2009\_3\_Copelatus\_MTM2009\_NCB1  
--X-----X-----X\_CA1D3D4Co5C6Co7MTM2009\_4\_Copelatus\_MTM2009\_NCB1  
--X-----X-----X\_CA1D3D4Co5C6Co7MTM2009\_Copelatus\_MTM2009\_NCB1  
--X-----X-----X-----CA1D3D4Co5C6Co7mar\_Copelatus\_marginatus\_NCB1  
--X-----X-XX-----CA1D3D4Co5C6Co7MB222\_Copelatus\_MB222\_NCB1  
--X-----X-X-----CA1D3D4Co5C6Co7deb\_Copelatus\_debilis\_NCB1  
--X-----X-XX-----CA1D3D4Co5C6Co7MB224\_Copelatus\_MB224\_NCB1  
--X-----X-XX-----CA1D3D4Co5C6Co7cae\_Copelatus\_caelatipennis\_NCB1  
--X-----X-XX-X-----CA1D3D4Co5C6Co7MB188\_Copelatus\_MB188\_NCB1  
--XX-----X-----X-----CA1D3D4Co5C6Co7ass\_Copelatus\_assimilis\_NCB1  
--X-----X-XX-----CA1D3D4Co5C6Co7MB178\_Copelatus\_MB178\_NCB1  
--X-----X-XX-----CA1D3D4Co5C6Co7MB143\_Copelatus\_MB143\_NCB1  
--XX-----X-----X-----CA1D3D4Co5C6Co7gar\_Copelatus\_gardneri\_NCB1  
--XXX-----CA1D3D4Co5C6Co7COP02\_Copelatus\_sp\_COP02\_JX412773  
--X-----X-XX-----CA1D3D4Co5C6Co7MB062\_Copelatus\_MB062\_NCB1  
--X-----X-XX-----CA1D3D4Co5C6Co7MB069\_Copelatus\_MB069\_NCB1  
--X-----XX-X-----CA1D3D4Co5C6Ag7ges\_Aglymbus\_gestroi\_NCB1  
--X-----X-XX-----CA1D3D4Co5C6Co7MB008\_Copelatus\_MB008\_NCB1  
--X-----X-----X\_CA1D3D4Co5C6Co7BI2011\_Copelatus\_BI2011\_NCB1  
--X-----X-XX-----X\_CA1D3D4Co5C6Co7MTM2009\_1\_Copelatus\_MTM2009\_NCB1  
--X-----X-XX-----CA1D3D4Co5C6Co7MB109\_Copelatus\_MB109\_NCB1  
--X-----XX-----CA1D3D4Co5C6Co7irr\_Copelatus\_irregularis\_NCB1  
--X-----XX-----CA1D3D4Co5C6Co7cla\_Copelatus\_clarki\_NCB1  
--X-----XX-----CA1D3D4Co5C6Co7MB001\_Copelatus\_MB001\_NCB1  
--X-----XX-X-----CA1D3D4Co5C6Co7nig\_Copelatus\_nigrolineatus\_NCB1  
--X-----XX-----CA1D3D4Co5C6Co7MB085\_Copelatus\_MB085\_NCB1  
--X-----XX-----CA1D3D4Co5C6Co7MB054\_Copelatus\_MB054\_NCB1  
--X-----X-XX-----CA1D3D4Co5C6Co7MB053\_Copelatus\_MB053\_NCB1  
--X-----X-----XX-----CA1D3D4Co5C6Co7MB055\_Copelatus\_MB055\_NCB1  
--X-----X-----XX-----CA1D3D4Co5C6Co7MB058\_Copelatus\_MB058\_NCB1  
--X-----X-XX-----CA1D3D4Co5C6Co7MB051\_Copelatus\_MB051\_NCB1  
--X-----X-----XX-----CA1D3D4Co5C6Co7MB061\_Copelatus\_MB061\_NCB1  
--X-----X-XX-X-----CA1D3D4Co5C6Co7MB270\_Copelatus\_MB270\_NCB1  
--X-----X-XX-----CA1D3D4Co5C6Co7012VI547\_Copelatus\_021VI547\_NCB1  
--X-----X-XX-----CA1D3D4Co5C6Co7012VI549\_Copelatus\_021VI549\_NCB1  
--X-----X-XX-----CA1D3D4Co5C6Co7002VI511\_Copelatus\_002VI511\_NCB1  
--X-----X-XX-----CA1D3D4Co5C6Co7008VI523\_Copelatus\_008VI523\_NCB1  
--X-----X-XX-----CA1D3D4Co5C6Co7012VI539\_Copelatus\_012VI539\_NCB1  
--X-----X-XX-----CA1D3D4Co5C6Co7012VI541\_Copelatus\_012VI541\_NCB1  
--X-----X-XX-----CA1D3D4Co5C6Co7001VI492\_Copelatus\_001VI492\_NCB1  
--X-----X-XX-----CA1D3D4Co5C6Co7001VI491\_Copelatus\_001VI491\_NCB1  
--X-----X-XX-----CA1D3D4Co5C6Co7018VA559\_Copelatus\_018VA559\_NCB1  
--X-----X-----X-----CA1D3D4Co5C6Co7034LA698\_Copelatus\_034LA698\_NCB1  
--X-----X-XX-----CA1D3D4Co5C6Co7006VI521\_Copelatus\_006VI521\_NCB1  
--X-----X-XX-----CA1D3D4Co5C6Co7006VI519\_Copelatus\_006VI519\_NCB1  
--X-----X-XX-----CA1D3D4Co5C6Co7017VI553\_Copelatus\_017VI553\_NCB1  
--X-----X-XX-----CA1D3D4Co5C6Co7017VI554\_Copelatus\_017VI554\_NCB1  
--X-----X-XX-----CA1D3D4Co5C6Co7002VI508\_Copelatus\_002VI508\_NCB1  
--X-----X-XX-----CA1D3D4Co5C6Co7002VI506\_Copelatus\_002VI506\_NCB1  
--X-----X-XX-----CA1D3D4Co5C6Co7002VI503\_Copelatus\_002VI503\_NCB1  
--X-----X-XX-----CA1D3D4Co5C6Co7008VI528\_Copelatus\_008VI528\_NCB1  
--X-----X-XX-----CA1D3D4Co5C6Co7008VI522\_Copelatus\_008VI522\_NCB1  
--X-----X-XX-----CA1D3D4Co5C6Co7016VI551\_Copelatus\_016VI551\_NCB1  
--X-----X-XX-----CA1D3D4Co5C6Co7008VI529\_Copelatus\_008VI529\_NCB1  
--X-----X-XX-----CA1D3D4Co5C6Co7012VI547\_Copelatus\_012VI547\_NCB1  
--X-----X-----XX-----CA1D3D4Co5C6Co7001VI497\_Copelatus\_001VI497\_NCB1  
--X-----X-XX-----CA1D3D4Co5C6Co7001VI500\_Copelatus\_001VI500\_NCB1  
--X-----X-XX-----CA1D3D4Co5C6Co7001VI496\_Copelatus\_001VI496\_NCB1  
--X-----X-----CA1D3D4Co5C6Co7010VI535\_Copelatus\_010VI535\_NCB1  
--X-----X-XX-----CA1D3D4Co5C6Co7001VI498\_Copelatus\_001VI498\_NCB1  
--X-----X-XX-----CA1D3D4Co5C6Co7010VI533\_Copelatus\_010VI533\_NCB1  
--X-----X-XX-----CA1D3D4Co5C6Co7001VI501\_Copelatus\_001VI501\_NCB1  
--X-----X-XX-----CA1D3D4Co5C6Co7006VI518\_Copelatus\_006VI518\_NCB1  
--X-----X-XX-----CA1D3D4Co5C6Co7001VI494\_Copelatus\_001VI494\_NCB1  
--X-----X-XX-----CA1D3D4Co5C6Co7001VI495\_Copelatus\_001VI495\_NCB1  
--X-----X-XX-----CA1D3D4Co5C6Co7001VI495\_Copelatus\_001VI495\_NCB1  
--X-----X-XX-----CA1D3D4Co5C6Co7003VI515\_Copelatus\_003VI515\_NCB1  
--X-----X-XX-----CA1D3D4Co5C6Co7016VI552\_Copelatus\_016VI552\_NCB1  
--X-----X-XX-----CA1D3D4Co5C6Co7015VI547\_Copelatus\_015VI547\_NCB1  
--X-----X-XX-----CA1D3D4Co5C6Co7010VI537\_Copelatus\_010VI537\_NCB1  
--X-----X-XX-----CA1D3D4Co5C6Co7031KA601\_Copelatus\_031KA601\_NCB1  
--X-----X-XX-----CA1D3D4Co5C6Co7031KA600\_Copelatus\_031KA600\_NCB1  
--X-----X-XX-----CA1D3D4Co5C6Co7031KA602\_Copelatus\_031KA602\_NCB1  
--X-----X-XX-----CA1D3D4Co5C6Co7013VI604\_Copelatus\_013VI604\_NCB1  
--X-----X-XX-----CA1D3D4Co5C6Co7031KA603\_Copelatus\_031KA603\_NCB1  
--X-----X-XX-----CA1D3D4Co5C6Co7002VI502\_Copelatus\_002VI502\_NCB1  
--X-----X-XX-----CA1D3D4Co5C6Co7016VI549\_Copelatus\_016VI549\_NCB1  
--X-----X-XX-----CA1D3D4Co5C6Co7002VI504\_Copelatus\_002VI504\_NCB1  
--X-----X-XX-----CA1D3D4Co5C6Co7014VI546\_Copelatus\_014VI546\_NCB1  
--X-----X-XX-----CA1D3D4Co5C6Co7009VI532\_Copelatus\_009VI532\_NCB1  
--X-----X-XX-----CA1D3D4Co5C6Co7016VI550\_Copelatus\_016VI550\_NCB1  
--X-----X-XX-----CA1D3D4Co5C6Co7012VI544\_Copelatus\_012VI544\_NCB1  
--X-----X-XX-----CA1D3D4Co5C6Co7010VI536\_Copelatus\_010VI536\_NCB1  
--X-----X-XX-----CA1D3D4Co5C6Co7003VI514\_Copelatus\_003VI514\_NCB1  
--X-----X-XX-----CA1D3D4Co5C6Co7014VI545\_Copelatus\_014VI545\_NCB1  
--X-----X-XX-----CA1D3D4Co5C6Co7003VI513\_Copelatus\_003VI513\_NCB1  
--X-----X-XX-----CA1D3D4Co5C6Co7008VI527\_Copelatus\_008VI527\_NCB1  
--X-----X-XX-----CA1D3D4Co5C6Co7008VI526\_Copelatus\_008VI526\_NCB1



```

-X-----X-----CA1D3D4Co5C6Co7034LA697_Copelatus_034LA697_NCBI
-X-----X-XX-----CA1D3D4Co5C6Co7020VA565_Copelatus_020VA565_NCBI
-X-----X-XX-----CA1D3D4Co5C6Co7034LA699_Copelatus_034LA699_NCBI
-X-----X-XX-----CA1D3D4Co5C6Co7021VA567_Copelatus_021VA567_NCBI
-X-----X-XX-----CA1D3D4Co5C6Co7026VA577_Copelatus_026VA577_NCBI
-X-----X-XX-----CA1D3D4Co5C6Co7026VA576_Copelatus_026VA576_NCBI
-X-----X-XX-----CA1D3D4Co5C6Co7021VA568_Copelatus_021VA568_NCBI
-X-----X-XX-----CA1D3D4Co5C6Co7019VA562_Copelatus_019VA562_NCBI
-X-----X-XX-----CA1D3D4Co5C6Co7029TA591_Copelatus_029TA591_NCBI
-X-----X-XX-----CA1D3D4Co5C6Co7030VA596_Copelatus_030VA596_NCBI
-X-----X-XX-----CA1D3D4Co5C6Co7025VA574_Copelatus_025VA574_NCBI
-X-----X-XX-----CA1D3D4Co5C6Co7013VI606_Copelatus_013VI606_NCBI
-X-----X-XX-----CA1D3D4Co5C6Co7028TA588_Copelatus_028TA588_NCBI
-X-----X-XX-----CA1D3D4Co5C6Co7028TA585_Copelatus_028TA585_NCBI
-X-----X-XX-----CA1D3D4Co5C6Co7013VI607_Copelatus_013VI607_NCBI
-X-----X-XX-----CA1D3D4Co5C6Co7008VI530_Copelatus_008VI530_NCBI
-X-----X-XX-----CA1D3D4Co5C6Co7008VI525_Copelatus_008VI525_NCBI
-X-----X-XX-----CA1D3D4Co5C6Co7008VI524_Copelatus_008VI524_NCBI
-X-----X-XX-----CA1D3D4Co5C6Co7015VI548_Copelatus_015VI548_NCBI
-X-----X-XX-----CA1D3D4Co5C6Co7012VI543_Copelatus_012VI543_NCBI
-X-----X-----CA1D3D4Co5C6Co7030VA598_Copelatus_030VA598_NCBI
-X-----X-XX-----CA1D3D4Co5C6Co7002VI507_Copelatus_002VI507_NCBI
-X-----X-XX-----CA1D3D4Co5C6Co7006VI520_Copelatus_006VI520_NCBI
-X-----X-XX-----CA1D3D4Co5C6Co7006VI516_Copelatus_006VI516_NCBI
-X-----X-XX-----CA1D3D4Co5C6Co7002VI510_Copelatus_002VI510_NCBI
-X-----X-XX-----CA1D3D4Co5C6Co7002VI509_Copelatus_002VI509_NCBI
-X-----X-XX-----CA1D3D4Co5C6Co7001VI499_Copelatus_001VI499_NCBI
-X-----X-XX-----CA1D3D4Co5C6Co7029TA593_Copelatus_029TA593_NCBI
-X-----X-XX-----CA1D3D4Co5C6Co7027TA584_Copelatus_027TA584_NCBI
-X-----X-XX-----CA1D3D4Co5C6Co7027TA582_Copelatus_027TA582_NCBI
-X-----X-XX-----CA1D3D4Co5C6Co7028TA587_Copelatus_028TA587_NCBI
-X-----X-XX-----CA1D3D4Co5C6Co7028TA590_Copelatus_028TA590_NCBI
-X-----X-----CA1D3D4Co5C6Co7028TA589_Copelatus_028TA589_NCBI
-X-----X-XX-----CA1D3D4Co5C6Co7028TA586_Copelatus_028TA586_NCBI
-X-----X-XX-----CA1D3D4Co5C6Co7027TA581_Copelatus_027TA581_NCBI
-X-----X-XX-----CA1D3D4Co5C6Co7029TA594_Copelatus_029TA594_NCBI
-X-----X-XX-----CA1D3D4Co5C6Co7023VA572_Copelatus_023VA572_NCBI
-X-----X-XX-----CA1D3D4Co5C6Co7023VA573_Copelatus_023VA573_NCBI
-X-----X-XX-----CA1D3D4Co5C6Co7019VA564_Copelatus_019VA564_NCBI
-X-----X-XX-----CA1D3D4Co5C6Co7019VA563_Copelatus_019VA563_NCBI
-X-----X-XX-----CA1D3D4Co5C6Co7026VA579_Copelatus_026VA579_NCBI
-X-----X-XX-----CA1D3D4Co5C6Co7019VA561_Copelatus_019VA561_NCBI
-X-----X-XX-----CA1D3D4Co5C6Co7026VA580_Copelatus_026VA580_NCBI
-X-----X-XX-----CA1D3D4Co5C6Co7020VA566_Copelatus_020VA566_NCBI
-X-----X-XX-----CA1D3D4Co5C6Co7018VA556_Copelatus_018VA556_NCBI
-X-----X-XX-----CA1D3D4Co5C6Co7026VA578_Copelatus_026VA578_NCBI
-X-----X-XX-----CA1D3D4Co5C6Co7018VA557_Copelatus_018VA557_NCBI
-X-----X-XX-----CA1D3D4Co5C6Co7030VA597_Copelatus_030VA597_NCBI
-X-----X-XX-----CA1D3D4Co5C6Co7030VA599_Copelatus_030VA599_NCBI
-X-----X-XX-----CA1D3D4Co5C6Co7018VA555_Copelatus_018VA555_NCBI
-X-----X-XX-----CA1D3D4Co5C6Co7018VA560_Copelatus_018VA560_NCBI
-X-----X-XX-----CA1D3D4Co5C6Co7018VA558_Copelatus_018VA558_NCBI
-X-----X-XX-----CA1D3D4M5M6A17nan Allomatus_nannup_NCBI
-XXX-XX-----CA1D3D4M5M6Ba7dae_Batrachomatus_daemeli_NCBI
-X-----X-XX-----CA1D3D4M5M6Ba7win_Batrachomatus_wingii_NCBI
-XXX-X-----CA1D3D4L5A6Ag7acu_Agabates_acuductus_NCBI
-X-----X-----X_CA1D3D4L5L6AF7BI2011_1_Africophilus_BI2011_NCBI
-XX-----X-----X_CA1D3D4L5L6AF7pau_Africophilus_pauliani_NCBI
-X-----X-----CA1D3D4L5L6AF7mes_Africophilus_mesotes_NCBI
-X-----X-----X_CA1D3D4L5L6AF7681814_Africophilus_681814_NCBI
-X-----X-----X_CA1D3D4L5L6AF7BI2011_3_Africophilus_BI2011_NCBI
-X-----X-----X_CA1D3D4L5L6AF7BI2011_4_Africophilus_BI2011_NCBI
-X-----X-----CA1D3D4L5L6AF7BI2011_Africophilus_BI2011_NCBI
-X-----X-----X_CA1D3D4L5L6AF7BI2011_2_Africophilus_BI2011_NCBI
-XX-----X-----X_CA1D3D4L5L6La7all_Laccophilus_alluaudi_NCBI
-XX-----X-----X_CA1D3D4L5L6La7com_Laccophilus_comes_NCBI
-X-----X-----XX-X-CA1D3D4L5L6La7MB1176_Laccophilus_MB1176_NCBI
-X-----X-----X-CA1D3D4L5L6La7MB1175_Laccophilus_MB1175_NCBI
-XX-----X-----X-CA1D3D4L5L6La7hor_Laccophilus_horni_NCBI
-X-----X-----XX-XXX-CA1D3D4L5L6La7pic_Laccophilus_pictus_NCBI
-XX-----X-----XX-CA1D3D4L5L6La7mac_Laccophilus_maculosus_NCBI
-XX-----X-----XX-CA1D3D4L5L6La7hya_Laccophilus_hyalinus_NCBI
-XX-----X-----XXX-CA1D3D4L5L6Phl7umb_Philodytes_umbrinus_NCBI
-X-----X-----X-CA1D3D4L5L6La7comp_Laccophilus_complicatus_NCBI
-XX-----X-----X-CA1D3D4L5L6La7pos_Laccophilus_posticus_NCBI
-X-----X-----XX-CA1D3D4L5L6La7poo_Laccophilus_ponticus_NCBI
XXXXXXXXXXXX-XX-CA1D3D4L5L6La7poe_Laccophilus_poecilus_ameie.idba.8_MERGED_MMG_ANNOT_FROM_BARCODE
-X-----X-----X-CA1D3D4L5L6La7lat_Laccophilus_lateralis_NCBI
-X-----X-----X-CA1D3D4L5L6La7lac_Laccophilus_lacuosus_NCBI
-X-----X-----X-CA1D3D4L5L6La7ino_Laccophilus_inornatus_NCBI
-X-----X-----X-CA1D3D4L5L6La7BI2011_Laccophilus_BI2011_NCBI
-XX-----X-----X-CA1D3D4L5L6La7pal_Laccophilus_pallescens_NCBI
-X-----X-----X-CA1D3D4L5L6La7fta_Laccophilus_flaveolus_NCBI
-XX-----X-----X-CA1D3D4L5L6La7MB2014_Laccophilus_MB2014_NCBI
-X-----X-----X-CA1D3D4L5L6La7MTM2009_1_Laccophilus_MTM2009_NCBI
-X-----X-----X-CA1D3D4L5L6La7add_Laccophilus_addendus_NCBI
-X-----X-----XX-CA1D3D4L5L6La7MB1170_Laccodytes_MB1170_NCBI
-XX-----X-----XXX-CA1D3D4L5L6Au7sal_Australphilus_saltus_NCBI
-X-----X-----XX-XX-CA1D3D4L5L6Au7mon_Australphilus_montanus_NCBI
-X-----X-----X-CA1D3D4L5L6Ph7BI2011_Philaccolus_BI2011_NCBI
-XX-----X-----X-CA1D3D4L5L6Ph7MB366_Philaccolus_MB366_NCBI
-X-----X-----XX-X-CA1D3D4L5L6Ph7be1_Philaccolus_bellissimus_NCBI
-X-----X-----XX-X-CA1D3D4L5L6Ph7mek_Philaccolus_mekus_NCBI
-X-----X-----XX-X-CA1D3D4L5L6Ph7iri_Philaccolus_irianensis_NCBI
-XX-----X-----XXX-CA1D3D4L5L6Ne7KBMnrsp379_Neptosternus_KBMnrsp379_NCBI
-XX-----X-----XX-CA1D3D4L5L6Ne7BMNH834445_Neptosternus_BMNH834445_NCBI
-X-----X-----X-CA1D3D4L5L6Ne7obl_Neptosternus_oblongus_NCBI
-X-----X-----XX-X-CA1D3D4L5L6Ne7hyd_Neptosternus_hydaticoides_NCBI
-X-----X-----XX-X-CA1D3D4L5L6Ne7681957_Neptosternus_681957_NCBI
-XXX-----XXX-XX-CA1D3D4S6C6S07lat_Spencerhydrus_latecinctus_NCBI

```

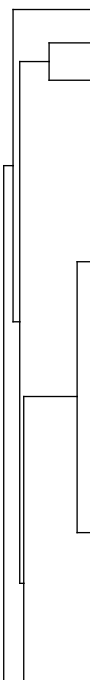

Phylogenetic tree showing relationships between various species. The tree is rooted on the left and branches out to the right. Species names and their corresponding accession numbers are listed on the right side of the tree. The species names are often followed by their NCBI accession numbers. The tree shows a complex branching pattern, with many species having multiple accessions. The species names are often followed by their NCBI accession numbers. The tree shows a complex branching pattern, with many species having multiple accessions. The species names are often followed by their NCBI accession numbers. The tree shows a complex branching pattern, with many species having multiple accessions. The species names are often followed by their NCBI accession numbers.

Species names and accession numbers listed on the right side of the tree:

- CA1D3D4D5C6Sp7puL\_Spencerhydrus\_pulchellus NCBI
- CA1D3D4D5C6Au7pla\_Auistrodytes\_plateni NCBI
- CA1D3D4D5C6St7atr\_Sternhydrus\_atratus NCBI
- CA1D3D4D5C6on7lar\_Onychohydrus\_larva NCBI
- CA1D3D4D5C6St7scu\_Sternhydrus\_scutellaris NCBI
- CA1D3D4D5C6Me7681313\_Megadytes\_681313 NCBI
- CA1D3D4D5C6Me7lae\_Megadytes\_laevigatus NCBI
- CA1D3D4D5C6Me7fra\_Megadytes\_fratratus NCBI
- CA1D3D4D5C6Me7car\_Megadytes\_carchariae NCBI
- CA1D3D4D5C6Me7IR98\_Megadytes\_IR98 NCBI
- CA1D3D4D5C6Me7rob\_Megadytes\_robustus NCBI
- CA1D3D4D5C6Me7aus\_Megadytes\_australis NCBI
- CA1D3D4D5C6Me7IR99\_Megadytes\_IR99 NCBI
- CA1D3D4D5C6Me7IR57\_Megadytes\_IR57 NCBI
- CA1D3D4D5C6Cy7gue\_Cybister\_guerini NCBI
- CA1D3D4D5C6Cy7ven\_Cybister\_ventralis NCBI
- CA1D3D4D5C6Cy7cog\_Cybister\_cognatus NCBI
- CA1D3D4D5C6Cy7KBMcyp757\_Cybister\_KBMCyp757 NCBI
- CA1D3D4D5C6Cy7pun\_Cybister\_puncticolis NCBI
- CA1D3D4D5C6Cy7car\_Cybister\_cardoni NCBI
- CA1D3D4D5C6Cy7fim\_Cybister\_fimbriolatus NCBI
- CA1D3D4D5C6Cy7exp\_Cybister\_explanatus NCBI
- CA1D3D4D5C6Cy7gui\_Cybister\_guignoti NCBI
- CA1D3D4D5C6Cy7sen\_Cybister\_senegalensis NCBI
- CA1D3D4D5C6Cy7jap\_Cybister\_japonicus NCBI
- CA1D3D4D5C6Cy7lat\_Cybister\_lateralimarginalis NCBI
- CA1D3D4D5C6Cy7tri\_Cybister\_tripunctatus NCBI
- CA1D3D4D5C6Cy7tib\_Cybister\_tibialis NCBI
- CA1D3D4D5C6Cy7gsc\_Cybister\_gschwendneri NCBI
- CA1D3D4D5C6Cy7cin\_Cybister\_cinctus NCBI
- CA1D3D4D5C6Me7mar\_Megadytes\_marginitorax NCBI
- CA1D3D4D5C6Me7gla\_Megadytes\_glaucus NCBI
- CA1D3D4D5C6Cy7mar\_Cybister\_marginicollis NCBI
- CA1D3D4D5C6Cy7imm\_Cybister\_immarginatus NCBI
- CA1D3D4D5C6Cy7sug\_Cybister\_sugillatus NCBI
- CA1D3D4D5C6Cy7con\_Cybister\_convexus NCBI
- CA1D3D4D5C6Cy7vic\_Cybister\_vicinus NCBI
- CA1D3D4D5C6Cy7pos\_Cybister\_posticus NCBI
- CA1D3D4D5C6Cy7owa\_Cybister\_owas NCBI
- CA1D3D4D5C6Cy7bre\_Cybister\_brevis NCBI
- CA1D3D4D5C6Cy7ope\_Cybister\_operosus NCBI
- CA1D3D4D5C6Cy7vul\_Cybister\_vulneratus NCBI
- CA1D3D4H5H6Hy7MB313\_Hydrodytes\_MB313 NCBI
- CA1D3D4H5H6Hy7opa\_Hydrodytes\_opalinus NCBI
- CA1D3D4Co5C6Co7kal\_Copelatus\_kalaharii NCBI
- CA1D3D4Co5C6Co7che\_Copelatus\_chevrolati NCBI
- CA1D3D4Co5C6Co7IR321\_Copelatus\_IR321 NCBI
- CA1D3D4H5H6Hy7len\_Derovatellus\_lentus NCBI
- CA1D3D4Co5C6Me7BMBH31338\_Madaglymbus\_BMBH31338 NCBI
- CA1D3D4H5H6Hy7per\_Derovatellus\_peruanus NCBI
- CA1D3D4H5H6Va7NHMIR101\_Vatellus\_NHMIR101 NCBI
- CA1D3D4H5H6Va7NHMIR113\_Vatellus\_NHMIR113 NCBI
- CA1D3D4H5Hyp6Pa7glo\_Pachydrus\_globosus NCBI
- CA1D3D4H5Hyp6Pa7KBMpasp761\_Pachydrus\_KBMPasp761 NCBI
- CA1D3D4H5Hyp6Pa7IR2007\_Pachydrus\_IR2007 NCBI
- CA1D3D4H5Hyp6Pa7pol\_Pachydrus\_politus NCBI
- CA1D3D4H5Hyp6Qu7you\_Queda\_youngi NCBI
- CA1D3D4H5H6Hy7cly\_Hydrovatus\_clypealis NCBI
- CA1D3D4H5H6Hy7pic\_Hydrovatus\_pictulus NCBI
- CA1D3D4H5H6Hy7dav\_Hydrovatus\_davidis NCBI
- CA1D3D4H5H6Hy7pus\_Hydrovatus\_pustulatus NCBI
- CA1D3D4H5H6Hy7tes\_Hydrovatus\_testudinarius NCBI
- CA1D3D4H5H6Hy7oti\_Hydrovatus\_otiosus NCBI
- CA1D3D4H5H6Hy7par\_Hydrovatus\_parvulus NCBI
- CA1D3D4H5H6Hy7acu\_Hydrovatus\_acuminatus NCBI
- CA1D3D4H5H6Hy7para\_Hydrovatus\_parallelipennis NCBI
- CA1D3D4H5H6Hy7fra\_Hydrovatus\_fratr NCBI
- CA1D3D4H5H6Hy7nig\_Hydrovatus\_nigrita NCBI
- CA1D3D4H5H6Hy7ruf\_Hydrovatus\_rufoniger NCBI
- CA1D3D4H5H6Hy7obl\_Hydrovatus\_oblongipennis NCBI
- CA1D3D4H5H6Hy7nigr\_Hydrovatus\_nigricans NCBI
- CA1D3D4H5L6La7obl\_Laccornis\_oblongus NCBI
- CA1D3D4H5L6La7koc\_Laccornis\_kocae NCBI
- CA1D3D4H5L6La7dif\_Laccornis\_difformis NCBI
- CA1D3D4H5H6La7lug\_Laccornellus\_lugubris NCBI
- CA1D3D4H5H6La7cop\_Laccornellus\_copelatooides NCBI
- CA1D3D4H5H6An7got\_Antiporus\_gottwaldi NCBI
- CA1D3D4H5H6Sa7ter\_Santippodytes\_terminalis NCBI
- CA1D3D4H5H6Neo7VLS1999\_Neoporus\_VLS1999 NCBI
- CA1D3D4H5H6Sa7IR2002\_Santippodytes\_IR2002 NCBI
- CA1D3D4H5H6Sa7KBM2014\_Santippodytes\_KBM2014 NCBI
- CA1D3D4H5H6Neo7mel\_Neoporus\_melittus NCBI
- CA1D3D4H5H6Ha7tex\_Haideoporus\_texanus NCBI
- CA1D3D4H5H6He7pul\_Heterosternuta\_pulcher NCBI
- CA1D3D4H5H6Neo7und\_Neoporus\_undulatus NCBI
- CA1D3D4H5H6Neo7sol\_Neoporus\_solitarius NCBI
- CA1D3D4H5H6Neo7ari\_Neoporus\_arizonicus NCBI
- CA1D3D4H5H6Hyd7pau\_Hydrocolus\_paugus NCBI
- CA1D3D4H5H6Hyd7sah\_Hydrocolus\_sahlbergi NCBI
- CA1D3D4H5H6Hyd7pic\_Hydrocolus\_picicornis NCBI
- CA1D3D4H5H6Su7fig\_Suphrodytes\_figuratus NCBI
- CA1D3D4H5H6Sudor\_Suphrodytes\_dorsalis NCBI
- CA1D3D4H5H6Hy7sub\_Hydroporus\_submuticus NCBI
- CA1D3D4H5H6Hy7ruf\_Hydroporus\_rufifrons NCBI
- CA1D3D4H5H6Hy7ves\_Hydroporus\_vespertinus NCBI
- CA1D3D4H5H6Hy7ery\_Hydroporus\_erythrocephalus NCBI
- CA1D3D4H5H6Hy7IRC37\_Hydroporus\_IRC37 NCBI
- CA1D3D4H5H6Hy7tran\_Hydroporus\_transpunctatus NCBI
- CA1D3D4H5H6Hy7elo\_Hydroporus\_elongatus NCBI
- CA1D3D4H5H6Hy7che\_Hydroporus\_cheurusi NCBI

CA1D3D4H5H6Hy7pag\_Hydroporus\_paganettianus\_NCB1  
CA1D3D4H5H6Hy7lap\_Hydroporus\_laponum\_NCB1  
CA1D3D4H5H6Hy7for\_Hydroporus\_fortis\_NCB1  
CA1D3D4H5H6Hy7axi\_Hydroporus\_axillaris\_NCB1  
CA1D3D4H5H6Hy7IRC36\_Hydroporus\_IRC36\_NCB1  
CA1D3D4H5H6Hy7nig\_Hydroporus\_niger\_NCB1  
CA1D3D4H5H6Hy7sin\_Hydroporus\_sinuatipes\_NCB1  
CA1D3D4H5H6Hy7not\_Hydroporus\_notabilis\_NCB1  
CA1D3D4H5H6Hy7mor\_Hydroporus\_morisii\_NCB1  
CA1D3D4H5H6Hy7sem\_Hydroporus\_semenowi\_NCB1  
CA1D3D4H5H6Hy7gen\_Hydroporus\_geniculatus\_NCB1  
CA1D3D4H5H6Hy7nige\_Hydroporus\_nigellus\_NCB1  
CA1D3D4H5H6Hy7subp\_Hydroporus\_subpubescens\_NCB1  
CA1D3D4H5H6Hy7IR325\_Hydroporus\_IR325\_NCB1  
CA1D3D4H5H6Hy7des\_Hydroporus\_despectus\_NCB1  
CA1D3D4H5H6Hy7car\_Hydroporus\_carri\_NCB1  
CA1D3D4H5H6Hy7hir\_Hydroporus\_hirtellus\_NCB1  
CA1D3D4H5H6Hy7IR232\_Hydroporus\_IR232\_NCB1  
CA1D3D4H5H6Hy7per\_Hydroporus\_pervicinus\_NCB1  
CA1D3D4H5H6Hy7IR334\_Hydroporus\_IR334\_NCB1  
CA1D3D4H5H6Hy7occ\_Hydroporus\_occidentalis\_NCB1  
CA1D3D4H5H6Hy7app\_Hydroporus\_appalachius\_NCB1  
CA1D3D4H5H6Hy7man\_Hydroporus\_mannerheimi\_NCB1  
CA1D3D4H5H6Hy7neg\_Hydroporus\_neglectus\_NCB1  
CA1D3D4H5H6Hy7sca\_Hydroporus\_scalesianus\_NCB1  
CA1D3D4H5H6Hy7ang\_Hydroporus\_angustatus\_NCB1  
CA1D3D4H5H6Hy7pube\_Hydroporus\_puberulus\_NCB1  
CA1D3D4H5H6Hy7gla\_Hydroporus\_glabriusculus\_NCB1  
CA1D3D4H5H6Hy7umb\_Hydroporus\_umbrosus\_NCB1  
CA1D3D4H5H6Hy7bre\_Hydroporus\_brevis\_NCB1  
CA1D3D4H5H6Hy7mar\_Hydroporus\_marginatus\_NCB1  
CA1D3D4H5H6Hy7fus\_Hydroporus\_fuscipennis\_NCB1  
CA1D3D4H5H6Hy7acu\_Hydroporus\_acutangulus\_NCB1  
CA1D3D4H5H6Hy7Kab\_Hydroporus\_kabakovi\_NCB1  
XXXXXXXXXXXXX CA1D3D4H5H6Hy7pla\_Hydroporus\_planus\_1VWB.idba.2\_MERGED\_MMG\_ANNOT\_FROM\_BARCODE  
CA1D3D4H5H6Hy7gol\_Hydroporus\_goldschmidti\_NCB1  
CA1D3D4H5H6Hy7luc\_Hydroporus\_lucasi\_NCB1  
CA1D3D4H5H6Hy7lim\_Hydroporus\_limbatu\_NCB1  
CA1D3D4H5H6Hy7pil\_Hydroporus\_pilosus\_NCB1  
CA1D3D4H5H6Hy7com\_Hydroporus\_compunctus\_NCB1  
CA1D3D4H5H6Hy7ana\_Hydroporus\_analis\_NCB1  
CA1D3D4H5H6Hy7dec\_Hydroporus\_decipiens\_NCB1  
XXXXXXXXXXXXX CA1D3D4H5H6Hy7dis\_Hydroporus\_discretus\_1VWB.idba.14\_MERGED\_MMG\_ANNOT\_FROM\_BARCODE  
CA1D3D4H5H6Hy7err\_Hydroporus\_errans\_NCB1  
CA1D3D4H5H6Hy7bran\_Hydroporus\_branuccii\_NCB1  
CA1D3D4H5H6Hy7mac\_Hydroporus\_macedonicus\_NCB1  
XXXXXXXXXXXXX CA1D3D4H5H6Hy7spi\_Hydroporus\_spi\_1VWB.idba.19\_MMG\_ANNOT\_FROM\_BARCODE  
CA1D3D4H5H6Hy7zim\_Hydroporus\_zimmermanni\_NCB1  
CA1D3D4H5H6Hy7fov\_Hydroporus\_foveolatus\_NCB1  
CA1D3D4H5H6Hy7bas\_Hydroporus\_basiniotatus\_NCB1  
CA1D3D4H5H6Hy7tes\_Hydroporus\_tessellatus\_NCB1  
CA1D3D4H5H6Hy7pub\_Hydroporus\_pubescens\_NCB1  
CA1D3D4H5H6Hy7thr\_Hydroporus\_thracicus\_NCB1  
CA1D3D4H5H6Hy7koz\_Hydroporus\_kozlovskii\_NCB1  
CA1D3D4H5H6Hy7nigr\_Hydroporus\_nigrita\_NCB1  
CA1D3D4H5H6Hy7sab\_Hydroporus\_sabaudus\_NCB1  
XXXXXXXXXXXXX CA1D3D4H5H6Hy7gyl\_Hydroporus\_gyllenhalii\_1VWB.idba.4\_MERGED\_MMG\_ANNOT\_FROM\_BARCODE  
CA1D3D4H5H6Hy7MM2014\_Hydroporus\_MM2014\_NCB1  
CA1D3D4H5H6Hy7IRC42\_Hydroporus\_IRC42\_NCB1  
CA1D3D4H5H6Hy7IR324\_Hydroporus\_IR324\_NCB1  
CA1D3D4H5H6Hy7tri\_Hydroporus\_tristis\_NCB1  
CA1D3D4H5H6Hy7inc\_Hydroporus\_incongruus\_NCB1  
CA1D3D4H5H6Hy7str\_Hydroporus\_striola\_NCB1  
CA1D3D4H5H6Hy7IRTW1\_Hydroporus\_IRTW1\_NCB1  
CA1D3D4H5H6Hy7spr\_Hydroporus\_springeri\_NCB1  
CA1D3D4H5H6Hy7inco\_Hydroporus\_incommodus\_NCB1  
CA1D3D4H5H6Hy7jon\_Hydroporus\_jonicus\_NCB1  
XXXXXXXXXXXXX CA1D3D4H5H6Hy7pal\_Hydroporus\_palustris\_JX313670\_MERGED  
CA1D3D4H5H6Hy7vag\_Hydroporus\_vagepictus\_NCB1  
CA1D3D4H5H6Hy7obso\_Hydroporus\_obsoletus\_NCB1  
CA1D3D4H5H6Hy7san\_Hydroporus\_santillanensis\_NCB1  
CA1D3D4H5H6Hy7fer\_Hydroporus\_ferugineus\_NCB1  
CA1D3D4H5H6Hy7IR2011\_Hydroporus\_IR2011\_NCB1  
CA1D3D4H5H6Hy7nec\_Hydroporus\_necopinatus\_NCB1  
CA1D3D4H5H6Hy7heb\_Hydroporus\_hebaueri\_NCB1  
CA1D3D4H5H6Hy7mel\_Hydroporus\_melanarius\_NCB1  
CA1D3D4H5H6Hy7long\_Hydroporus\_longicornis\_NCB1  
CA1D3D4H5H6Hy7llu\_Hydroporus\_lluci\_NCB1  
CA1D3D4H5H6Hy7nor\_Hydroporus\_normandi\_NCB1  
CA1D3D4H5H6Hy7mem\_Hydroporus\_memnonius\_NCB1  
CA1D3D4H5H6Hy7can\_Hydroporus\_cantabricus\_NCB1  
CA1D3D4H5H6Hy7bra\_Hydroporus\_brancoi\_NCB1  
CA1D3D4H5H6Hy7sar\_Hydroporus\_sardomontanus\_NCB1  
CA1D3D4H5H6Hy7lon\_Hydroporus\_longulus\_NCB1  
CA1D3D4H5H6Hy7ape\_Hydroporus\_apenninus\_NCB1  
CA1D3D4H5H6Hy7cup\_Hydroporus\_cuprescens\_NCB1  
CA1D3D4H5H6Hy7bod\_Hydroporus\_bodemeyeri\_NCB1  
CA1D3D4H5H6Hy7kra\_Hydroporus\_kraatzii\_NCB1  
CA1D3D4H5H6Hy7nev\_Hydroporus\_nevadensis\_NCB1  
CA1D3D4H5H6Hy7gue\_Hydroporus\_gueorguievi\_NCB1  
CA1D3D4H5H6Hy7AI62\_23408\_Hydroporus\_AI62\_23408\_NCB1  
CA1D3D4H5H6Hy7reg\_Hydroporus\_regularis\_NCB1  
CA1D3D4H5H6Hy7dob\_Hydroporus\_dobrogeanus\_NCB1  
CA1D3D4H5H6Hy7con\_Hydroporus\_constantinus\_NCB1  
CA1D3D4H5H6Hy7fel\_Psychopomporus\_felipi\_NCB1  
CA1D3D4H5H6Rh7sex\_Rhithrodytes\_sexguttatus\_NCB1  
CA1D3D4H5H6Rh7num\_Rhithrodytes\_numidicus\_NCB1  
CA1D3D4H5H6Rh7cru\_Rhithrodytes\_cruces\_NCB1  
CA1D3D4H5H6Rh7bim\_Rhithrodytes\_bimaculatus\_NCB1

Phylogenetic tree showing relationships between various species, with bootstrap values indicated by 'X' marks. The tree is rooted on the left and branches out to the right. The species names are listed on the right side of the tree, often followed by their NCBI accession numbers. The bootstrap values are represented by 'X' marks at the nodes of the tree.

Species listed include:

- CA1D3D4H5H6Kn7agn\_Mnitrocytes\_agnus\_NCBI
- CA1D3D4H5H6Ib7ceF\_Iberoporus\_cermenius\_NCBI
- CA1D3D4H5H6Po7lin\_Porhydrus\_lineatus\_NCBI
- CA1D3D4H5H6Po7gen\_Porhydrus\_genei\_NCBI
- CA1D3D4H5H6Po7vic\_Porhydrus\_vicinus\_NCBI
- CA1D3D4H5H6St7lep\_Stictonectes\_lepidus\_NCBI
- CA1D3D4H5H6St7esc\_Stictonectes\_escheri\_NCBI
- CA1D3D4H5H6St7PA313\_Stictonectes\_PA313\_NCBI
- CA1D3D4H5H6St7PA312\_Stictonectes\_PA312\_NCBI
- CA1D3D4H5H6St7ruf\_Stictonectes\_rufulus\_NCBI
- CA1D3D4H5H6St7sam\_Stictonectes\_sama\_NCBI
- CA1D3D4H5H6St7can\_Stictonectes\_canariensis\_NCBI
- CA1D3D4H5H6St7opt\_Stictonectes\_optatus\_NCBI
- CA1D3D4H5H6St7azr\_Stictonectes\_azruensis\_NCBI
- CA1D3D4H5H6St7epi\_Stictonectes\_epipleuricus\_NCBI
- CA1D3D4H5H6St7MNCNAH72\_Stictonectes\_MNCNAH72\_NCBI
- CA1D3D4H5H6St7occ\_Stictonectes\_occidentalis\_NCBI
- CA1D3D4H5H6Er7nat\_Ereboporus\_naturaconservatus\_NCBI
- CA1D3D4H5H6Me7mer\_Metaporus\_meridionalis\_NCBI
- CA1D3D4H5H6Po7KBMPOsp754\_Porhydrus\_KBMPOsp754\_NCBI
- CA1D3D4H5H6Gr7fla\_Graptodytes\_flavipes\_NCBI
- CA1D3D4H5H6Gr7vet\_Graptodytes\_veteris\_NCBI
- CA1D3D4H5H6Gr7bil\_Graptodytes\_bilineatus\_NCBI
- CA1D3D4H5H6Gr7sed\_Graptodytes\_sedilloti\_NCBI
- CA1D3D4H5H6Gr7gra\_Graptodytes\_granularis\_NCBI
- CA1D3D4H5H6Gr7pic\_Graptodytes\_pictus\_NCBI
- CA1D3D4H5H6Gr7aeq\_Graptodytes\_aequalis\_NCBI
- CA1D3D4H5H6Gr7cas\_Graptodytes\_castilianus\_NCBI
- CA1D3D4H5H6Gr7sic\_Graptodytes\_siculus\_NCBI
- CA1D3D4H5H6Gr7pie\_Graptodytes\_pietrii\_NCBI
- CA1D3D4H5H6Gr7atl\_Graptodytes\_atlantis\_NCBI
- CA1D3D4H5H6Gr7ere\_Graptodytes\_eremitus\_NCBI
- CA1D3D4H5H6Gr7del\_Graptodytes\_delectus\_NCBI
- CA1D3D4H5H6Gr7kuc\_Graptodytes\_kuchtae\_NCBI
- CA1D3D4H5H6Gr7var\_Graptodytes\_varius\_NCBI
- CA1D3D4H5H6Gr7fra\_Graptodytes\_fractus\_NCBI
- CA1D3D4H5H6Gr7ign\_Graptodytes\_ignotus\_NCBI
- CA1D3D4H5H6Se7krii\_Sekaliporus\_kriegi\_NCBI
- CA1D3D4H5H6T17tam\_Tiporus\_tambreyi\_NCBI
- CA1D3D4H5H6T17cen\_Tiporus\_centralis\_NCBI
- CA1D3D4H5H6T17jos\_Tiporus\_josepheni\_NCBI
- CA1D3D4H5H6T17lac\_Tiporus\_lachlani\_NCBI
- CA1D3D4H5H6T17jun\_Tiporus\_undecimaculatus\_NCBI
- CA1D3D4H5H6An7jen\_Antiporus\_jenniferae\_NCBI
- CA1D3D4H5H6T17cgl\_Tiporus\_collaris\_NCBI
- CA1D3D4H5H6An7hol\_Antiporus\_hollingsworthi\_NCBI
- CA1D3D4H5H6An7wil\_Antiporus\_wilsoni\_NCBI
- CA1D3D4H5H6An7bak\_Antiporus\_bakewellii\_NCBI
- CA1D3D4H5H6An7bla\_Antiporus\_blakeii\_NCBI
- CA1D3D4H5H6An7fem\_Antiporus\_femoralis\_NCBI
- CA1D3D4H5H6An7MB1421\_Antiporus\_MB1421\_NCBI
- CA1D3D4H5H6An7int\_Antiporus\_interrogationis\_NCBI
- CA1D3D4H5H6An7str\_Antiporus\_strigosulus\_NCBI
- CA1D3D4H5H6An7gil\_Antiporus\_gilbertii\_NCBI
- CA1D3D4H5H6Ch7joh\_Chostonectes\_johnsoni\_NCBI
- CA1D3D4H5H6Ch7neb\_Chostonectes\_nebulosus\_NCBI
- CA1D3D4H5H6Ch7sha\_Chostonectes\_sharpi\_NCBI
- CA1D3D4H5H6Ch7gig\_Chostonectes\_gigas\_NCBI
- CA1D3D4H5H6Meg7wil\_Megaporus\_wilsoni\_NCBI
- CA1D3D4H5H6Meg7nat\_Megaporus\_natvigi\_NCBI
- CA1D3D4H5H6Meg7ruf\_Megaporus\_rufipes\_NCBI
- CA1D3D4H5H6Meg7rufi\_Megaporus\_ruficeps\_NCBI
- CA1D3D4H5H6Meg7sol\_Megaporus\_solidus\_NCBI
- CA1D3D4H5H6Meg7how\_Megaporus\_howittii\_NCBI
- CA1D3D4H5H6Meg7gar\_Megaporus\_gardneri\_NCBI
- CA1D3D4H5H6Meg7ham\_Megaporus\_hamatus\_NCBI
- CA1D3D4H5H6Ne7sus\_Necterosoma\_susanna\_NCBI
- CA1D3D4H5H6Ne7reg\_Necterosoma\_regulare\_NCBI
- CA1D3D4H5H6Ne7pen\_Necterosoma\_penicillatum\_NCBI
- CA1D3D4H5H6Ne7dis\_Necterosoma\_dispar\_NCBI
- CA1D3D4H5H6Ne7und\_Necterosoma\_undecimlineatum\_NCBI
- CA1D3D4H5H6Ne7dar\_Necterosoma\_darwini\_NCBI
- CA1D3D4H5H6Ne7aph\_Necterosoma\_aphroditae\_NCBI
- CA1D3D4H5H6Ne7sch\_Necterosoma\_schmeltzi\_NCBI
- CA1D3D4H5H6Pa7cou\_Paroster\_couagesi\_NCBI
- CA1D3D4H5H6Pa7mic\_Paroster\_michaelsoni\_NCBI
- CA1D3D4H5H6Pa7nig\_Paroster\_nigroadumbratus\_NCBI
- CA1D3D4H5H6Pa7mel\_Paroster\_melroseensis\_NCBI
- CA1D3D4H5H6Pa7dar\_Paroster\_darlotensis\_NCBI
- CA1D3D4H5H6Pa7RL2008\_1\_Paroster\_RL2008\_NCBI
- CA1D3D4H5H6Pa7ins\_Paroster\_insculptilis\_NCBI
- CA1D3D4H5H6Pa7nige\_Paroster\_niger\_NCBI
- CA1D3D4H5H6Pa7pal\_Paroster\_pallescens\_NCBI
- CA1D3D4H5H6Pa7bay\_Paroster\_baylyi\_NCBI
- CA1D3D4H5H6Pa7pee\_Paroster\_pegelensis\_NCBI
- CA1D3D4H5H6Pa7pen\_Paroster\_pentameris\_NCBI
- CA1D3D4H5H6Pa7gibb\_Paroster\_gibbi\_NCBI
- CA1D3D4H5H6Pa7nap\_Paroster\_napperbyensis\_NCBI
- CA1D3D4H5H6Pa7mac\_Paroster\_macrocephalus\_NCBI
- CA1D3D4H5H6Pa7new\_Paroster\_newhavenensis\_NCBI
- CA1D3D4H5H6Pa7wed\_Paroster\_wedgeensis\_NCBI
- CA1D3D4H5H6Pa7meg\_Paroster\_megamacrocephalus\_NCBI
- CA1D3D4H5H6Pa7spn\_Paroster\_spmMtWedge\_NCBI
- CA1D3D4H5H6Pa7New\_Paroster\_Newhaven\_NCBI
- CA1D3D4H5H6Pa7RL2008\_2\_Paroster\_RL2008\_NCBI
- CA1D3D4H5H6Pa7ver\_Paroster\_verrucosus\_NCBI
- CA1D3D4H5H6Pa7mil\_Paroster\_milgunensis\_NCBI
- CA1D3D4H5H6Pa7ham\_Paroster\_hamoni\_NCBI
- CA1D3D4H5H6Pa7ext\_Paroster\_extraordinarius\_NCBI
- CA1D3D4H5H6Pa7byr\_Paroster\_byroensis\_NCBI

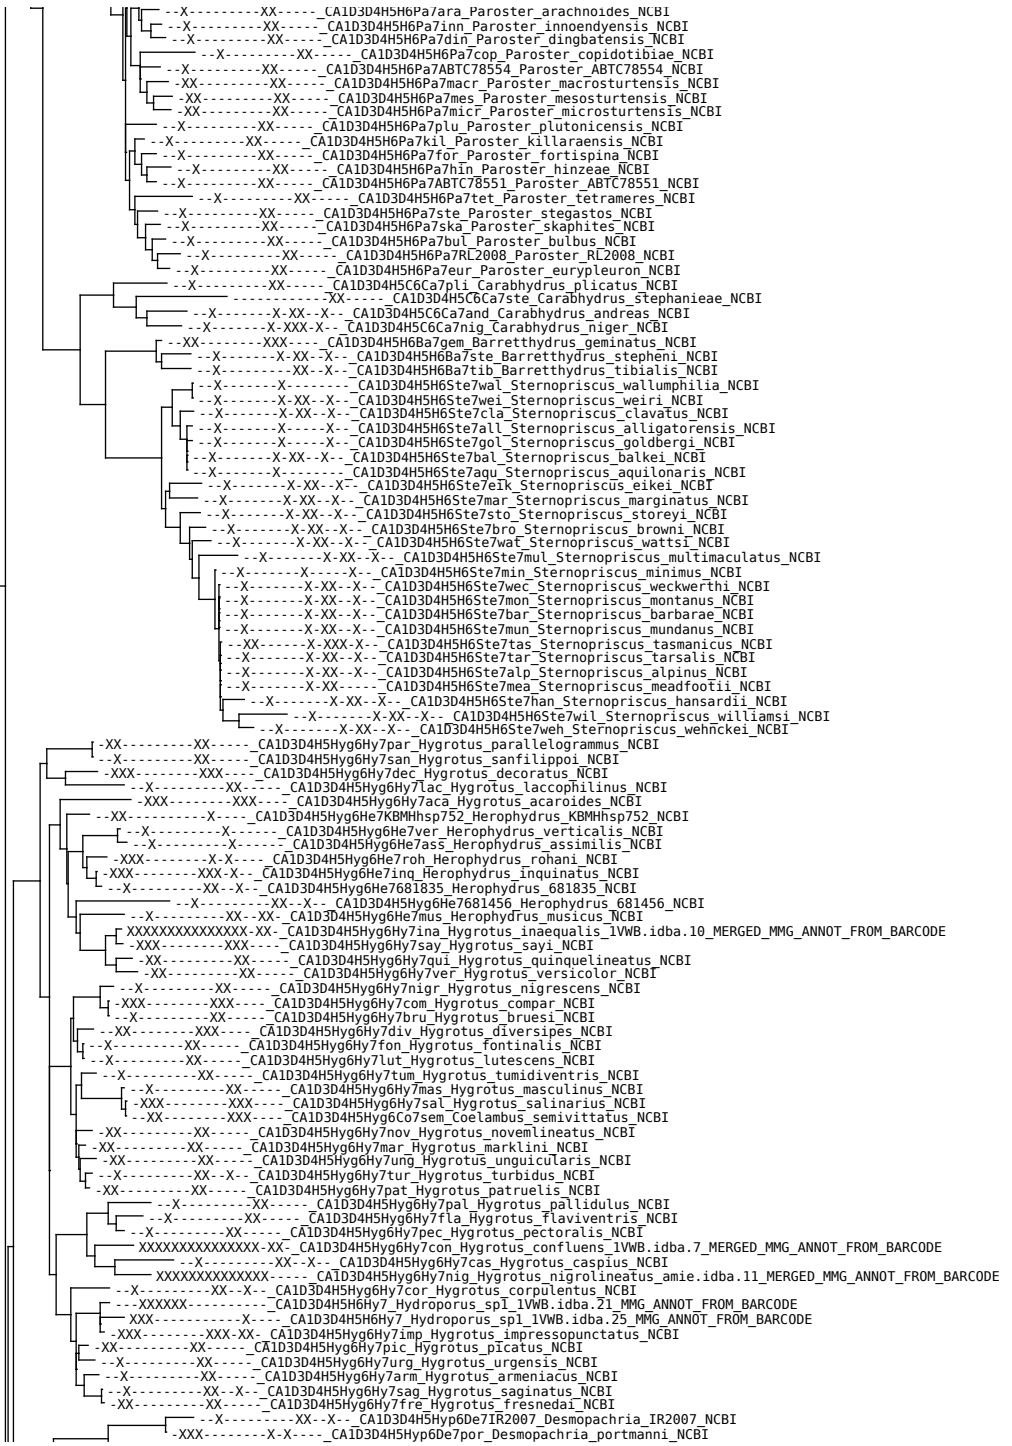

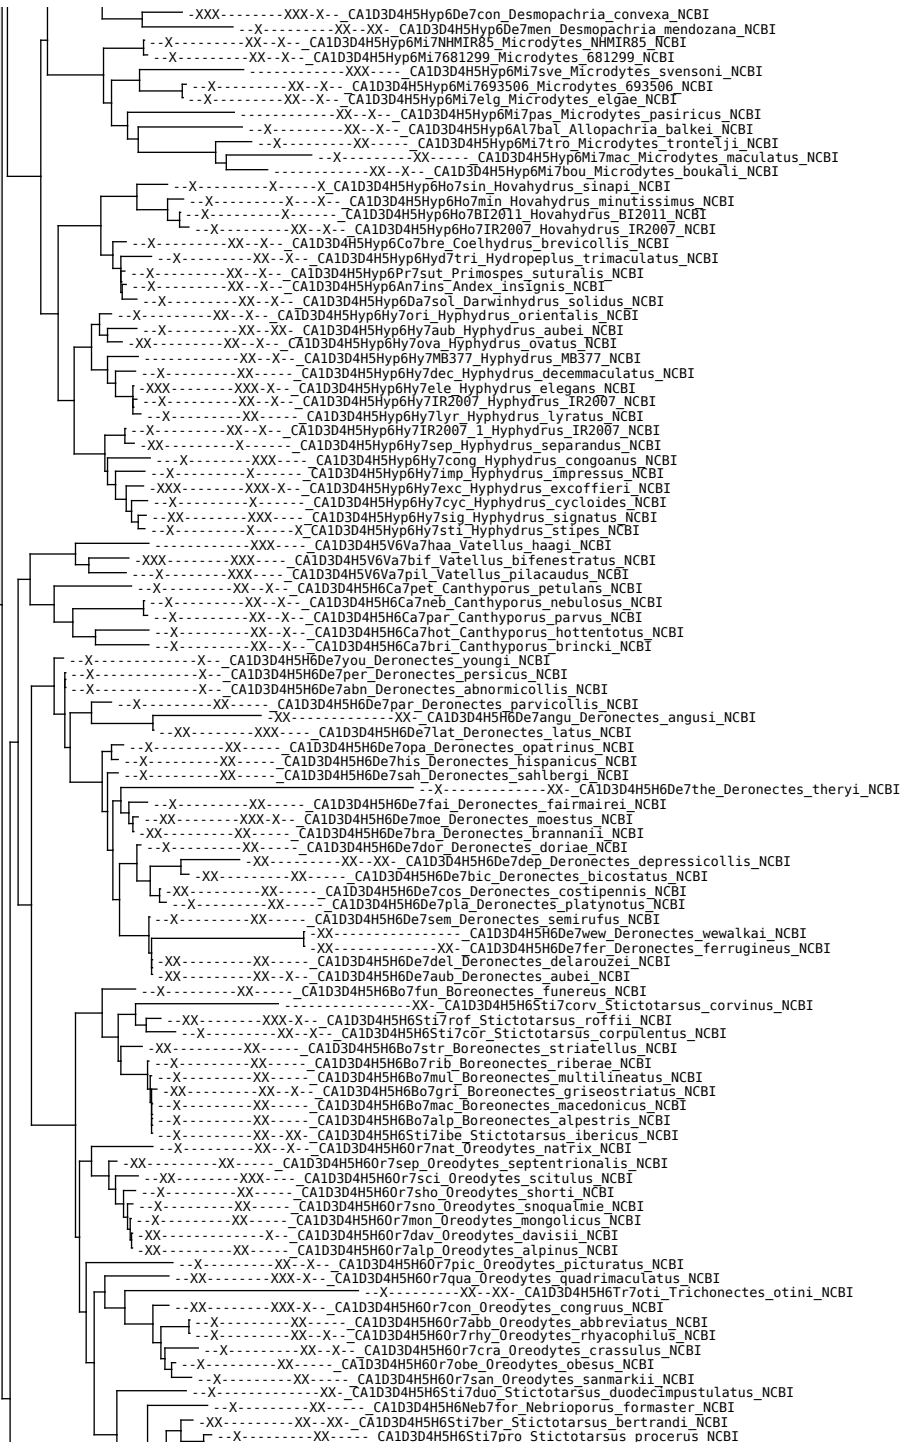

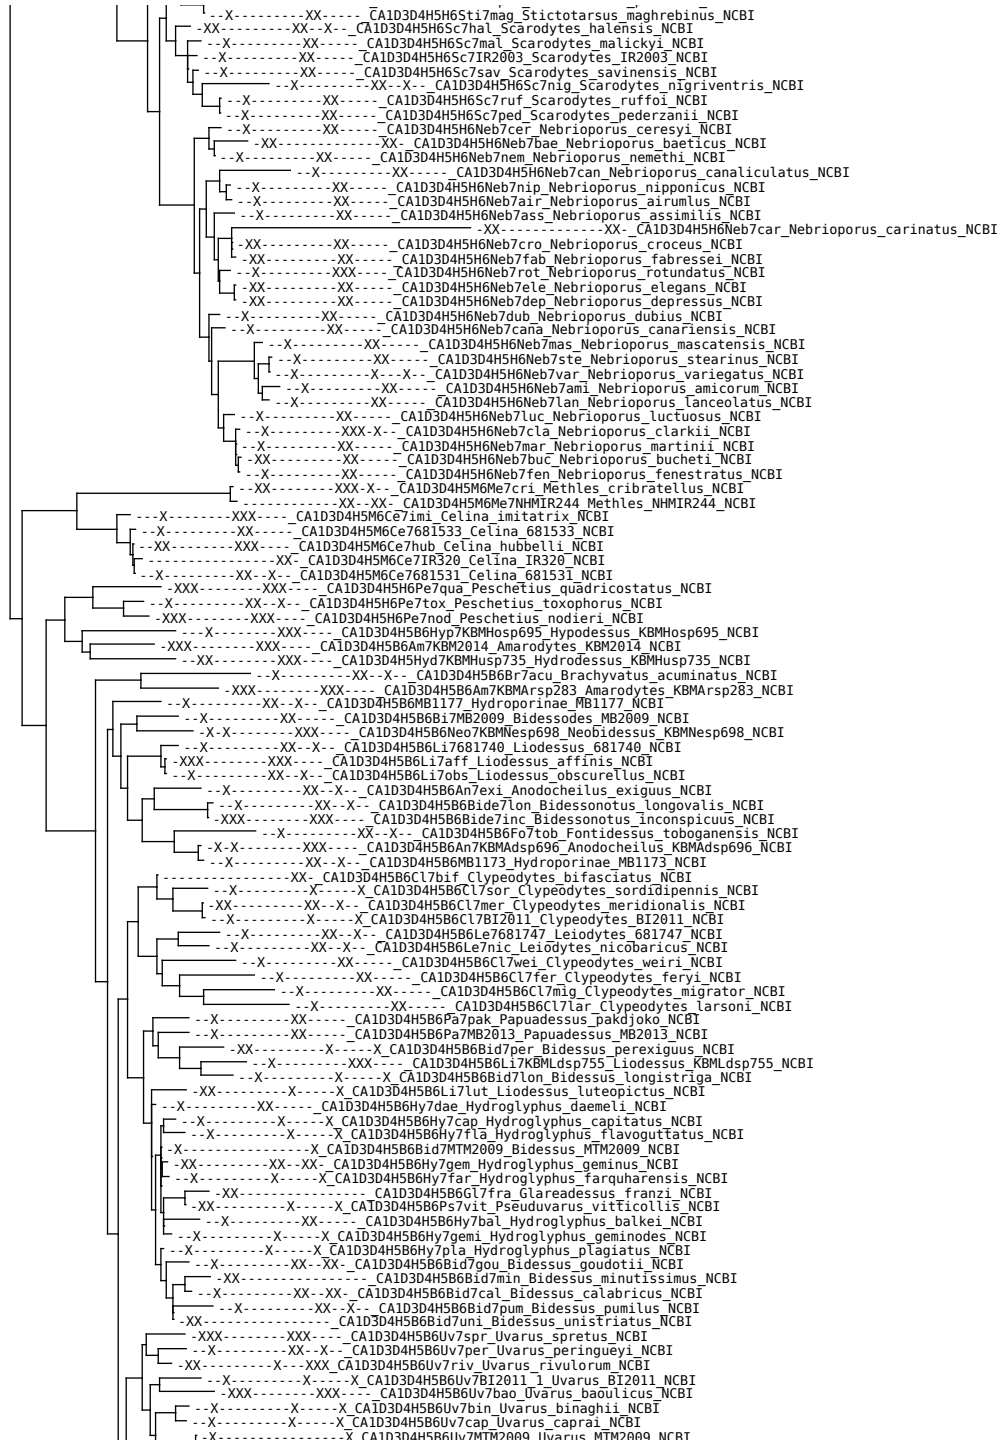

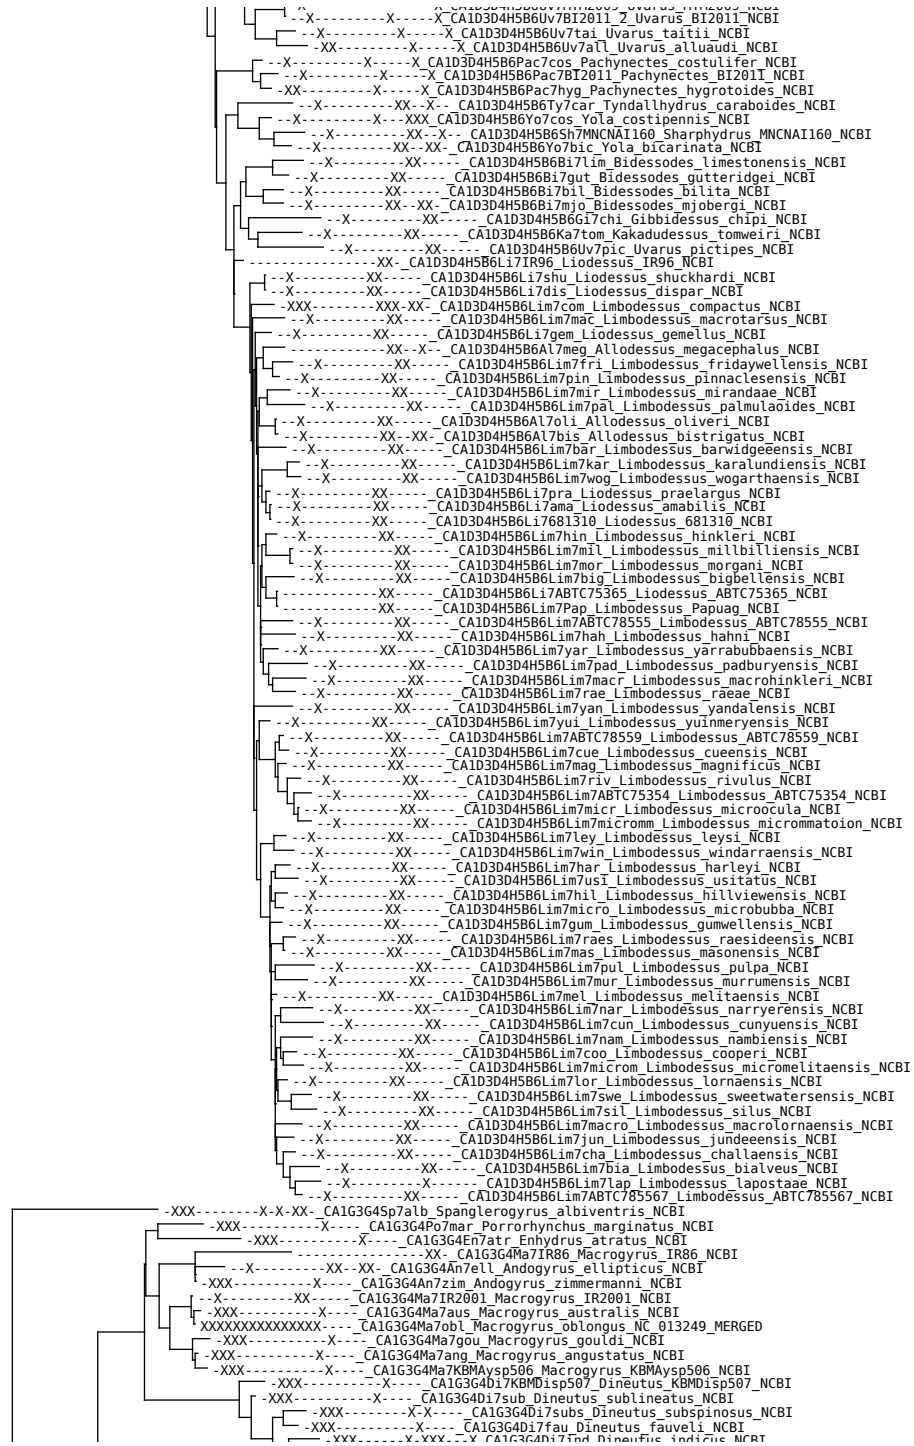



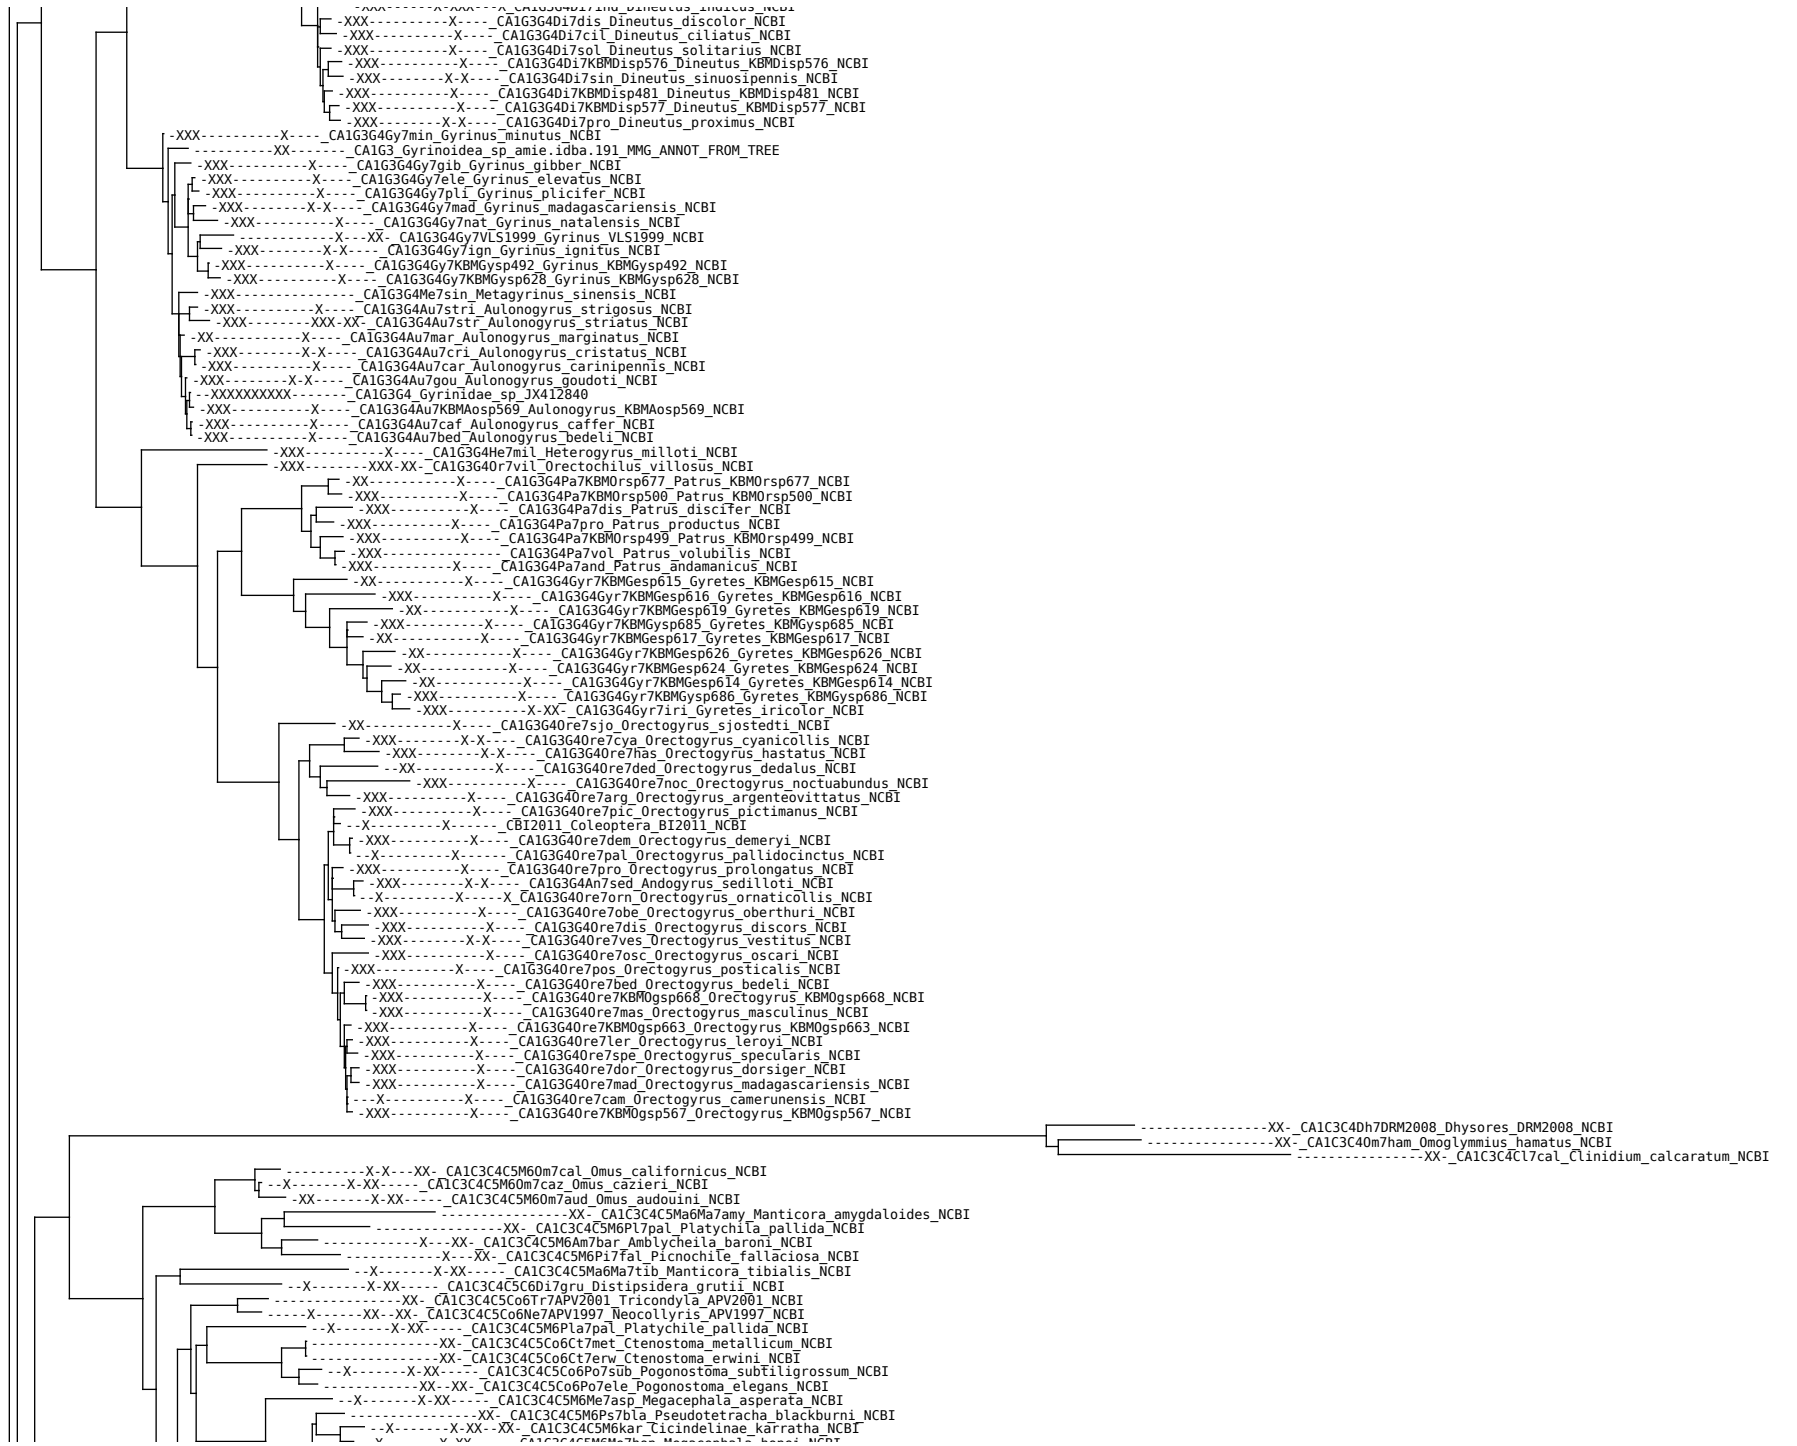

Phylogenetic tree showing relationships among various species, primarily from the genus *Cicindela* and related genera. The tree is rooted on the left and branches out to the right. Each terminal node is labeled with a taxon name and a source code (e.g., NCBI). The labels include accession numbers (e.g., CA13C4C5M6Me7bos) and species names (e.g., *Megacephala bostockii*, *Cicindela regalis*, *Zecicindela hamiltoni*). The tree shows a complex branching pattern, indicating evolutionary relationships and clades within the group.

--X-----X-XX-----CA1C3C4C5C6C17JP37\_Cicindela\_JP37\_NCBI  
--X-----X-XX-----CA1C3C4C5C6C17JP51\_Cicindela\_JP51\_NCBI  
--X-----X-XX-----CA1C3C4C5C6C17JP25a\_Cicindela\_JP25a\_NCBI  
--X-----X-XX-----CA1C3C4C5C6C17JP23\_Cicindela\_JP23\_NCBI  
--X-----X-XX-----CA1C3C4C5C6C17JP22\_Cicindela\_JP22\_NCBI  
--X-----X-XX-----CA1C3C4C5C6C17JP16a\_Cicindela\_JP16a\_NCBI  
--X-----X-XX-----CA1C3C4C5C6C17JP25b\_Cicindela\_JP25b\_NCBI  
--X-----X-XX-----CA1C3C4C5C6C17JP102\_Cicindela\_JP102\_NCBI  
--X-----X-XX-----CA1C3C4C5C6C17JP34\_Cicindela\_JP34\_NCBI  
--X-----X-XX-----CA1C3C4C5C6C17JP27\_Cicindela\_JP27\_NCBI  
--X-----X-XX-----CA1C3C4C5C6C17JP31\_Cicindela\_JP31\_NCBI  
--X-----X-XX-----CA1C3C4C5C6C17JP288\_Cicindela\_JP288\_NCBI  
--X-----X-XX-----CA1C3C4C5C6C17JP14a\_Cicindela\_JP14a\_NCBI  
--X-----X-XX-----CA1C3C4C5C6C17JP289\_Cicindela\_JP289\_NCBI  
--X-----X-XX-----CA1C3C4C5C6C17JP36\_Cicindela\_JP36\_NCBI  
--X-----X-XX-----CA1C3C4C5C6C17JP112\_Cicindela\_JP112\_NCBI  
--X-----X-XX-----CA1C3C4C5C6C17JP291\_Cicindela\_JP291\_NCBI  
--X-----X-XX-----CA1C3C4C5C6C17JP293\_Cicindela\_JP293\_NCBI  
--X-----X-XX-----CA1C3C4C5C6C17JP292\_Cicindela\_JP292\_NCBI  
--X-----X-XX-----CA1C3C4C5C6C17JP32b\_Cicindela\_JP32b\_NCBI  
--X-----X-XX-----CA1C3C4C5C6C17JP1a\_Cicindela\_JP1a\_NCBI  
--X-----X-XX-----CA1C3C4C5C6C17JP209\_Cicindela\_JP209\_NCBI  
--X-----X-XX-----CA1C3C4C5C6C17JP121b\_Cicindela\_JP121b\_NCBI  
--X-----X-XX-----CA1C3C4C5C6C17JP41\_Cicindela\_JP41\_NCBI  
--X-----X-XX-----CA1C3C4C5C6C17JP3b\_Cicindela\_JP3b\_NCBI  
--X-----X-XX-----CA1C3C4C5C6C17JP18\_Cicindela\_JP18\_NCBI  
--X-----X-XX-----CA1C3C4C5C6C17JP20\_Cicindela\_JP20\_NCBI  
--X-----X-XX-----CA1C3C4C5C6C17JP47\_Cicindela\_JP47\_NCBI  
--X-----X-XX-----CA1C3C4C5C6C17JP13\_Cicindela\_JP13\_NCBI  
--X-----X-XX-----CA1C3C4C5C6C17JP106\_Cicindela\_JP106\_NCBI  
--X-----X-XX-----CA1C3C4C5C6C17JP12c\_Cicindela\_JP12c\_NCBI  
--X-----X-XX-----CA1C3C4C5C6C17JP49\_Cicindela\_JP49\_NCBI  
--X-----X-XX-----CA1C3C4C5C6C17JP104\_Cicindela\_JP104\_NCBI  
--X-----X-XX-----CA1C3C4C5C6C17JP15b\_Cicindela\_JP15b\_NCBI  
--X-----X-XX-----CA1C3C4C5C6C17JP3a\_Cicindela\_JP3a\_NCBI  
--X-----X-XX-----CA1C3C4C5C6C17JP74\_Cicindela\_JP74\_NCBI  
--X-----X-XX-----CA1C3C4C5C6C17JP210\_Cicindela\_JP210\_NCBI  
--X-----X-XX-----CA1C3C4C5C6C17JP85\_Cicindela\_JP85\_NCBI  
--X-----X-XX-----CA1C3C4C5C6C17JP88\_Cicindela\_JP88\_NCBI  
--X-----X-XX-----CA1C3C4C5C6C17JP92\_Cicindela\_JP92\_NCBI  
--X-----X-XX-----CA1C3C4C5C6C17JP91\_Cicindela\_JP91\_NCBI  
--X-----X-XX-----CA1C3C4C5C6C17JP97\_Cicindela\_JP97\_NCBI  
--X-----X-XX-----CA1C3C4C5C6C17JP94a\_Cicindela\_JP94a\_NCBI  
--X-----X-XX-----CA1C3C4C5C6C17JP146\_Cicindela\_JP146\_NCBI  
--X-----X-XX-----lefev\_Cicindela\_lefev\_NCBI  
--X-----X-XX-----CA1C3C4C5C6C17JP208\_Cicindela\_JP208\_NCBI  
--X-----X-XX-----CA1C3C4C5C6C17JP206\_Cicindela\_JP206\_NCBI  
--X-----X-XX-----CA1C3C4C5C6C17JP55\_Cicindela\_JP55\_NCBI  
--X-----X-XX-----CA1C3C4C5C6C17JP54a\_Cicindela\_JP54a\_NCBI  
--X-----X-XX-----CA1C3C4C5C6C17JP80\_Cicindela\_JP80\_NCBI  
--X-----X-XX-----CA1C3C4C5C6C17JP211\_Cicindela\_JP211\_NCBI  
--X-----X-XX-----CA1C3C4C5C6C17JP59b\_Cicindela\_JP59b\_NCBI  
--X-----X-XX-----CA1C3C4C5C6C17JP212\_Cicindela\_JP212\_NCBI  
--X-----X-XX-----CA1C3C4C5C6C17JP70\_Cicindela\_JP70\_NCBI  
--X-----X-XX-----CA1C3C4C5C6C17JP203\_Cicindela\_JP203\_NCBI  
--X-----X-XX-----CA1C3C4C5C6C17JP63b\_Cicindela\_JP63b\_NCBI  
--X-----X-XX-----CA1C3C4C5C6C17JP133\_Cicindela\_JP133\_NCBI  
--X-----X-XX-----CA1C3C4C5C6C17JP71\_Cicindela\_JP71\_NCBI  
--X-----X-XX-----CA1C3C4C5C6C17JP62\_Cicindela\_JP62\_NCBI  
--X-----X-XX-----CA1C3C4C5C6C17JP63a\_Cicindela\_JP63a\_NCBI  
--X-----X-XX-----CA1C3C4C5C6C17JP57\_Cicindela\_JP57\_NCBI  
--X-----X-XX-----CA1C3C4C5C6C17JP65\_Cicindela\_JP65\_NCBI  
--X-----X-XX-----CA1C3C4C5C6C17JP68b\_Cicindela\_JP68b\_NCBI  
--X-----X-XX-----CA1C3C4C5C6C17JP54b\_Cicindela\_JP54b\_NCBI  
--X-----X-XX-----CA1C3C4C5C6C17JP207\_Cicindela\_JP207\_NCBI  
--X-----X-XX-----CA1C3C4C5C6C17JP137\_Cicindela\_JP137\_NCBI  
--X-----X-XX-----CA1C3C4C5C6C17JP205\_Cicindela\_JP205\_NCBI  
--X-----X-XX-----CA1C3C4C5C6C17JP200\_Cicindela\_JP200\_NCBI  
--X-----X-XX-----CA1C3C4C5C6C17JP52\_Cicindela\_JP52\_NCBI  
--X-----X-XX-----CA1C3C4C5C6C17JP53a\_Cicindela\_JP53a\_NCBI  
--X-----X-XX-----CA1C3C4C5C6C17JP53b\_Cicindela\_JP53b\_NCBI  
--X-----X-XX-----CA1C3C4C5C6C17goo\_Cicindela\_goon\_NCBI  
--X-----X-XX-----CA1C3C4C5C6C17JP67a\_Cicindela\_JP67a\_NCBI  
--X-----X-XX-----CA1C3C4C5C6C17JP75\_Cicindela\_JP75\_NCBI  
--X-----X-XX-----CA1C3C4C5C6C17JP69b\_Cicindela\_JP69b\_NCBI  
--X-----X-XX-----CA1C3C4C5C6C17JP90\_Cicindela\_JP90\_NCBI  
--X-----X-XX-----CA1C3C4C5C6C17JP201\_Cicindela\_JP201\_NCBI  
--X-----X-XX-----CA1C3C4C5C6C17JP140\_Cicindela\_JP140\_NCBI  
--X-----X-XX-----CA1C3C4C5C6C17JP59a\_Cicindela\_JP59a\_NCBI  
--X-----X-XX-----CA1C3C4C5C6C17JP67b\_Cicindela\_JP67b\_NCBI  
--X-----X-XX-----CA1C3C4C5C6C17JP204\_Cicindela\_JP204\_NCBI  
--X-----X-XX-----CA1C3C4C5C6C17JP142\_Cicindela\_JP142\_NCBI  
--X-----X-XX-----CA1C3C4C5C6C17JP68a\_Cicindela\_JP68a\_NCBI  
--X-----X-XX-----CA1C3C4C5C6C17JP202\_Cicindela\_JP202\_NCBI  
--X-----X-XX-----CA1C3C4C5C6C17JP58\_Cicindela\_JP58\_NCBI  
--X-----X-XX-----CA1C3C4C5C6C17JP56\_Cicindela\_JP56\_NCBI  
--X-----X-XX-----CA1C3C4C5C6C17JP60\_Cicindela\_JP60\_NCBI  
--X-----X-XX-----CA1C3C4C5C6C17JP69a\_Cicindela\_JP69a\_NCBI  
--X-----X-XX-----CA1C3C4C5C6C17JP68c\_Cicindela\_JP68c\_NCBI  
--X-----X-XX-----CA1C3C4C5C6C17chr\_Cicindela\_chryssippe\_NCBI  
--X-----X-XX-----CA1C3C4C5C6C17gue\_Cicindela\_guerrerenensis\_NCBI  
XXXXXXXXXXXXXXXXXX-CA1C3C4C5C6Hab7cap\_Habrodera\_capensis\_JX412824\_MERGED  
--X-----X-XX-----CA1C3C4C5C6Pe7dis\_Pentacomia\_discrepans\_NCBI  
--X-----X-XX-----CA1C3C4C5C6Cep7his\_Cephalota\_hispanica\_NCBI  
--X-----X-XX-----CA1C3C4C5C6Euz7tet\_Euzona\_tetragramma\_NCBI  
--X-----X-XX-----CA1C3C4C5C6Ca7fro\_Calypptoglossa\_frontalis\_NCBI  
--X-----X-XX-----CA1C3C4C5C6Hab7ml\_Habrodera\_nilotica\_NCBI  
--X-----X-XX-----CA1C3C4C5C6Hab7ru\_Habrodera\_truncatilibris\_NCBI  
--X-----X-XX-----CA1C3C4C5C6C17egu\_Cicindela\_equestris\_NCBI  
--X-----X-XX-----CA1C3C4C5C6C17bic\_Cicindela\_bicolor\_NCBI

..X-X-X-X-XX- CA1C3C4C5C6C17fab\_Cicindela\_fabriciana NCBI  
-X-XX-XX- CA1C3C4C5C6C17whi\_Cicindela\_whithillii NCBI  
-X-XX-XX- CA1C3C4C5C6C17sexp\_Cicindela\_sexpunctata NCBI  
-X-XX-XX- CA1C3C4C5C6C17fla\_Cicindela\_flavomaculata NCBI  
-X-X-XX-XX- CA1C3C4C5C6C17tenu\_Cicindela\_tenuisignata NCBI  
-X-XX-XX- CA1C3C4C5C6C17ioe\_Cicindela\_ioessa NCBI  
-X-XX-XX- CA1C3C4C5C6C17nigr1\_Cicindela\_nigrifilabris NCBI  
-X-XX-XX- CA1C3C4C5C6C17aur\_Cicindela\_aurora NCBI  
-X-X-XX-XX- CA1C3C4C5C6C17ate\_Cicindela\_aterrima NCBI  
-X-X-XX-XX- CA1C3C4C5C6C17nigr\_Cicindela\_nigrocoerulea NCBI  
-X-X-XX-XX- CA1C3C4C5C6Cep7cir\_Cephalota\_circumdata NCBI  
-X-XX-XX- CA1C3C4C5C6Cep7lit\_Cephalota\_litorea NCBI  
-X-XX-XX- CA1C3C4C5C6C17hor\_Cicindela\_hornii NCBI  
-X-XX-XX- CA1C3C4C5C6C17pse\_Cicindela\_pseudothalestris NCBI  
-X-XX-XX- CA1C3C4C5C6C17cra\_Cicindela\_craveri NCBI  
-XX-X-XX-XX- CA1C3C4C5C6C17obs\_Cicindela\_obsoleta NCBI  
-XX-X-XX-XX- CA1C3C4C5C6C17pun\_Cicindela\_punctulata NCBI  
-X-XX-XX- CA1C3C4C5C6C17rug\_Cicindela\_rugatilis NCBI  
-X-XX-XX- CA1C3C4C5C6Cy7sak\_Cylindera\_sakalava NCBI  
-X-XX-XX- CA1C3C4C5C6C17pie\_Cicindela\_pierroni NCBI  
-X-X-XX-XX- CA1C3C4C5C6Ja7chl\_Jansenia\_chloropleura NCBI  
-X-XX-XX- CA1C3C4C5C6C17ong\_Cicindela\_ongosiceps NCBI  
-X-XX-XX- CA1C3C4C5C6Ja7azu\_Jansenia\_azureocincta NCBI  
-X-XX-XX- CA1C3C4C5C6Ja7mot\_Jansenia\_motschulskyana NCBI  
-X-XX-XX- CA1C3C4C5C6Ja7vir\_Jansenia\_viridicincta NCBI  
-X-XX-XX- CA1C3C4C5C6C17ara\_Cicindela\_arachnoides NCBI  
-X-XX-XX- CA1C3C4C5C6Ja7psa\_Jansenia\_psarodea NCBI  
-X-XX-XX- CA1C3C4C5C6Ja7app\_Jansenia\_applanata NCBI  
-X-X-XX-XX- CA1C3C4C5C6Ja7ros\_Jansenia\_rostrulla NCBI  
-X-XX-XX- CA1C3C4C5C6Ja7pla\_Jansenia\_plagatima NCBI  
-X-XX-XX- CA1C3C4C5C6Ja7das\_Jansenia\_dasiodes NCBI  
-X-X-XX-XX- CA1C3C4C5C6Cy7lem\_Cylindera\_lemniscata NCBI  
-X-X-XX-XX- CA1C3C4C5C6Cy7cel\_Cylindera\_celeripes NCBI  
-X-X-XX-XX- CA1C3C4C5C6Cy7ter\_Cylindera\_terricola NCBI  
-X-X-XX-XX- CA1C3C4C5C6Cy7nep\_Cylindera\_nepheola NCBI  
-X-X-XX-XX- CA1C3C4C5C6Cy7lun\_Cylindera\_lunilonga NCBI  
-X-X-XX-XX- CA1C3C4C5C6Cy7cin\_Cylindera\_cinctipennis NCBI  
-X-X-XX-XX- CA1C3C4C5C6Cy7zaz\_Cylindera\_zaza NCBI  
-X-XX-XX- CA1C3C4C5C6Cy7ovi\_Cylindera\_ovipennis NCBI  
-X-XX-XX- CA1C3C4C5C6Cy7ger\_Cylindera\_germanica NCBI  
-X-XX-XX- CA1C3C4C5C6Cy7kal\_Cylindera\_kaleea NCBI  
-X-X-XX-XX- CA1C3C4C5C6Cy7bel\_Cylindera\_belli NCBI  
-X-XX-XX- CA1C3C4C5C6Cy7fov\_Cylindera\_foveolata NCBI  
-X-XX-XX- CA1C3C4C5C6Cy7bell\_Cylindera\_belloides NCBI  
-X-X-XX-XX- CA1C3C4C5C6Cy7bip\_Cylindera\_biprolongata NCBI  
-X-X-XX-XX- CA1C3C4C5C6Cy7lab\_Cylindera\_labioenea NCBI  
-X-XX-XX- CA1C3C4C5C6C17sah\_Cicindela\_sahlbergi NCBI  
-X-XX-XX- CA1C3C4C5C6Cy7agn\_Cylindera\_agnata NCBI  
-X-XX-XX- CA1C3C4C5C6Cy7ven\_Cylindera\_venosa NCBI  
-X-XX-XX- CA1C3C4C5C6S7ang\_Stenocosmia\_angusta NCBI  
-X-X-XX-XX- CA1C3C4C5C6Cal7mal\_Callytron\_malabaricum NCBI  
-X-XX-XX- CA1C3C4C5C6Cal7ins\_Callytron\_inspeculare NCBI  
-X-XX-XX- CA1C3C4C5C6Cal7yua\_Callytron\_yuasai NCBI  
-X-XX-XX- CA1C3C4C5C6Dr7mau\_Dromica\_mauchii NCBI  
-X-XX-XX- CA1C3C4C5C6P7ass\_Prothyma\_assamensis NCBI  
-X-XX-XX- CA1C3C4C5C6Dr7APV2001\_Dromica\_APV2001 NCBI  
-X-XX-XX- CA1C3C4C5C6Pr7rad\_Prothyma\_radama NCBI  
-X-XX-XX- CA1C3C4C5C6Cy7eru\_Cylindera\_eruda NCBI  
-X-XX-XX- CA1C3C4C5C6Cy7cog\_Cylindera\_cognata NCBI  
-X-XX-XX- CA1C3C4C5C6Cy7mut\_Cylindera\_mutata NCBI  
-X-XX-XX- CA1C3C4C5C6Cy7gra\_Cylindera\_grammophora NCBI  
-X-X-XX-XX- CA1C3C4C5C6Cy7min\_Cylindera\_minuta NCBI  
-X-XX-XX- CA1C3C4C5C6Cy7big\_Cylindera\_bigemina NCBI  
-X-XX-XX- CA1C3C4C5C6Cy7bon\_Cylindera\_bonina NCBI  
-X-XX-XX- CA1C3C4C5C6Cy7tri\_Cylindera\_trisignata NCBI  
-X-XX-XX- CA1C3C4C5C6Cy7eti\_Cylindera\_elisae NCBI  
-X-XX-XX- CA1C3C4C5C6Cy7dis\_Cylindera\_disjuncta NCBI  
-X-XX-XX- CA1C3C4C5C6Cy7fal\_Cylindera\_fallax NCBI  
-X-XX-XX- CA1C3C4C5C6Cy7vid\_Cylindera\_viduata NCBI  
-X-XX-XX- CA1C3C4C5C6Cy7rec\_Cylindera\_rectangularis NCBI  
-X-XX-XX- CA1C3C4C5C6Cy7ane\_Cylindera\_anelia NCBI  
-X-XX-XX- CA1C3C4C5C6Cy7sub\_Cylindera\_subtilesignata NCBI  
-X-XX-XX- CA1C3C4C5C6Cy7och\_Cylindera\_ochromemis NCBI  
-X-XX-XX- CA1C3C4C5C6Cy7del\_Cylindera\_delavayi NCBI  
-X-XX-XX- CA1C3C4C5C6Br7arg\_Brasielia\_argentata NCBI  
-X-XX-XX- CA1C3C4C5C6Br7bat\_Brasielia\_batzani NCBI  
-X-X-XX-XX- CA1C3C4C5C6Br7hem\_Brasielia\_hemichrysea NCBI  
-X-X-XX-XX- CA1C3C4C5C6Br7wic\_Brasielia\_wickhami NCBI  
-X-X-XX-XX- CA1C3C4C5C6Br7aur\_Brasielia\_aureola NCBI  
-X-XX-XX- CA1C3C4C5C6Cy7sut\_Cylindera\_suturalis NCBI  
-X-X-XX-XX- CA1C3C4C5C6Cy7mix\_Cylindera\_mixtula NCBI  
-X-X-XX-XX- CA1C3C4C5C6Cy7viri\_Cylindera\_viridisticta NCBI  
-X-X-XX-XX- CA1C3C4C5C6Cy7pul\_Cylindera\_pulchrapraecisa NCBI  
-X-XX-XX- CA1C3C4C5C6Cy7pra\_Cylindera\_praecisa NCBI  
-X-XX-XX- CA1C3C4C5C6C17nev\_Cicindela\_nevadica NCBI  
-X-XX-XX- CA1C3C4C5C6C17ham\_Cicindela\_hamata NCBI  
-X-XX-XX- CA1C3C4C5C6C17marg\_Cicindela\_marginata NCBI  
-X-XX-XX- CA1C3C4C5C6C17pur\_Cicindela\_puritana NCBI  
-X-X-XX-XX- CA1C3C4C5C6C17mac\_Cicindela\_macra NCBI  
-X-X-XX-XX- CA1C3C4C5C6C17wap\_Cicindela\_wapleri NCBI  
-XX-X-XX-XX- CA1C3C4C5C6C17bla\_Cicindela\_blanda NCBI  
-X-X-XX-XX- CA1C3C4C5C6C17lep\_Cicindela\_lepida NCBI  
-X-X-XX-XX- CA1C3C4C5C6C17hirt\_Cicindela\_hirtiflabilis NCBI  
-X-X-XX-XX- CA1C3C4C5C6C17spe\_Cicindela\_sperata NCBI  
-X-X-XX-XX- CA1C3C4C5C6C17gra\_Cicindela\_gratiosa NCBI  
-X-XX-XX- CA1C3C4C5C6C17maru\_Cicindela\_marutha NCBI  
-X-XX-XX- CA1C3C4C5C6C17cup\_Cicindela\_cuprascens NCBI  
-X-XX-XX- CA1C3C4C5C6C17rug1\_Cicindela\_rugicollis NCBI  
-X-X-XX-XX- CA1C3C4C5C6C17jap\_Cicindela\_japonica NCBI  
-X-XX-XX-XX- CA1C3C4C5C6C17fer\_Cicindela\_ferriei NCBI

-X-X-X-X-CA1C3C4C5C6C17chi\_Cicindela\_chinensis NCBI  
-X-X-X-X-CA1C3C4C5C6C17set\_Cicindela\_setosomalaris NCBI  
-X-X-X-X-CA1C3C4C5C6C17vir\_Cicindela\_virgula NCBI  
-X-X-X-X-CA1C3C4C5C6C17auru\_Cicindela\_aurulenta NCBI  
-X-X-X-X-CA1C3C4C5C6C17ant\_Cicindela\_intermedia NCBI  
-X-X-X-X-CA1C3C4C5C6par\_Cicindelinae\_parryi NCBI  
-X-X-X-X-CA1C3C4C5C6lat\_Cicindelinae\_latecincta NCBI  
-X-X-X-X-CA1C3C4C5C6tub\_Cicindelinae\_tuberculata NCBI  
-X-X-X-X-CA1C3C4C5C6wai\_Cicindelinae\_waiouransensis NCBI  
-X-X-X-X-CA1C3C4C5C6dun\_Cicindelinae\_dunedensis NCBI  
-X-X-X-X-CA1C3C4C5C6Lo7str\_Lophyra\_striolata NCBI  
-X-X-X-X-CA1C3C4C5C6C17BMH703842\_Cicindela\_BMH703842 NCBI  
-X-X-X-X-CA1C3C4C5C6Cy7deb\_Cylindera\_debilis NCBI  
-X-X-X-X-CA1C3C4C5C6C17lew\_Cicindela\_lewisi NCBI  
-X-X-X-X-CA1C3C4C5C6Cy7wai\_Cylindera\_wallei NCBI  
-X-X-X-X-CA1C3C4C5C6Cy7wat\_Cylindera\_waterhousei NCBI  
-X-X-X-X-CA1C3C4C5C6C17japa\_Cicindela\_japana NCBI  
-X-X-X-X-CA1C3C4C5C6C17gem\_Cicindela\_gemmata NCBI  
-X-X-X-X-CA1C3C4C5C6C17cam\_Cicindela\_campestris NCBI  
-X-X-X-X-CA1C3C4C5C6C17mar\_Cicindela\_maroccana NCBI  
-X-X-X-X-CA1C3C4C5C6C17lag\_Cicindela\_lagunensis NCBI  
-X-X-X-X-CA1C3C4C5C6C17ibe\_Cicindela\_iberica NCBI  
-X-X-X-X-CA1C3C4C5C6C17maj\_Cicindela\_majalis NCBI  
-X-X-X-X-CA1C3C4C5C6C17hyb\_Cicindela\_hybrida NCBI  
-X-X-X-X-CA1C3C4C5C6C17lus\_Cicindela\_lusitanica NCBI  
-X-X-X-X-CA1C3C4C5C6C17tran\_Cicindela\_transversalis NCBI  
-X-X-X-X-CA1C3C4C5C6Cy7sev\_Cylindera\_severini NCBI  
-X-X-X-X-CA1C3C4C5C6C17rep\_Cicindela\_repanda NCBI  
-X-X-X-X-CA1C3C4C5C6C17mari\_Cicindela\_maritima NCBI  
-X-X-X-X-CA1C3C4C5C6C17hir\_Cicindela\_hirticollis NCBI  
-X-X-X-X-CA1C3C4C5C6C17cya\_Cicindela\_cyaniventris NCBI  
-X-X-X-X-CA1C3C4C5C6C17aen\_Cicindela\_aeneicollis NCBI  
-X-X-X-X-CA1C3C4C5C6C17duo\_Cicindela\_duodecimguttata NCBI  
-X-X-X-X-CA1C3C4C5C6C17dep\_Cicindela\_depressula NCBI  
-X-X-X-X-CA1C3C4C5C6C17are\_Cicindela\_arenicola NCBI  
-X-X-X-X-CA1C3C4C5C6C17way\_Cicindela\_waynei NCBI  
-X-X-X-X-CA1C3C4C5C6C17colu\_Cicindela\_columbica NCBI  
-X-X-X-X-CA1C3C4C5C6C17the\_Cicindela\_theatina NCBI  
-X-X-X-X-CA1C3C4C5C6C17bel\_Cicindela\_bellissima NCBI  
-X-X-X-X-CA1C3C4C5C6C17lim\_Cicindela\_limbata NCBI  
-X-X-X-X-CA1C3C4C5C6C17ore\_Cicindela\_oregona NCBI  
-X-X-X-X-CA1C3C4C5C6Ha7cur\_Habroscelimorpha\_curvata NCBI  
-X-X-X-X-CA1C3C4C5C6Ha7dor\_Habroscelimorpha\_dorsalis NCBI  
-X-X-X-X-CA1C3C4C5C6Ha7pam\_Habroscelimorpha\_pamphila NCBI  
-X-X-X-X-CA1C3C4C5C6Ha7gab\_Habroscelimorpha\_gabbi NCBI  
-X-X-X-X-CA1C3C4C5C6C17tog\_Cicindela\_togata NCBI  
-X-X-X-X-CA1C3C4C5C6Ha7ca\_Habroscelimorpha\_californica NCBI  
-X-X-X-X-CA1C3C4C5C6Ha7sev\_Habroscelimorpha\_severa NCBI  
-X-X-X-X-CA1C3C4C5C6Ha7boo\_Habroscelimorpha\_boops NCBI  
-X-X-X-X-CA1C3C4C5C6Ha7str\_Habroscelimorpha\_striga NCBI  
-X-X-X-X-CA1C3C4C5C6Ha7cir\_Habroscelimorpha\_circumpicta NCBI  
-X-X-X-X-CA1C3C4C5C6Ha7pra\_Habroscelimorpha\_praetextata NCBI  
-X-X-X-X-CA1C3C4C5C6Ha7ful\_Habroscelimorpha\_fulgoris NCBI  
-X-X-X-X-CA1C3C4C5C6C17ken\_Cicindela\_kenyana NCBI  
-X-X-X-X-CA1C3C4C5C6C17abe\_Cicindela\_aberrans NCBI  
-X-X-X-X-CA1C3C4C5C6Op7gra\_Opilidia\_graphiptera NCBI  
-X-X-X-X-CA1C3C4C5C6Op7chl\_Opilidia\_chlorocephala NCBI  
-X-X-X-X-CA1C3C4C5C6My7fas\_Myriochila\_festidiosa NCBI  
-X-X-X-X-CA1C3C4C5C6My7spe\_Myriochila\_speculifera NCBI  
-X-X-X-X-CA1C3C4C5C6My7mas\_Myriochila\_mastersi NCBI  
-X-X-X-X-CA1C3C4C5C6My7par\_Myriochila\_parasemlincincta NCBI  
-X-X-X-X-CA1C3C4C5C6My7hau\_Myriochila\_hauseri NCBI  
-X-X-X-X-CA1C3C4C5C6My7und\_Myriochila\_undulata NCBI  
-X-X-X-X-CA1C3C4C5C6My7mel\_Myriochila\_melancholica NCBI  
-X-X-X-X-CA1C3C4C5C6Ha7eur\_Habroscelimorpha\_euryscopa NCBI  
-X-X-X-X-CA1C3C4C5C6C17tra\_Cicindela\_transbaicalica NCBI  
-X-X-X-X-CA1C3C4C5C6C17anch\_Cicindela\_anchoralis NCBI  
-X-X-X-X-CA1C3C4C5C6C17som\_Cicindela\_sommeri NCBI  
-X-X-X-X-CA1C3C4C5C6C17ros\_Cicindela\_roseiventris NCBI  
-X-X-X-X-CA1C3C4C5C6C17rufo\_Cicindela\_rufoaeana NCBI  
-X-X-X-X-CA1C3C4C5C6C17mat\_Cicindela\_mathani NCBI  
-X-X-X-X-CA1C3C4C5C6C17oce\_Cicindela\_ocellata NCBI  
-X-X-X-X-CA1C3C4C5C6C17hig\_Cicindela\_highlandensis NCBI  
-X-X-X-X-CA1C3C4C5C6C17abd\_Cicindela\_abdominalis NCBI  
-X-X-X-X-CA1C3C4C5C6C17sed\_Cicindela\_sedecimpunctata NCBI  
-X-X-X-X-CA1C3C4C5C6C17ruf\_Cicindela\_rufiventris NCBI  
-X-X-X-X-CA1C3C4C5C6C17pol\_Cicindela\_politula NCBI  
-X-X-X-X-CA1C3C4C5C6C17caz\_Cicindela\_cazieri NCBI  
-X-X-X-X-CA1C3C4C5C6C17sch\_Cicindela\_schauppii NCBI  
-X-X-X-X-CA1C3C4C5C6C17nebu\_Cicindela\_nebuligera NCBI  
-X-X-X-X-CA1C3C4C5C6C17oax\_Cicindela\_oaxensis NCBI  
-X-X-X-X-CA1C3C4C5C6C17flo\_Cicindela\_flohri NCBI  
-X-X-X-X-CA1C3C4C5C6C17clar\_Cicindela\_clarina NCBI  
-X-X-X-X-CA1C3C4C5C6C17hyd\_Cicindela\_hydrophoba NCBI  
-X-X-X-X-CA1C3C4C5C6C17rufi\_Cicindela\_ruficaputi NCBI  
-X-X-X-X-CA1C3C4C5C6C17dys\_Cicindela\_dysenterica NCBI  
-X-X-X-X-CA1C3C4C5C6C17ben\_Cicindela\_beneshi NCBI  
-X-X-X-X-CA1C3C4C5C6C17hae\_Cicindela\_haemorrhagica NCBI  
-X-X-X-X-CA1C3C4C5C6C17car\_Cicindela\_carthagena NCBI  
-X-X-X-X-CA1C3C4C5C6Calo7lun\_Calomera\_lunulata NCBI  
-X-X-X-X-CA1C3C4C5C6Calo7lug\_Calomera\_lugens NCBI  
-X-X-X-X-CA1C3C4C5C6Calo7car\_Calomera\_cardoni NCBI  
-X-X-X-X-CA1C3C4C5C6Calo7chl\_Calomera\_chloris NCBI  
-X-X-X-X-CA1C3C4C5C6Calo7ang\_Calomera\_angulata NCBI  
-X-X-X-X-CA1C3C4C5C6C17sple\_Cicindela\_splendida NCBI  
-X-X-X-X-CA1C3C4C5C6C17lat\_Cicindela\_latesignata NCBI  
-X-X-X-X-CA1C3C4C5C6C17tranq\_Cicindela\_tranquebarica NCBI  
-X-X-X-X-CA1C3C4C5C6Pro7ang\_Prothymidia\_angusticollis NCBI  
-X-X-X-X-CA1C3C4C5C6C17zur\_Cicindela\_zurrupea NCBI

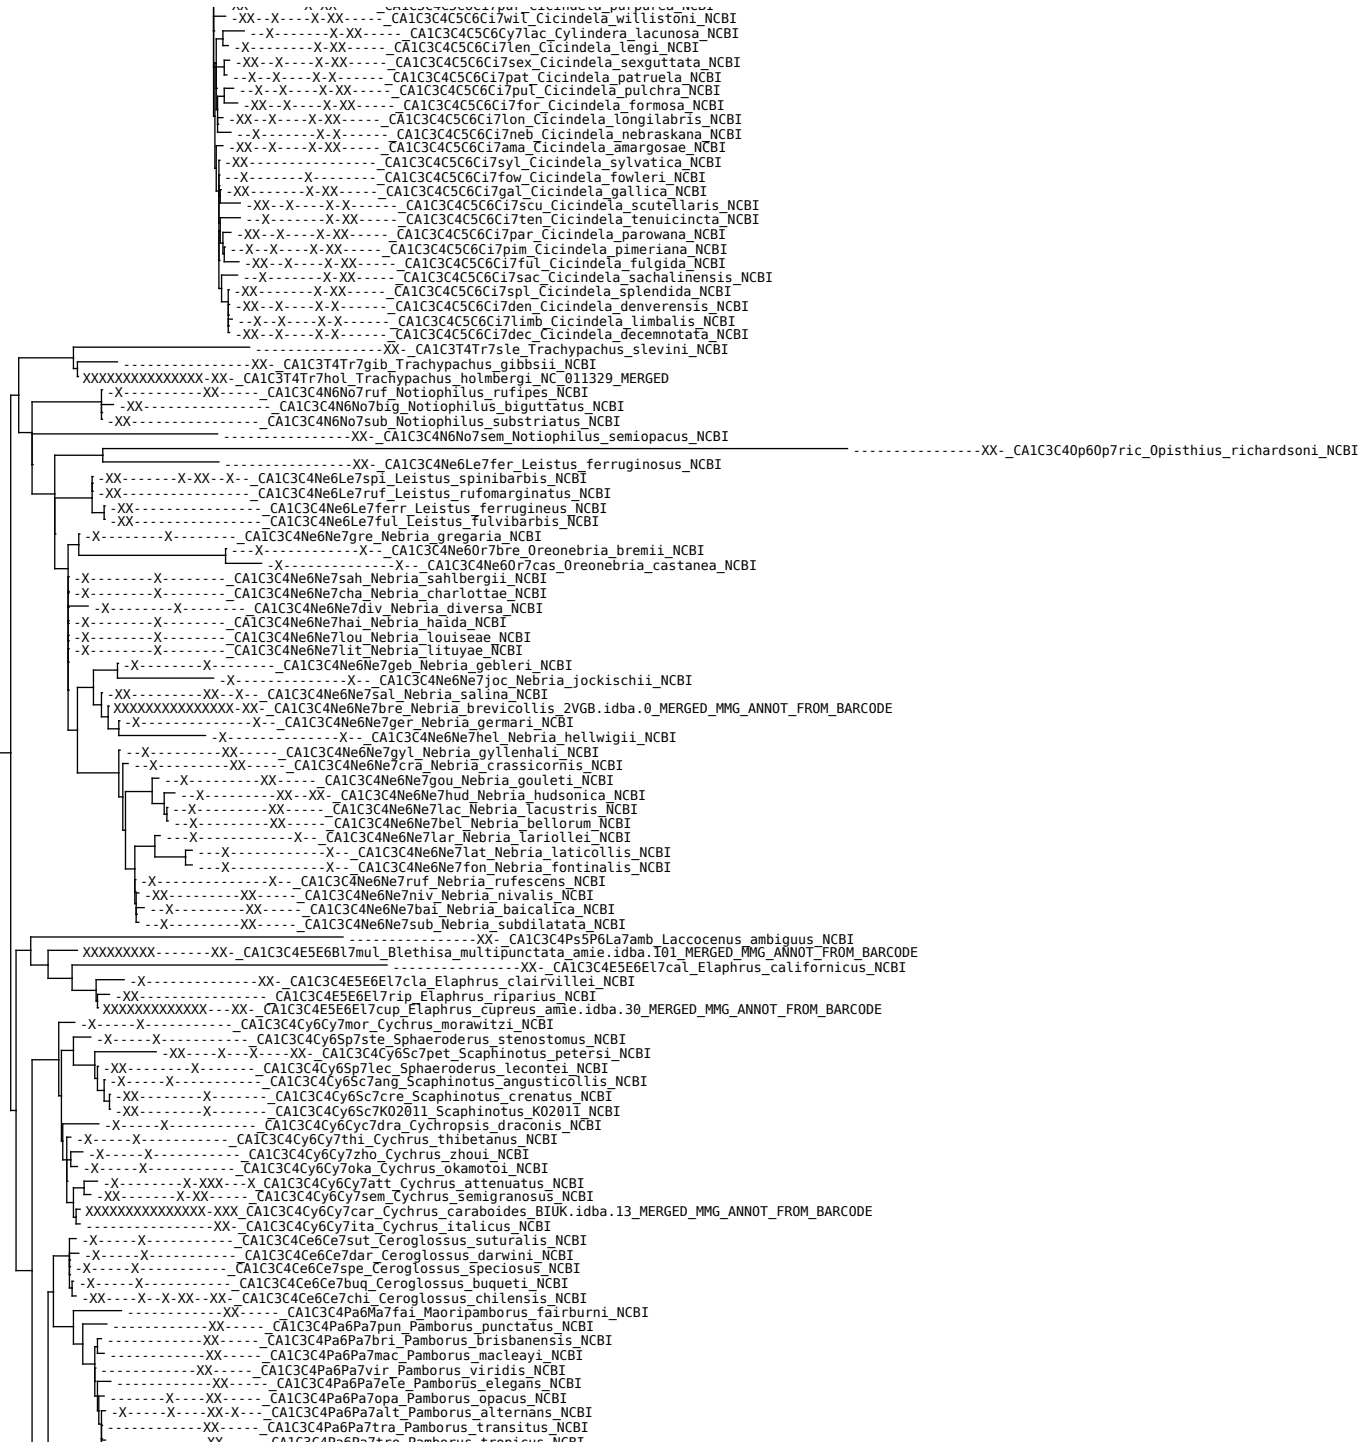

-----XX-----CA1C3C4Pa6Pa7sub\_Pamborus\_subtropicus\_NCBI  
-----XX-----CA1C3C4Pa6Pa7pra\_Pamborus\_pradierii\_NCBI  
-----XX-XX-CA1C3C4Pa6Pa7gue\_Pamborus\_guerinii\_NCBI  
-X-----X-----CA1C3C4Ca6Ca7gra\_Calosoma\_granatense\_NCBI  
-X-----X-----XX-CA1C3C4Ca6Ca7inq\_Calosoma\_inquisitor\_NCBI  
-X-----X-----CA1C3C4Ca6Ca7lel\_Calosoma\_leleuporum\_NCBI  
-X-----X-----CA1C3C4Ca6Ca7wil\_Calosoma\_wilcoxii\_NCBI  
-X-----X-----CA1C3C4Ca6Ca7mac\_Calosoma\_macrum\_NCBI  
-X-----X-----CA1C3C4Ca6Ca7lin\_Calosoma\_lineali\_NCBI  
-X-----X-----CA1C3C4Ca6Ca7gal\_Calosoma\_galapageium\_NCBI  
-----XX-CA1C3C4Ca6Ca7arr\_Calosoma\_arrowi\_NCBI  
-----XX-CA1C3C4Ca6Ca7sch\_Calosoma\_schayeri\_NCBI  
-XX---X-X-XX-CA1C3C4Ca6Cam7aur\_Campalita\_aupunctatum\_NCBI  
-XX-----X-XX-X-CA1C3C4Ca6Ca7bre\_Calosoma\_breviusculus\_NCBI  
-XX---X-X-XX-XX-CA1C3C4Ca6Ca7syc\_Calosoma\_sycophanta\_NCBI  
-X-----X-X-XX-XX-CA1C3C4Ca6Ca7schr\_Calosoma\_scrutator\_NCBI  
XXXXXXXXXXXXXXXXX-CA1C3C4Ca6Ca7BYUC0241\_Calosoma\_BYUC0241\_NCBI  
XXXXXXXXXXXXXXXXX-CA1C3C4Ca6Ca7sp\_NC\_018339  
-X-----X-XXX-X-CA1C3C4Ca6Ca7arc\_Carabus\_arcaeus\_NCBI  
-X-----X-X-XXX-XX-CA1C3C4Ca6Ca7int\_Carabus\_intricatus\_NCBI  
-X-----X-X-XXX-XX-CA1C3C4Ca6Ca7nod\_Carabus\_nodosus\_NCBI  
-XX-----CA1C3C4Ca6Ca7cre\_Carabus\_creutzeri\_NCBI  
-XX---X-X-XXX-XX-CA1C3C4Ca6Ca7irr\_Carabus\_irregularis\_NCBI  
-----XX-----CA1C3C4L15C6Ch7nem\_Chlaenius\_nemoralis\_NCBI  
-XX---X-X-XXX-X-CA1C3C4Ca6Ca7dep\_Carabus\_depressus\_NCBI  
-X-----X-XXX-XX-CA1C3C4Ca6Ca7yua\_Carabus\_yuae\_NCBI  
-----X-XXX-XX-CA1C3C4Ca6Ca7cen\_Carabus\_cenwangensis\_NCBI  
-X-----X-XXX-X-CA1C3C4Ca6Ca7koua\_Carabus\_kouanping\_NCBI  
-X-----X-XXX-X-CA1C3C4Ca6Ca7sky\_Carabus\_skyaphilus\_NCBI  
-X-----X-XXX-XX-CA1C3C4Ca6Ca7jin\_Carabus\_jingzhongensis\_NCBI  
-XX---X-X-XXX-XX-CA1C3C4Ca6Ca7cla\_Carabus\_clathratus\_NCBI  
-X-----X-----XX-CA1C3C4Ca6Ca7mae\_Carabus\_maeander\_NCBI  
-----X-----XX-CA1C3C4Ca6Ca7mac\_Carabus\_macleayi\_NCBI  
-X-----X-X-XXX-CA1C3C4Ca6Ca7nit\_Carabus\_nitens\_NCBI  
-X-----X-X-XXX-XX-CA1C3C4Ca6Ca7aura\_Carabus\_auratus\_NCBI  
-XX---X-X-XXX-XX-CA1C3C4Ca6Ca7cance\_Carabus\_cancellatus\_NCBI  
-X-----X-X-XXX-XX-CA1C3C4Ca6Ca7lat\_Carabus\_latreilleanus\_NCBI  
-XX---X-X-XXX-XX-CA1C3C4Ca6Ca7mel\_Carabus\_melancholicus\_NCBI  
-X-----X-X-XXX-XX-CA1C3C4Ca6Ca7cristo\_Carabus\_cristoforii\_NCBI  
-X-----X-X-XXX-XX-CA1C3C4Ca6Ca7gal\_Carabus\_galicianus\_NCBI  
-----X-X-XXX-X-CA1C3C4Ca6Ca7sten\_Carabus\_stenocephalus\_NCBI  
-----X-X-X-CA1C3C4Ca6Ca7asp\_Carabus\_asperatus\_NCBI  
-XXX---X-X-XXX-XX-CA1C3C4Ca6Ca7abb\_Carabus\_abbreviatus\_NCBI  
-XX---X-X-XXX-X-CA1C3C4Ca6Ca7fam\_Carabus\_famini\_NCBI  
-X-----X-X-XXX-X-CA1C3C4Ca6Ca7gen\_Carabus\_genei\_NCBI  
-X-----X-----CA1C3C4Ca6Ca7kyu\_Carabus\_kyushuensis\_NCBI  
-X-----X-----CA1C3C4Ca6Ca7pro\_Carabus\_procerulus\_NCBI  
-X-----X-----CA1C3C4Ca6Ca7arb\_Carabus\_arboreus\_NCBI  
-X-----X-----CA1C3C4Ca6Ca7hiu\_Carabus\_hiurai\_NCBI  
-X-----X-----CA1C3C4Ca6Ca7kum\_Carabus\_kumagaii\_NCBI  
-X-----X-XXX-X-CA1C3C4Ca6Ca7rei\_Carabus\_reitterianus\_NCBI  
-X-----X-----CA1C3C4Ca6Ca7kor\_Carabus\_koreanus\_NCBI  
-X-----X-X-XXX-X-CA1C3C4Ca6Ca7tit\_Carabus\_titanus\_NCBI  
-X-----X-X-XXX-X-CA1C3C4Ca6Ca7sei\_Carabus\_seishinensis\_NCBI  
-X-----X-----CA1C3C4Ca6Ca7can\_Carabus\_canaliculatus\_NCBI  
-X-----X-X-XXX-X-CA1C3C4Ca6Ca7sem\_Carabus\_semiopacus\_NCBI  
-X-----X-X-XXX-CA1C3C4Ca6Ca7laot\_Carabus\_laotse\_NCBI  
-----X-XXX-X-CA1C3C4Ca6Ca7yok\_Carabus\_yokoei\_NCBI  
-X-----X-X-XXX-X-CA1C3C4Ca6Ca7cate\_Carabus\_cateniger\_NCBI  
-X-----X-X-XXX-X-CA1C3C4Ca6Ca7mik\_Carabus\_mikhaili\_NCBI  
-X-----X-XXX-X-CA1C3C4Ca6Ca7grac\_Carabus\_gracilicollis\_NCBI  
-X-----X-XXX-X-CA1C3C4Ca6Ca7xie\_Carabus\_xiei\_NCBI  
-X-----X-XXX-X-CA1C3C4Ca6Ca7lad\_Carabus\_ladygini\_NCBI  
-X-----X-X-XXX-X-CA1C3C4Ca6Ca7rob\_Carabus\_roborowskii\_NCBI  
-X-----X-X-XXX-X-CA1C3C4Ca6Ca7bud\_Carabus\_buddaicus\_NCBI  
-X-----X-XX-X-CA1C3C4Ca6Ca7pyr\_Carabus\_pyrenaeus\_NCBI  
-----XX-CA1C3C4Ca6Ca7lin\_Carabus\_linmaei\_NCBI  
-XXX-X-X-XXX-X-CA1C3C4Ca6Ca7aur\_Carabus\_auronitens\_NCBI  
-X-X-X-X-XXX-CA1C3C4Ca6Ca7his\_Carabus\_hispanus\_NCBI  
-XXX-X-X-XXX-X-CA1C3C4Ca6Ca7rut\_Carabus\_rutilans\_NCBI  
-X-X-X-X-XXX-X-CA1C3C4Ca6Ca7line\_Carabus\_lineatus\_NCBI  
-X-X-X-XX-CA1C3C4Ca6Ca7pum\_Carabus\_pumilioauratus\_NCBI  
-X-X-X-X-XXX-X-CA1C3C4Ca6Ca7spl\_Carabus\_splendens\_NCBI  
-----X-X-X-CA1C3C4Ca6Ca7oly\_Carabus\_olympiae\_NCBI  
-XXXXXXXXXXXXXXXX-XX-CA1C3C4Ca6Ca7nem\_Carabus\_nemoralis\_BIUK.idba.47\_MERGED\_MMG\_ANNOT\_FROM\_BARCODE  
-X-----X-XXX-X-CA1C3C4Ca6Ca7pse\_Carabus\_pseudomonticola\_NCBI  
-X-----X-XXX-X-CA1C3C4Ca6Ca7pho\_Carabus\_phoenix\_NCBI  
-XX-----X-XX-CA1C3C4Ca6Ca7steu\_Carabus\_steuartii\_NCBI  
-X-----X-X-XXX-X-CA1C3C4Ca6Ca7gra\_Carabus\_granulatus\_NCBI  
-XX---X-X-XXX-X-CA1C3C4Ca6Ca7dey\_Carabus\_deyrollei\_NCBI  
-X-X-X-X-XXX-X-CA1C3C4Ca6Ca7arv\_Carabus\_arvensis\_NCBI  
-X-----X-----CA1C3C4Ca6Ca7sol\_Carabus\_solieri\_NCBI  
-X-----X-X-XXX-X-CA1C3C4Ca6Ca7cat\_Carabus\_catenulatus\_NCBI  
-X-----X-X-XXX-XX-CA1C3C4Ca6Ca7niti\_Carabus\_nitididorsus\_NCBI  
-XX-----CA1C3C4Ca6Ca7alp\_Carabus\_alpestris\_NCBI  
-X-----X-----CA1C3C4Ca6Ca7ste\_Carabus\_sternbergi\_NCBI  
-X-----X-XXX-X-CA1C3C4Ca6Ca7ola\_Carabus\_olafi\_NCBI  
-----X-XXX-CA1C3C4Ca6Ca7boy\_Carabus\_boysi\_NCBI  
-XX---X-X-XXX-X-X-CA1C3C4Ca6Ca7moni\_Carabus\_monilis\_NCBI  
-XXX-X-X-XXX-X-CA1C3C4Ca6Ca7mor\_Carabus\_morbillosus\_NCBI  
-X-----XXX-X-CA1C3C4Ca6Ca7pla\_Carabus\_planatus\_NCBI  
-X-----X-----CA1C3C4Ca6Ca7giga\_Carabus\_gigas\_NCBI  
-X-----X-----CA1C3C4Ca6Ca7ger\_Carabus\_germarii\_NCBI  
-XX---X-X-XX-CA1C3C4Ca6Ca7rug\_Carabus\_rugosus\_NCBI  
-XX---X-X-XXX-X-CA1C3C4Ca6Ca7cor\_Carabus\_coriaceus\_NCBI  
-X-----X-X-XXX-X-CA1C3C4Ca6Ca7syr\_Carabus\_syrus\_NCBI  
-----X-XXX-X-CA1C3C4Ca6Ca7sid\_Carabus\_sidonius\_NCBI  
-----X-XXX-X-CA1C3C4Ca6Ca7saul\_Carabus\_saulcyi\_NCBI  
-X-X-XXX-X-CA1C3C4Ca6Ca7hem\_Carabus\_hemprichi\_NCBI

-X-----X-XXX--X\_CAI13C4Ca6Ca7imp\_Carabus\_impresus\_NCBI  
-----X-XXX--X\_CAI13C4Ca6Ca7pioC\_Carabus\_piochardi\_NCBI  
-----X-XXX--X\_CAI13C4Ca6Ca7mora\_Carabus\_morawitzi\_NCBI  
-X-----X-XXX--X\_CAI13C4Ca6Ca7syrii\_Carabus\_syriacus\_NCBI  
-X-----X-XXX--X\_CAI13C4Ca6Ca7cae\_Carabus\_caelatus\_NCBI  
-XX---X-X-XXX--X\_CAI13C4Ca6Ca7vio\_Carabus\_violaceus\_NCBI  
XXXXXXXXXXXXX-X-----X\_CAI13C4Ca6Ca7mira\_Carabus\_mirabilissimus\_NCBI  
XXXXXXXXXXXXX-X-----X\_CAI13C4Ca6Ca7 Damaster\_mirabilissimus\_NC\_016469  
-X-----X-----X\_CAI13C4Ca6Ca7bla\_Carabus\_blaptoides\_NCBI  
-X-----X-----X\_CAI13C4Ca6Ca7sma\_Carabus\_smaragdinus\_NCBI  
-X-----X-----X\_CAI13C4Ca6Ca7jan\_Carabus\_jankowskii\_NCBI  
-X-----X-XXX--X\_CAI13C4Ca6Ca7prz\_Carabus\_przewalskii\_NCBI  
-X-----X-XXX-XXX\_CAI13C4Ca6Ca7gan\_Carabus\_gansuensis\_NCBI  
-X-----X-XXX--X\_CAI13C4Ca6Ca7hua\_Carabus\_huangi\_NCBI  
-X-----X-XXX--X\_CAI13C4Ca6Ca7sack\_Carabus\_sackeni\_NCBI  
-X-----X-XXX--X\_CAI13C4Ca6Ca7nans\_Carabus\_nanshanicus\_NCBI  
-X-----X-XXX--X\_CAI13C4Ca6Ca7tib\_Carabus\_tibetanophilus\_NCBI  
-X-----X-XXX--X\_CAI13C4Ca6Ca7qui\_Carabus\_quinlani\_NCBI  
-X-----X-XXX--X\_CAI13C4Ca6Ca7tama\_Carabus\_tamang\_NCBI  
-X-----X-X-XXX--X\_CAI13C4Ca6Ca7linn\_Carabus\_linnaei\_NCBI  
-X-----X-X-XXX--X\_CAI13C4Ca6Ca7conv\_Carabus\_convexus\_NCBI  
-X-----X-XXX--X\_CAI13C4Ca6Ca7frum\_Carabus\_fumelicus\_NCBI  
-X-----X-X-XXX--X\_CAI13C4Ca6Ca7fra\_Carabus\_fratriculus\_NCBI  
-X-----X-----X\_CAI13C4Ca6Ca7tae\_Carabus\_taedatus\_NCBI  
-XX---X-X-XXX--X\_CAI13C4Ca6Ca7fai\_Carabus\_fairmairei\_NCBI  
-XX---X-X-XXX--X\_CAI13C4Ca6Ca7conco\_Carabus\_concolor\_NCBI  
-XX---X-----X\_CAI13C4Ca6Ca7sylv\_Carabus\_sylvestris\_NCBI  
-X-----X-XXX--X\_CAI13C4Ca6Ca7bau\_Carabus\_baudii\_NCBI  
-X-----X-XXX--X\_CAI13C4Ca6Ca7ped\_Carabus\_pedemontanus\_NCBI  
-XX---X-XX-X--X\_CAI13C4Ca6Ca7duf\_Carabus\_dufouri\_NCBI  
XXXXX-X-X-XXX-X-X\_CAI13C4Ca6Ca7prob\_Carabus\_problematicus\_BIUK\_idba.82\_MERGED\_MMG\_ANNOT\_FROM\_BARCODE  
-XX---X-XXX-X-X\_CAI13C4Ca6Ca7lus\_Carabus\_lusitanicus\_NCBI  
-XX---X-XX-X--X\_CAI13C4Ca6Ca7macr\_Carabus\_macrocephalus\_NCBI  
-X-----X-XXX--X\_CAI13C4Ca6Ca7cant\_Carabus\_cantabricus\_NCBI  
-XX---X-XX-XX--X\_CAI13C4Ca6Ca7rif\_Carabus\_riffensis\_NCBI  
-XX---X-XX-X--X\_CAI13C4Ca6Ca7gua\_Carabus\_guadarramus\_NCBI  
-XX---X-XX--X\_CAI13C4Ca6Ca7ghi\_Carabus\_ghiliani\_NCBI  
-XX---X-XXX-X-X\_CAI13C4Ca6Ca7amp\_Carabus\_amplipennis\_NCBI  
-X-----X-XXX--X\_CAI13C4Ca6Ca7gla\_Carabus\_glabratus\_NCBI  
-X-----X-X-XXX--X\_CAI13C4Ca6Ca7hor\_Carabus\_hortensis\_NCBI  
-X-----X-XX--X\_CAI13C4Ca6Ca7deh\_Carabus\_dehaanii\_NCBI  
-X-----X-XX--X\_CAI13C4Ca6Ca7jap\_Carabus\_japonicus\_NCBI  
-X-----X-XX--X\_CAI13C4Ca6Ca7yam\_Carabus\_yamato\_NCBI  
-X-----X-XX--X\_CAI13C4Ca6Ca7dai\_Carabus\_daiseni\_NCBI  
-X-----X-XX--X\_CAI13C4Ca6Ca7kim\_Carabus\_kimurii\_NCBI  
-X-----X-XX--X\_CAI13C4Ca6Ca7alb\_Carabus\_albrechti\_NCBI  
-X-----X-XX--X\_CAI13C4Ca6Ca7lew\_Carabus\_lewisianus\_NCBI  
-X-----X-XX--X\_CAI13C4Ca6Ca7yac\_Carabus\_yaconinus\_NCBI  
-X-----X-XX--X\_CAI13C4Ca6Ca7iwa\_Carabus\_iwakianus\_NCBI  
-X-----X-XX--X\_CAI13C4Ca6Ca7tesa\_Carabus\_esakii\_NCBI  
-X-----X-XX--X\_CAI13C4Ca6Ca7arr\_Carabus\_arrowianus\_NCBI  
-X-----X-XX--X\_CAI13C4Ca6Ca7ins\_Carabus\_insulicola\_NCBI  
-X-----X-XX--X\_CAI13C4Ca6Ca7uen\_Carabus\_uenoi\_NCBI  
-X-----X-XX--X\_CAI13C4Ca6Ca7mai\_Carabus\_malyasanus\_NCBI  
-----XX--CAI13T4S7ybre\_Systolosoma\_breve\_NCBI  
-----XX--CAI13T4S7y7lat\_Systolosoma\_lateritum\_NCBI  
-----XX--CAI13C4Br6Br7rel\_Brosocosoma\_relictum\_NCBI  
-----XX--CAI13C4Br6Pr7bru\_Promecoderus\_brunnicornis\_NCBI  
-----XX--CAI13C4Br6Cr7eyd\_Creobius\_eydoudii\_NCBI  
-XX-----X-----X\_CAI13C4Br6Ch7ate\_Chylnus\_ater\_NCBI  
-X-----X-----X\_CAI13C4Br6Me7imp\_Mecodema\_impresum\_NCBI  
-X-----X-----X\_CAI13C4Br6D17obt\_Diglymma\_obtusum\_NCBI  
-XX-----XX--X--X\_CAI13C4Br6D17cli\_Diglymma\_clivinoides\_NCBI  
-XX-----XX--XX--X\_CAI13C4Br6D7aer\_Oregus\_aereus\_NCBI  
-X-----X-----X\_CAI13C4Br6Me7inf\_Mecodema\_infimata\_NCBI  
-X-----X-----X\_CAI13C4Br6Me7cren\_Mecodema\_crenaticolle\_NCBI  
-X-----X-----X\_CAI13C4Br6Me7duc\_Mecodema\_ducale\_NCBI  
-XX-----XX--X\_CAI13C4Br6Me7cre\_Mecodema\_crenicolle\_NCBI  
-X-----X-----X\_CAI13C4Br6Me7min\_Mecodema\_minax\_NCBI  
-X-----X-----X\_CAI13C4Br6Me7elo\_Mecodema\_elongatum\_NCBI  
-XX-----XX--X\_CAI13C4Br6Met7mon\_Metaglymma\_moniliforme\_NCBI  
-XX-----XX--X\_CAI13C4Br6Me7ore\_Mecodema\_oregoides\_NCBI  
-X-----XX--X\_CAI13C4Br6Me7MB511\_1\_Mecodema\_MB511\_NCBI  
-XX-----XX--X\_CAI13C4Br6Me7sul\_Mecodema\_sulcatum\_NCBI  
-X-----X-----X\_CAI13C4Br6Bru7ant\_Brullea\_antarctica\_NCBI  
-XX-----XX--X\_CAI13C4Br6Me7occ\_Mecodema\_occipitale\_NCBI  
-XX-----XX--X\_CAI13C4Br6Me7cur\_Mecodema\_curvidens\_NCBI  
-XX-----XX--X\_CAI13C4Br6Me7str\_Mecodema\_strictum\_NCBI  
-XX-----XX--X\_CAI13C4Br6Me7rug\_Mecodema\_rugiceps\_NCBI  
-X-----X-----X\_CAI13C4Br6Me7met\_Mecodema\_metallicum\_NCBI  
-XX-----XX--X\_CAI13C4Br6Me7lon\_Mecodema\_longicolle\_NCBI  
-XX-----XX--X\_CAI13C4Br6Me7alt\_Mecodema\_alternans\_NCBI  
-X-----X-----X\_CAI13C4Br6Me7con\_Mecodema\_constrictum\_NCBI  
-XX-----XX--X\_CAI13C4Br6Me7how\_Mecodema\_howittii\_NCBI  
-X-----X-----X\_CAI13C4Br6Me7MB73\_Mecodema\_MB73\_NCBI  
-XX-----XX--X\_CAI13C4Br6Me7spi\_Mecodema\_spinifer\_NCBI  
-X-----X-----X\_CAI13C4Br6Me7MB21\_Mecodema\_MB21\_NCBI  
-X-----X-----X\_CAI13C4Br6Me7MB37\_1\_Mecodema\_MB37\_NCBI  
-XX-----XX--X\_CAI13C4Br6Me7MB23\_Mecodema\_MB23\_NCBI  
-XX-----XX--X\_CAI13C4Br6Me7MB91\_Mecodema\_MB91\_NCBI  
-XX-----XX--XX--X\_CAI13C4Br6Me7ful\_Mecodema\_fulgidum\_NCBI  
-XX-----XX--X\_CAI13C4Br6Me7sim\_Mecodema\_simplex\_NCBI  
-X-----X-----X\_CAI13C4Br6Me7cos\_Mecodema\_costellum\_NCBI  
-XX-----XX--X\_CAI13C4Br6Me7val\_Mecodema\_validum\_NCBI  
-XX-----XX--X\_CAI13C4Br6Me7luc\_Mecodema\_lucidum\_NCBI  
-X-----X-----X\_CAI13C4Br6Me7MB124\_Mecodema\_MB124\_NCBI  
-X-----X-----X\_CAI13C4Br6Me7hut\_Mecodema\_huttense\_NCBI  
-XX-----XX--X\_CAI13C4Br6Me7scu\_Mecodema\_sculpturatum\_NCBI  
-XX-----XX--X\_CAI13C4Br6Me7MB11\_Mecodema\_MB11\_NCBI  
-----XX--CAI13C4Pr5D6Da7mir\_Dalyat\_mirabilis\_NCBI



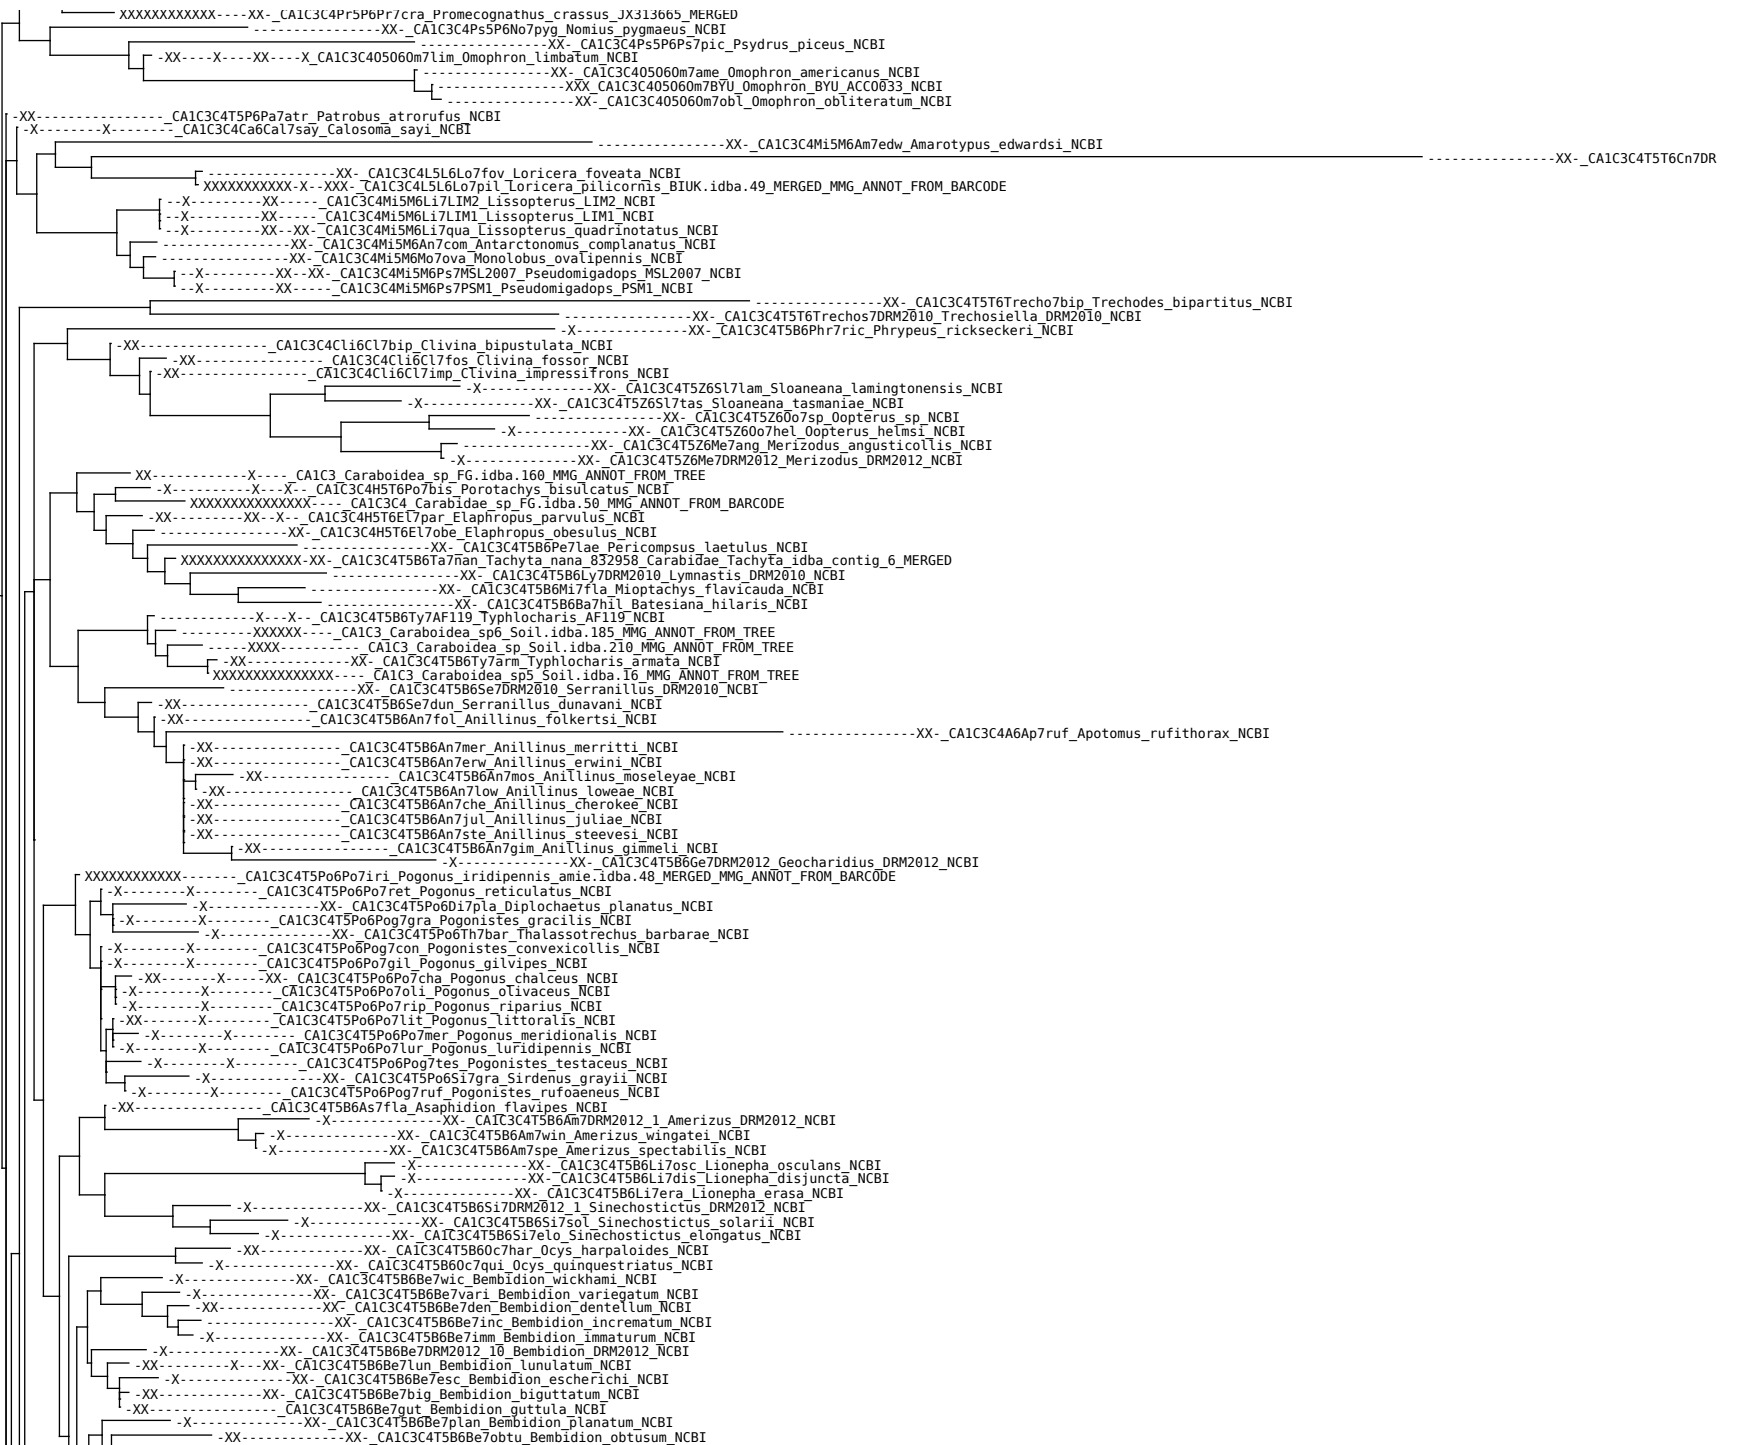

-X-----XX- CA1C3C4T5B6A57yuk Asaphidion yukonense NCBI  
-X-----XX- CA1C3C4T5B6A57ala Asaphidion alaskanum NCBI  
-X-----XX- CA1C3C4T5B6A57DRM2012\_1 Asaphidion DRM2012 NCBI  
-X-----XX- CA1C3C4T5B6A57cur Asaphidion curtum NCBI  
-X-----XX- CA1C3C4T5B6Be7DRM2012\_3 Bembidion DRM2012 NCBI  
-X-----XX- CA1C3C4T5B6Be7DRM2012\_2 Bembidion DRM2012 NCBI  
-X-----XX- CA1C3C4T5B6Be7tre Bembidion trechiforme NCBI  
-X-----XX- CA1C3C4T5B6Be7iri Bembidion iridescens NCBI  
-X-----XX- CA1C3C4T5B6Be7dar Bembidion darlingtoniolum NCBI  
-X-----XX- CA1C3C4T5B6Be7hor Bembidion horni NCBI  
-X-----XX- CA1C3C4T5B6Be7mun Bembidion mundum NCBI  
-X-----XX- CA1C3C4T5B6Be7ori Bembidion orion NCBI  
-X-----XX- CA1C3C4T5B6Be7coo Bembidion cooperi NCBI  
-X-----XX- CA1C3C4T5B6Be7fes Bembidion festivum NCBI  
-X-----XX- CA1C3C4T5B6Be7inte Bembidion interventor NCBI  
-X-----XX- CA1C3C4T5B6Be7levi Bembidion levigatum NCBI  
-X-----XX- CA1C3C4T5B6Be7lur Bembidion luridicorne NCBI  
-X-----XX- CA1C3C4T5B6Be7pro Bembidion properans NCBI  
-X-----XX- CA1C3C4T5B6Be7art Bembidion articulatum NCBI  
-X-----XX- CA1C3C4T5B6Be7dori Bembidion doris NCBI  
-X-----XX- CA1C3C4T5B6Be7DRM2012\_I4 Bembidion DRM2012 NCBI  
-X-----XX- CA1C3C4T5B6Be7mime Bembidion mimekara NCBI  
-X-----XX- CA1C3C4T5B6Be7pla Bembidion planum NCBI  
-X-----XX- CA1C3C4T5B6Be7brev Bembidion breve NCBI  
-X-----XX- CA1C3C4T5B6Be7kup Bembidion kupianovii NCBI  
-X-----XX- CA1C3C4T5B6Be7has Bembidion hastii NCBI  
-X-----XX- CA1C3C4T5B6Be7sim Bembidion simplex NCBI  
-X-----XX- CA1C3C4T5B6Be7sti Bembidion stillaguamish NCBI  
-X-----XX- CA1C3C4T5B6Be7geb Bembidion gebleri NCBI  
-X-----XX- CA1C3C4T5B6Be7pra Bembidion prasinum NCBI  
-X-----XX- CA1C3C4T5B6Be7bas Bembidion basicorne NCBI  
-X-X-----CA1C3C4T5B6Be7pal Bembidion pallidipenne NCBI  
-X-----XX- CA1C3C4T5B6Be7lat Bembidion laterale NCBI  
-XX-----CA1C3C4T5B6Be7tib Bembidion tibiata NCBI  
XXXXXXXXXXXXXX-CA1C3C4T5B6Be7lae Bembidion laetum\_Soili.idba.40\_MERGED\_MMG\_ANNOT\_FROM\_BARCODE  
-X-----XX- CA1C3C4T5B6Be7rufi Bembidion rufum NCBI  
-XX-----XX- CA1C3C4T5B6Be7punc Bembidion punctulatum NCBI  
-X-----XX- CA1C3C4T5B6Be7mck Bembidion mckinleyi NCBI  
-X-----XX- CA1C3C4T5B6Be7bim Bembidion bimaculatum NCBI  
-XX-----XX- CA1C3C4T5B6Be7tetr Bembidion tetracolum NCBI  
-XX-----CA1C3C4T5B6Be7fem Bembidion femoratum NCBI  
-XX-X-----CA1C3C4T5B6Be7his Bembidion hispanicum NCBI  
-XX-----CA1C3C4T5B6Be7del Bembidion deletum NCBI  
-X-----XX- CA1C3C4T5B6Be7DRM2012\_15 Bembidion DRM2012 NCBI  
-X-----XX- CA1C3C4T5B6Be7lia Bembidion liangi NCBI  
-X-----XX- CA1C3C4T5B6Be7ast Bembidion astrabadense NCBI  
-X-----XX- CA1C3C4T5B6Be7geni Bembidion geniculatum NCBI  
-X-----XX- CA1C3C4T5B6Be7len Bembidion lenae NCBI  
-XX-----XX- CA1C3C4T5B6Be7dec Bembidion decorum NCBI  
-XX-----CA1C3C4T5B6Be7atr Bembidion atrocaeruleum NCBI  
-XX-----XX- CA1C3C4T5B6Be7gen Bembidion genei NCBI  
-X-----XX- CA1C3C4T5B6Be7plat Bembidion platynoides NCBI  
-X-----XX- CA1C3C4T5B6Be7grap Bembidion grapii NCBI  
-X-----XX- CA1C3C4T5B6Be7pplag Bembidion plagiatum NCBI  
-X-----XX- CA1C3C4T5B6Be7comm Bembidion commotum NCBI  
-XX-----XX- CA1C3C4T5B6Be7mex Bembidion mexicanum NCBI  
-XX-XX-----CA1C3C4T5B6Be7lug Bembidion lugubre NCBI  
-XX-----XXX-CA1C3C4T5B6Be7pers Bembidion perspicuum NCBI  
-XX-----XX- CA1C3C4T5B6Be7tig Bembidion tigrinum NCBI  
-XX-----XX- CA1C3C4T5B6Be7trans Bembidion transversale NCBI  
-X-----XX- CA1C3C4T5B6Be7fro Bembidion frontale NCBI  
-X-----XX- CA1C3C4T5B6Be7conn Bembidion connivens NCBI  
-X-----XX- CA1C3C4T5B6Be7pse Bembidion pseudocautum NCBI  
-X-----XX- CA1C3C4T5B6Be7for Bembidion fortestriatum NCBI  
-X-----XX- CA1C3C4T5B6Be7tet Bembidion tetrapholeon NCBI  
-XX-----XX- CA1C3C4T5B6Be7tuc Bembidion tucumanum NCBI  
-X-----XX- CA1C3C4T5B6Be7lon Bembidion lonae NCBI  
-X-----XX- CA1C3C4T5B6Be7ebu Bembidion eburneonigrum NCBI  
-X-----XX- CA1C3C4T5B6Be7sali Bembidion salinarium NCBI  
-X-----XX- CA1C3C4T5B6Be7nigr1 Bembidion nigrivestis NCBI  
-XX-----XX- CA1C3C4T5B6Be7ass Bembidion assimile NCBI  
-XXX-----CA1C3C4T5B6Be7fum Bembidion fumigatum NCBI  
-X-----XX- CA1C3C4T5B6Be7anth Bembidion anthracinum NCBI  
-XX-----CA1C3C4T5B6Be7obl Bembidion obliquum NCBI  
-XX-----CA1C3C4T5B6Be7sem Bembidion semipunctatum NCBI  
-X-----XX- CA1C3C4T5B6Be7DRM2012\_7 Bembidion DRM2012 NCBI  
-X-----XX- CA1C3C4T5B6Be7phl Bembidion philippii NCBI  
-X-----XX- CA1C3C4T5B6Be7mel Bembidion melanopodum NCBI  
-X-----XX- CA1C3C4T5B6Be7rug Bembidion rugosellum NCBI  
-XX-----XX- CA1C3C4T5B6Be7gil Bembidion gilvipes NCBI  
-X-----XX- CA1C3C4T5B6Be7sex Bembidion sexfoveatum NCBI  
-X-----XX- CA1C3C4T5B6Be7ago Bembidion agonoides NCBI  
-X-----XX- CA1C3C4T5B6Be7rog Bembidion rogersi NCBI  
-X-----XX- CA1C3C4T5B6Be7Men Bembidion Mendoza NCBI  
-X-----XX- CA1C3C4T5B6Be7geo Bembidion georgeballi NCBI  
-X-----XX- CA1C3C4T5B6Be7orr Bembidion orregoi NCBI  
-X-----XX- CA1C3C4T5B6Be7Cal Bembidion Cal NCBI  
-X-----XX- CA1C3C4T5B6Be7men Bembidion mendocinum NCBI  
-XX-----XX- CA1C3C4T5B6Be7DRM2012\_11 Bembidion DRM2012 NCBI  
-X-----XX- CA1C3C4T5B6Be7rufo Bembidion rufoplagiatum NCBI  
-X-----XX- CA1C3C4T5B6Be7mand Bembidion mandibulare NCBI  
-X-----XX- CA1C3C4T5B6Be7zan Bembidion zanettii NCBI  
-X-----XX- CA1C3C4T5B6Be7cao Bembidion caoduroi NCBI  
-XX-----XX- CA1C3C4T5B6Be7NOM1 Bembidion NOM1 NCBI  
-X-X-----CA1C3C4T5B6Be7ten Bembidion tenellum NCBI  
-X-----XX- CA1C3C4T5B6Be7sol Bembidion solieri NCBI  
-X-----XX- CA1C3C4T5B6Be7DRM2012\_1 Bembidion DRM2012 NCBI  
-X-----XX- CA1C3C4T5B6Be7ara Bembidion aratum NCBI  
-XX-----XX- CA1C3C4T5B6Be7rap Bembidion rapidum NCBI  
-X-----XX- CA1C3C4T5B6Be7sci Bembidion scintillans NCBI

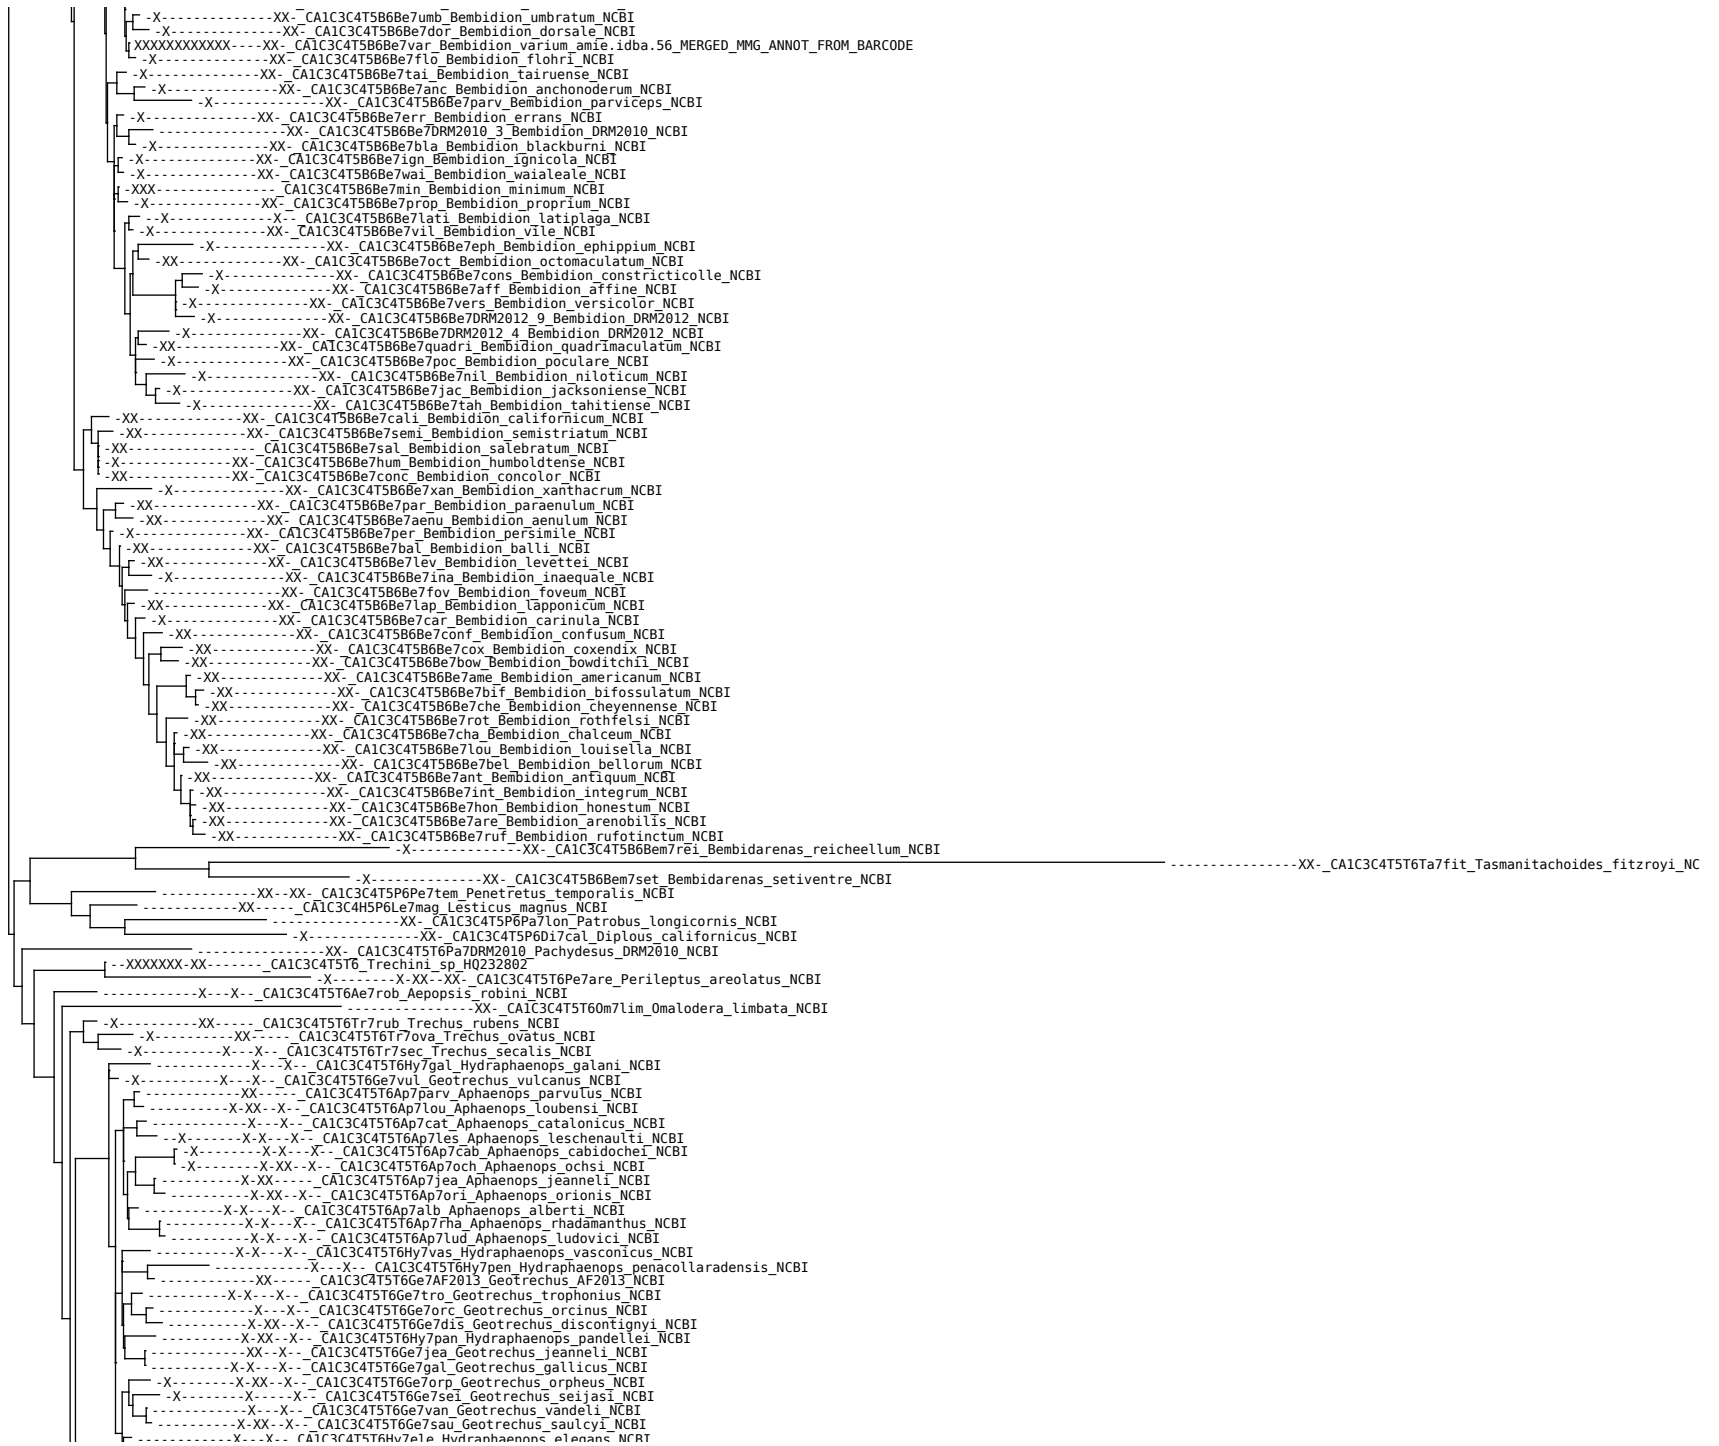

-----X-X-X- CA1C3C4T5T6Hy7coi Hydraphaenops\_coiffaiti NCBI  
-----X-X-X- CA1C3C4T5T6Hy7pec Hydraphaenops\_pecoudi NCBI  
-----X-XX-X- CA1C3C4T5T6Hy7ehl Hydraphaenops\_ehlersi NCBI  
-----X-X-X- CA1C3C4T5T6Ap7mic Aphaenops\_michaeli NCBI  
-----X-X-X- CA1C3C4T5T6Ap7del Aphaenops\_delbreili NCBI  
-----X-X-X- CA1C3C4T5T6Ap7bon Aphaenops\_bonneti NCBI  
-----X-X-X- CA1C3C4T5T6Ap7hus Aphaenops\_hustachei NCBI  
-----X-XX-X- CA1C3C4T5T6Ap7cry Aphaenops\_crypticola NCBI  
-----X-X-X- CA1C3C4T5T6Ap7AF133 Aphaenops\_AF133 NCBI  
-----XX-X- CA1C3C4T5T6Ap7sio Aphaenops\_sioberae NCBI  
-----X-X-X- CA1C3C4T5T6Ap7par Aphaenops\_parallelus NCBI  
-----X-XX-X- CA1C3C4T5T6Ap7van Aphaenops\_vandeli NCBI  
-----X-X-X- CA1C3C4T5T6Ap7mar Aphaenops\_mariaerosae NCBI  
-----X-X-X- CA1C3C4T5T6Ap7lau Aphaenops\_laurenti NCBI  
-----X-X-X- CA1C3C4T5T6Ap7buc Aphaenops\_bucephalus NCBI  
-----XX-X- CA1C3C4T5T6Ap7AF134 Aphaenops\_AF134 NCBI  
-----X-X-X- CA1C3C4T5T6Ap7AF42 Aphaenops\_AF42 NCBI  
-----X-X-X- CA1C3C4T5T6Ap7plu Aphaenops\_pluto NCBI  
-----X-XX-X- CA1C3C4T5T6Ap7tir Aphaenops\_tiresias NCBI  
-----XX-X- CA1C3C4T5T6Ap7cha Aphaenops\_chappuisi NCBI  
-----X-XX-X- CA1C3C4T5T6Ap7cer Aphaenops\_cerberus NCBI  
-----X-XX-X- CA1C3C4T5T6Ap7jau Aphaenops\_jauzioni NCBI  
-----X-XX-X- CA1C3C4T5T6Tre7MSL20071 Trechisibus\_MSL20071 NCBI  
-----X-XX-X- CA1C3C4T5T6Tre7ant Trechisibus\_antarcticus NCBI  
-----XXXXXXXXXXXXX- 833174 Trechoblems\_sp\_idba\_contig\_26  
-----XX-X- CA1C3C4T5T6B17dis Blemus\_discus NCBI  
-----X-X-X-X- CA1C3C4T5T6Ib7bol Iberotrechus\_boilivari NCBI  
-----X-X-X- CA1C3C4T5T6I7bbs Trechus\_bastropi NCBI  
-----X-XX-X- CA1C3C4T5T6Do7cas Doderotrechus\_casalei NCBI  
-----X-XX-X- CA1C3C4T5T6Do7ghi Doderotrechus\_ghiliani NCBI  
-----X-XX-X- CA1C3C4T5T6Do7crl Doderotrechus\_crissolensis NCBI  
-----XX-X- CA1C3C4T5T6Ph7glo Pheggomisetes\_globiceps NCBI  
-----X-XX-X- CA1C3C4T5T6Tre7MSL20072 Trechisibus\_MSL20072 NCBI  
-----X-XX-X- CA1C3C4T5T6Du7ber Duvalius\_berthae NCBI  
-----X-XX-X- CA1C3C4T5T6Du7ray Duvalius\_raymondi NCBI  
-----X-XX-X- CA1C3C4T5T6Du7aub Duvalius\_auberti NCBI  
-----XX-X- CA1C3C4T5T6Du7luc Duvalius\_lucidus NCBI  
-----XX-X- CA1C3C4T5T6Du7bru Duvalius\_brujasii NCBI  
-----XX-X- CA1C3C4T5T6Du7din Duvalius\_diniensis NCBI  
-----X-X-X- CA1C3C4T5T6Ar7ang Arctaphaenops\_angulipennis NCBI  
-----XX-X- CA1C3C4T5T6Tri7gou Trichaphaenops\_gounellei NCBI  
-----XX-X- CA1C3C4T5T6Du7lon Duvalius\_longhii NCBI  
-----XX-X- CA1C3C4T5T6Du7win Duvalius\_wingelmuelleri NCBI  
-----X-XX-X- CA1C3C4T5T6Du7bol Duvalius\_boldorii NCBI  
-----XX-X- CA1C3C4T5T6Du7winK Duvalius\_winklerianus NCBI  
-----X-XX-X- CA1C3C4T5T6Du7goe Duvalius\_goemoeriensis NCBI  
-----X-XX-X- CA1C3C4T5T6Du7bok Duvalius\_bokori NCBI  
-----XX-X- CA1C3C4T5T6Du7del Duvalius\_deiphinensis NCBI  
-----XX-X- CA1C3C4T5T6An7tol Anophthalmus\_tolimensis NCBI  
-----XX-X- CA1C3C4T5T6An7sch Anophthalmus\_schatzmayri NCBI  
-----XX-X- CA1C3C4T5T6An7hir Anophthalmus\_hirtus NCBI  
-----X-XX-X- CA1C3C4T5T6An7schm Anophthalmus\_schmidti NCBI  
-----X-XX-X- CA1C3C4T5T6An7sco Anophthalmus\_scopoli NCBI  
-----XX-X- CA1C3C4T5T6An7rav Anophthalmus\_ravasinii NCBI  
-----XX-X- CA1C3C4T5T6An7AF2013 Anophthalmus\_AF2013 NCBI  
-----XX-X- CA1C3C4T5T6An7pre Anophthalmus\_pretneri NCBI  
-----X-X-X- CA1C3C4T5T6Ag7gau Agostinia\_gaudini NCBI  
-----XX-X- CA1C3C4T5T6Du7sza Duvalius\_szaboi NCBI  
-----X-XX-X- CA1C3C4T5T6Du7mic Duvalius\_microphthalmus NCBI  
-----X-XX-X- CA1C3C4T5T6Du7bal Duvalius\_baldensis NCBI  
-----X-X-X- CA1C3C4T5T6Du7bre Duvalius\_breui NCBI  
-----X-XX-X- CA1C3C4T5T6Du7con Duvalius\_convexicollis NCBI  
-----XX-X- CA1C3C4T5T6Du7eri Duvalius\_erichsonii NCBI  
-----X-X-X- CA1C3C4T5T6Du7rob Duvalius\_roberti NCBI  
-----XX-X- CA1C3C4T5T6Du7kli Duvalius\_klimai NCBI  
-----X-XX-X- CA1C3C4T5T6Du7dor Duvalius\_doriae NCBI  
-----XX-X- CA1C3C4T5T6Du7AF2013 Duvalius\_AF2013 NCBI  
-----XX-X- CA1C3C4T5T6Du7dod Duvalius\_doderoi NCBI  
-----XX-X- CA1C3C4T5T6Du7reg Duvalius\_regisborisi NCBI  
-----X-XX-X- CA1C3C4T5T6Du7ope Duvalius\_opermanni NCBI  
-----XX-X- CA1C3C4T5T6Du7exa Duvalius\_exaratus NCBI  
-----X-XX-X- CA1C3C4T5T6Du7les Duvalius\_lespesii NCBI  
-----XX-X- CA1C3C4T5T6Du7cad Duvalius\_cadurcus NCBI  
-----XX-X- CA1C3C4T5T6Du7gen Duvalius\_gentilei NCBI  
-----X-XX-X- CA1C3C4T5T6Du7can Duvalius\_canevae NCBI  
-----X-XX-X- CA1C3C4T5T6Du7sic Duvalius\_sicardi NCBI  
-----X-XX-X- CA1C3C4T5T6Du7per Duvalius\_perrinae NCBI  
-----X-XX-X- CA1C3C4T5T6Du7cai Duvalius\_cailloli NCBI  
-----X-XX-X- CA1C3C4T5T6Du7lan Duvalius\_lanai NCBI  
-----XX-X- CA1C3C4T5T6Ag7lau Agostinia\_launi NCBI  
-----XX-X- CA1C3C4T5T6Du7pec Duvalius\_pecoudi NCBI  
-----X-X-X- CA1C3C4T5T6Du7car Duvalius\_caranti NCBI  
-----X-XX-X- CA1C3C4T5T6Du7wai Duvalius\_waillyi NCBI  
-----X-XX-X- CA1C3C4T5T6Du7och Duvalius\_ochsi NCBI  
-----X-XX-X- CA1C3C4T5T6Ty7bil Typhlotrechus\_bilimekii NCBI  
-----X-XX-X- CA1C3C4T5T6Sa7sup Sardaphaenops\_supramontanus NCBI  
-----X-XX-X- CA1C3C4T5T6Sa7ade Sardaphaenops\_adelphus NCBI  
-----XX-X- CA1C3C4T5T6Tr7KA01997 Trechus\_KA01997 NCBI  
-----XX-X- CA1C3C4T5T6Tr7sch Trechus\_schaufussi NCBI  
-----XX-X- CA1C3C4T5T6Tr7fla Trechinotus\_flavocinctus NCBI  
-----X-XX-X- CA1C3C4T5T6Par7bre Paraphaenops\_breuilianus NCBI  
-----X-XX-X- CA1C3C4T5T6Tr7pia Trechus\_pazzoli NCBI  
-----X-XX-X- CA1C3C4T5T6Tr7sylv Trechus\_sylvicola NCBI  
-----XX-X- CA1C3C4T5T6Tr7AF2013 Trechus\_AF2013 NCBI  
-----XX-X- CA1C3C4T5T6Tr7laz Trechus\_lazicus NCBI  
-----XX-X- CA1C3C4T5T6Tr7pul Trechus\_pulchellus NCBI  
-----X-X-X- CA1C3C4T5T6Tr7ceb Trechus\_ceballosi NCBI  
-----X-XX-X- CA1C3C4T5T6Tr7dis Trechus\_distigma NCBI  
-----X-XX-X- CA1C3C4T5T6Tr7aube Trechus\_aubei NCBI  
-----X-XX-X- CA1C3C4T5T6Tr7hpa Trechus\_hesperus NCBI

XXXXXXXXXXXXXXXXXXXX CA1C3C4T5T6T7r7obd Trechus\_obtusus\_Soil.idba.42\_MERGED\_MMG\_ANNOT\_FROM\_BARCODE  
-XX-XX- CA1C3C4T5T6T7tyr Trechus\_tyrrenicus\_NCBI  
-X-XX- CA1C3C4T5T6T7dod Trechus\_doderoi\_NCBI  
-XX-XX- CA1C3C4T5T6T7flla Trechus\_flavocinctus\_NCBI  
-XX-XX- CA1C3C4T5T6T7fel Trechus\_felix\_NCBI  
-XX-XX- CA1C3C4T5T6T7cus Trechus\_custos\_NCBI  
-XX-XX- CA1C3C4T5T6T7umb Trechus\_umbricola\_NCBI  
-XX-XX- CA1C3C4T5T6T7mod Trechus\_modestus\_NCBI  
-XX-XX- CA1C3C4T5T6T7del Trechus\_delarouzei\_NCBI  
-XX-XX- CA1C3C4T5T6T7sstra Trechus\_straneoi\_NCBI  
-XX-XX- CA1C3C4T5T6T7hum Trechus\_humleri\_NCBI  
-XX-XX- CA1C3C4T5T6T7mel Trechus\_melanocephalus\_NCBI  
-XXX-XX- CA1C3C4T5T6T7gua Trechus\_quadristriatus\_NCBI  
-X-XX- CA1C3C4T5T6T7cro Trechus\_croaticus\_NCBI  
-X-X- CA1C3C4T5T6T7tri Trechus\_tristiculus\_NCBI  
-X-X- CA1C3C4T5T6T7ins Trechus\_insubricus\_NCBI  
-X-X- CA1C3C4T5T6T7bari Trechus\_barrii\_NCBI  
-X-X- CA1C3C4T5T6T7mag Trechus\_magistretti\_NCBI  
-XX-XX- CA1C3C4T5T6T7tenu Trechus\_tenulimbatus\_NCBI  
-XX-XX- CA1C3C4T5T6T7str Trechus\_strasseri\_NCBI  
-X-XX- CA1C3C4T5T6T7gla Trechus\_glacialis\_NCBI  
-X-XX- CA1C3C4T5T6T7ham Trechus\_hampeii\_NCBI  
-X-X-XX- CA1C3C4T5T6T7bre Trechus\_brembanus\_NCBI  
-XX-XX- CA1C3C4T5T6T7lon Trechus\_longobardus\_NCBI  
-X-X- CA1C3C4T5T6T7scha Trechus\_schaumii\_NCBI  
-X-X- CA1C3C4T5T6T7int Trechus\_intrusus\_NCBI  
-X-X- CA1C3C4T5T6T7pyg Trechus\_pygmaeus\_NCBI  
-X-XX- CA1C3C4T5T6Ne7hil Neotrechus\_hilfi\_NCBI  
-XX-XX- CA1C3C4T5T6Ne7su Neotrechus\_suturalis\_NCBI  
-X-XX- CA1C3C4T5T6p7mav Spototrechus\_mavetii\_NCBI  
-X-XX- CA1C3C4T5T6Ad7AF2013 Adriaephaenops\_AF2013\_NCBI  
-X-XX- CA1C3C4T5T6Al7bol Allegrettia\_boldorii\_NCBI  
-X-XX- CA1C3C4T5T6It7dim Italaphaenops\_dimaii\_NCBI  
-X-XX- CA1C3C4T5T6Al7pav Allegrettia\_pavani\_NCBI  
-X-XX- CA1C3C4T5T6Le7AF2013 Lessinodytes\_AF2013\_NCBI  
-XX-XX- CA1C3C4T5T6Bo7car Boldoriella\_carminatii\_NCBI  
-XX-XX- CA1C3C4T5T6Bo7foc Boldoriella\_focarilei\_NCBI  
-XX-XX- CA1C3C4T5T6Bo7hum Boldoriella\_humeralis\_NCBI  
-XX-XX- CA1C3C4T5T6Bo7mon Boldoriella\_monguzzi NCBI  
-XX-XX- CA1C3C4T5T60r7vic Orotrechus\_vicentinus\_NCBI  
-X-XX- CA1C3C4T5T60r7gio Orotrechus\_giordani NCBI  
-X-XX- CA1C3C4T5T60r7mon Orotrechus\_montellensis\_NCBI  
-X-XX- CA1C3C4T5T60r7jam Orotrechus\_jamae NCBI  
-X-XX- CA1C3C4T5T60r7mes Orotrechus\_messai NCBI  
-X-XX- CA1C3C4T5T60r7car Orotrechus\_carinthiacus\_NCBI  
-X-XX- CA1C3C4T5T60r7har Orotrechus\_haraldi NCBI  
-X-XX- CA1C3C4T5T60r7mue Orotrechus\_muellerianus\_NCBI  
-XX-XX- CA1C3C4T5T60r7spr Orotrechus\_springeri NCBI  
-XX-XX- CA1C3C4T5T60r7glo Orotrechus\_globulipennis\_NCBI  
-X-XX- CA1C3C4T5T60r7hol Orotrechus\_holdhausi NCBI  
-X-XX- CA1C3C4T5T60r7tor Orotrechus\_torretassoi NCBI  
-XX-XX- CA1C3C4T5T60r7for Orotrechus\_forotulensis\_NCBI  
-X-XX- CA1C3C4T5T6Apo7alb Apoduvalius\_alberichae NCBI  
-X-XX- CA1C3C4T5T6T7aur Trechus\_aurouxi NCBI  
-X-XX- CA1C3C4T5T6T7kah Trechus\_kahleni NCBI  
-XX-XX- CA1C3C4T5T6T7schw Trechus\_schwienbacheri NCBI  
-X-XX- CA1C3C4T5T6T7AF2013\_1 Trechus\_AF2013\_NCBI  
-X-XX- CA1C3C4T5T6T7con Trechus\_controversus\_NCBI  
-X-XX- CA1C3C4T5T6T7car Trechus\_cardioderus NCBI  
-X-XX- CA1C3C4T5T6T7fai Trechus\_fairmairei NCBI  
-X-XX- CA1C3C4T5T6T7AF2013\_3 Trechus\_AF2013\_NCBI  
-XX-XX- CA1C3C4T5T6T7AF2013\_2 Trechus\_AF2013\_NCBI  
-XX-XX- CA1C3C4T5T6T7poc Trechus\_pochoni NCBI  
-X-XX- CA1C3C4T5T6T7esc Trechus\_escalerae NCBI  
-XX-XX- CA1C3C4T5T6T7lep Trechus\_lepontinus NCBI  
-XX-XX- CA1C3C4T5T6T7lig Trechus\_liguricus NCBI  
-XX-XX- CA1C3C4T5T6T7gra Trechus\_gracilitarsis NCBI  
-X-XX- CA1C3C4T5T6T7delh Trechus\_delhermi NCBI  
-XX-XX- CA1C3C4T5T6Je7bir Jeanneilius\_birsteini NCBI  
-XX-XX- CA1C3C4T5T6Je7glo Jeanneilius\_gloriosus NCBI  
-X-XX- CA1C3C4T5T6T7sen Trechus\_sendraii NCBI  
-X-XX- CA1C3C4T5T6T7lal Trechus\_lallemantii NCBI  
-X-XX- CA1C3C4T5T6T7zre Trechus\_zarensis NCBI  
-X-XX- CA1C3C4T5T6T7ibl Trechus\_iblanensis NCBI  
-X-XX- CA1C3C4T5T6T7len Trechus\_lencinai NCBI  
-X-XX- CA1C3C4T5T6T7mar Trechus\_martinezi NCBI  
-X-XX- CA1C3C4T5T6T7ali Trechus\_alicantinus NCBI  
-XXX-XX- CA1C3C4T5T6T7ful Trechus\_fulvus NCBI  
-X-XX- CA1C3C4T5T6T7resp Trechus\_espalyoi NCBI  
-X-XX- CA1C3C4T5T6T7gig Trechus\_gigoni NCBI  
-X-XX- CA1C3C4T5T6T7gro Trechus\_groubei NCBI  
-X-XX- CA1C3C4T5T6T7abe Trechus\_abeillei NCBI  
-X-XX- CA1C3C4T5T6Apo7ans Apoduvalius\_ansiiformis NCBI  
-X-XX- CA1C3C4T5T6T7kar Trechus\_karadenizus NCBI  
-X-XX- CA1C3C4T5T6T7nav Trechus\_navaricus NCBI  
-XX-XX- CA1C3C4T5T6T7bor Trechus\_bordei NCBI  
-X-XX- CA1C3C4T5T6T7arr Trechus\_arribasi NCBI  
-X-XX- CA1C3C4T5T6T7bon Trechus\_bonvouloiri NCBI  
-XX-XX- CA1C3C4T5T6T7dist Trechus\_distinctus NCBI  
-XX-XX- CA1C3C4T5T6T7aub Trechus\_aubryi NCBI  
-X-XX- CA1C3C4T5T6T7sax Trechus\_saxicola NCBI  
-X-XX- CA1C3C4T5T6T7AF2012 Trechus\_AF2012\_NCBI  
-X-XX- CA1C3C4T5T6T7gre Trechus\_grenieri NCBI  
-X-XX- CA1C3C4T5T6Apo7AF106 Apoduvalius\_AF106\_NCBI  
-X-XX- CA1C3C4T5T6T7jea Trechus\_jeannei NCBI  
-XX-XX- CA1C3C4T5T6T7uha Trechus\_uhagoni NCBI  
-XX-XX- CA1C3C4T5T6T7bru Trechus\_bruckii NCBI  
-X-XX- CA1C3C4T5T6T7pie Trechus\_pieltaini NCBI  
-XX-XX- CA1C3C4T5T6T7beu Trechus\_beusti NCBI

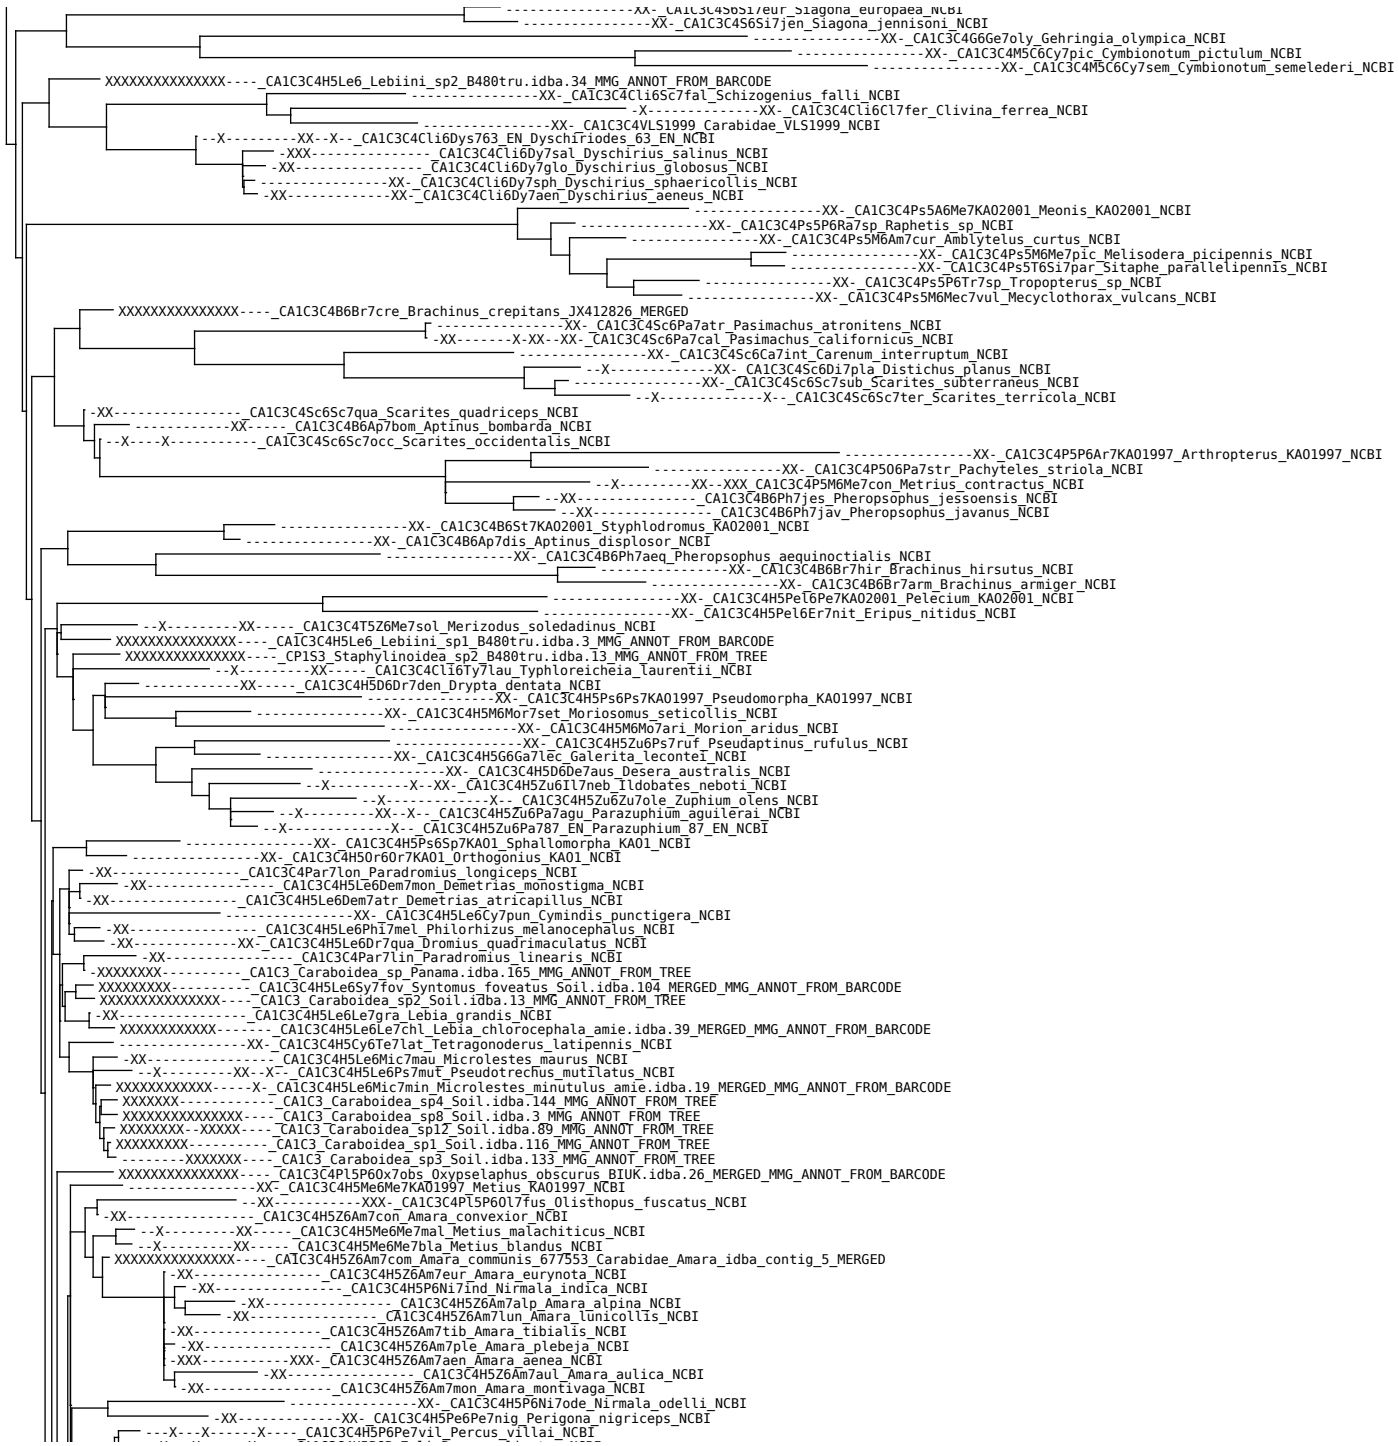

---X--X---X---X---\_CA1C3C4H5P6Pe7pl1\_Percus\_plicatus\_NCBI  
---X---X---XX---CP153540x5P17mit\_Platystethus\_nitens\_NCBI  
---X---X---X---CA1C3C4H5P6Pe7pat\_Percus\_patruelis\_NCBI  
---XX---X---XXXX---CA1C3C4H5P6Pe7pol\_Percus\_politus\_NCBI  
---X---X---X---CA1C3C4H5P6Pe7qui\_Percus\_guiraoi\_NCBI  
---X---X---X---CA1C3C4H5P6Pe7stu\_Percus\_stultus\_NCBI  
---X---X---X---CA1C3C4H5P6Pe7lin\_Percus\_lineatus\_NCBI  
---X---X---CA1C3C4H5P6Pe7cor\_Percus\_corsicus\_NCBI  
---X---X---CA1C3C4H5P6Pe7rei\_Percus\_reichei\_NCBI  
---X---X---CA1C3C4H5P6Pe7cyl\_Percus\_cylindricus\_NCBI  
---X---X---CA1C3C4H5P6Pe7gra\_Percus\_grandicollis\_NCBI  
---X---X---XX---CA1C3C4H5P6Pe7str\_Percus\_strictus\_NCBI  
---X---X---XX---CA1C3C4H5Me6Me7MEM1\_Metius\_MEM1\_NCBI  
---X---X---X---CA1C3C4Ca6Ca17marg\_Galosoma\_marginale\_NCBI  
---X---X---XXX---CA1C3C4H5P6Mo7pic\_Molops\_piceus\_NCBI  
---X---XX---CA1C3C4Za7tro\_Zariquieya\_troglodytes\_NCBI  
---XX---XX---CA1C3C4L15C6Ch7pus\_Chlaenius\_pusillus\_NCBI  
---X---XX---XX---CA1C3C4H5Le6Dem7imp\_Demetrias\_imperialis\_NCBI  
---X---XX---CA1C3C4Za7AF2011\_Zariquieya\_AF2011\_NCBI  
---X---X---CA1C3C4H5P6Mo7edu\_Molops\_edurus\_NCBI  
---XXX---CA1C3\_Caraboidea\_sp1\_ame.idba.145\_MMG\_ANNOT\_FROM\_BARCODE  
---X---X---X---CA1C3C4H5P6Ab7ova\_Abax\_ovalis\_NCBI  
XXXXXXXXXXXXXXXXXX---CA1C3C4H5P6Ab7para\_Abax\_parallelepipedus\_2VGB.idba.3\_MERGED\_MMG\_ANNOT\_FROM\_BARCODE  
XXXXXXXXXX---CA1C3C4H5P6Ab7para\_Abax\_parallelepipedus\_ame.idba.169\_MERGED\_MMG\_ANNOT\_FROM\_BARCODE  
---X---X---X---CA1C3C4H5P6Aa7eab\_Abax\_carinatus\_NCBI  
---XX---CA1C3C4H5P6Sa7obe\_Sarticus\_obesulus\_NCBI  
---XX---CA1C3C4H5P6No7tri\_Notonomus\_triplogenioides\_NCBI  
---XX---CA1C3C4H5P6Lei7pue\_Leiradira\_puella\_NCBI  
---XX---CA1C3C4H5P6Sa7esm\_Sarticus\_esmeraldipennis\_NCBI  
---XX---CA1C3C4H5P6No7WA1\_Notonomus\_WA1\_NCBI  
---XX---CA1C3C4H5P6Sa7SA1\_Sarticus\_SA1\_NCBI  
---XX---CA1C3C4H5P6Sa7WA1\_Sarticus\_WA1\_NCBI  
---XX---CA1C3C4H5P6No7sph\_Notonomus\_sphroides\_NCBI  
---XX---CA1C3C4H5P6Sa7cya\_Sarticus\_cyaneocinctus\_NCBI  
---XX---CA1C3C4H5P6Lei7alt\_Leiradira\_alternans\_NCBI  
---XX---CA1C3C4H5P6No7ang\_Notonomus\_angustibasis\_NCBI  
---XX---CA1C3C4H5P6Lei7ten\_Leiradira\_tenuis\_NCBI  
---XX---CA1C3C4H5P6L7pro\_Platycaelus\_prolixus\_NCBI  
---XX---CA1C3C4H5P6Sa7OLD1\_Sarticus\_OLD1\_NCBI  
---XX---CA1C3C4H5P6Sa7cor\_Sarticus\_coradgeri\_NCBI  
---XX---CA1C3C4H5P6Lei7auri\_Leiradira\_aurifer\_NCBI  
---XX---CA1C3C4H5P6Au7cal\_Aulacopodus\_calathoides\_NCBI  
---XX---CA1C3C4H5P6Lei7aur\_Leiradira\_auricollis\_NCBI  
---XX---CA1C3C4H5P6No7dim\_Notonomus\_dimorphicus\_NCBI  
---XX---CA1C3C4H5P6Pe7iri\_Pseudocenus\_iridescens\_NCBI  
---XX---CA1C3C4H5P6No7min\_Notonomus\_minimus\_NCBI  
---XX---CA1C3C4H5P6No7aus\_Notonomus\_australis\_NCBI  
---XX---CA1C3C4H5P6Lox7caF\_Loxodactylus\_carinulatus\_NCBI  
---XX---CA1C3C4H5P6No7med\_Notonomus\_mediosulcatus\_NCBI  
---XX---CA1C3C4H5P6Ac7fer\_Acanthoferonia\_ferox\_NCBI  
---XX---CA1C3C4H5P6No7sat\_Notonomus\_satrapa\_NCBI  
---XX---CA1C3C4H5P6No7opa\_Notonomus\_opacicolis\_NCBI  
---XX---CA1C3C4H5P6No7vio\_Notonomus\_violaceus\_NCBI  
---XX---CA1C3C4H5P6No7flo\_Notonomus\_flos\_NCBI  
---XX---CA1C3C4H5P6Sa7bia\_Sarticus\_blackburni\_NCBI  
---XX---CA1C3C4H5P6No7KW2014\_Notonomus\_KW2014\_NCBI  
---XX---CA1C3C4H5P6Pa7sub\_Paniestichus\_subsolianus\_NCBI  
---XX---CA1C3C4H5P6No7KW2014\_1\_Notonomus\_KW2014\_NCBI  
---XX---CA1C3C4H5P6Par7Nah\_Parhyptes\_Nahuelbuta\_NCBI  
---XX---CA1C3C4H5P6Par7bon\_Parhyptes\_bonellii\_NCBI  
---XX---CA1C3C4H5P6No7lat\_Notonomus\_lateralis\_NCBI  
---XX---CA1C3C4L15C6Ch7ruf\_Chlaenius\_ruficauda\_NCBI  
---XX---CA1C3C4L15C6Ch7ves\_Chlaenius\_vestitus\_NCBI  
---XX---CA1C3C4H5P6Par7ste\_Parhyptes\_stenomus\_NCBI  
---XX---CA1C3C4H5P6Par7mun\_Parhyptes\_nunni\_NCBI  
---XX---CA1C3C4H5Z6Am7sin\_Amara\_sinuosa\_NCBI  
---XX---CA1C3C4H5P6Pt7balu\_Pterostichus\_balu\_NCBI  
---XX---CA1C3C4H5P6Pt7hoe\_Pterostichus\_hoelli\_NCBI  
---XXX---XX---CA1C3C4H5P6Pt7str\_Pterostichus\_strenuus\_NCBI  
---XX---CA1C3C4H5Z6Za7ten\_Zabrus\_tenebrioides\_NCBI  
---XX---XXX---CA1C3C4H5Z6Za7ign\_Zabrus\_ignavus\_NCBI  
XXXXXXXXXXXXXXXXX---CA1C3\_Caraboidea\_sp11\_Soil.idba.81\_MMG\_ANNOT\_FROM\_TREE  
---XX---X---CA1C3C4H5P607veL\_Orthomus\_velocissimus\_NCBI  
XXXXXXXXXXXXXXXXX---CA1C3\_Caraboidea\_sp10\_Soil.idba.78\_MMG\_ANNOT\_FROM\_TREE  
---XXX---CA1C3C4H5P6Pt7ros\_Pterostichus\_rostratus\_NCBI  
---XX---CA1C3C4Pe7lon\_Pedius\_longicollis\_NCBI  
---XX---X---CA1C3C4H5Z6Am7fap\_Amara\_apicaria\_NCBI  
---XX---CA1C3C4H5Z6Am7sim\_Amara\_similata\_NCBI  
---XX---CA1C3C4H5Z6Am7ova\_Amara\_ovata\_NCBI  
---XX---CA1C3C4H5P6Pt7mult\_Pterostichus\_multisetus\_NCBI  
---XXXX---CA1C3\_Caraboidea\_sp1\_BIUK.idba.72\_MMG\_ANNOT\_FROM\_TREE  
---XX---XX---CA1C3C4H5P6T7mor\_Trigonotoma\_morvani\_NCBI  
---XX---XX---CA1C3C4H5P6Le7hol\_Lesticus\_holzschuhi\_NCBI  
---XXX---CA1C3C4H5P6Pt7mut\_Pterostichus\_mutus\_NCBI  
---XX---XX---CA1C3C4H5P6Pt7aen\_Pterostichus\_aeneocupreus\_NCBI  
---XX---XX---CA1C3C4H5P6Pt7sub\_Piesmus\_submarginatus\_NCBI  
XXXXXXXXXXXXXXXXXX---CA1C3C4H5P657pum\_Stomis\_punicatus\_2VGB.idba.4\_MERGED\_MMG\_ANNOT\_FROM\_BARCODE  
XXXXXXXXXXXXXXXXXX---CA1C3C4H5P6St7pomis\_Stomis\_punicatus\_ame.idba.14\_MMG\_ANNOT\_FROM\_BARCODE  
---X---XX---CA1C3C4H5P6L02012\_Harpalinae\_L02012\_NCBI  
---XX---XX---CA1C3C4H5P6Pt7dil\_Pterostichus\_diligens\_NCBI  
---XX---XX---CA1C3C4H5P6Pt7deuv\_Pterostichus\_deuvesianus\_NCBI  
---XX---CA1C3C4H5P6Po7cha\_Poecilus\_chalcites\_NCBI  
---XXX---X---CA1C3C4H5P6Po7luc\_Poecilus\_lucublandus\_NCBI  
---XX---XX---CA1C3C4H5P6Pt7pse\_Pterostichus\_pseudosinensis\_NCBI  
---XX---XX---CA1C3C4H5P6Pt7perh\_Pterostichus\_perhoplites\_NCBI  
---XX---XX---CA1C3C4H5P6Po7qua\_Poecilus\_quadricollis\_NCBI  
---XXX---X---CA1C3C4H5P6Pt7mel\_Pterostichus\_melanarius\_NCBI  
---XX---XX---CA1C3C4H5P6Pt7sty\_Pterostichus\_stygicus\_NCBI  
---XX---XX---CA1C3C4H5P6Pt7sem\_Pterostichus\_senowulsi\_NCBI  
---XX---XX---CA1C3C4H5P6Pt7L02012\_2\_Pterostichus\_L02012\_NCBI

-XX-----CA1C3C4H5P6Pt7ver\_Pterostichus\_venalis\_NCBI  
-XX-----CA1C3C4H5P6Pt7L02012\_1\_Pterostichus\_L02012\_NCBI  
-XX-----CA1C3C4H5P6Pt7min\_Pterostichus\_minor\_NCBI  
-XXX-----CA1C3C4H5P6Pt7luc\_Pterostichus\_luctuosus\_NCBI  
-XX-----CA1C3C4H5P6Pt7nigr\_Pterostichus\_nigrita\_NCBI  
-XX-----CA1C3C4H5P6Pt7rha\_Pterostichus\_rhaeticus\_NCBI  
-XX-----CA1C3C4H5P6Pt7sex\_Cyclotrachelus\_seximpressus\_NCBI  
-XX-----CA1C3C4H5P6Pt7p1l\_Pterostichus\_pilifer\_NCBI  
-XX-----CA1C3C4H5P6Pt7com\_Pterostichus\_cometes\_NCBI  
-XX-----CA1C3C4H5P6Pt7ango\_Pterostichus\_angoarnigi\_NCBI  
-XX-----CA1C3C4H5P6Pt7gon\_Eutrichopus\_gonzalezi\_NCBI  
-XX-----CA1C3C4H5P6Pt7pseudo\_Pterostichus\_pseudoharmandi\_NCBI  
-XX-----CA1C3C4H5P6Pt7jan\_Pterostichus\_janbritoi\_NCBI  
-XX-----CA1C3C4H5P6Pt7L02012\_5\_Pterostichus\_L02012\_NCBI  
-XX-----CA1C3C4H5P6Pt7L02012\_Pterostichus\_L02012\_NCBI  
-XX-----CA1C3C4H5P6Pt7bal\_Pterostichus\_balachowskyi\_NCBI  
-XX-----CA1C3C4H5P6Pt7ganj\_Pterostichus\_ganja\_NCBI  
-XX-----CA1C3C4H5P6Pt7fri\_Pterostichus\_fritzheikei\_NCBI  
-XX-----CA1C3C4H5P6Pt7ger\_Pterostichus\_gerdi\_NCBI  
-XX-----CA1C3C4H5P6Pt7L02012\_6\_Pterostichus\_L02012\_NCBI  
-XX-----CA1C3C4H5P6Pt7mats\_Pterostichus\_matsumurai\_NCBI  
-XX-----CA1C3C4H5P6Pt7cona\_Pterostichus\_conaensis\_NCBI  
-XX-----CA1C3C4H5P6Pt7gan\_Pterostichus\_ganesh\_NCBI  
-XX-----CA1C3C4H5P6Pt7nep\_Pterostichus\_nepalensis\_NCBI  
-XX-----CA1C3C4H5P6Pt7mm\_Pterostichus\_immarginatus\_NCBI  
-XX-----CA1C3C4H5P6Pt7chus\_Pterostichus\_chainapani\_NCBI  
-XX-----CA1C3C4H5P6Pt7jug\_Pterostichus\_juga\_NCBI  
-XX-----CA1C3C4H5P6Pt7ola\_Pterostichus\_olafi\_NCBI  
-XX-----CA1C3C4H5P6Pt7tul\_Pterostichus\_tulobalu\_NCBI  
-XX-----CA1C3C4H5P6Pt7gom\_Pterostichus\_gompanus\_NCBI  
-XX-----CA1C3C4H5P6Pt7let\_Pterostichus\_letensis\_NCBI  
-XX-----CA1C3C4H5P6Pt7har\_Pterostichus\_hartmanni\_NCBI  
-XX-----CA1C3C4H5P6Pt7dho\_Pterostichus\_dhorpatanicus\_NCBI  
-XX-----CA1C3C4H5P6Pt7L02012\_4\_Pterostichus\_L02012\_NCBI  
-XX-----CA1C3C4H5P6Pt7gaq\_Pterostichus\_gaggates\_NCBI  
-XX-----CA1C3C4H5P6Pt7kle\_Pterostichus\_klentfeldi\_NCBI  
-XX-----CA1C3C4H5P6Pt7deu\_Pterostichus\_deuvei\_NCBI  
-XX-----CA1C3C4H5P6Pt7nige\_Pterostichus\_niger\_NCBI  
-XX-----CA1C3C4H5P6Pt7trin\_Pterostichus\_trinitensis\_NCBI  
-XX-----CA1C3C4H5P6Pt7feny\_Pterostichus\_fenyesi\_NCBI  
-XX-----CA1C3C4H5P6Pt7pem\_Pterostichus\_pemphredo\_NCBI  
XXXXXXXXXXXX-CA1C3C4H5P6Pt7nig\_Pterostichus\_niger\_2VGB.idba.5\_MERGED\_MMG\_ANNOT\_FROM\_BARCODE  
XXXXXXXXXXXX-CA1C3C4H5P6Pt7nig\_Pterostichus\_niger\_BIUK.idba.18\_MMG\_ANNOT\_FROM\_BARCODE  
-X-X-----CA1C3C4S6Pt7ate\_Scarites\_aterimus\_NCBI  
-XX-----CA1C3C4H5P6Pt7mor\_Pterostichus\_morionides\_NCBI  
-X-----CA1C3C4H5P6Pt7ado\_Pterostichus\_adoxus\_NCBI  
-XXX-----CA1C3C4H5P6Pt7tri\_Pterostichus\_trinitensis\_NCBI  
-XXX-----CA1C3C4H5P6Pt7her\_Pterostichus\_herculeanus\_NCBI  
-XX-----CA1C3C4H5P6Pt7eca\_Pterostichus\_eccarinatus\_NCBI  
-XX-----CA1C3C4H5P6Pt7lam\_Pterostichus\_lama\_NCBI  
-XX-----CA1C3C4H5P6Pt7ser\_Pterostichus\_serripes\_NCBI  
-XX-----CA1C3C4H5P6Pt7men\_Pterostichus\_menestriesii\_NCBI  
-XX-----CA1C3C4H5P6Pt7alg\_Pterostichus\_algidus\_NCBI  
-XX-----CA1C3C4H5P6Pt7fas\_Pterostichus\_fasciatopunctatus\_NCBI  
-XX-----CA1C3C4H5P6Pt7glo\_Pterostichus\_globosus\_NCBI  
-XXX-----CA1C3C4H5P6Pt7DDM2010\_Pterostichus\_DDM2010\_NCBI  
-XXX-----CA1C3\_Caraboidea\_sp2\_BIUK.idba.96\_MMG\_ANNOT\_FROM\_TREE  
XXXXXXXXXXXX-CA1C3C4H5P6Pt7mad\_Pterostichus\_madidus\_2VGB.idba.2\_MMG\_ANNOT\_FROM\_BARCODE  
XXXXXXXXXXXX-CA1C3C4H5P6Pt7mad\_Pterostichus\_madidus\_BIUK.idba.54\_MERGED\_MMG\_ANNOT\_FROM\_BARCODE  
-X-----CA1C3C4H5P6Pt7ple\_Pterostichus\_plesiomorphus\_NCBI  
-X-----CA1C3C4H5P6Pt7shi\_Pterostichus\_shibanus\_NCBI  
-X-----CA1C3C4H5P6Pt7scu\_Pterostichus\_scurra\_NCBI  
-X-----CA1C3C4H5P6Pt7rap\_Pterostichus\_raptor\_NCBI  
-X-----CA1C3C4H5P6Pt7pseud\_Pterostichus\_pseudopachinus\_NCBI  
-XX-----CA1C3C4H5P6Pt7cav\_Pterostichus\_cavazzinii\_NCBI  
-X-----CA1C3C4H5P6Pt7spho\_Pterostichus\_sphodriiformis\_NCBI  
-X-----CA1C3C4H5P6Pt7mas\_Pterostichus\_masidaii\_NCBI  
-X-----CA1C3C4H5P6Pt7kyu\_Pterostichus\_kyushuensis\_NCBI  
-X-----CA1C3C4H5P6Pt7macro\_Pterostichus\_macrocephalus\_NCBI  
-X-----CA1C3C4H5P6Pt7yak\_Pterostichus\_yakushimanus\_NCBI  
-X-----CA1C3C4H5P6Pt7muc\_Pterostichus\_mucronatus\_NCBI  
-X-----CA1C3C4H5P6Pt7abac\_Pterostichus\_abaciformis\_NCBI  
-X-----CA1C3C4H5P6Pt7sin\_Pterostichus\_sincerus\_NCBI  
-X-----CA1C3C4H5P6Pt7prae\_Pterostichus\_praedo\_NCBI  
-X-----CA1C3C4H5P6Pt7macr\_Pterostichus\_macrogenys\_NCBI  
-X-----CA1C3C4H5P6Pt7koh\_Pterostichus\_koheii\_NCBI  
-X-----CA1C3C4H5P6Pt7seu\_Pterostichus\_seunglaki\_NCBI  
-X-----CA1C3C4H5P6Pt7micr\_Pterostichus\_microps\_NCBI  
-X-----CA1C3C4H5P6Pt7bel\_Pterostichus\_bellatrix\_NCBI  
-X-----CA1C3C4H5P6Pt7opa\_Pterostichus\_opacipennis\_NCBI  
-X-----CA1C3C4H5P6Pt7mir\_Pterostichus\_mirificus\_NCBI  
-X-----CA1C3C4H5P6Pt7spic\_Pterostichus\_spiculifer\_NCBI  
-X-----CA1C3C4H5P6Pt7dan\_Pterostichus\_dandonis\_NCBI  
-X-----CA1C3C4H5P6Pt7cris\_Pterostichus\_cristatoides\_NCBI  
-X-----CA1C3C4H5P6Pt7kat\_Pterostichus\_katashinensis\_NCBI  
-X-----CA1C3C4H5P6Pt7asy\_Pterostichus\_asymmetricus\_NCBI  
-X-----CA1C3C4H5P6Pt7bie\_Pterostichus\_biexcisus\_NCBI  
-X-----CA1C3C4H5P6Pt7fuj1\_Pterostichus\_fujimuraii\_NCBI  
-X-----CA1C3C4H5P6Pt7shib\_Pterostichus\_shibatai\_NCBI  
-X-----CA1C3C4H5P6Pt7tao\_Pterostichus\_taoi\_NCBI  
-X-----CA1C3C4H5P6Pt7bis\_Pterostichus\_bisetosus\_NCBI  
-X-----CA1C3C4H5P6Pt7uen\_Pterostichus\_uenoi\_NCBI  
-X-----CA1C3C4H5P6Pt7dai\_Pterostichus\_daisenicus\_NCBI  
-XX-----CA1C3C4H5H6Pt7ind\_Harpalus\_indigenus\_NCBI  
-XXXX-----CA1C3\_Caraboidea\_sp2\_amei.idba.182\_MMG\_ANNOT\_FROM\_TREE  
-XX-----CA1C3C4H5H6Pt7ver\_Bradycellus\_verbasci\_NCBI  
XXXXXXXXXXXX-CA1C3C4H5H6Pt7ruf\_Bradycellus\_ruficollis\_amei.idba.124\_MERGED\_MMG\_ANNOT\_FROM\_BARCODE  
-XX-----CA1C3C4H5H6Pt7p1a\_Dicheirotrichus\_placidus\_NCBI  
-XX-----CA1C3C4H5H6Pt7obs\_Dicheirotrichus\_obsoletus\_NCBI  
-X-----CA1C3C4H5H6Pt7sha\_Bradycellus\_sharpi\_NCBI



-XX-----XX-CA1C3C4H5H6Br7har\_Bradycellus\_harpalinus NCBI  
-XX-----XX-CA1C3C4H5H6Acu7par\_Acupalpus\_parvulus NCBI  
-XX-----XX-CA1C3C4H5H6Ant7con\_Anthracus\_consputus NCBI  
-XX-----CA1C3C4H5H6Acu7ele\_Acupalpus\_elegans NCBI  
-XX-----XX-CA1C3C4H5H6St7lec\_Stenolophus\_lecontei NCBI  
-XXX-----XX-CA1C3C4H5H6St7teu\_Stenolophus\_teunonus NCBI  
-XX-----CA1C3C4H5H6St7mix\_Stenolophus\_mixtus NCBI  
-XX-----XX-CA1C3C4H5H6Acu7exi\_Acupalpus\_exiguus NCBI  
-XX-----XX-CA1C3C4H5H6Acu7dub\_Acupalpus\_dubius NCBI  
-XX-----XX-CA1C3C4H5H6Acu7mer\_Acupalpus\_meridianus NCBI  
-XX-----XX-CA1C3C4H5H6An7bin\_Anisodactylus\_binotatus NCBI  
-XX-----CA1C3C4H5H6An7vir\_Anisodactylus\_virens NCBI  
XXXXXX-X-CA1C3C4H5H6An7poe\_Anisodactylus\_poeciloides amie.idba.172\_MERGED\_MMG\_ANNOT\_FROM\_BARCODE  
-XX-----CA1C3C4H5H6An7san\_Anisodactylus\_sanctaerucis NCBI  
-XX-----XX-CA1C3C4H5H6Pe7KA02001\_Pelmatellus\_KA02001 NCBI  
-X-----XX-CA1C3C4H5H6Sc7obl\_Scybalicus\_oblongisculus NCBI  
-XX-----XX-CA1C3C4H5H6Di7cor\_Discoderus\_cordicollis NCBI  
-XX-----CA1C3C4H5H6Ha7att\_Harpalus\_attenuatus NCBI  
-XX-----XX-CA1C3C4H5H6Ha7her\_Harpalus\_herbivagus NCBI  
-XX-----CA1C3C4H5H6Ha7rub\_Harpalus\_rubripes NCBI  
-XX-----XX-CA1C3C4H5H6Ha7ruf\_Harpalus\_rufipalpis NCBI  
-XX-----XX-CA1C3C4H5H6Ha7hon\_Harpalus\_honestus NCBI  
-XX-----XX-CA1C3C4H5H6Op7lat\_Ophonus\_laticollis NCBI  
-XX-----XX-CA1C3C4H5H6Dix7sph\_Dixus\_sphaerocephalus NCBI  
XXXXXXXXXXXXXXXX-CA1C3\_Caraboidea\_sp9\_Soil.idba.30\_MMG\_ANNOT\_FROM\_TREE  
-X-----X-CA1C3C4H5H6Dix7cap\_Dixus\_capitatus NCBI  
-XX-----XX-CA1C3C4H5H6Gra7Gartus\_Gartus NCBI  
XXX-----CA1C3C4H5H6Cry7ten\_Cryptophonus\_tenebrosus amie.idba.193\_MERGED\_MMG\_ANNOT\_FROM\_BARCODE  
-XX-----XX-CA1C3C4H5H6Op7sch\_Ophonus\_schaubergerianus NCBI  
-XX-----XX-CA1C3C4H5H6Op7cri\_Ophonus\_cribricollis NCBI  
-XX-----CA1C3C4H5H6Ha7lat\_Harpalus\_latus NCBI  
-XX-----CA1C3C4H5H6Ha7gri\_Harpalus\_griseus NCBI  
-XX-----CA1C3C4H5H6Ha7calc\_Harpalus\_calceatus NCBI  
-XX-----XX-CA1C3C4H5H6Ha7dim\_Harpalus\_dimidiatus NCBI  
XXXXXXXXXXXX-CA1C3C4H5H6Op7ard\_Ophonus\_ardosiacus Soil.idba.8\_MMG\_ANNOT\_FROM\_TREE  
-XX-----XX-CA1C3C4H5H6Ha7pen\_Harpalus\_pensylvanicus NCBI  
-XXX-----X-CA1C3C4H5H6Ha7rufi\_Harpalus\_rufipes NCBI  
-XX-----CA1C3C4H5H6Ha7dist\_Harpalus\_distans NCBI  
-XX-----CA1C3C4H5H6Op7azu\_Ophonus\_azureus NCBI  
-XX-----CA1C3C4H5H6Ha7anx\_Harpalus\_anxius NCBI  
-XX-----XX-CA1C3C4H5H6Ha7ser\_Harpalus\_serripes NCBI  
-XXX-----XXX-CA1C3C4H5H6Ha7aff\_Harpalus\_affinis NCBI  
-XX-----XX-CA1C3C4H5H6Pa7pec\_Paraeutrichopus\_pecoudi NCBI  
-XX-----XX-CA1C3C4P15S6P17inc\_Platyderus\_incertans NCBI  
-XX-----XXX-CA1C3C4P15S6P17var\_Platyderus\_varians NCBI  
-XX-----X-CA1C3C4H5P6An7CR2009\_Ancholeus\_CR2009 NCBI  
-XX-----XX-CA1C3C4H5P6Po7cup\_Poecilus\_cupreus NCBI  
-XX-----XX-CA1C3C4H5P6Po7sci\_Poecilus\_scitulus NCBI  
-XX-----XX-CA1C3C4H5P6Po7ver\_Poecilus\_versicolor NCBI  
-XX-----X-CA1C3C4H5P6Po7pur\_Poecilus\_purpurascens NCBI  
X-XXXXXXXXXXXX-CA1C3C4H5Hex6He7ter\_Hexagonia\_terminalis JX412768  
XXXXXXXXXXXX-X-CA1C3C4H5Pa6Cr7nob\_Craspedophorus\_nobilis JX412738  
-XX-----X-CA1C3C4P15S6Am7gau\_Amaroschema\_gaudini NCBI  
-XX-----XX-CA1C3C4Li5C6Ch7pal\_Chlaenius\_pallipes NCBI  
-XX-----XX-CA1C3C4Li5C6Ch7cos\_Chlaenius\_costiger NCBI  
-XX-----XX-CA1C3C4Li5C6Ch7ben\_Chlaenius\_bengalensis NCBI  
-XX-----CA1C3C4P15P6Ag7pun\_Agonum\_punctiforme NCBI  
-XX-----CA1C3C4P15P6Ag7oct\_Agonum\_octopunctatum NCBI  
-XX-----CA1C3C4P15P6Ag7pal\_Agonum\_palustre NCBI  
-XXXXXXXXXXXX-XXX-CA1C3C4P15P6Ag7mue\_Agonum\_muelleri JX412835\_MERGED  
-XX-----XX-CA1C3C4P15P6Ag7mar\_Agonum\_marginatum NCBI  
-XXX-----XXX-CA1C3C4P15P6An7dor\_Anchomenus\_dorsalis NCBI  
-XX-----XX-CA1C3C4P15P6Ag7ext\_Agonum\_extensicolle NCBI  
-XX-----XX-CA1C3C4P15P6No7BMNH668190\_Notagonum\_BMNH668190 NCBI  
-XX-----XX-CA1C3C4H5P6Co7BMNH668196\_Colpodes\_BMNH668196 NCBI  
-XX-----XX-CA1C3C4H5P6Co7BMNH668191\_Colpodes\_BMNH668191 NCBI  
-XX-----XX-CA1C3C4H5L6Lo7KA01997\_Loxandrus\_KA01997 NCBI  
-X-----X-CA1C3C4P15P6B17sph\_Blackburnia\_sphodriiformis NCBI  
-X-----X-CA1C3C4P15P6B17mut\_Blackburnia\_mutabilis NCBI  
-X-----X-CA1C3C4P15P6B17hil\_Blackburnia\_hilaris NCBI  
-X-----X-CA1C3C4P15P6B17frac\_Blackburnia\_fractistriata NCBI  
-X-----X-CA1C3C4P15P6B17mus\_Blackburnia\_muscicola NCBI  
-X-----X-CA1C3C4P15P6B17lim\_Blackburnia\_limbatata NCBI  
-X-----X-CA1C3C4P15P6B17pos\_Blackburnia\_posticata NCBI  
-X-----X-CA1C3C4P15P6B17luc\_Blackburnia\_lucipetens NCBI  
-X-----X-CA1C3C4P15P6B17rup\_Blackburnia\_rupicola NCBI  
-X-----X-CA1C3C4P15P6B17mol\_Blackburnia\_molokaiensis NCBI  
-X-----X-CA1C3C4P15P6B17pav\_Blackburnia\_pavida NCBI  
-X-----X-CA1C3C4P15P6B17asq\_Blackburnia\_asquithi NCBI  
-X-----X-CA1C3C4P15P6B17alt\_Blackburnia\_alternans NCBI  
-X-----X-CA1C3C4P15P6No7sub\_Notagonum\_submetallicum NCBI  
-X-----X-CA1C3C4P15P6B17lan\_Blackburnia\_lanaiensis NCBI  
-X-----X-CA1C3C4P15P6B17haw\_Blackburnia\_hawaiiensis NCBI  
-X-----X-CA1C3C4P15P6B17for\_Blackburnia\_fordi NCBI  
-X-----X-CA1C3C4P15P6B17fos\_Blackburnia\_fossipennis NCBI  
-X-----X-CA1C3C4P15P6B17kuk\_Blackburnia\_kukui NCBI  
-X-----X-CA1C3C4P15P6B17cos\_Blackburnia\_costata NCBI  
-X-----XX-X-CA1C3C4Li5L6Li7pun\_Licinus\_punctatulus NCBI  
-XX-----X-CA1C3C4H5Z6Am7Ing\_Amara\_ingenua NCBI  
-X-----XX-CA1C3C4P15P6B17rot\_Blackburnia\_polhemusi NCBI  
-XX-----XX-CA1C3C4P15P6O17rot\_Olisthopus\_rotundatus NCBI  
-X-----X-CA1C3C4P15P6B17pun\_Blackburnia\_puncticeps NCBI  
-XXX-----XXX-CA1C3C4P15P6Pa7alb\_Parachus\_albipes NCBI  
-X-----X-CA1C3C4P15P6B17puk\_Blackburnia\_pukalaina NCBI  
-X-----X-CA1C3C4P15P6B17fra\_Blackburnia\_fracta NCBI  
-X-----X-CA1C3C4P15P6B17lon\_Blackburnia\_longipes NCBI  
-X-----X-CA1C3C4P15P6B17opt\_Blackburnia\_optata NCBI  
-X-----X-CA1C3C4P15P6B17fri\_Blackburnia\_frigida NCBI  
-X-----X-CA1C3C4P15P6B17kam\_Blackburnia\_kamehameha NCBI  
-X-----X-CA1C3C4P15P6B17hih\_Blackburnia\_hihia NCBI

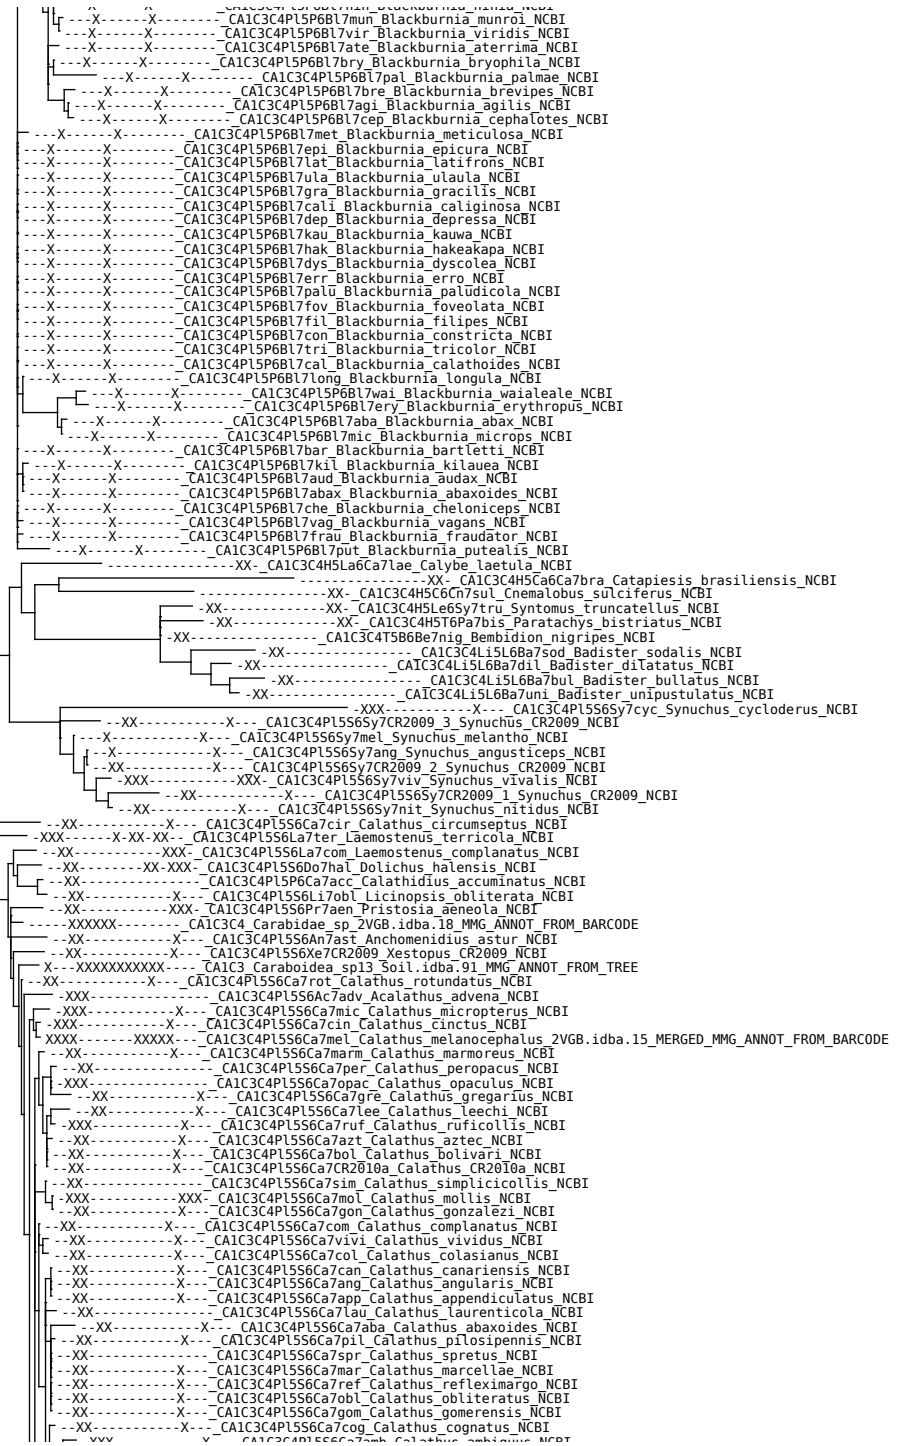

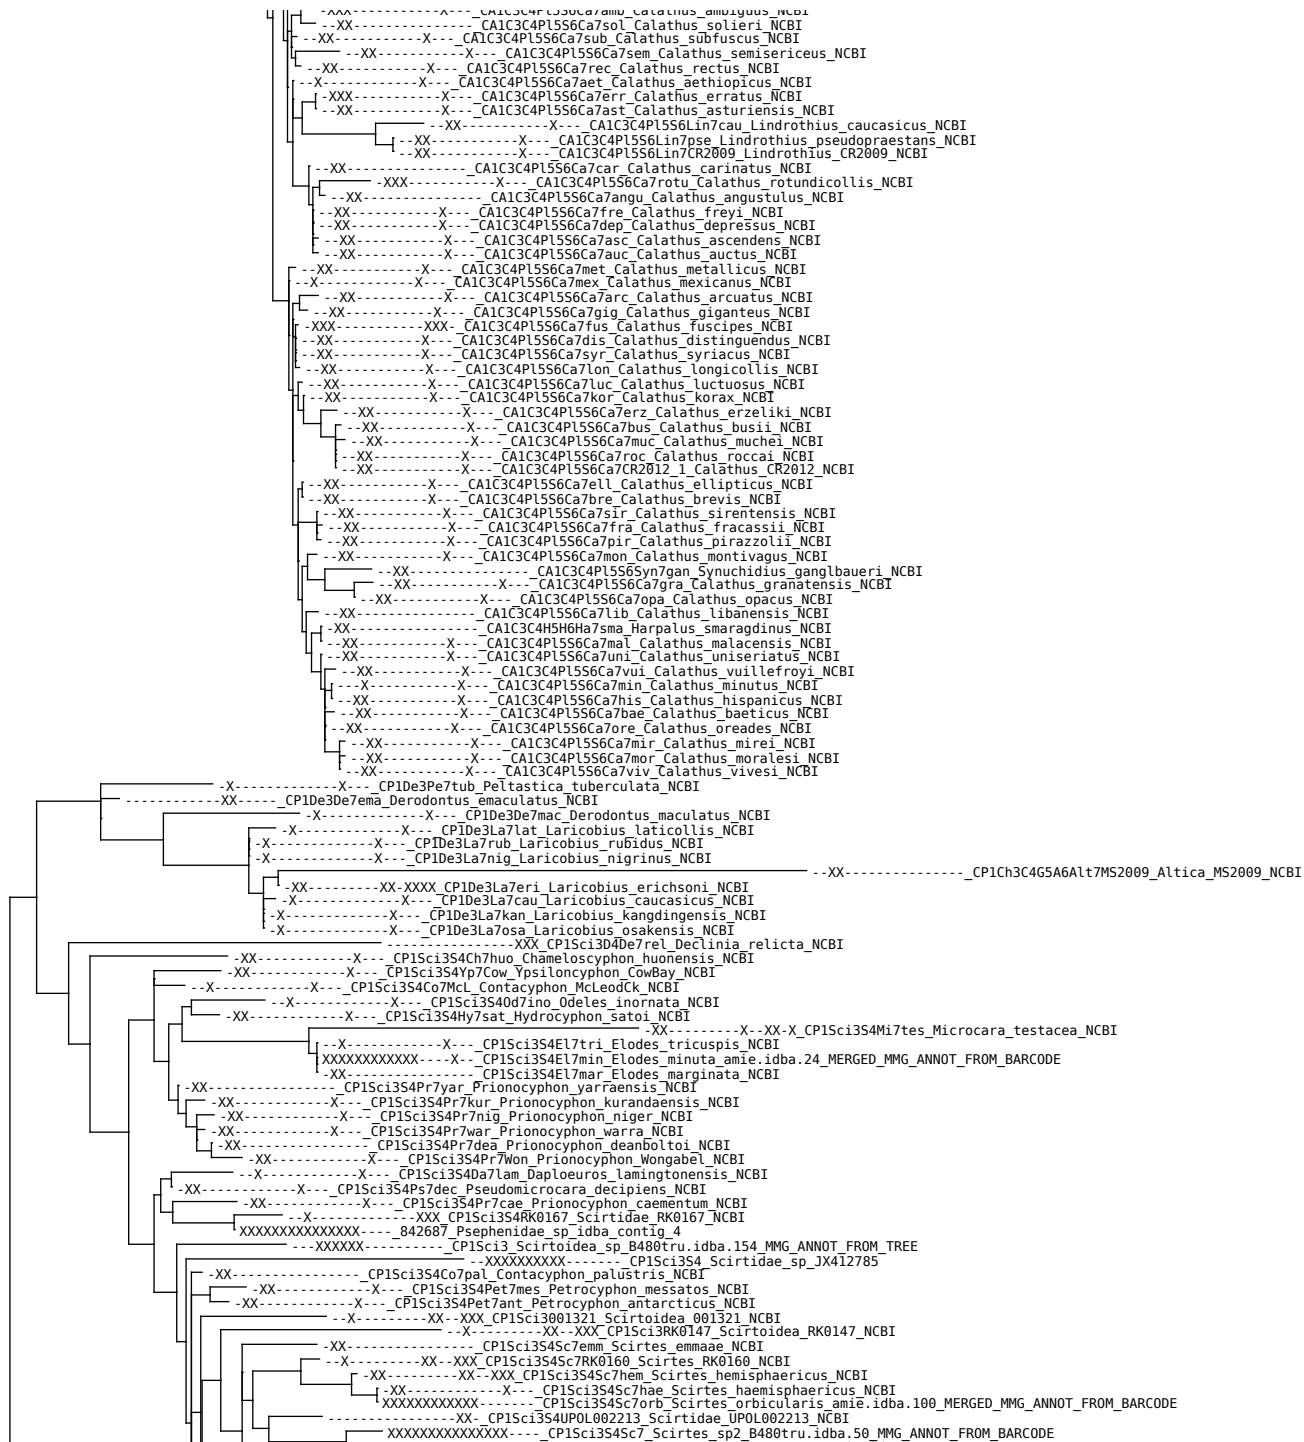

Phylogenetic tree showing relationships between various species, primarily in the order Scirtida. The tree is rooted on the left and branches out to the right. Species names are listed on the right side of the tree, often followed by their NCBI accession number. The tree is annotated with 'X' and 'XX' at various nodes, indicating specific characteristics or clades. The species names include:

- CP1Sci354RK0162 Scirtidae RK0162 NCBI
- CP1Sci354RK0165 Scirtidae RK0165 NCBI
- CP1Sci354RK0159 Scirtidae RK0159 NCBI
- CP1Sci354Sc7pin Scirtes pinjarraensis NCBI
- CP1Sci35407f10 Ora floccosa NCBI
- CP1Sci354Sc7ex0 Scirtes exoletus NCBI
- CP1Sci354Sc7mic Scirtes microrotundus NCBI
- CP1Sci354Sc7int Scirtes interstinctus NCBI
- CP1Sci354Sc7bri Scirtes brisbanensis NCBI
- CP1Sci354Ex7ruf Exochomoscirtes ruforotundus NCBI
- CP1Sci354Ps7cin Pseudomicrocara cincta NCBI
- CP1Sci354Ps7New Pseudomicrocara Newenhami NCBI
- CP1Sci354Ps7han Pseudomicrocara hangayi NCBI
- CP1Sci354Ps7par Pseudomicrocara parva NCBI
- CP1Sci354Ps7CW227 Pseudomicrocara CW227 NCBI
- CP1Sci354Ps7vari Pseudomicrocara variegata NCBI
- CP1Sci354Ps7CW231 Pseudomicrocara CW231 NCBI
- CP1Sci354Ma7cra Macrohelodes crassus NCBI
- CP1Sci354Pr7dis Prionocyphon discoideus NCBI
- CP1Sci354Pr7sex Prionocyphon sexmaculatus NCBI
- CP1Sci354Ps7dav Pseudomicrocara davidsoni NCBI
- CP1Sci354Ps7des Pseudomicrocara desraeae NCBI
- CP1Sci354Ps7ori Pseudomicrocara orientalis NCBI
- CP1Sci354Ps7str Pseudomicrocara Strathblane NCBI
- CP1Sci354Ps7spi Pseudomicrocara spilita NCBI
- CP1Sci354Ps7ant Pseudomicrocara anthophilia NCBI
- CP1Sci354Pr7ser Prionocyphon serricornis NCBI
- CP1Sci354 Scirtidae sp. JX412728
- CP1Sci354Het7aus Heterocyphon australis NCBI
- CP1Sci354Ma7thu Macrohelodes thunguttiensis NCBI
- CP1Sci354Ma7spi Macrohelodes spinapennis NCBI
- CP1Sci354Ma7luc Macrohelodes lucidis NCBI
- CP1Sci354Pe7CW400 Peneveronatus CW400 NCBI
- CP1Sci354Pe7mac Peneveronatus macedonensis NCBI
- CP1Sci354Ps7ang Pseudomicrocara angulata NCBI
- CP1Sci354Het7mon Heterocyphon montanus NCBI
- CP1Sci354Het7dec Heterocyphon decussatus NCBI
- CP1Sci354Het7tri Heterocyphon triangularis NCBI
- CP1Sci354Het7kei Heterocyphon keiraensis NCBI
- CP1Sci354Het7elo Heterocyphon elongatus NCBI
- CP1Sci354He7obs Herthania obscurata NCBI
- CP1Sci354Ps7min Pseudomicrocara minor NCBI
- CP1Sci354Ac7mac Accolabass maculatus NCBI
- CP1Sci354Ac7vic Accolabass victoriensis NCBI
- CP1Sci354Het7spe Heterocyphon spencei NCBI
- CP1Sci354Ps7ruf Pseudomicrocara rufusensis NCBI
- CP1Sci354Ac7par Accolabass parvus NCBI
- CP1Sci354Ps7atk Pseudomicrocara atkinsoni NCBI
- CP1Sci354Ps7occ Pseudomicrocara occidentalis NCBI
- CP1Sci354JH2010 Scirtidae JH2010 NCBI
- CP1Sci354Ps7pic Pseudomicrocara picta NCBI
- CP1Sci354RK0166 Scirtidae RK0166 NCBI
- CP1Sci354Ps7Sty Pseudomicrocara StyxForest NCBI
- CP1Sci354Ps7var Pseudomicrocara variabilis NCBI
- CP1Sci354Ps7unc Pseudomicrocara uncata NCBI
- CP1Sci354Co7BMNH696331 Contacyphon BMNH696331 NCBI
- CP1Sci354RK0161 Scirtidae RK0161 NCBI
- CP1Sci354Co7cam Contacyphon camp NCBI
- CP1Sci354Co7Neu Contacyphon Neusiedlersee NCBI
- CP1Sci354Co7lae Contacyphon laevipennis NCBI
- CP1Sci354Cy7var Cyphon variabilis 2VGB.idba.12\_MMG\_ANNOT\_FROM\_BARCODE
- CP1Sci354Cy7 Cyphon sp. NC\_011320
- CP1Sci354Co7BT0012 Contacyphon BT0012 NCBI
- CP1Sci354Co7hil Contacyphon hilaris NCBI
- CP1Sci354Co7pub Contacyphon pubescens NCBI
- CP1Sci354Co7var Contacyphon variabilis NCBI
- CP1Sci354Co7pad Contacyphon padi NCBI
- CP1Sci354Co7phr Contacyphon phragmiteticola NCBI
- CP1Sci354Ps7hyl Pseudomicrocara hylaios NCBI
- CP1Sci354Ps7oll Pseudomicrocara olliffi NCBI
- CP1Sci354Mac7sca Macroscyllus scalaris NCBI
- CP1Sci354Pr7ins Prionocyphon insolitus NCBI
- CP1Sci354Pr7lam Prionocyphon lamingtonensis NCBI
- CP1Sci354Pr7lat Prionocyphon latummandibularis NCBI
- CP1Sci354Pr7mac Prionocyphon macroflavidus NCBI
- CP1Sci354Co7och Contacyphon ochraceus NCBI
- CP1Sci354Eu7aqu Eurycyphon aquilus NCBI
- CP1Sci354Eu7ful Eurycyphon fulvus NCBI
- CP1Sci354Co7lin Contacyphon lindensis NCBI
- CP1Sci354Co7She Contacyphon SherbrookForest NCBI
- CP1Sci354Co7CW300 Contacyphon CW300 NCBI
- CP1Sci354Co7Cem Contacyphon CementCK NCBI
- CP1Sci354Co7Dor Contacyphon Dorriggo NCBI
- CP1Sci354Co7War Contacyphon Warra NCBI
- CP1Sci354Co7CW340 Contacyphon CW340 NCBI
- CP1Sci354Co7Can Contacyphon Canal NCBI
- CP1Sci354Co7Rd Contacyphon Rd NCBI
- CP1Sci354Au7Fro Austrocyphon FrodshamsPass NCBI
- CP1Sci354Au7fla Austrocyphon flagellifer NCBI
- CP1Sci354Co7Gir Contacyphon GirraweenNP NCBI
- CP1Sci354Au7pic Austrocyphon pictus NCBI
- CP1Sci354Au7fur Austrocyphon furcatus NCBI
- CP1Sci354Au7tri Austrocyphon tribulator NCBI
- CP1Sci354Au7spi Austrocyphon spiculifer NCBI
- CP1Sci354Au7fen Austrocyphon fenestratus NCBI
- CP1Sci354Au7wat Austrocyphon watisi NCBI
- CP1Sci354Eu7APV2001 Eucinetus APV2001 NCBI
- CP1Sci354Eu7 Eucinetus sp. 2mie.idba.97\_MMG\_ANNOT\_FROM\_BARCODE
- CP1Sci354Eu7 Eucinetus sp. 1mie.idba.155\_MMG\_ANNOT\_FROM\_BARCODE
- CP1Sci354Eu7hae Eucinetus haemorrhoidolis 842710 Eucinetidae Eucinetus idba\_contig\_14\_MERGED

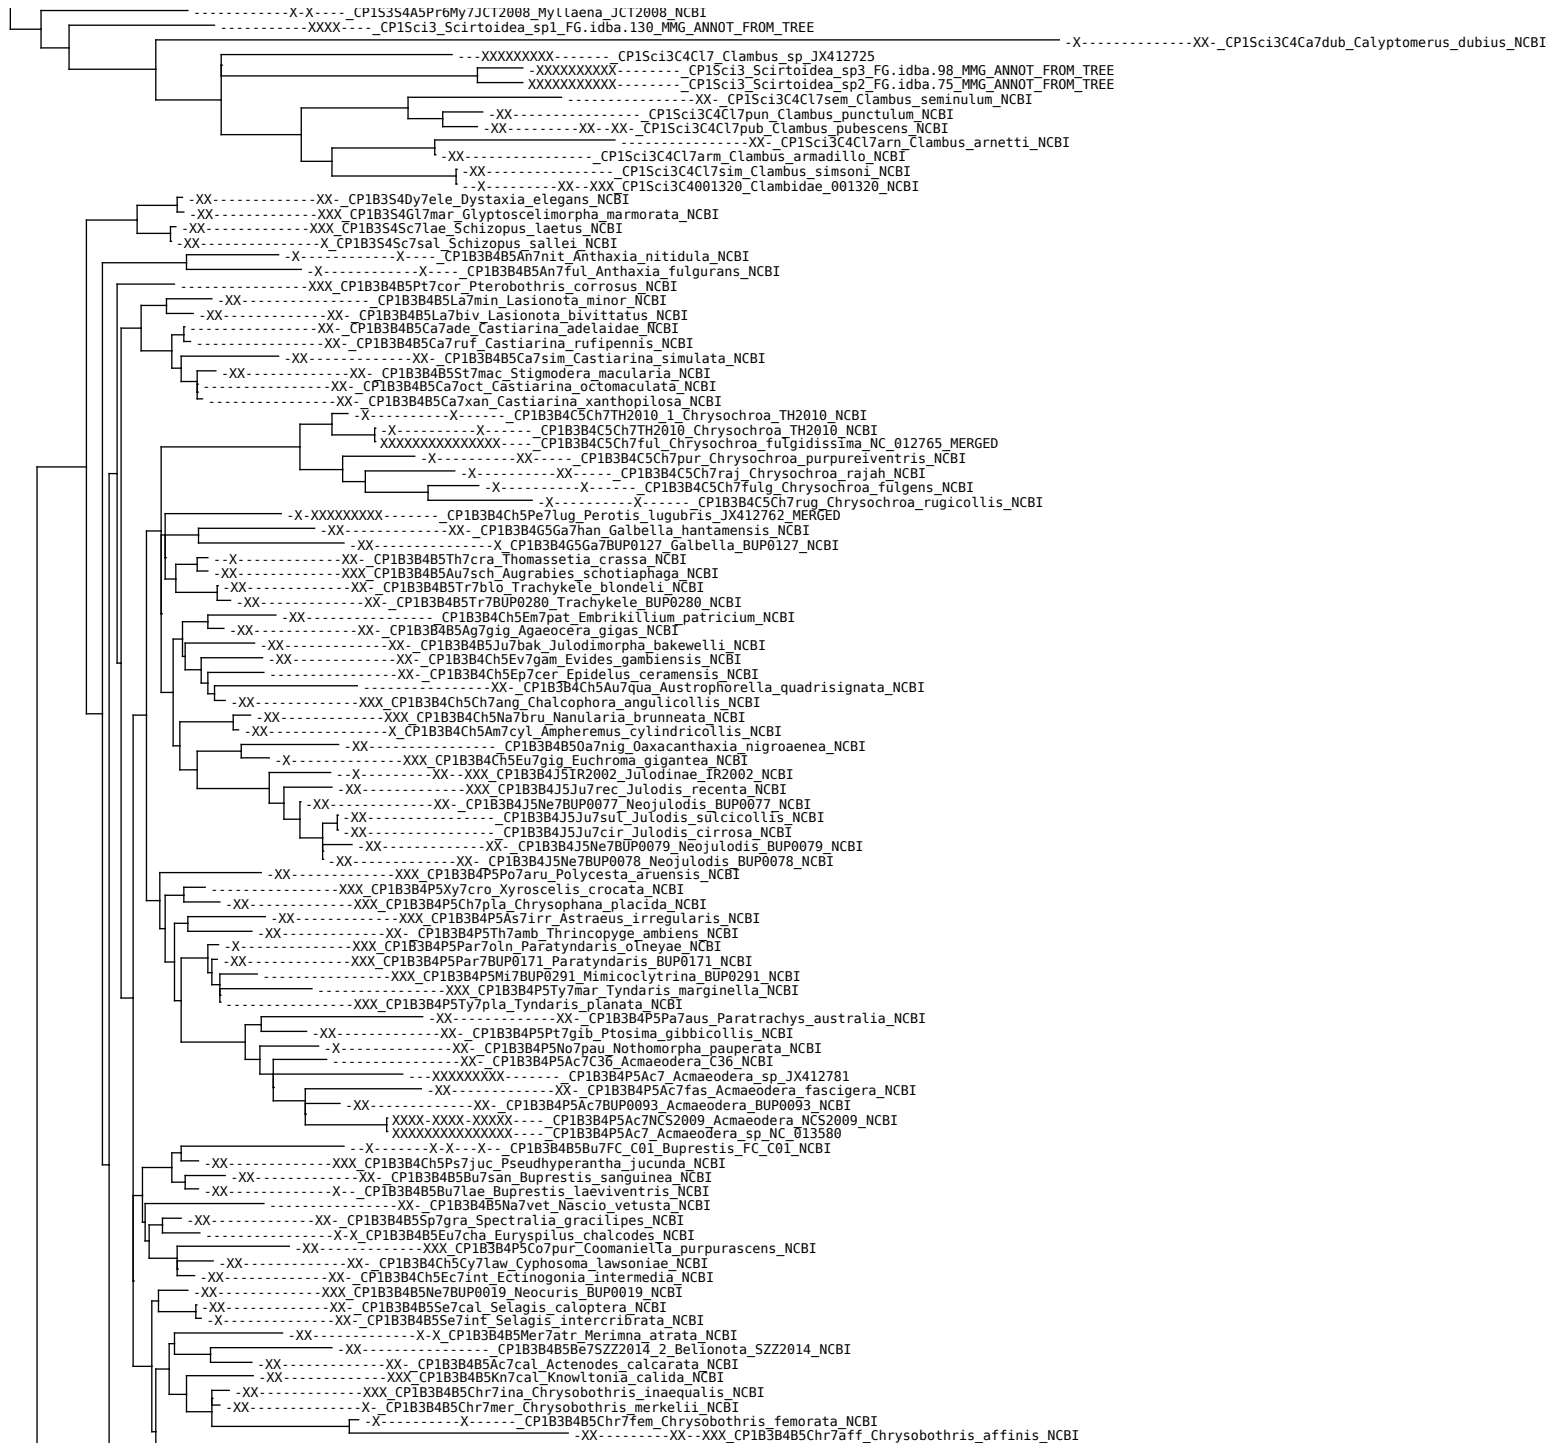

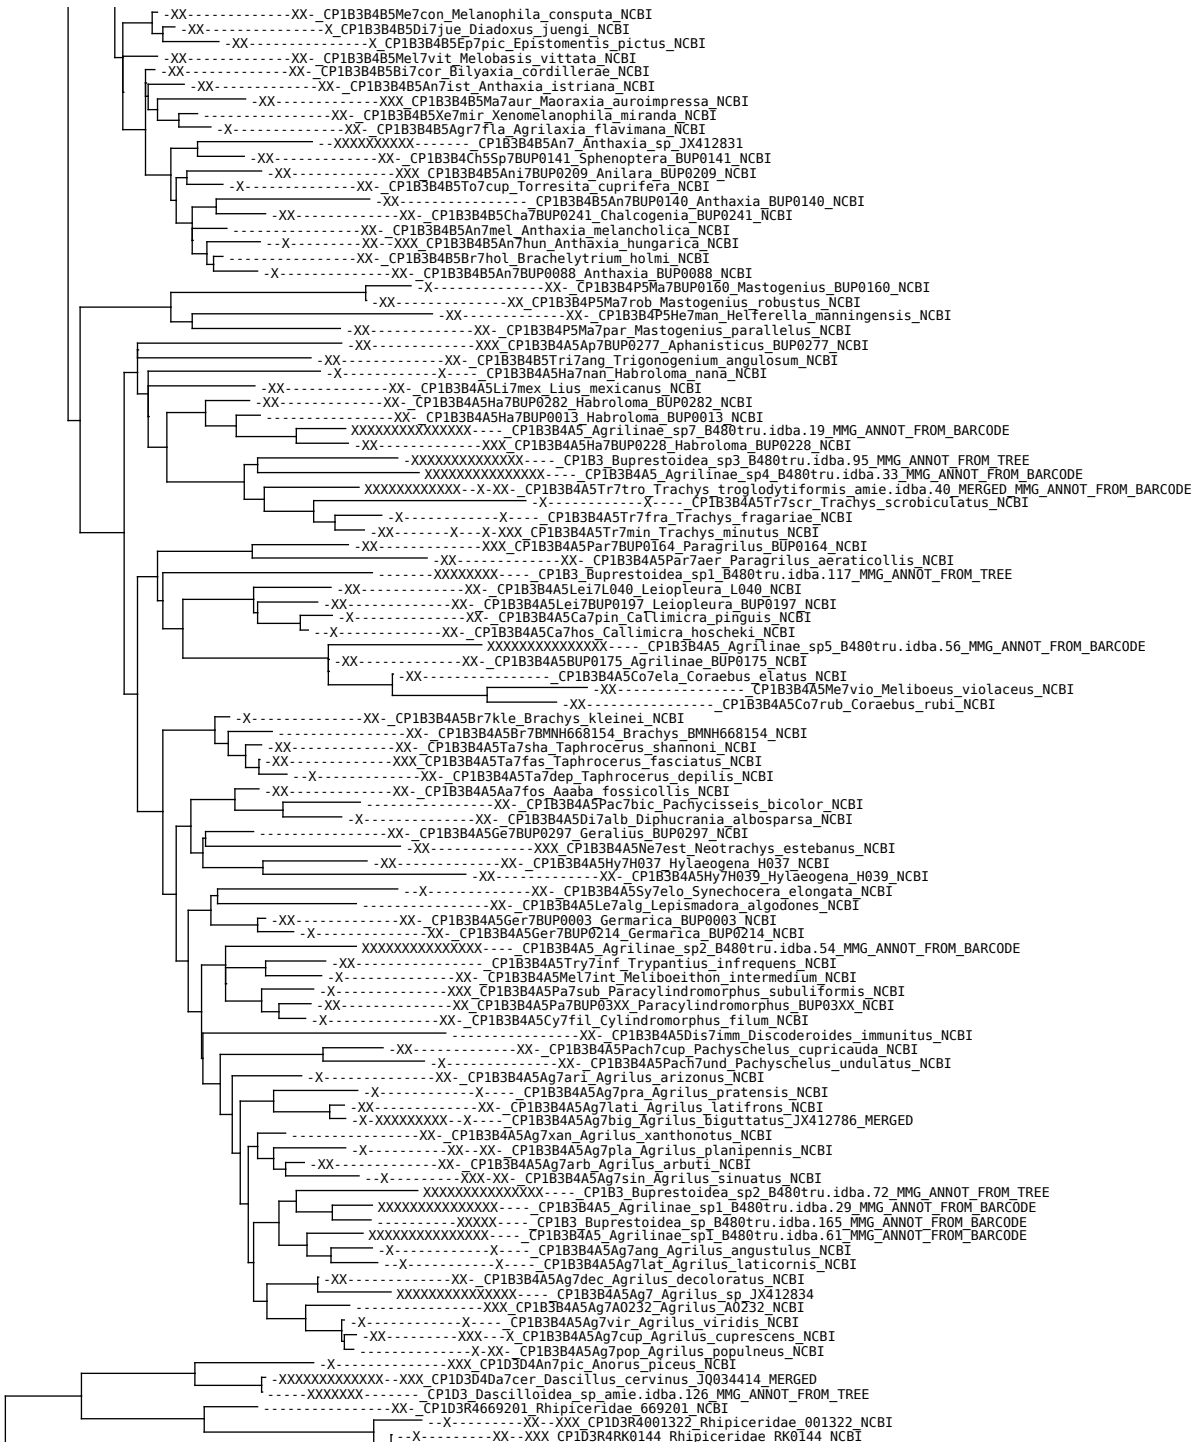

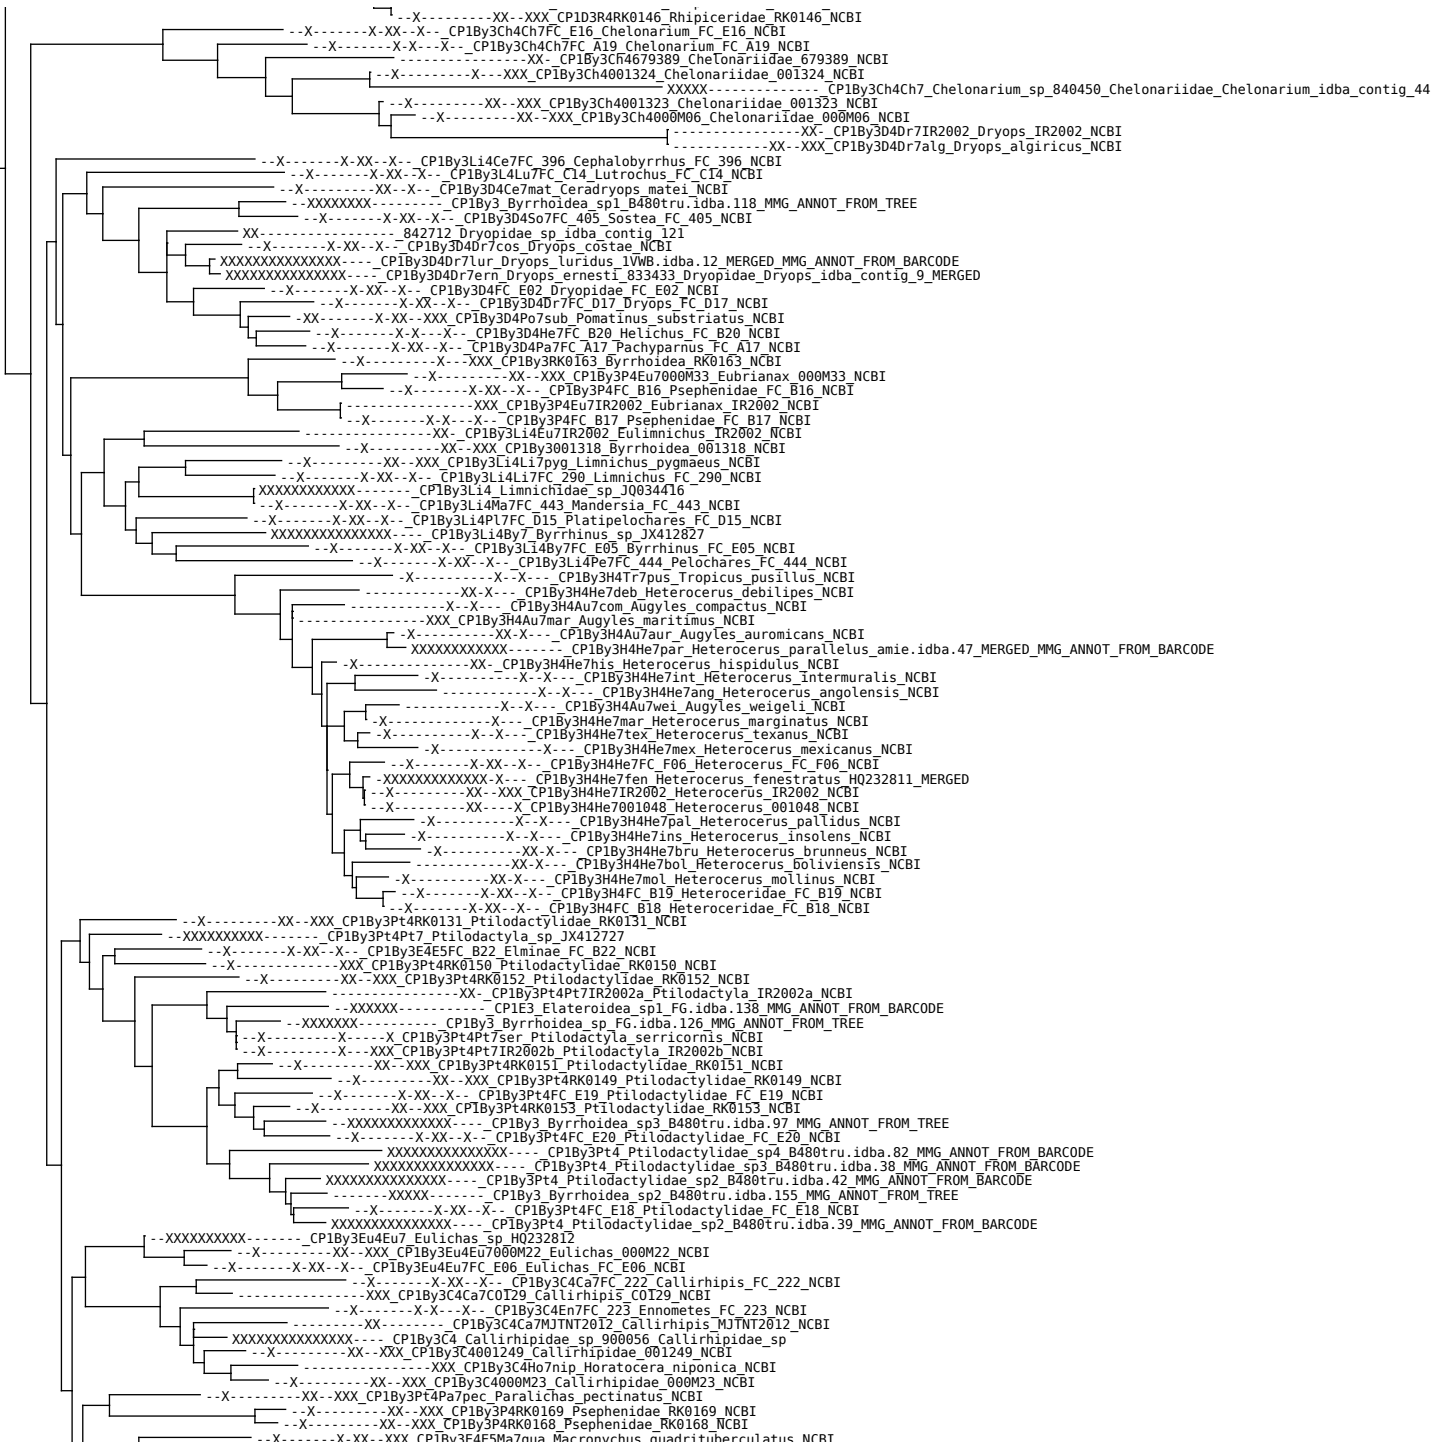

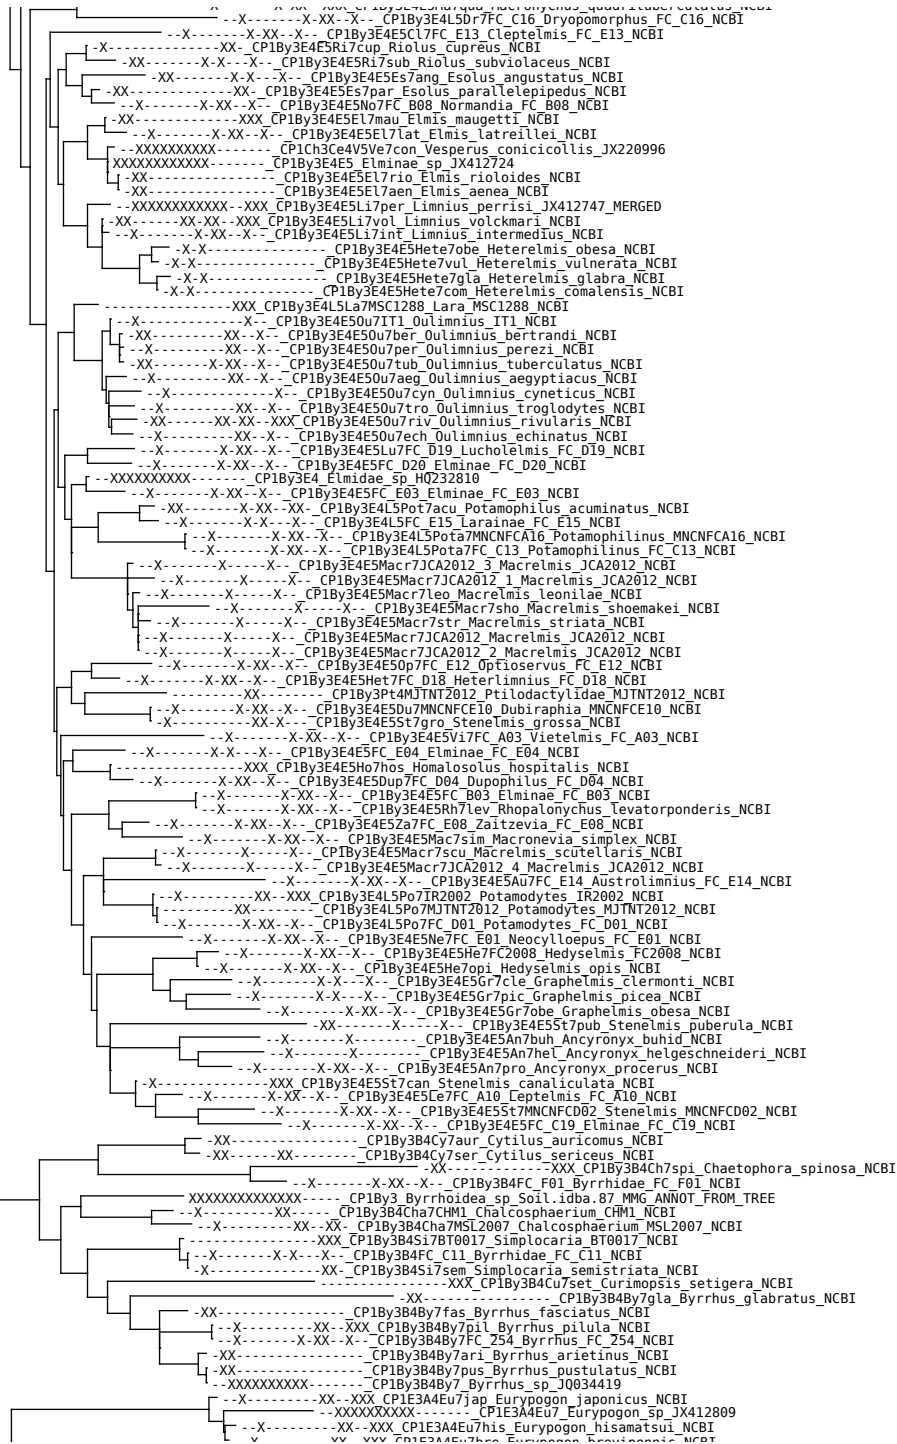





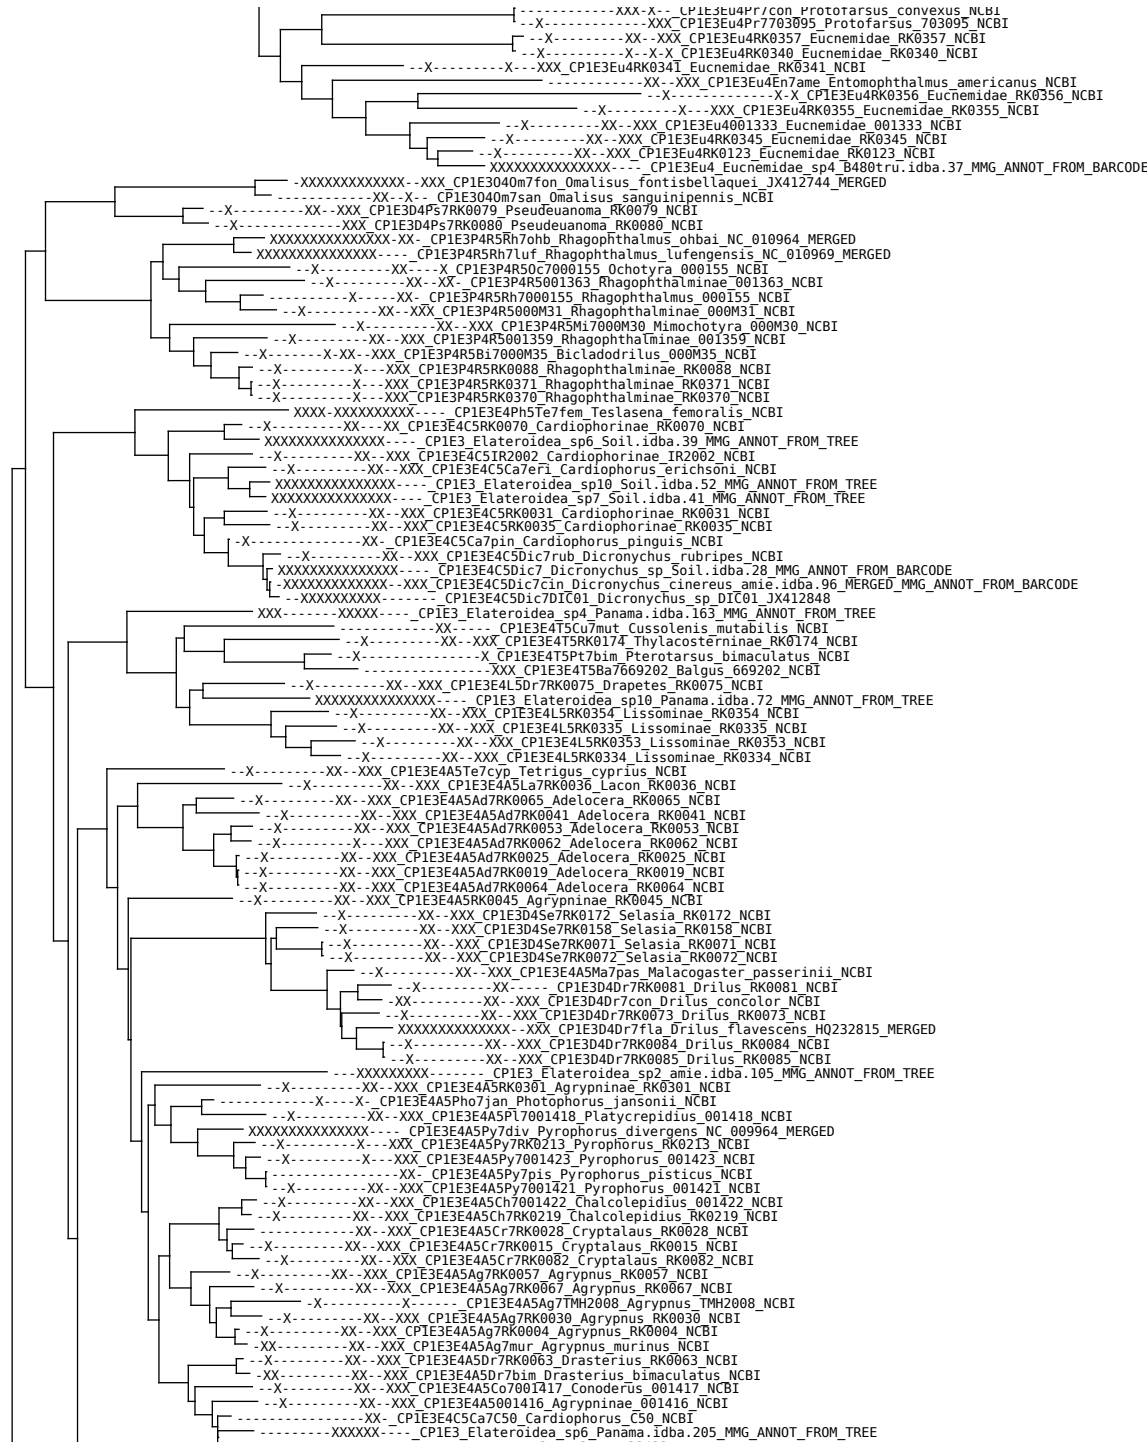

-X-.....XX-.... CP1E3E4A5Aeo7mel\_Aeolus mellillus NCBI  
-X-.....XX-XXX\_CP1E3E4E5Pa7gut\_Panspaesus\_gutlatus NCBI  
XXXXXXXXXXXX CP1E3E4E5Hyp7rini\_Hypogastrus\_inctus amie.idba.58 MERGED\_MMG\_ANNOT\_FROM\_BARCODE  
-X-.....XX-XXX\_CP1E3E4E5HRK0403\_Hemipodinae RK0403 NCBI  
-X-.....XX-XXX\_CP1E3E4E5RK0020\_Elaterinae RK0020 NCBI  
-X-.....XX-XXX\_CP1E3E4E5RK0066\_Elaterinae RK0066 NCBI  
-X-.....XX-..... CP1E3E4E5Am7nigr\_Ampedus nigroflavus NCBI  
-X-.....XX-XXX\_CP1E3E4E5E17RK0013\_Elater RK0013 NCBI  
XXXXXXXXXXXX CP1E3\_Elateroidea sp10 amie.idba.41 MMG\_ANNOT\_FROM\_TREE  
-X-.....XX-XXX\_CP1E3E4E5Mu7001414\_Mulsanteus 001414 NCBI  
-X-.....XX-.....XX-XXX\_CP1E3E4E5An7RK0061\_Anchastus RK0061 NCBI  
-X-.....XX-XXX\_CP1E3E4E5An7RK0060\_Anchastus RK0060 NCBI  
-X-.....XX-XXX\_CP1E3E4E5An7RK0056\_Anchastus RK0056 NCBI  
-X-.....XX-XXX\_CP1E3E4E5An7RK0051\_Anchastus RK0051 NCBI  
-X-.....XX-XXX\_CP1E3E4Ce5Ce7RK0142\_Cebrio RK0142 NCBI  
-X-.....XX-XXX\_CP1E3Ceb4Se7DDM0602\_Selonodon\_DDM0602 NCBI  
XXXXXXXXXXXX 679376\_Cebrioninae sp.idba.contig.5  
-X-.....XX-XXX\_CP1E3E4Ce5679376\_Cebrioninae 679376 NCBI  
XXXXXXXXXXXX CP1E3E4E5Da7mar\_Dalopius\_marginatus BIUK.idba.34 MERGED\_MMG\_ANNOT\_FROM\_BARCODE  
-X-.....X-..... CP1E3E4E5Ag7cri\_Agriotes criddlei NCBI  
XXXXXXXXXXXX CP1E3E4E5Id7pic\_Idolus picipennis amie.idba.67 MERGED\_MMG\_ANNOT\_FROM\_BARCODE  
XXXXXXXXXXXX CP1E3E4E5Ad7rac\_Adrastus\_rachifer amie.idba.32 MERGED\_MMG\_ANNOT\_FROM\_BARCODE  
-X-.....XX-XXX\_CP1E3E4E5RK0048\_Elaterinae RK0048 NCBI  
-X-.....XX-XXX\_CP1E3E4E5RK0059\_Elaterinae RK0059 NCBI  
-X-.....XX-XXX\_CP1E3E4E5RK0016\_Elaterinae RK0016 NCBI  
-X-.....XX-XXX\_CP1E3E4E5RK0017\_Elaterinae RK0017 NCBI  
-X-.....XX-XXX\_CP1E3E4E5RK0026\_Elaterinae RK0026 NCBI  
-X-.....XX-XXX\_CP1E3E4E5RK0027\_Elaterinae RK0027 NCBI  
-X-.....XXX\_CP1E3E4E5001413\_Elaterinae 001413 NCBI  
-X-.....XX-..... CP1E3E4E5Ag7pro\_Agriotes proximus NCBI  
-X-.....XX-XXX\_CP1E3E4E5Ag7acu\_Agriotes acuminatus NCBI  
XXXXXXXXXXXX CP1E3E4E5Ag7ust\_Agriotes ustulatus JX412737 MERGED  
XXXXXXXXXXXX CP1E3E4E5Ag7obs\_Agriotes obscurus 2VGB.idba.10 MERGED\_MMG\_ANNOT\_FROM\_BARCODE  
-X-.....XX-..... CP1E3E4E5Ag7lin\_Agriotes lineatus NCBI  
-X-.....XX-..... CP1E3E4E5Ag7ogu\_Agriotes ogoae NCBI  
-X-.....X-..... CP1E3E4E5Ag7spu\_Agriotes spufator NCBI  
-X-.....X-..... CP1E3E4E5Ag7sor\_Agriotes sordidus NCBI  
XXXXXXXXXXXX CP1E3\_Elateroidea sp5 Soil.idba.37 MMG\_ANNOT\_FROM\_TREE  
-X-.....XX-XXX\_CP1E3E4001237\_Elateridae 001237 NCBI  
-X-.....XX-XXX\_CP1E3E4E5A07001415\_Anoplischius 001415 NCBI  
-X-.....XX-XXX\_CP1E3E4E5RK0310\_Elaterinae RK0310 NCBI  
-X-.....XX-XXX\_CP1E3E4E5RK0404\_Elaterinae RK0404 NCBI  
-X-.....XX-XXX\_CP1E3E4E5RK0203\_Elaterinae RK0203 NCBI  
-X-.....XX-XXX\_CP1E3E4E5RK0406\_Elaterinae RK0406 NCBI  
-X-.....XX-XXX\_CP1E3E4E5RL7RK0055\_Ludioschea RK0055 NCBI  
-X-.....XX-XXX\_CP1E3E4E5ML7RK0024\_Ludioschema RK0024 NCBI  
-X-.....XX-..... CP1E3E4E5P7tib\_Procraerus tibialis NCBI  
-X-.....XX-XXX\_CP1E3E4E5RK0400\_Elaterinae RK0400 NCBI  
XXXXXXXXXXXX CP1E3E4\_Elateridae sp1\_Panama.idba.156 MMG\_ANNOT\_FROM\_BARCODE  
XXXXXXXXXXXX CP1E3\_Elateroidea sp8\_Panama.idba.220 MMG\_ANNOT\_FROM\_TREE  
XXXXXXXXXXXX CP1E3E4\_Elateridae sp2\_B480tru.idba.41 MMG\_ANNOT\_FROM\_BARCODE  
XXXXXXXXXXXX CP1E3E4\_Elateridae sp2\_B480tru.idba.40 MMG\_ANNOT\_FROM\_BARCODE  
-X-.....XX-XXX\_CP1E3E4E5RK0014\_Denticollinae RK0014 NCBI  
-X-.....XX-XXX\_CP1E3E4E5To7001420\_Tomicephalus 001420 NCBI  
XXXXXXXXXXXX CP1E3E4\_Elateridae sp3\_B480tru.idba.44 MMG\_ANNOT\_FROM\_BARCODE  
-X-.....XX-XXX\_CP1E3E4E5P7hum\_Priopus humeralis NCBI  
-X-.....XX-XXX\_CP1E3E4E5P7orn\_Priopus ornatus NCBI  
-X-.....XX-XXX\_CP1E3E4E5Am7san\_Ampedus sanguinolentus NCBI  
-X-.....XX-XXX\_CP1E3E4E5Am7RK0005\_Ampedus RK0005 NCBI  
-X-.....XX-XXX\_CP1E3E4E5Am7ruf\_Ampedus rufipennis NCBI  
-X-.....XX-XXX\_CP1E3E4E5Am7RK0018\_Ampedus RK0018 NCBI  
-X-.....XX-XXX\_CP1E3E4E5Am7bal\_Ampedus baTteatus NCBI  
-X-.....XX-..... CP1E3E4E5Am7nige\_Ampedus nigerrimus NCBI  
-X-.....XX-XXX\_CP1E3E4E5Am7sin\_Ampedus sinuatus NCBI  
-X-.....XX-XXX\_CP1E3E40507001419\_Octinodes 001419 NCBI  
-X-.....XX-XXX\_CP1E3E40507001419\_Octinodes 001419 NCBI  
XXXXXXXXXXXX CP1E3E4\_Elateridae sp6\_B480tru.idba.94 MMG\_ANNOT\_FROM\_BARCODE  
-X-.....XX-..... CP1E3E4M5Me7leg\_Melanotus legatus NCBI  
XXXXXXXXXXXX CP1E3\_Elateroidea sp8\_Soil.idba.46 MMG\_ANNOT\_FROM\_TREE  
-X-.....XX-..... CP1E3E4M5Me7cas\_Melanotus castanipes NCBI  
XXXXXXXXXXXX CP1E3E4M5Me7vil\_Melanotus villosus 2VGB.idba.11 MERGED\_MMG\_ANNOT\_FROM\_BARCODE  
-X-.....XX-..... CP1E3E4M5Me7vil\_Melanotus villosus amie.idba.144 MMG\_ANNOT\_FROM\_BARCODE  
-X-.....XX-..... CP1E3E4M5Me7ind\_Melanotus indistinctus NCBI  
-X-.....XX-..... CP1E3E4M5Me7lan\_Melanotus lanei NCBI  
-X-.....XX-..... CP1E3E4M5Me7pil\_Melanotus pilosus NCBI  
-X-.....XX-..... CP1E3E4M5Me7ver\_Melanotus verberans NCBI  
-X-.....XX-..... CP1E3E4M5Me7sim\_Melanotus similis NCBI  
-X-.....XX-..... CP1E3E4M5Me7opa\_Melanotus opacicolis NCBI  
-X-.....XX-..... CP1E3E4A5Co7Liv\_Conderus lividus NCBI  
-X-.....XX-..... CP1E3E4M5Me7dep\_Melanotus depressus NCBI  
-X-.....XX-..... CP1E3E4M5Me7die\_Melanotus dietrichi NCBI  
-X-.....XX-..... CP1E3E4M5Me71817\_Melanotus 1817 NCBI  
-X-.....XX-..... CP1E3E4M5Me7cri\_Melanotus cribulosus NCBI  
-X-.....XX-XXX\_CP1E3E4Ce5D17RK0145\_Diplophoenicus RK0145 NCBI  
-X-.....XXXX-..... CP1E3\_Elateroidea sp4 amie.idba.129 MMG\_ANNOT\_FROM\_TREE  
-X-.....XXXX-..... CP1E3\_Elateroidea sp8 amie.idba.181 MMG\_ANNOT\_FROM\_TREE  
XXXXXXXXXXXX CP1E4D5Ca7bip\_Celambus bipustulatus BIUK.idba.31 MERGED\_MMG\_ANNOT\_FROM\_BARCODE  
-X-.....XX-XXX\_CP1E3E4De5An7cur\_Anostirus purpurus NCBI  
XXXXXXXXXXXX CP1E3E4De5An7cas\_Anostirus castaneus amie.idba.28 MERGED\_MMG\_ANNOT\_FROM\_BARCODE  
-X-.....XX-XXX\_CP1E3E4D5P17RK0029\_Platiana RK0029 NCBI  
-X-.....XX-..... CP1E3E4N5F17cur\_Fleutiauxellus curatus NCBI  
-X-.....XX-XXX\_CP1E3E4N5Z07RK0044\_Zorocho RK0044 NCBI  
-X-.....XX-XXX\_CP1E3E4N5Z07RK0043\_Zorocho RK0043 NCBI  
-X-.....XX-XXX\_CP1E3E4N5O7RK0049\_Quasimus RK0049 NCBI  
-X-.....XX-..... CP1E3E4N5RK0058\_Negastriinae RK0058 NCBI  
-X-.....XX-XXX\_CP1E3E4N5O7RK0050\_Quasimus RK0050 NCBI  
-X-.....XX-..... CP1E3E4De5Se7cru\_Selatosomus cruciatus NCBI  
-X-.....XX-XXX\_CP1E3E4De5Hy7RK0042\_Hypolithus RK0042 NCBI  
-X-.....XX-..... CP1E3E4O5Pe7bab\_Pectocera babai NCBI  
-X-.....XX-..... CP1E3E4O5Pe7for\_Pectocera fortunei NCBI

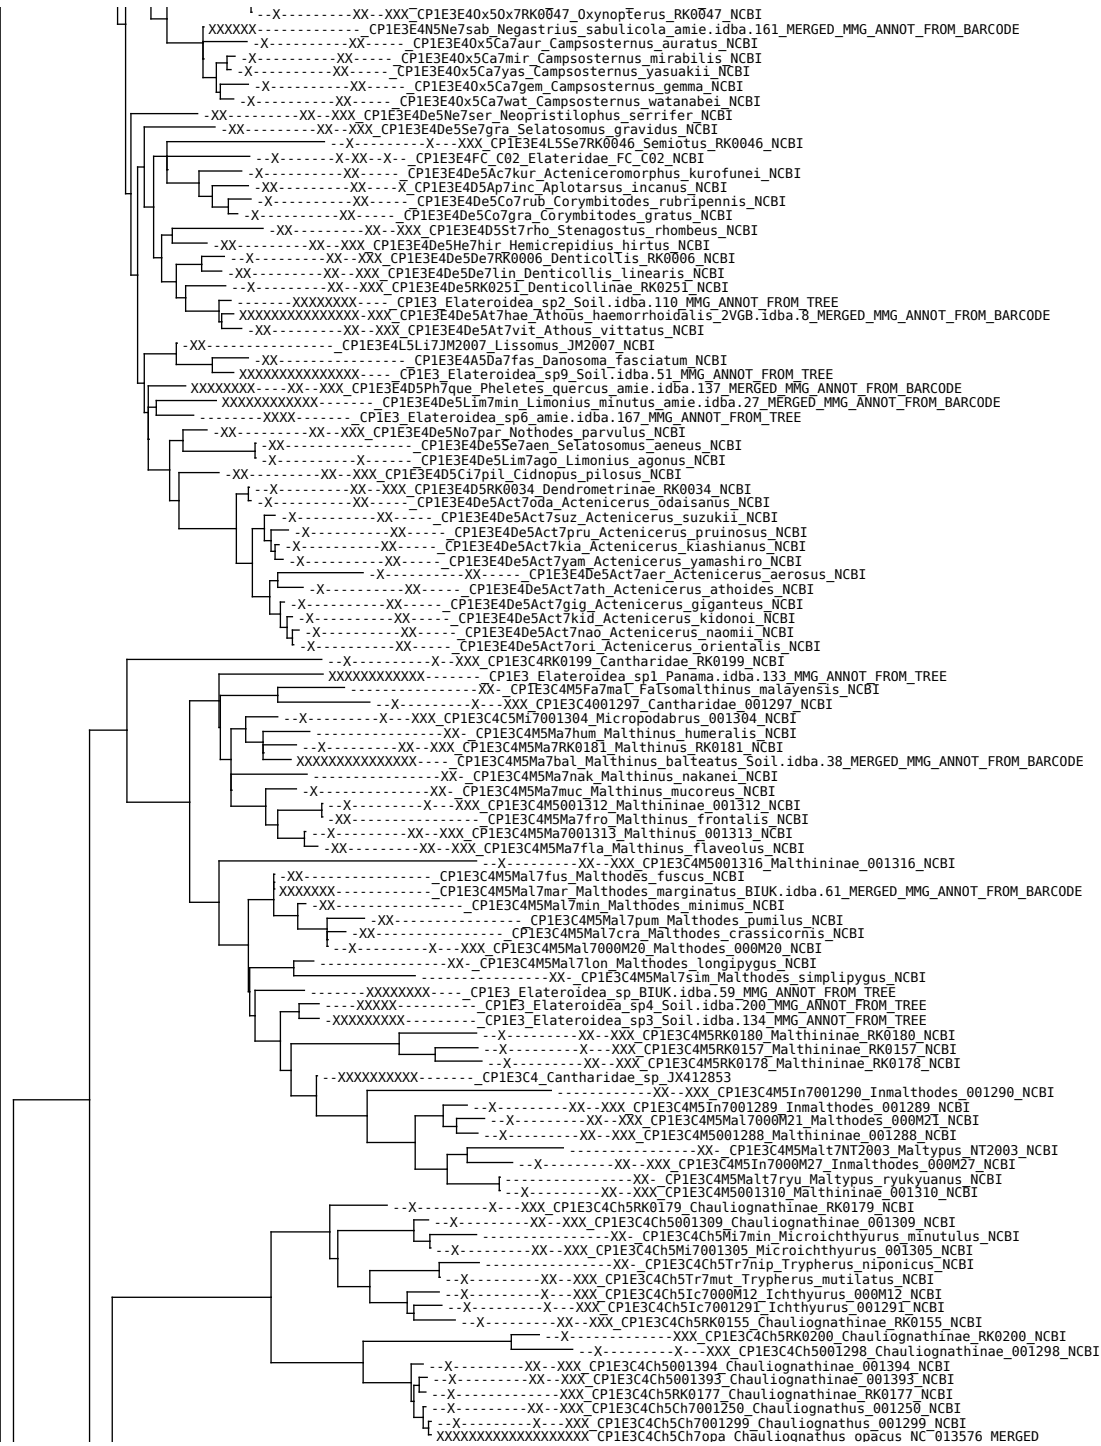

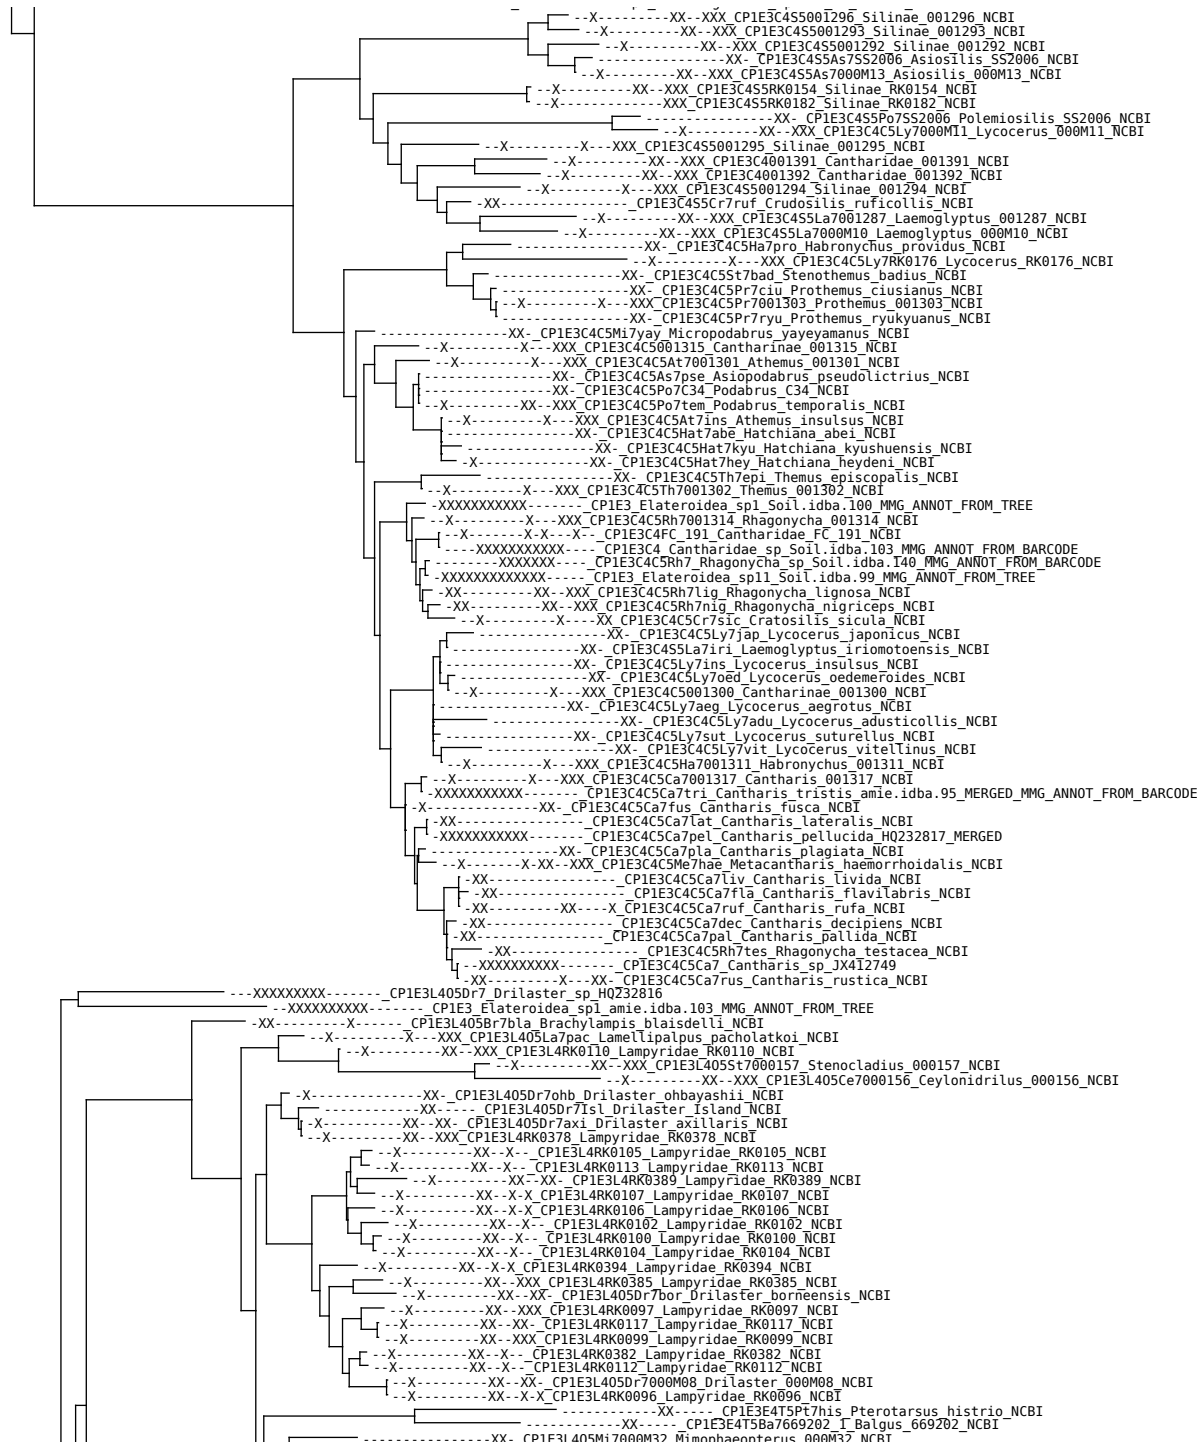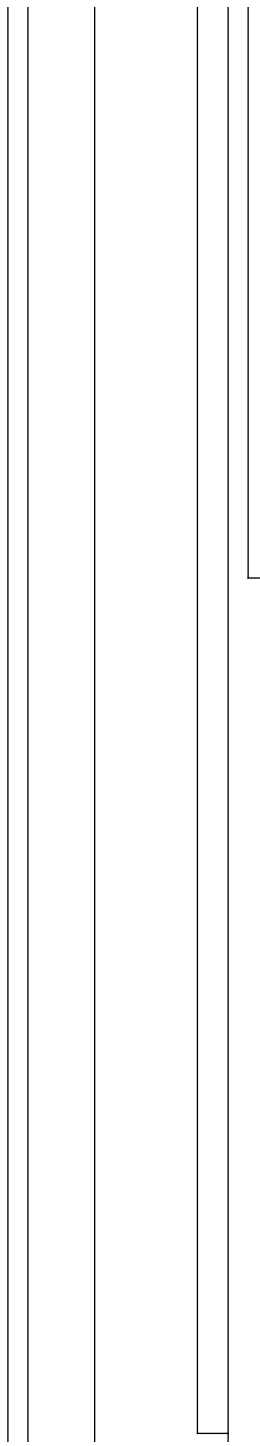

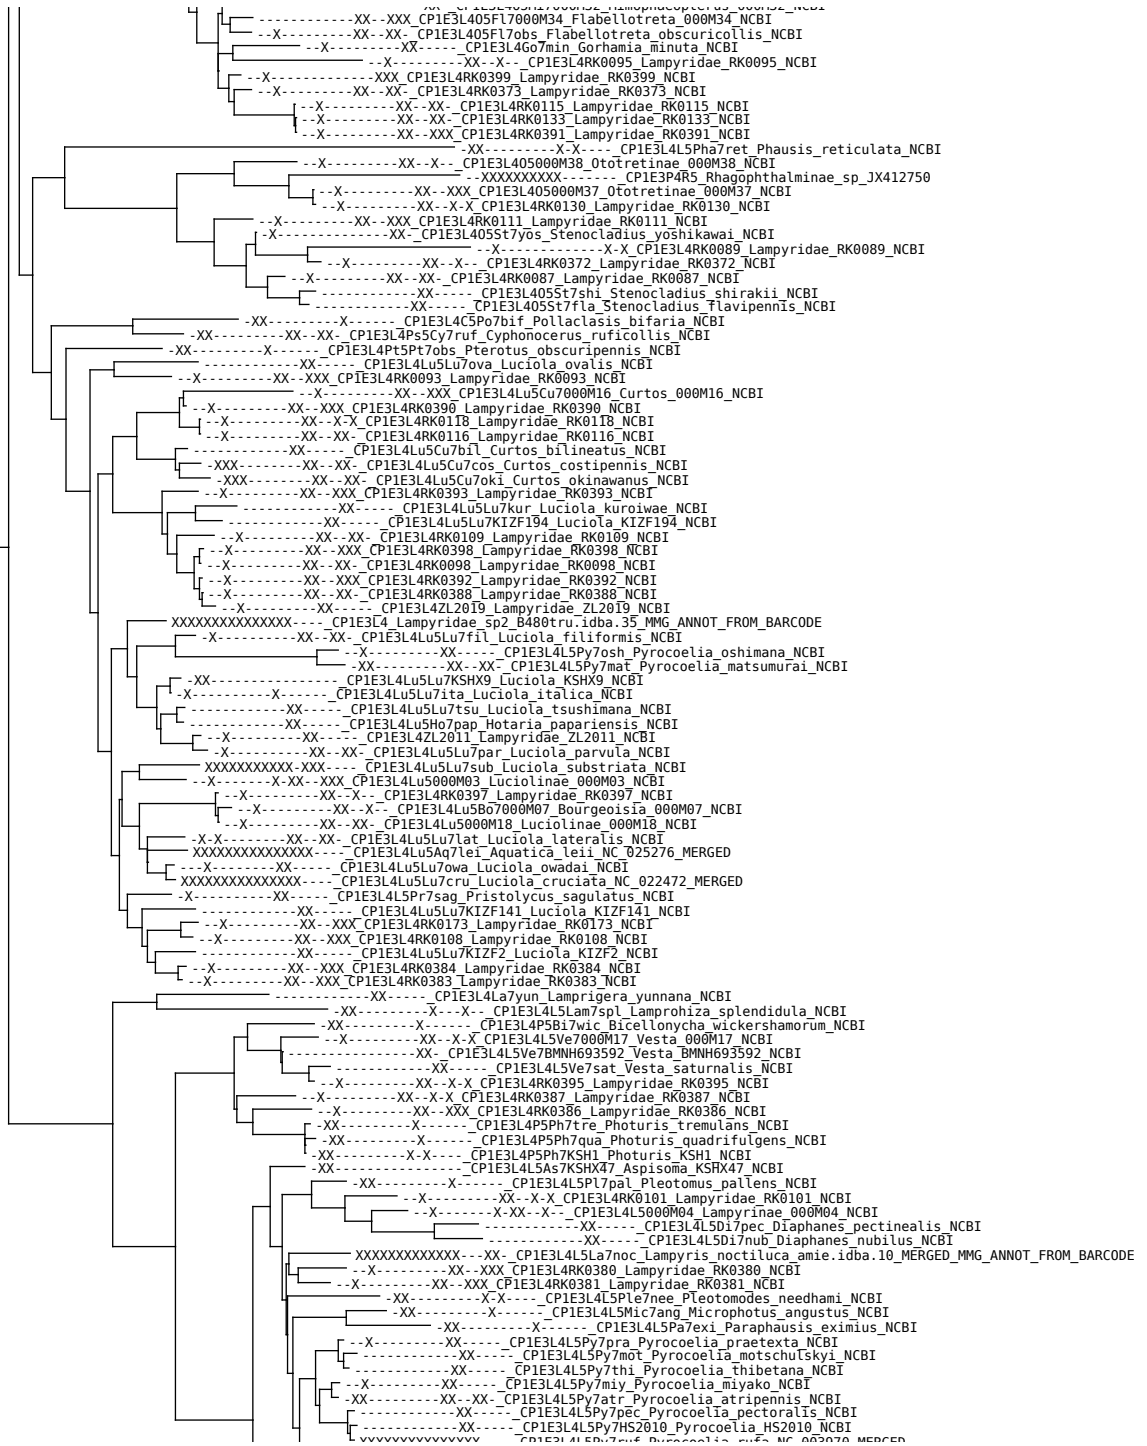

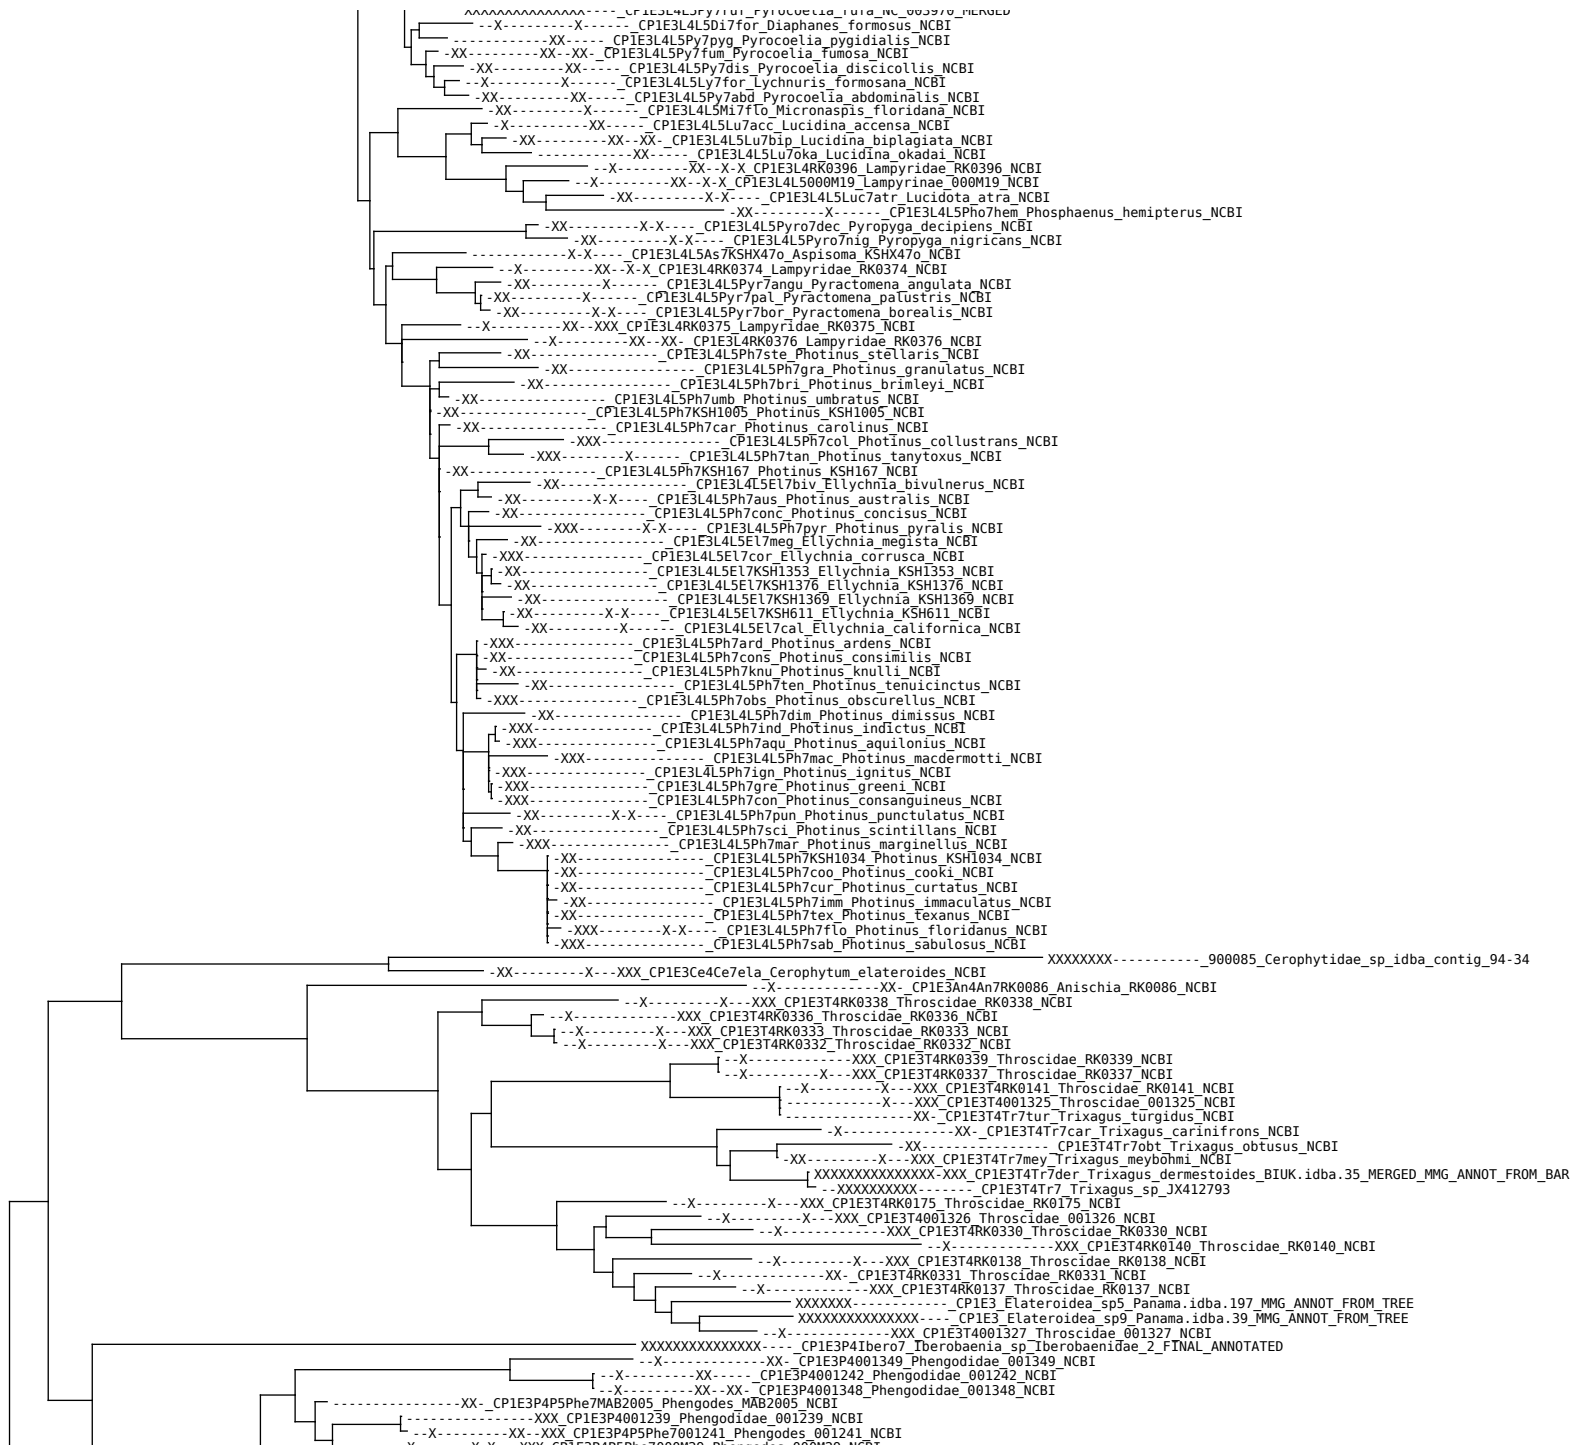

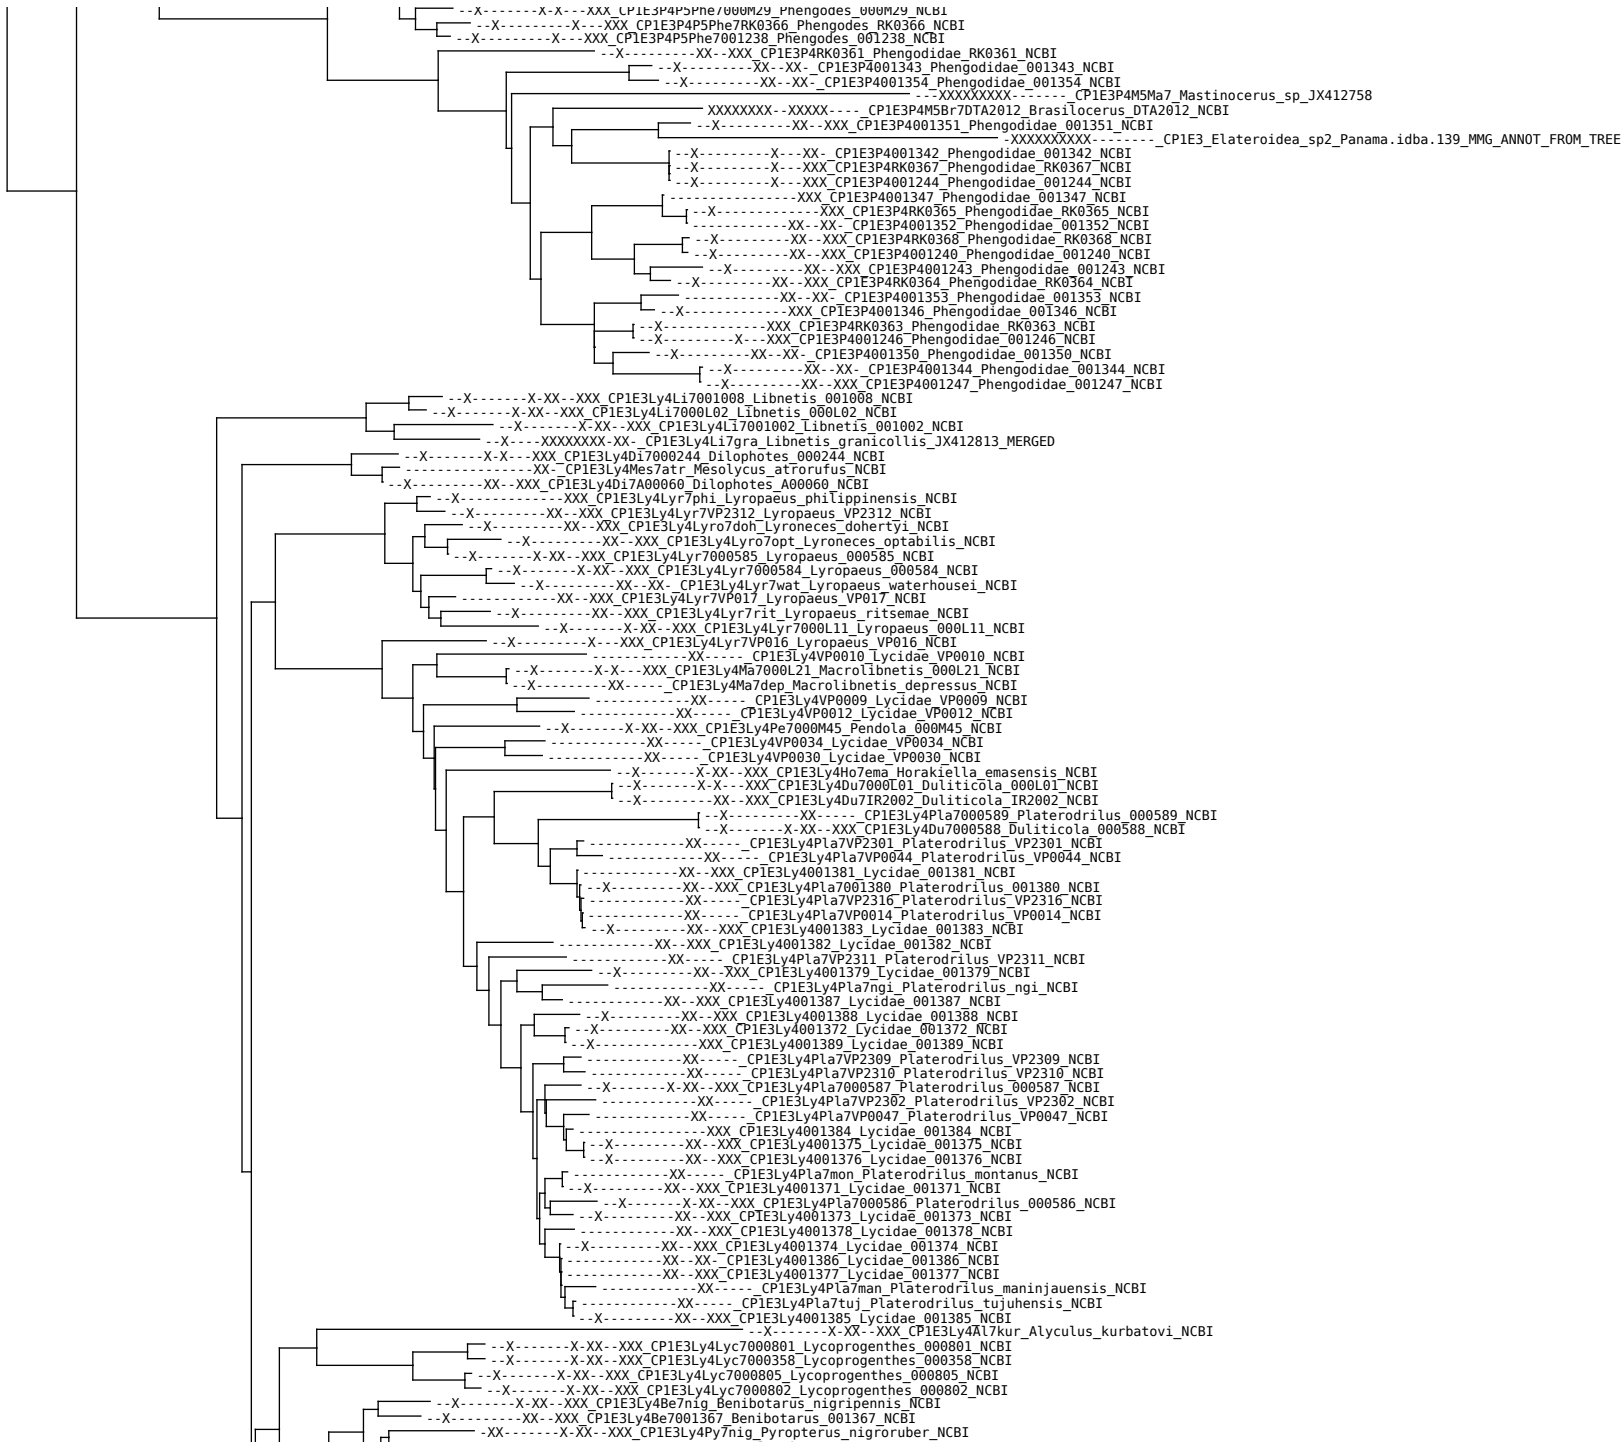



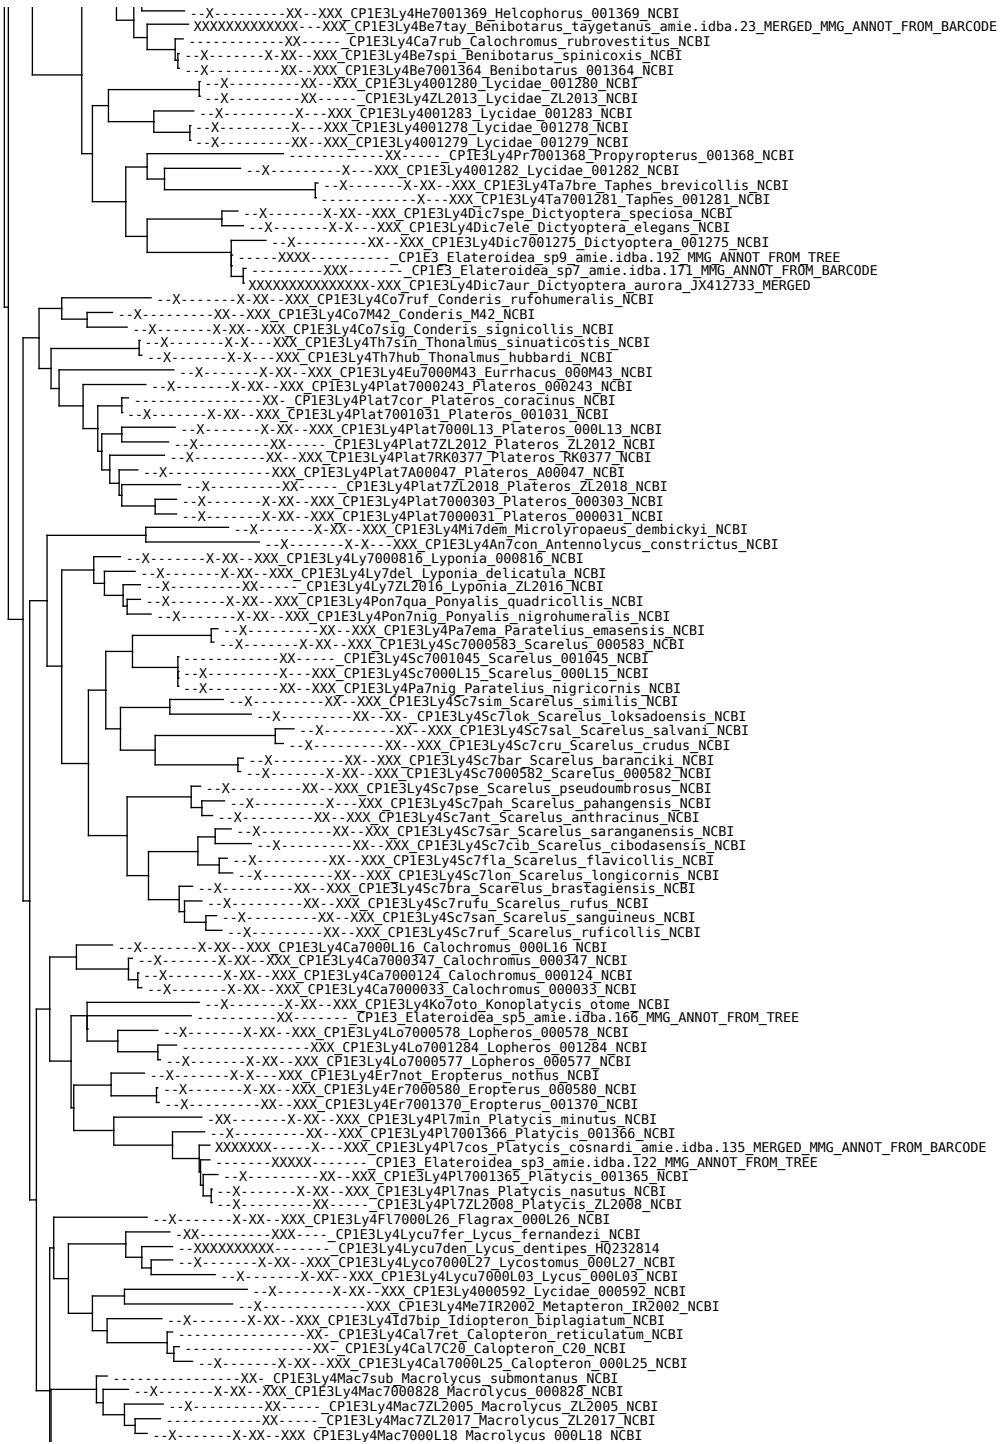

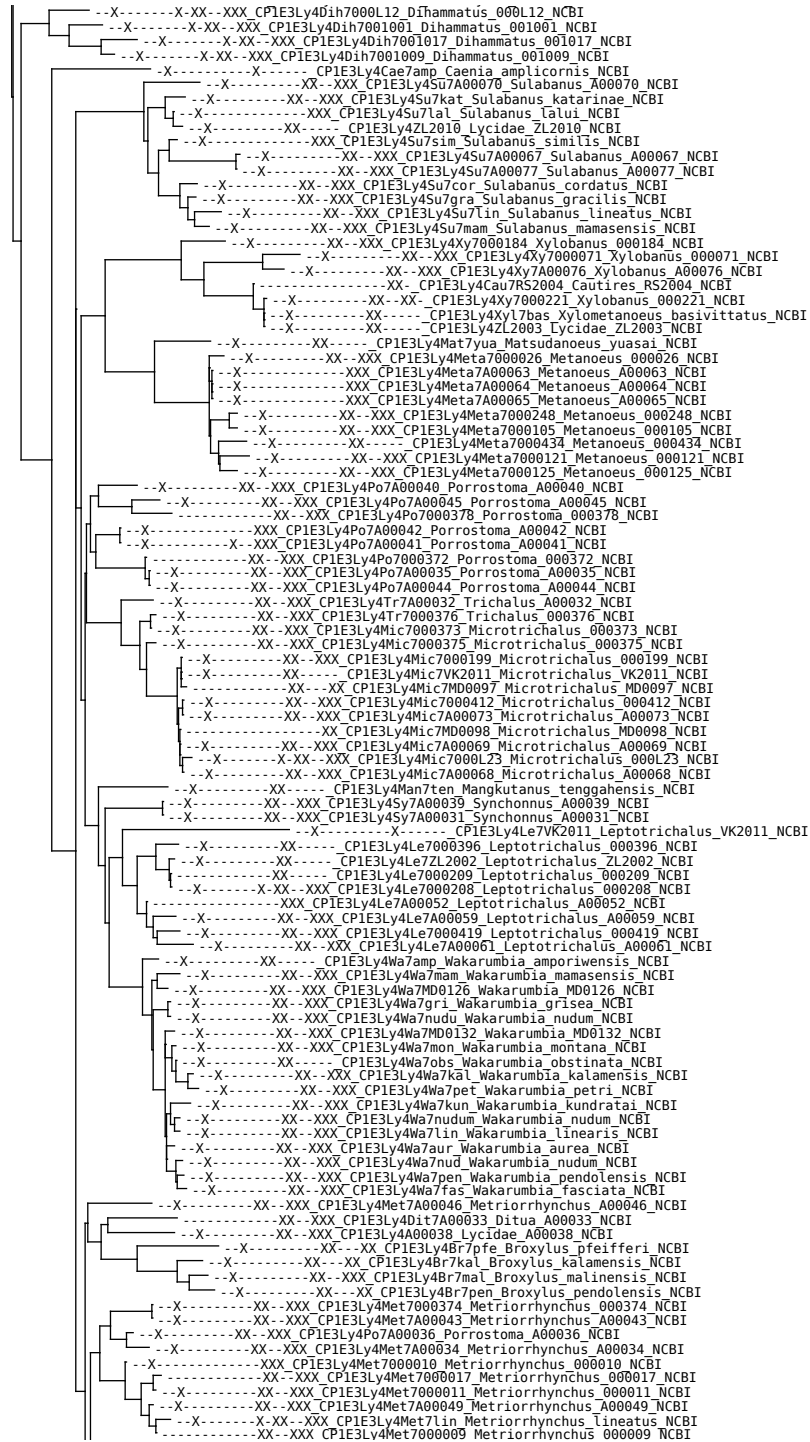

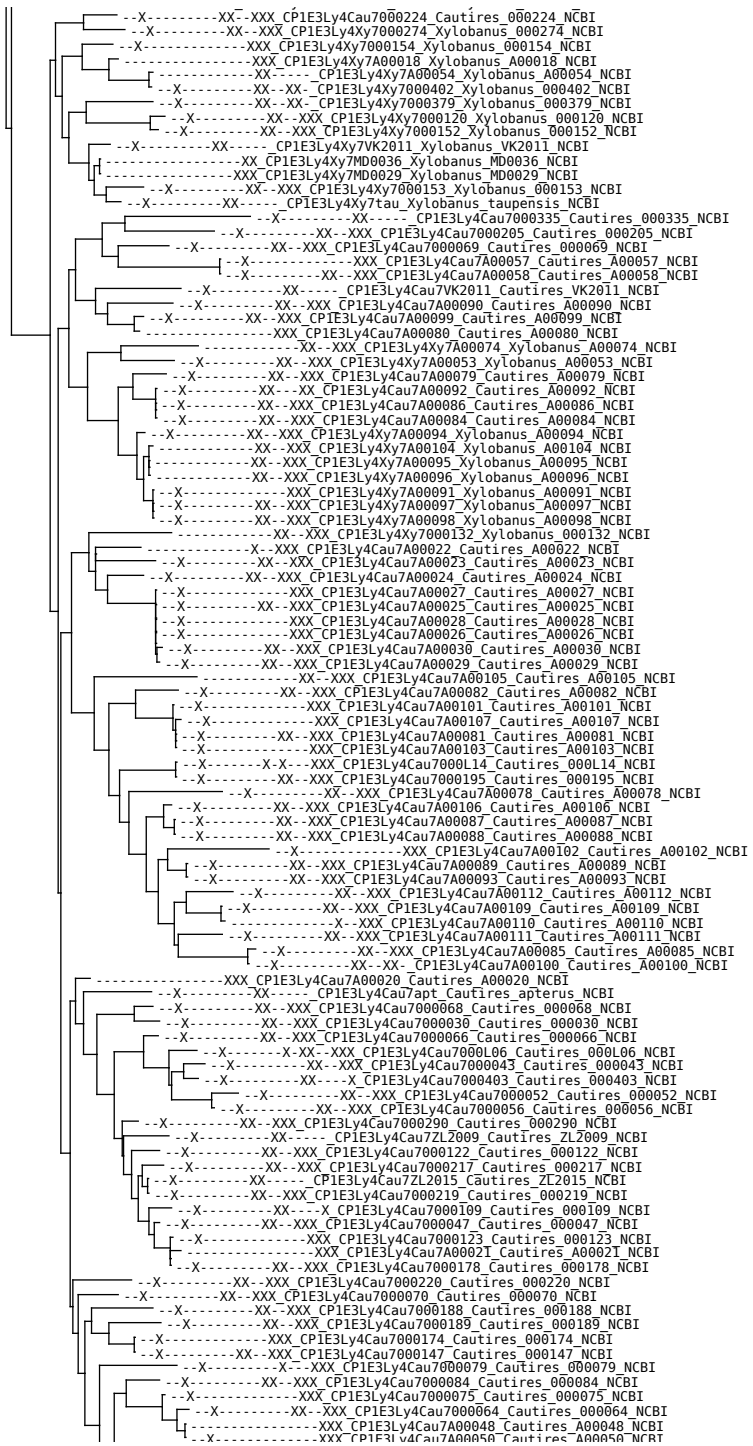

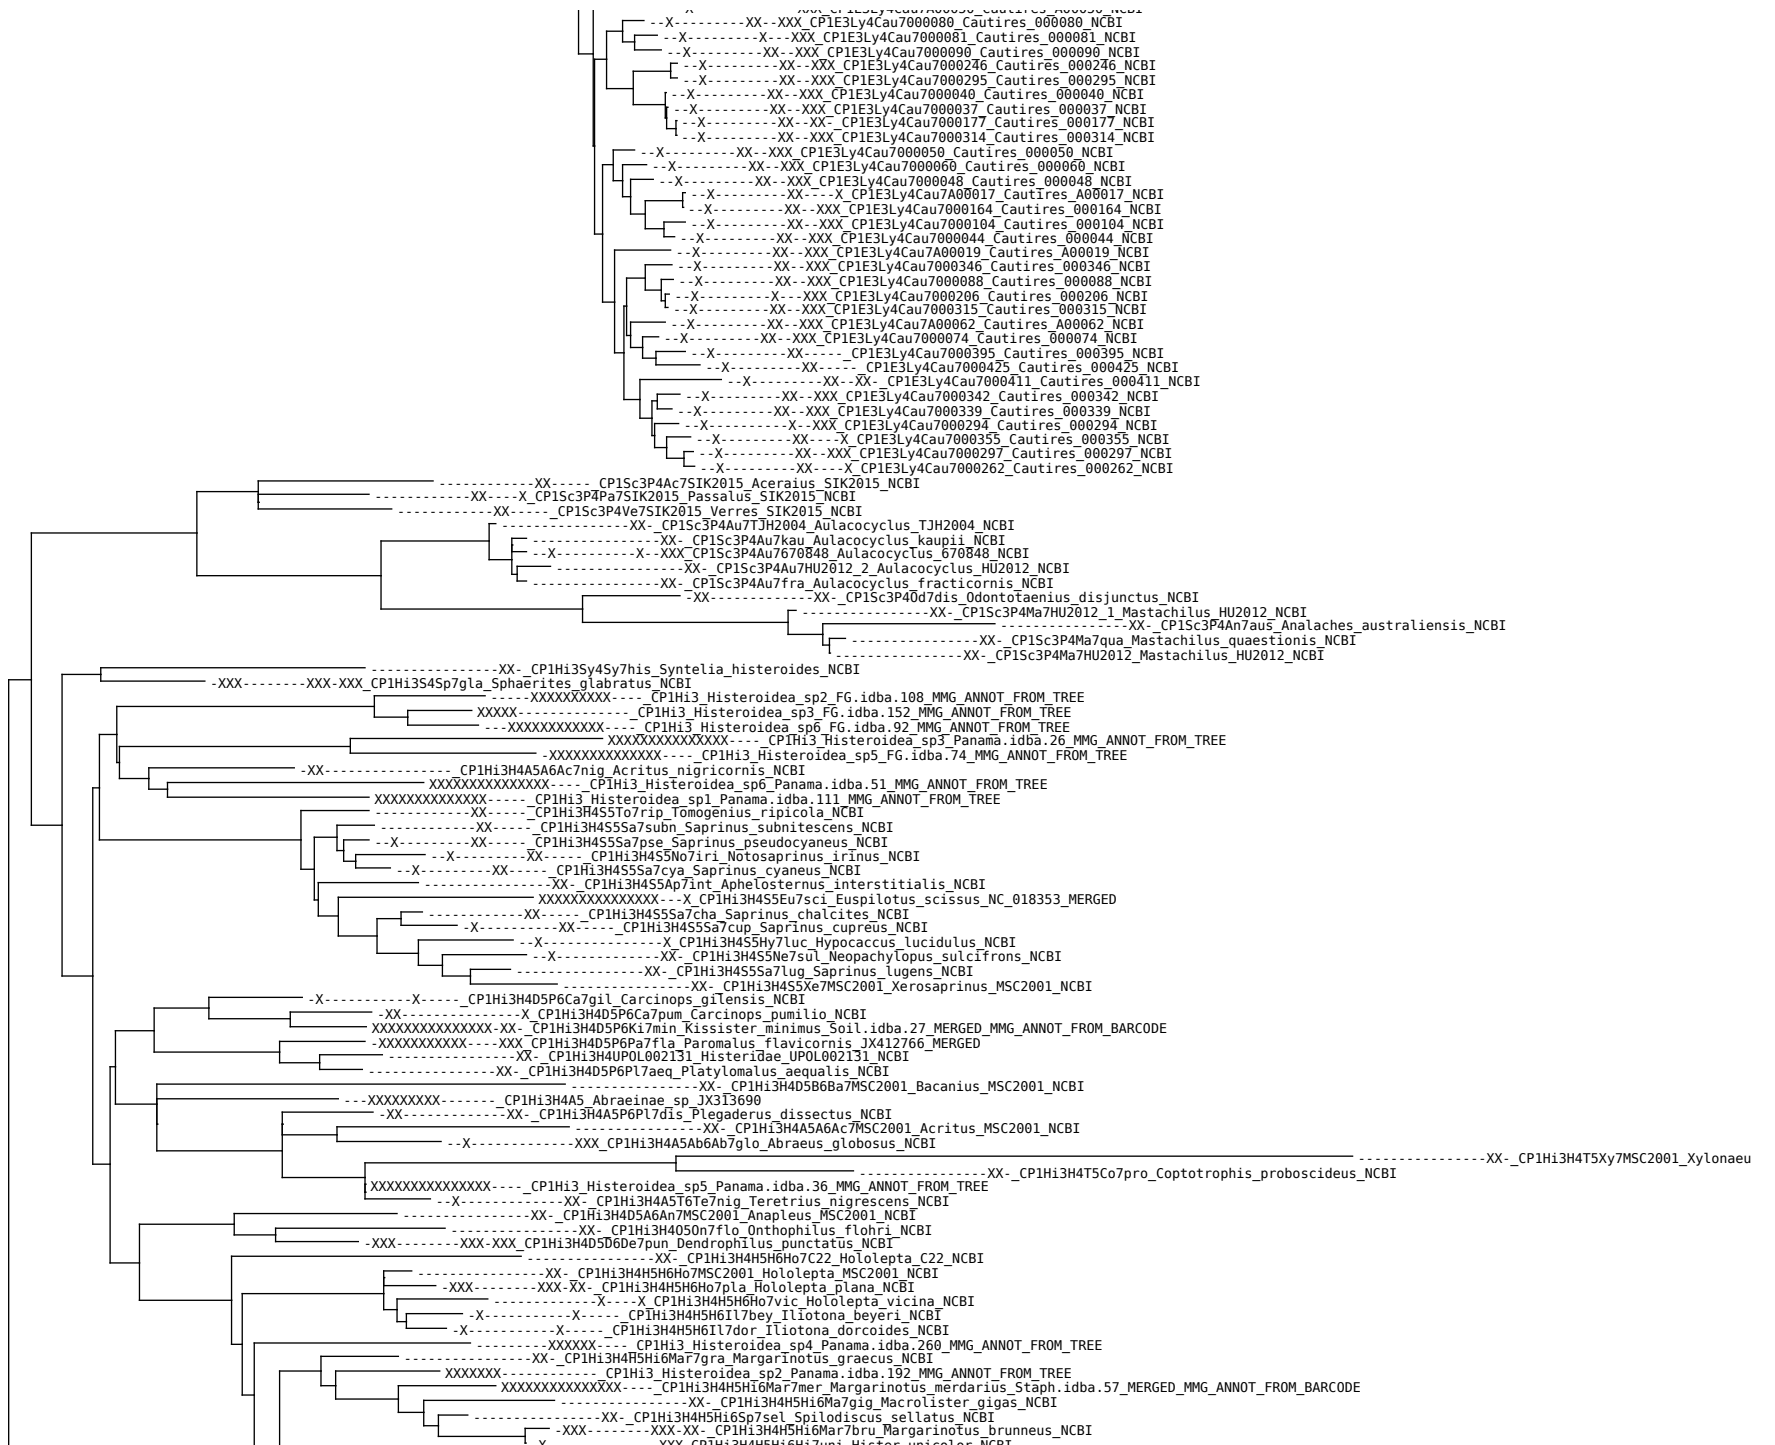

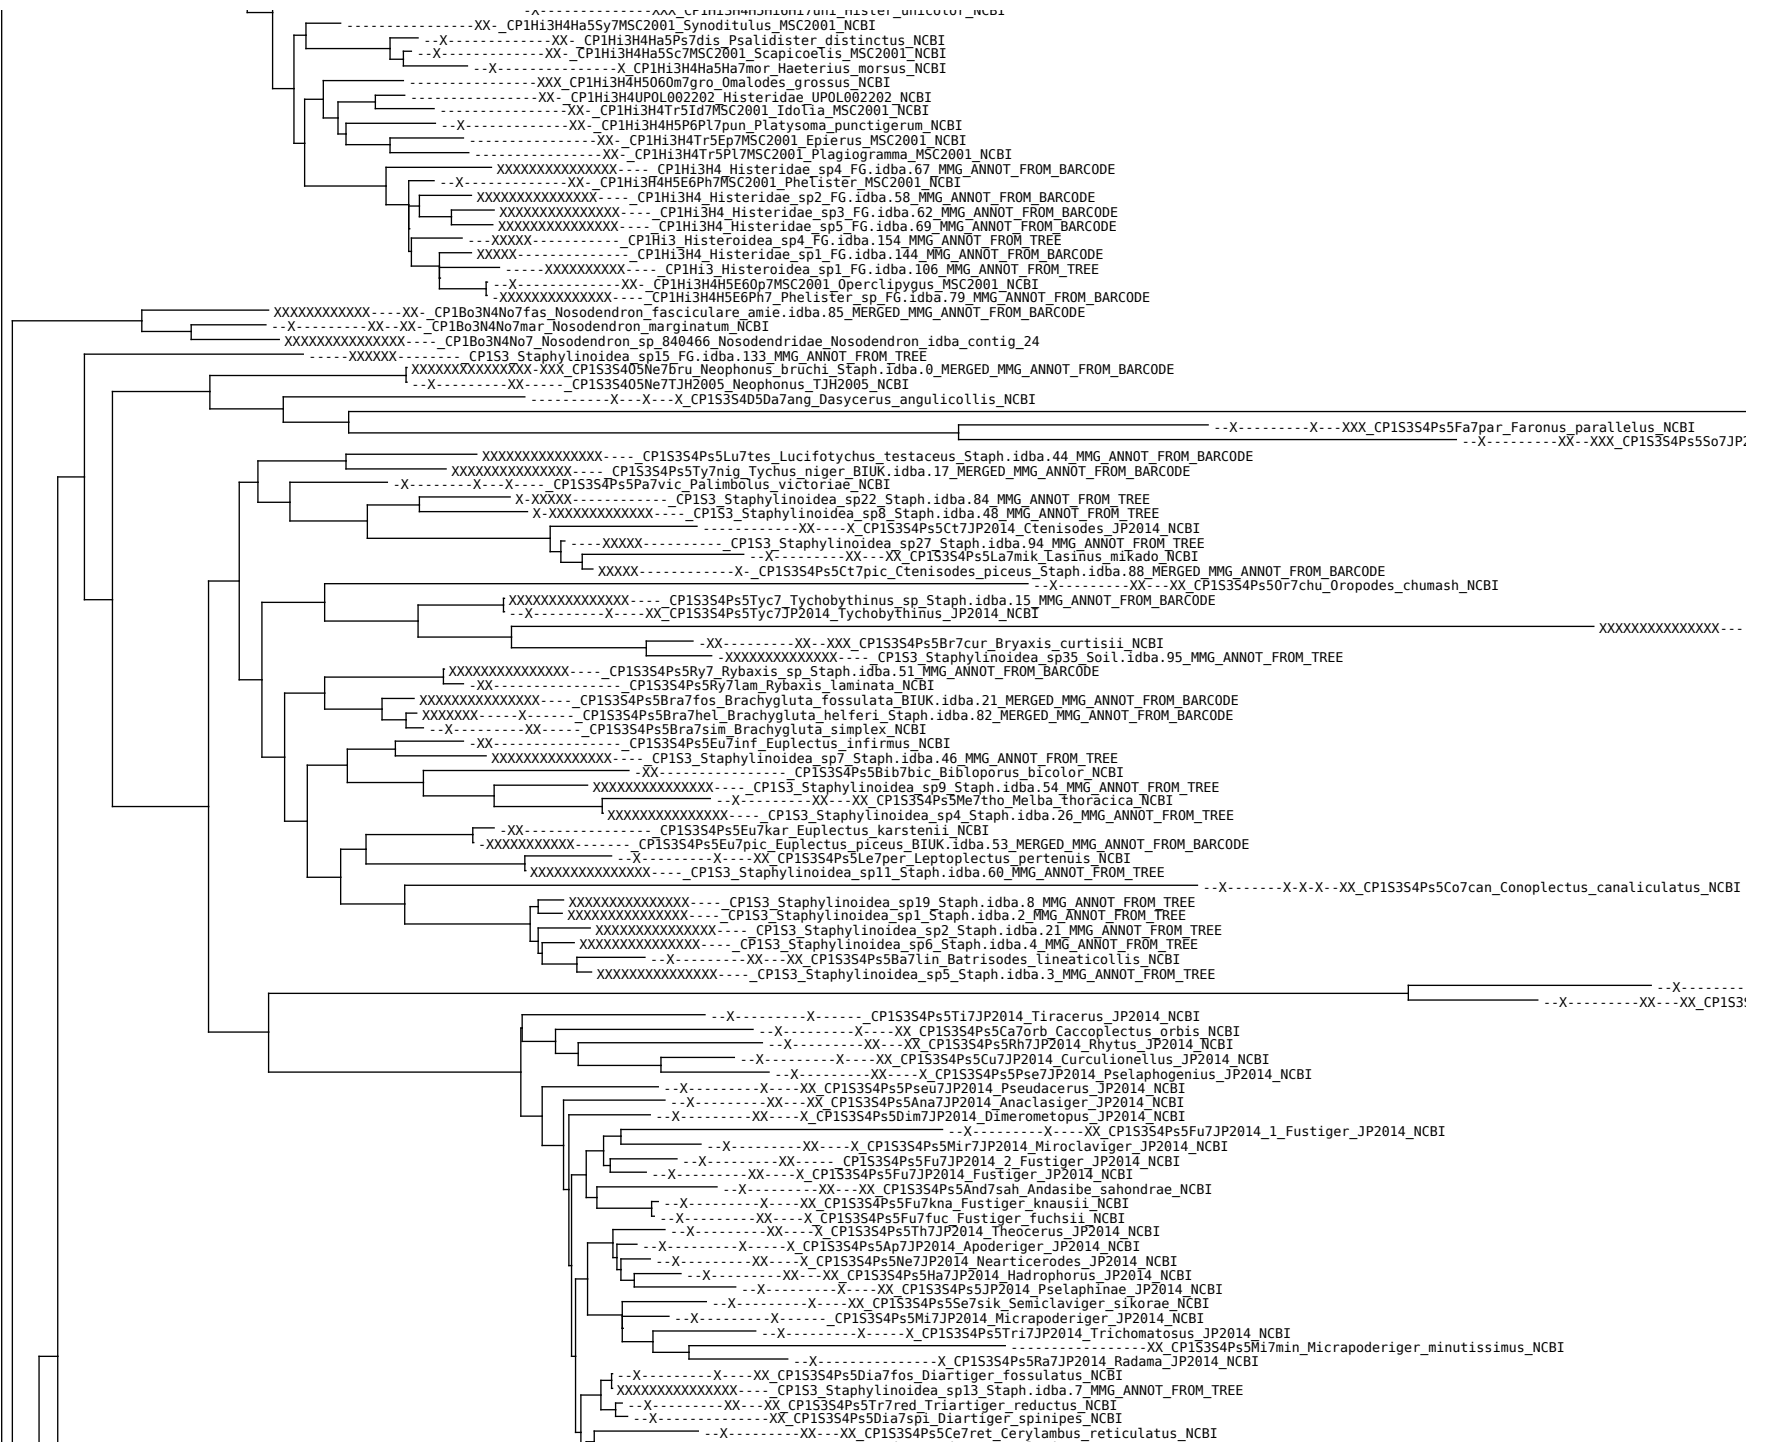

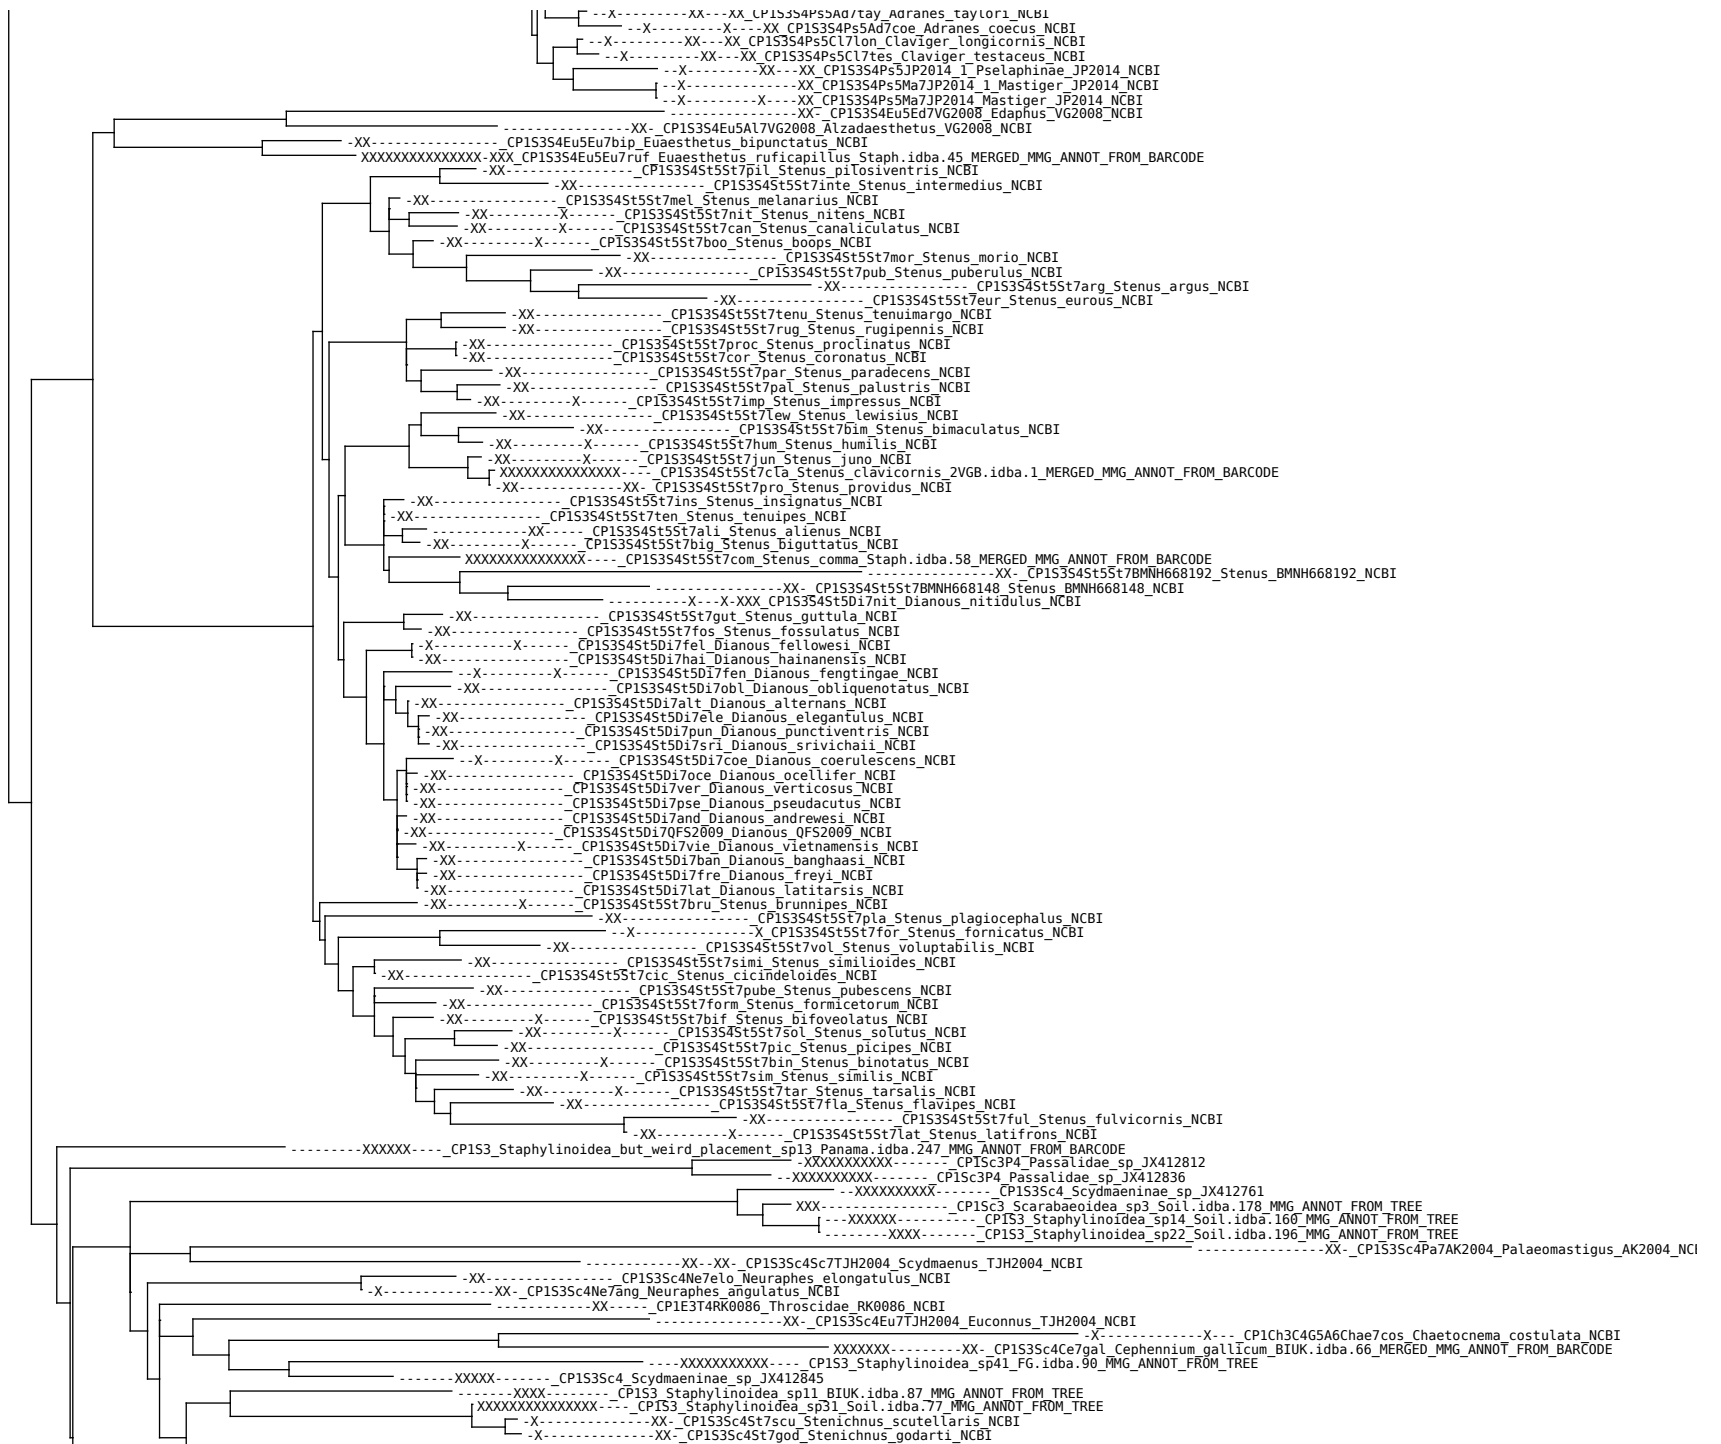

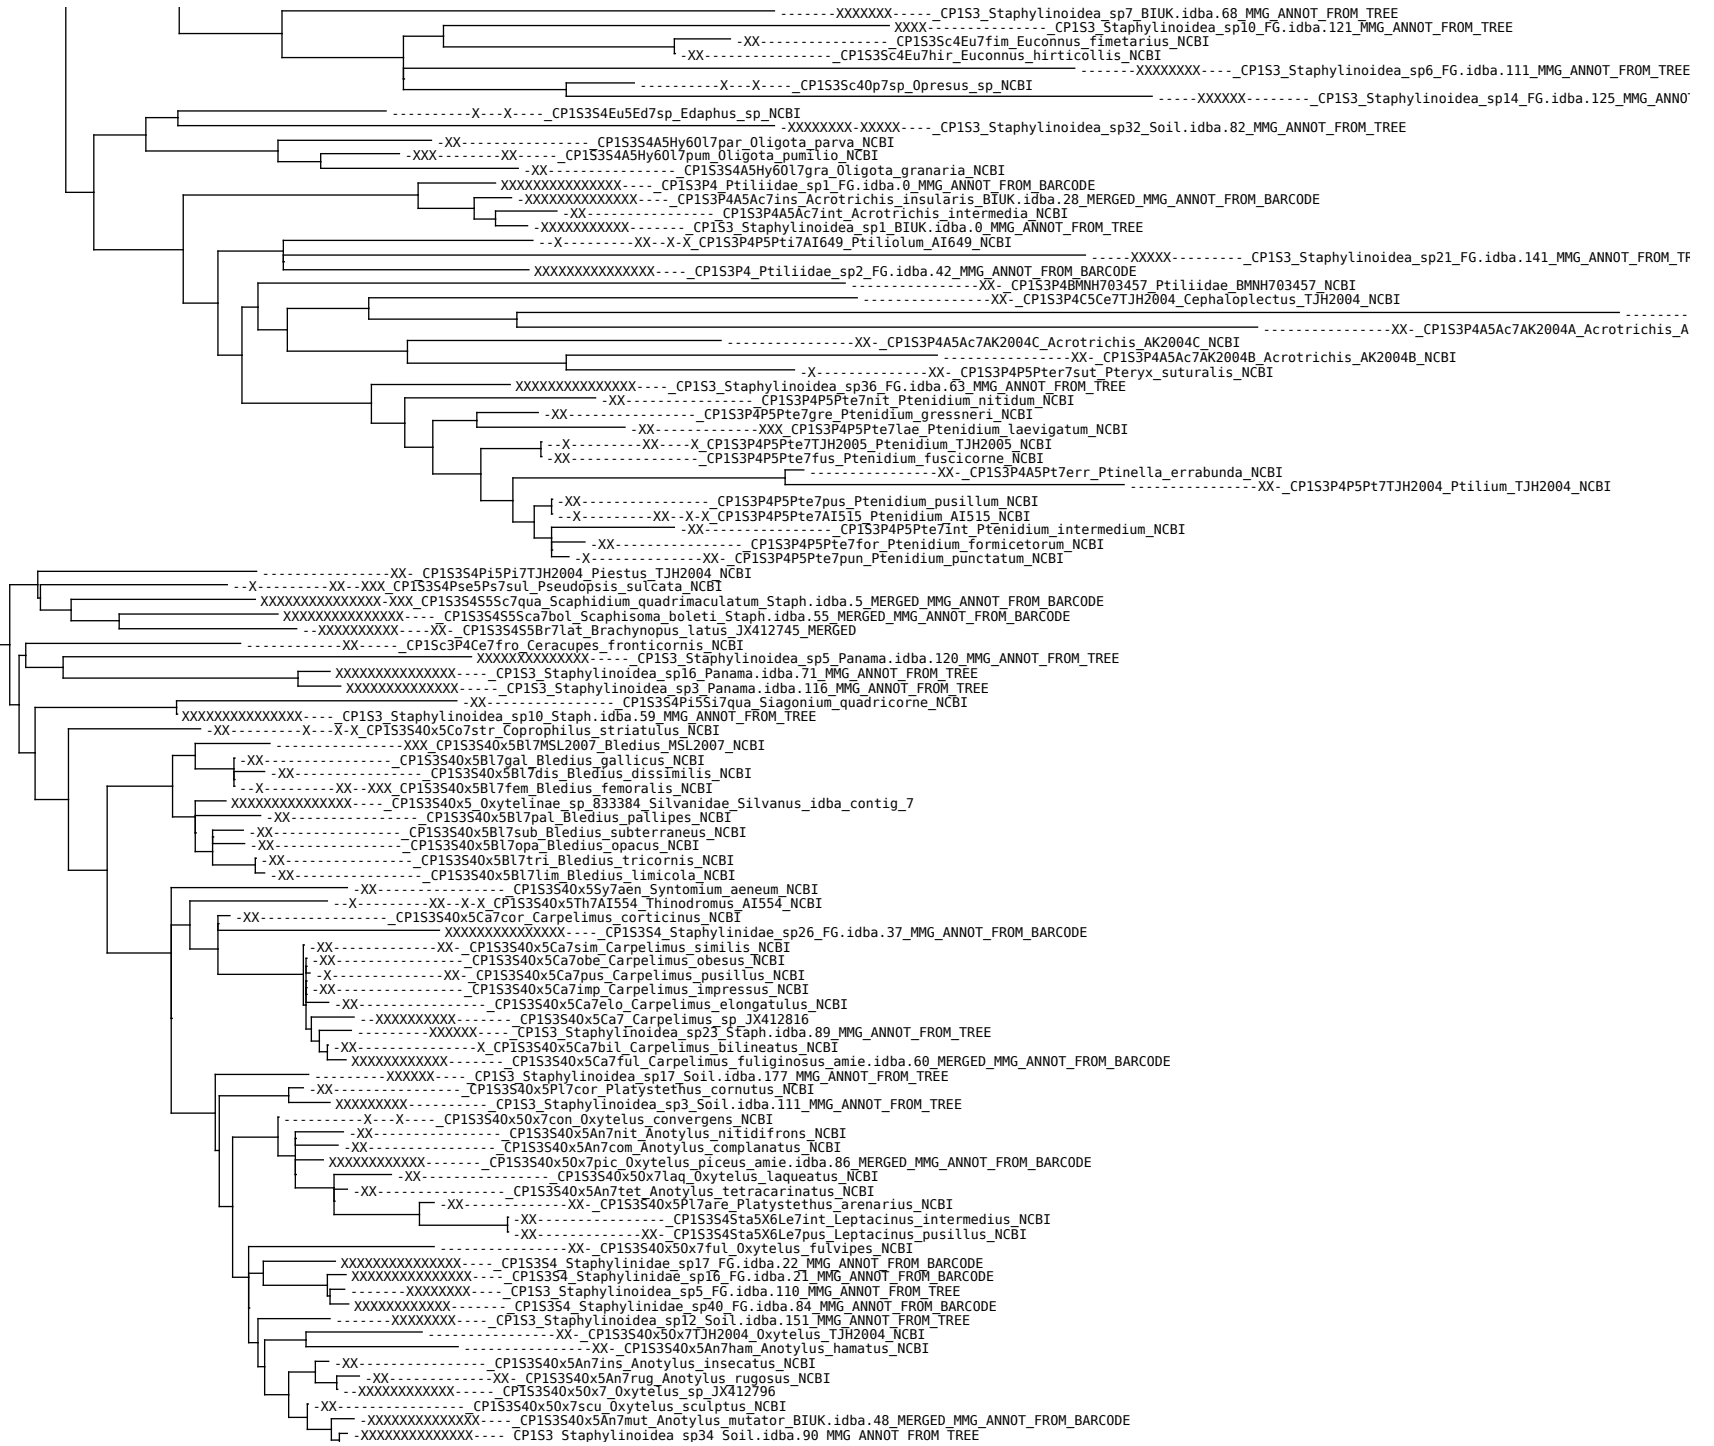

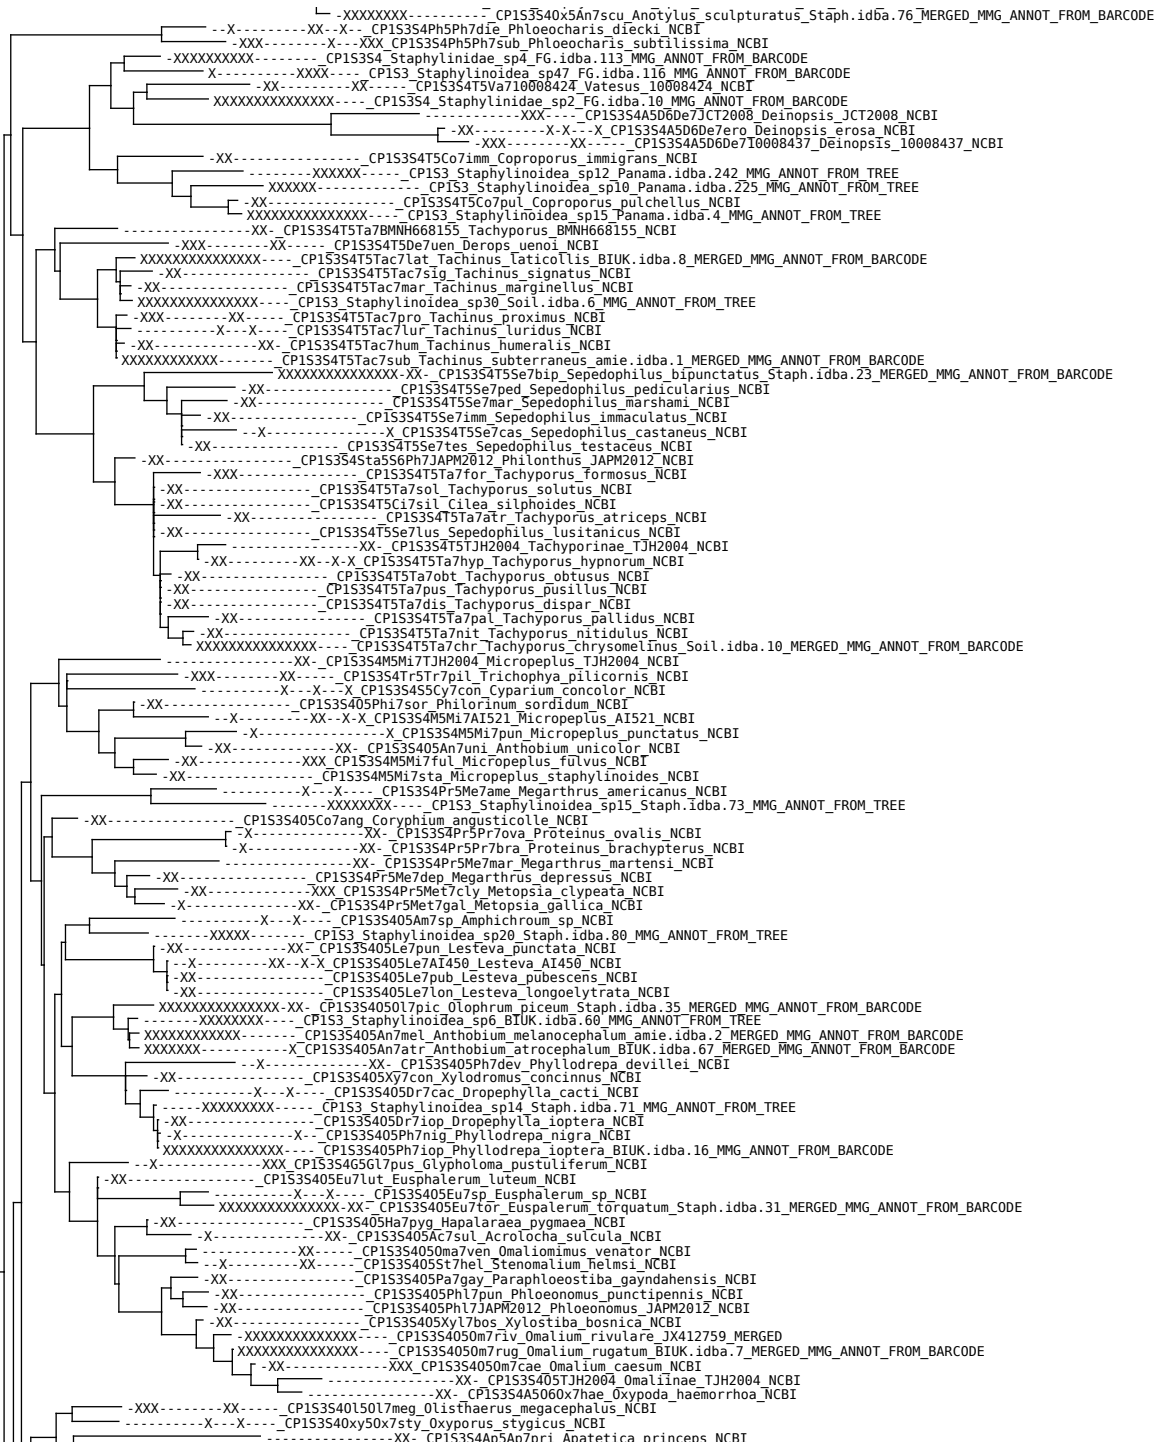



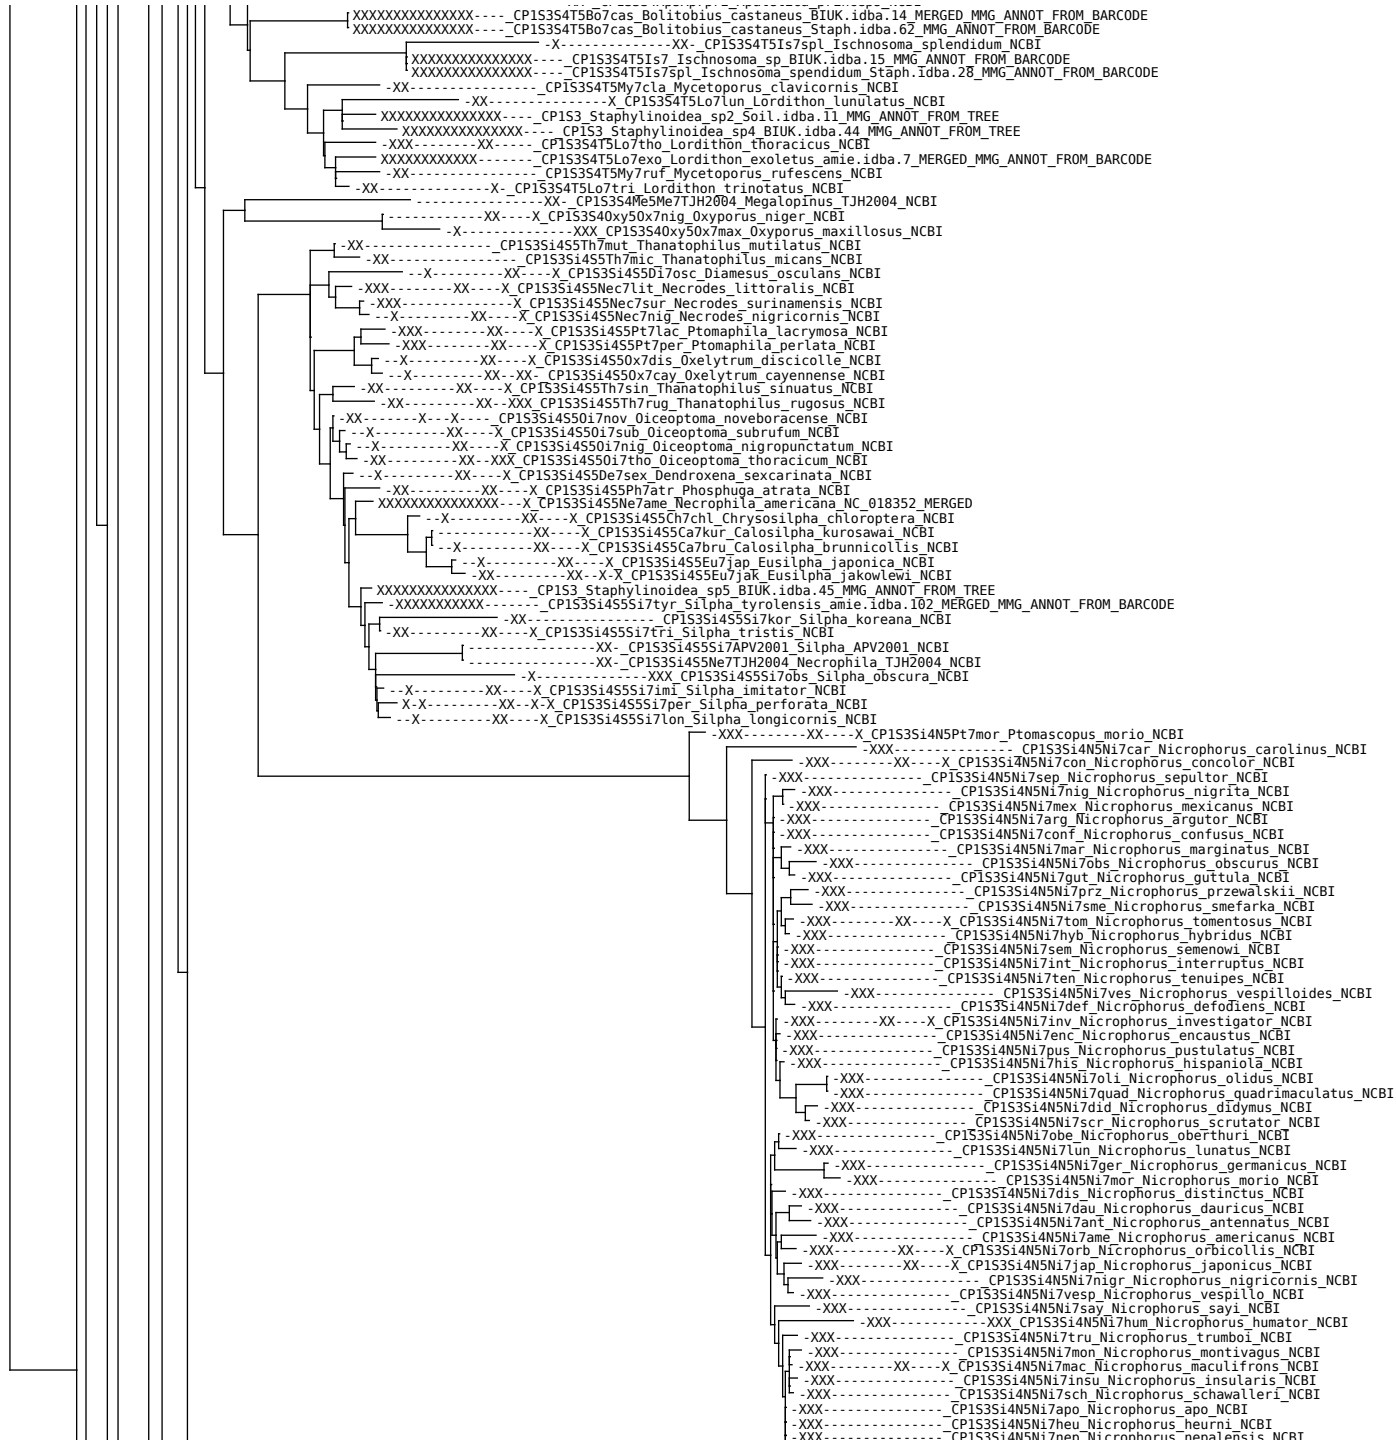

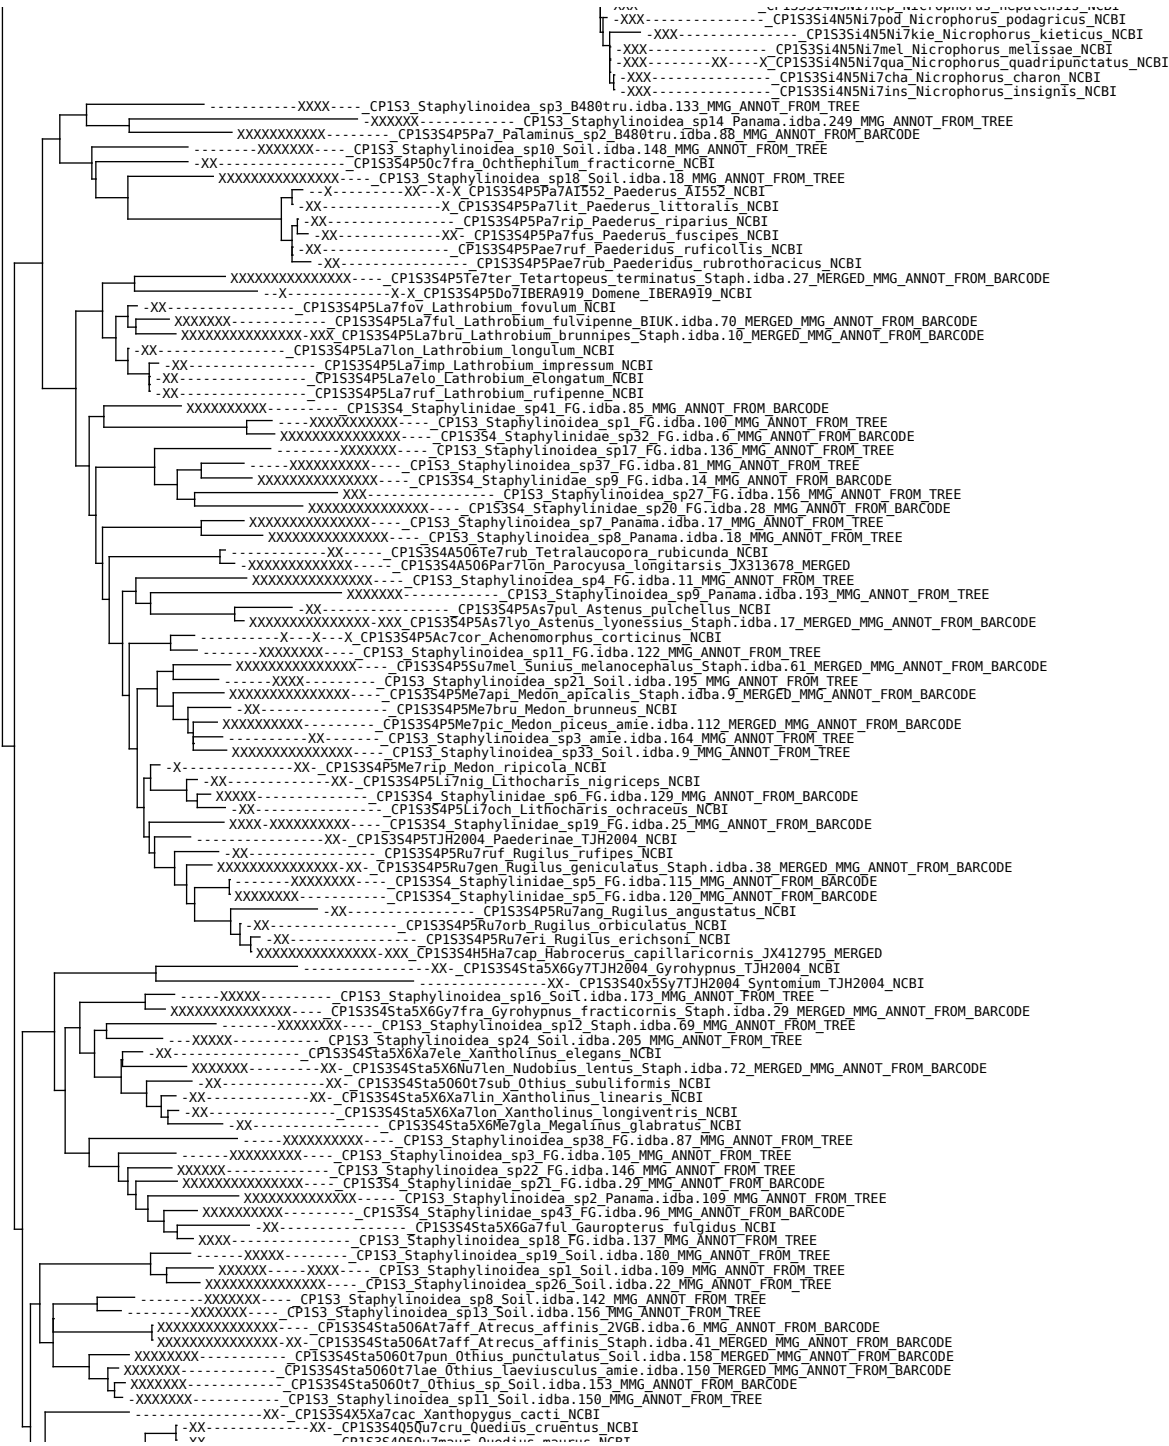

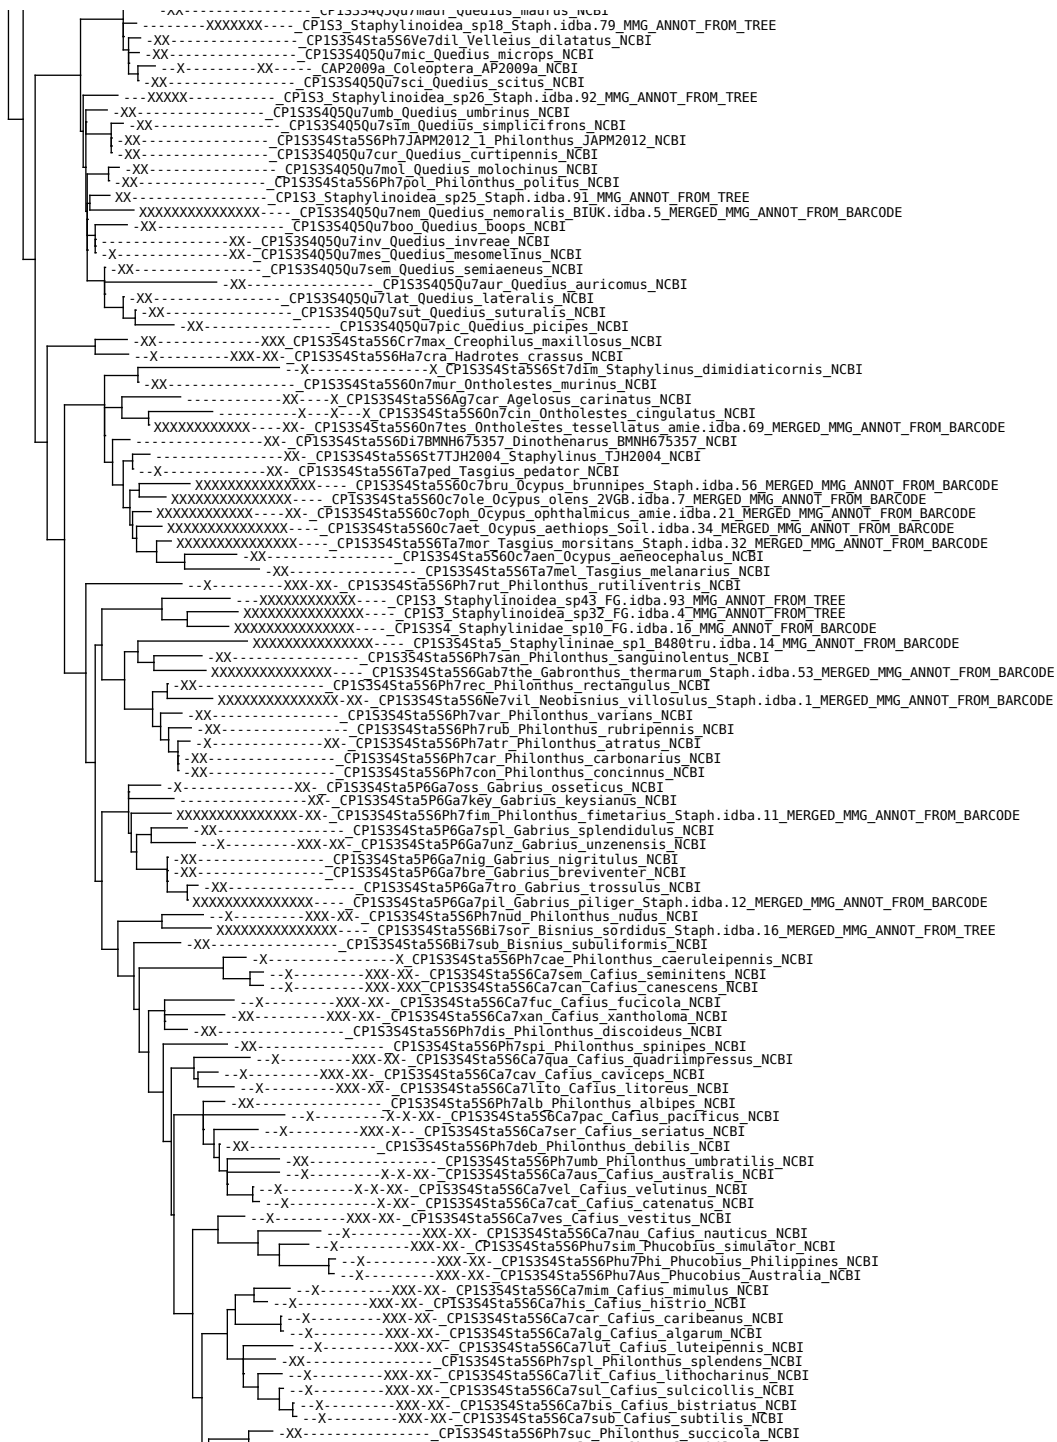

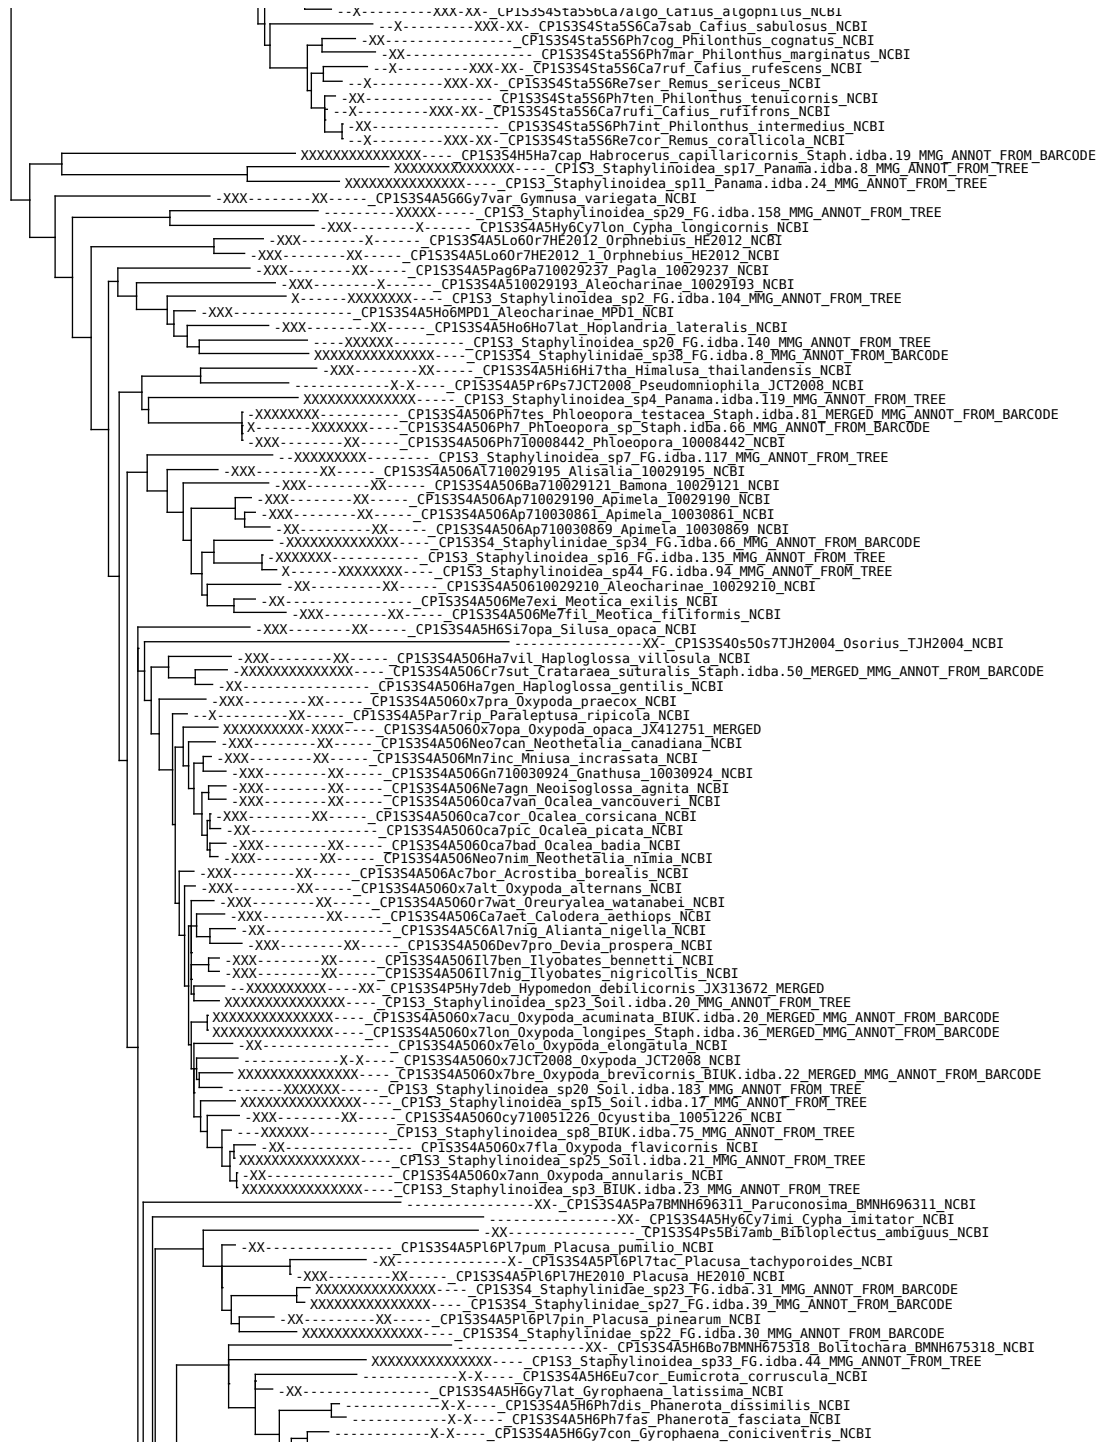

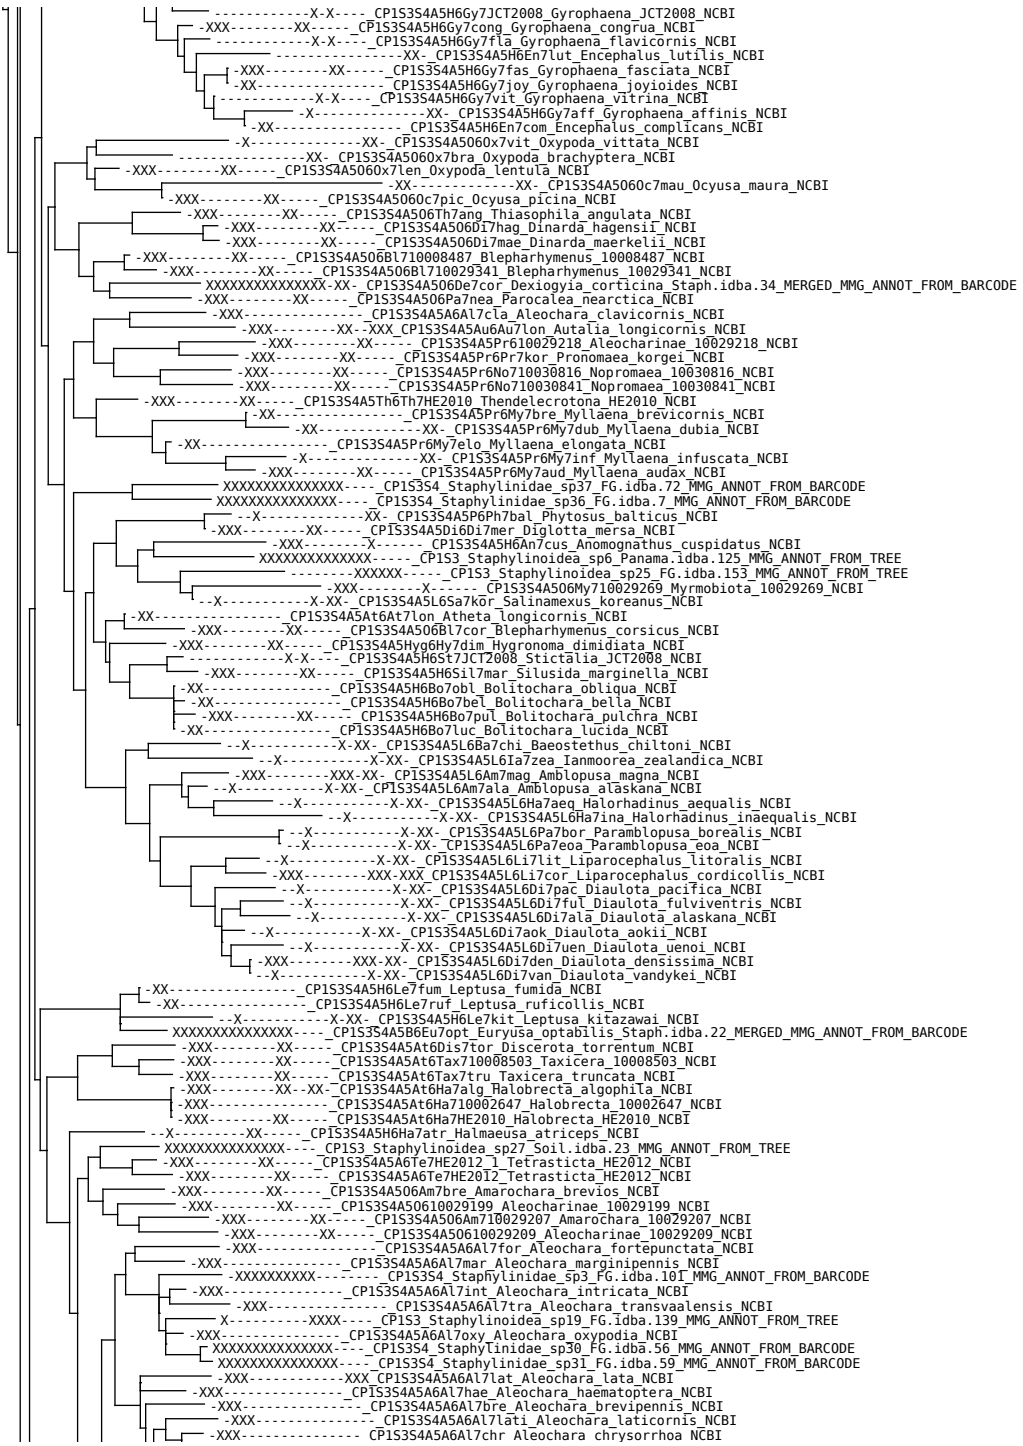

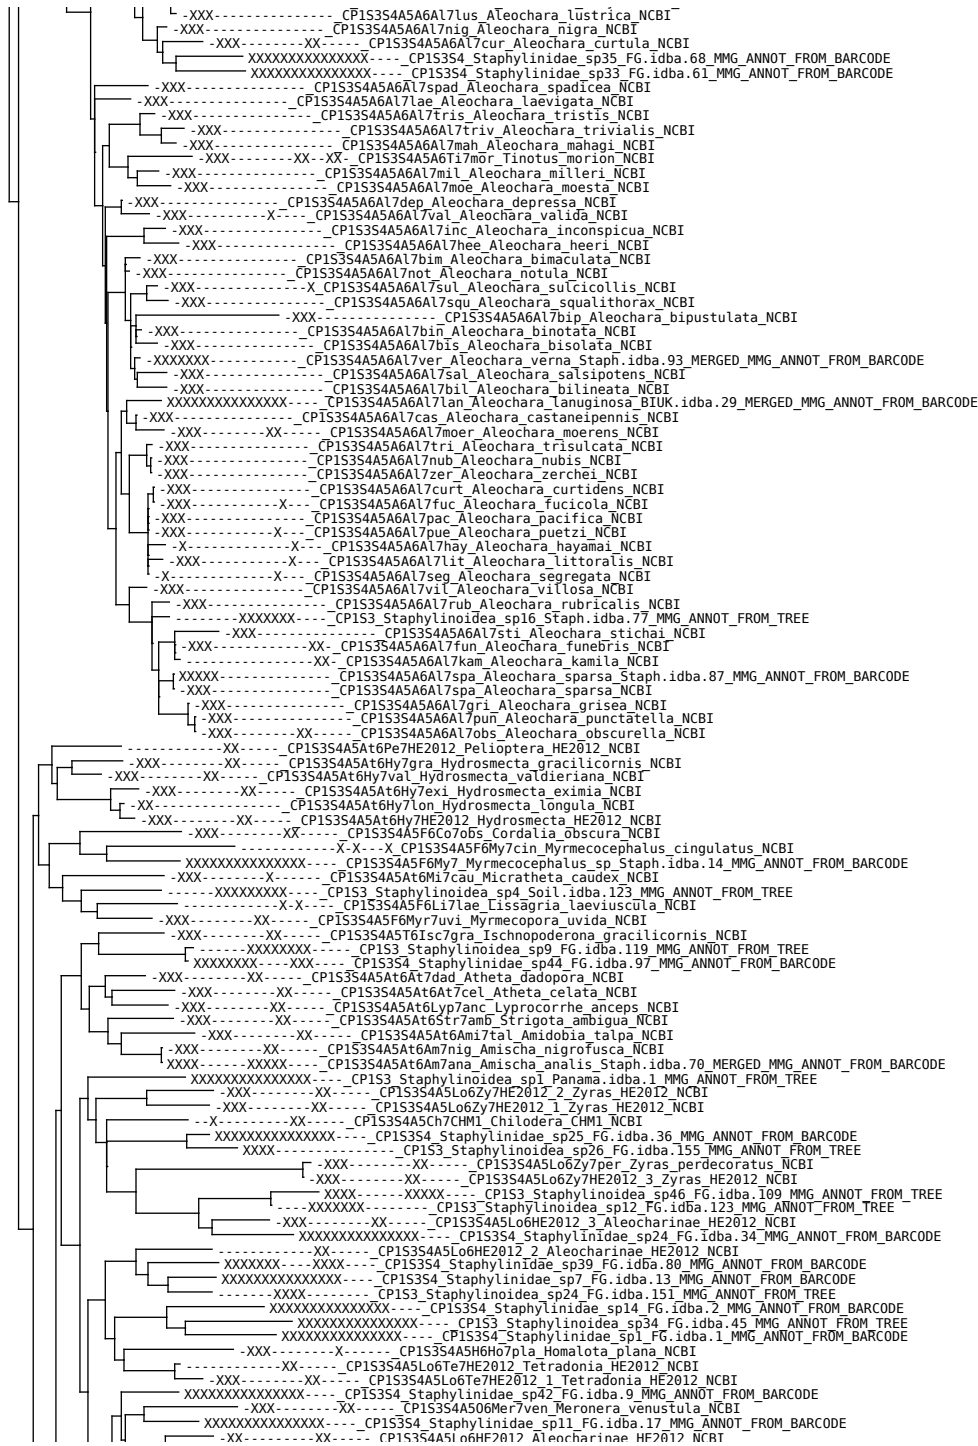

Phylogenetic tree showing relationships between various species, with labels such as CP153545Lo6HE2012\_1\_Aleocharinae\_HE2012\_NCBI, CP15354 Staphylinidae\_sp15\_FG.idba.19\_MMG\_ANNOT\_FROM\_BARCODE, and CP153545Lo6Eci7HE2012\_Ecitolonia\_HE2012\_NCBI. The tree is rooted on the left and branches out to the right, with species names listed next to the branches. Some labels include accession numbers and identifiers like 'HE2012' or 'JAPM2012'. The tree is a cladogram with bootstrap values indicated by 'X' marks at the nodes.

XXXXXXXXXXXXXXXXX CP153 Staphyloidea\_sp2 BIUK.idba.10 MMG\_ANNOT\_FROM\_TREE  
-XXX-XX- CP153S4A5At6Mo7sco Mocyta scopula NCBI  
XXXXXXXXXXXXXXXXX CP153S4A5At6At7fun Atheta fungi Soil.idba.12 MERGED\_MMG\_ANNOT\_FROM\_BARCODE  
XXXXXXXXXXXXXXXXX CP153 Staphyloidea\_sp7 Soil.idba.14 MMG\_ANNOT\_FROM\_TREE  
-XXX- CP153S4A5At6Mo7 Mocyta\_sp BIUK.idba.62 MMG\_ANNOT\_FROM\_BARCODE  
-XXX-XXXXXXXX CP153S4A5At6Mo7fun Mocyta\_fungi BIUK.idba.80 MERGED\_MMG\_ANNOT\_FROM\_BARCODE  
-XX- CP153S4A5At6At7elo Atheta elongatula NCBI  
-XXX-XX- CP153S4A5At6At7cin Atheta cinnamoptera NCBI  
-XXX-XX- CP153S4A5At6At7aen Atheta aeneipennis NCBI  
-XXX-XX- CP153S4A5At6Bo7hyp Boreophilina hyperborea NCBI  
-XXX-XX- CP153S4A5At6At7mem Atheta membranata NCBI  
-XX-XX-XX- CP153S4A5At6At7koc Atheta kochi NCBI  
-XXX-XX- CP153S4A5At6At7HE2010 Atheta HE2010 NCBI  
-XX- CP153S4A5At6At7ben Atheta benicKiella NCBI  
XXXXXXXXXXXXXXXXX CP153S4A5At6At7ami Atheta amacula Staph.idba.42 MERGED\_MMG\_ANNOT\_FROM\_BARCODE  
-XXX-XX- CP153S4A5At6At7pas Atheta pasadenae NCBI  
-XXX-XX- CP153S4A5At6At7per Atheta pervagata NCBI  
XXXXXXXXXXXXXXXXX CP153S4 Staphyloidea\_sp28 FG.idba.41 MMG\_ANNOT\_FROM\_BARCODE  
-XXX-XX- CP153S4A5Lo6Zy7col Zyrras collaris NCBI  
-XXX- CP153S4A5Lo6Zy7haw Zyrras haworthi NCBI  
-XXX-XX- CP153S4A5At6At7mod Atheta modesta NCBI  
-XXX-XX- CP153S4A5At6At7cra Atheta crassicornis NCBI  
-XXX-XX- CP153S4A5At6At7sub Atheta subtilis NCBI  
-XX- CP153S4A5At6At7mar Atheta marcida NCBI  
-XXX-XX- CP153S4A5At6Ly7lat Lypoglossa lateralis NCBI  
-XX- CP153S4A5At6At7lae Atheta laevana NCBI  
XXXXXXXXXXXXXXXXX CP153S4A5At6At7gag Atheta gagatina Staph.idba.20 MERGED\_MMG\_ANNOT\_FROM\_BARCODE  
-XXX- CP153S4A5At6T7cin Thamiaraea cinnamomea NCBI  
-XXX-XX- CP153S4A5At6T7ame Thamiaraea americana NCBI  
-XXX- CP153S4A5At6T7amri Thamiaraea brittoni NCBI  
-XXX-XX- CP153S4A5At6At7JCT2008 Atheta JCT2008 NCBI  
-XXX-XX- CP153S4A5At6To7orn Tomoglossa ornatella NCBI  
-XXX-XX- CP153S4A5At6Dad7imm Dadobia immersa NCBI  
-XXX-XX- CP153S4A5C6Ac7HE2012 Actocharina HE2012 NCBI  
-XXX-XX- CP153S4A5At6Da7cor Dalotia coriaria NCBI  
XXXXXXXXXXXXXXXXX CP153S4A5At6At7hyp Atheta hypnorum BIUK.idba.4 MERGED\_MMG\_ANNOT\_FROM\_BARCODE  
-XXX-XX- CP153S4A5At6At7gra Atheta graminicola NCBI  
-XXX-XX- CP153S4A5At6At7con Atheta contristata NCBI  
XXXXXXXXXXXXXXXXX CP153S4A5At6At7cas Atheta castanoptera BIUK.idba.6 MERGED\_MMG\_ANNOT\_FROM\_BARCODE  
-XXX-XX- CP153S4A5At6Bo7HE2010 Boreostiba HE2010 NCBI  
-XXX-XX- CP153S4A5At6At7set Atheta setigera NCBI  
-XXX-XX-XX- CP153S4A5At6D17aeq Dinaraea aequata NCBI  
-XXX-XX- CP153S4A5At6Alp7HE2010 Alpinia HE2010 NCBI  
-XXX-XX- CP153S4A5At6Alp7HE2012 Alpinia HE2012 NCBI  
-XX- CP153S4A5At6Li7lon Liogluta longiuscula NCBI  
XXXXXXXXXXXXXXXXX CP153S4A5At6Li7mic Liogluta longiuscula BIUK.idba.24 MERGED\_MMG\_ANNOT\_FROM\_BARCODE  
XXXXXXXXXXXXXXXXX CP153S4A5At6L17mic Liogluta microptera Staph.idba.33 MMG\_ANNOT\_FROM\_BARCODE  
-XXX-XX-XX- CP153S4A5At6At7ves Atheta vestita NCBI  
-XX- CP153S4A5At6At7bos Atheta bosnica NCBI  
-XX- CP153S4A5At6At7mig Atheta nigripes NCBI  
-XX- CP153S4A5At6Al7lins Aloconota insecta NCBI  
-XX- CP153S4A5At6At7obl Atheta oblita NCBI  
-XXX-XX- CP153S4A5At6Ph7deb Philhygra debilis NCBI  
-XX-XX- CP153S4A5At6Am7dec Amischa decipiens NCBI  
-XXX-XX- CP153S4A5At6Ph7ite Philhygra iterans NCBI  
XXXXXXXXXXXXXXXXX CP153S4A5At6At7vol Atheta volans Staph.idba.63 MERGED\_MMG\_ANNOT\_FROM\_BARCODE  
XXXXXXXXXXXXXXXXX CP153S4A5At6At7 Atheta\_sp BIUK.idba.9 MMG\_ANNOT\_FROM\_BARCODE  
-XXX-XX- CP153S4A5At6At7vag Atheta vaga NCBI  
XXXXXXXXXXXXXXXXX CP153S4A5At6At7fung Atheta\_fungi Ivoara Staph.idba.37 MERGED\_MMG\_ANNOT\_FROM\_BARCODE  
-XX- CP153S4A5At6At7cor Atheta corvina NCBI  
-XX-XX- CP153S4A5At6At7rav Atheta ravilla NCBI  
-XX- CP153S4A5At6At7hyg Atheta hygropoora NCBI  
-XXX-XX- CP153S4A5At6Ph7fal Philhygra fallaciosa NCBI  
-XXX-XX- CP153S4A5C6Br7mer Brundinia meridionalis NCBI  
-XXX-XXXX- CP153S4A5C6Br7 Brundinia\_sp Staph.idba.67 MMG\_ANNOT\_FROM\_BARCODE  
-XXX-XX- CP153S4A5At6Hy7HE2010 Hydrosmeeta HE2010 NCBI  
-XXX-XX- CP153S4A5At6At7lati Atheta laticeps NCBI  
-XXX-XX- CP153S4A5At6At7vil Atheta vilis NCBI  
-XXXX- CP153 Staphyloidea\_sp24 Staph.idba.90 MMG\_ANNOT\_FROM\_TREE  
-XXXX- CP153 Staphyloidea\_sp21 Staph.idba.83 MMG\_ANNOT\_FROM\_TREE  
-XXX-XX- CP153S4A5At6At7pal Atheta pallidicornis NCBI  
-XXX-XX- CP153S4A5At6At7kla Atheta klagesi NCBI  
-XXX-XX- CP153S4A5T6Ta7JCT2008 Tachyusa JCT2008 NCBI  
-XXX-XX- CP153S4A5T6Gn7cae Gnypeta caerulea NCBI  
-X-XX- CP153S4A5T6Gn7car Gnypeta carbonaria NCBI  
-XXX-XX- CP153S4A5T6Br7con Brachyusa concolor NCBI  
-XX- CP153S4A5A6Al7JH2004 Aleochara JH2004 NCBI  
XXXXXXXXXXXXXXXXX CP153S4A5T6Da7fal Dacri-la fallax Staph.idba.43 MERGED\_MMG\_ANNOT\_FROM\_BARCODE  
XXXXXXXXXXXXXXXXX CP153S4A5T6Th7atr Thinonoma atra Staph.idba.40 MERGED\_MMG\_ANNOT\_FROM\_BARCODE  
-XXX-XX- CP153S4A5T6Gn7I0029189 Gnypeta\_10029189 NCBI  
-XXX-XX- CP153S4A5T6Gn7I0029194 Gnypeta\_10029194 NCBI  
-XX-XX- CP153S4A5At6At7lit Atheta liturata NCBI  
-XXX-XX- CP153S4A5T6Pa7den Paradilacra densissima NCBI  
-XXX-XX- CP153S4A5T6I0029142 Aleocharinae\_10029142 NCBI  
-XXX-XX- CP153S4A5T6Ta7gem Tachyusa gemma NCBI  
-XXX-XX- CP153S4A5T6Is7obj Ischnopoda objecta NCBI  
-X-XXXXXXXX- CP153A4Ap7tah Apteroloma tahoecum NCBI  
XXXXXXXXXXXXXXXX- CP153L4L5Tr7mae Triarthron maerkelii amie.idba.15 MERGED\_MMG\_ANNOT\_FROM\_BARCODE  
-X-XX- CP153L4C5Ne7sp Neopelatosp\_sp NCBI  
-X-XX- CP153A4Ne7hyd Necrophilus hydrophiloides NCBI  
-XXX- CP153 Staphyloidea\_sp2 amie.idba.148 MMG\_ANNOT\_FROM\_TREE  
-XX- CP153L4L5Le7pol Leiodes politus NCBI  
-XXX- CP153L4L5Le7pic Leiodes picea amie.idba.151 MERGED\_MMG\_ANNOT\_FROM\_BARCODE  
-XXXX- CP153 Staphyloidea\_sp BIUK.idba.65 MMG\_ANNOT\_FROM\_TREE  
-XXXX- CP153L4 Leiodesidae\_sp2 FG.idba.142 MMG\_ANNOT\_FROM\_BARCODE  
-XXXX- CP153 Staphyloidea\_sp30 FG.idba.23 MMG\_ANNOT\_FROM\_TREE  
-XXXX- CP153L4 Leiodesidae\_sp1 FG.idba.112 MMG\_ANNOT\_FROM\_BARCODE  
-XXXX- CP153 Staphyloidea\_sp13 FG.idba.133 MMG\_ANNOT\_FROM\_TREE



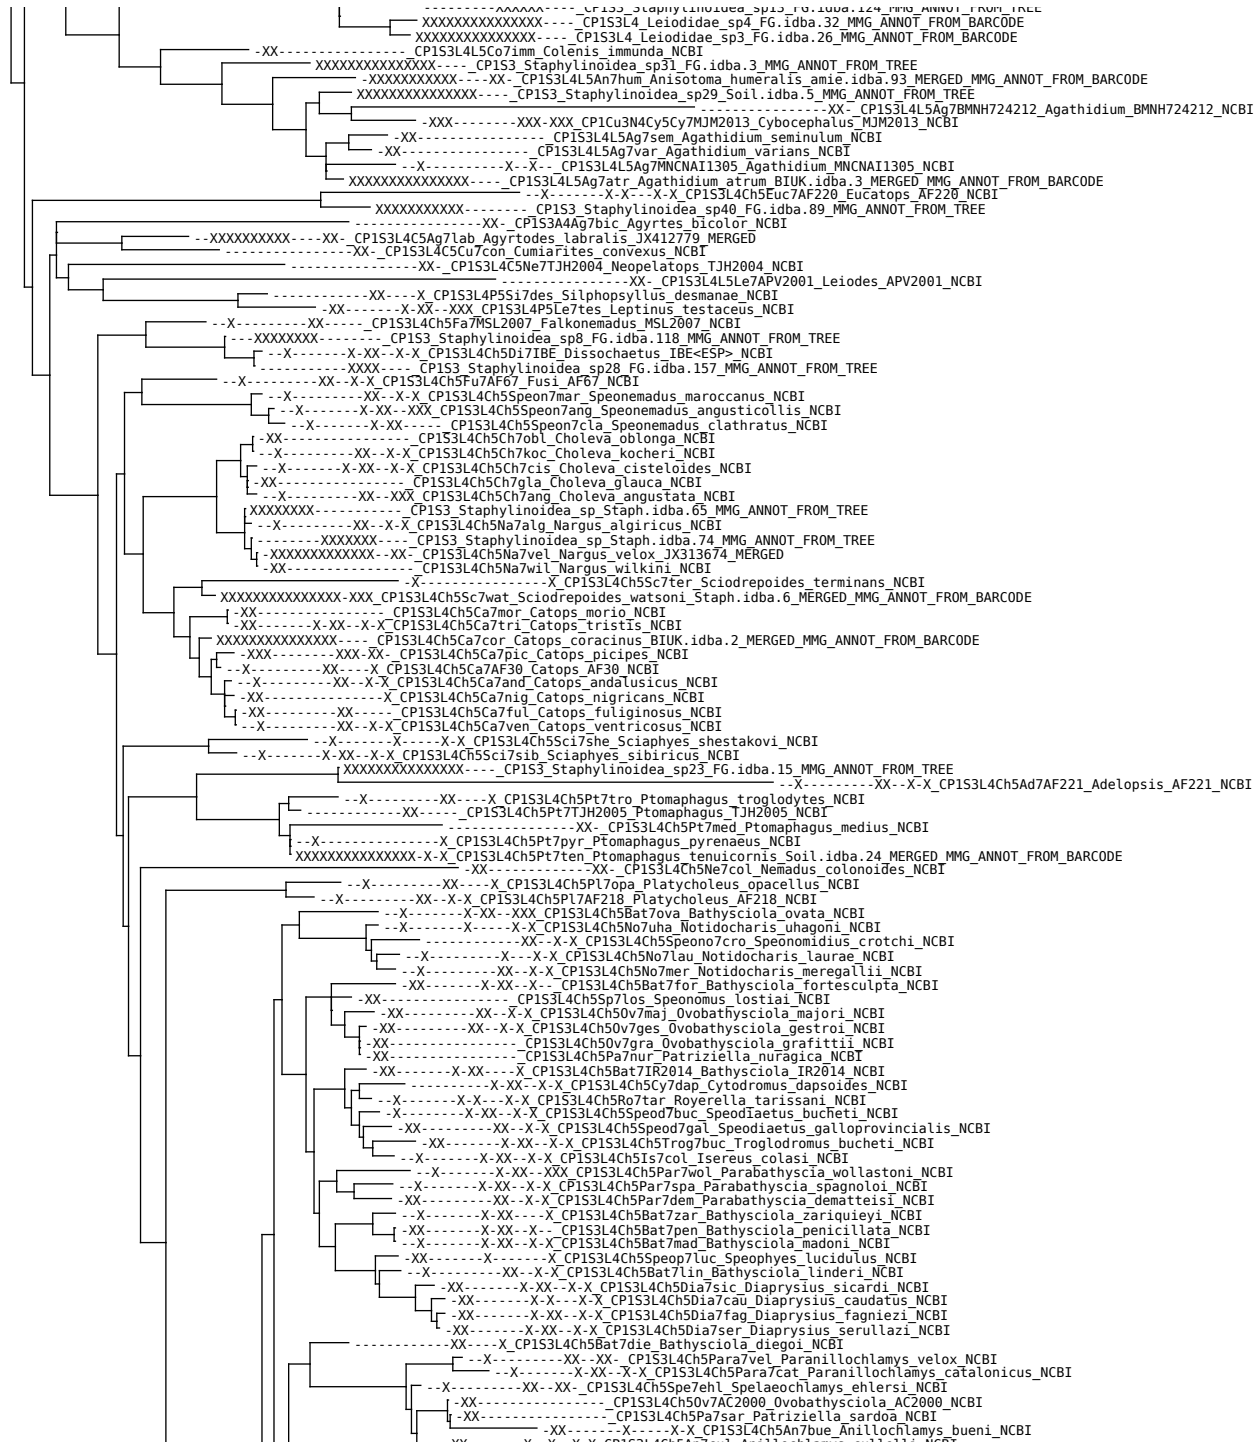

Phylogenetic tree showing relationships among various species, with bootstrap values indicated by 'X' marks. The tree is rooted on the left and branches out to the right. Species names are listed on the right side of the tree, often followed by 'NCBI'. Some species names are truncated. Bootstrap values are represented by 'X' marks of varying lengths and positions along the branches. Some nodes are marked with 'XXXXXX' or 'XXXXXXXXXXXXXXXXXX'. The tree shows a complex branching pattern, with many species having high bootstrap support (indicated by multiple 'X's).

Species names include: CP153L4Ch5An7cul, Anillochlamys\_cultelli, Anillochlamys\_subtruncatus, CP153L4Ch5An7aur, Anillochlamys\_aurouxii, CP153L4Ch5An7mor, Anillochlamys\_moroderi, CP153L4Ch5Leo7ber, Leonesiella\_bergidi, CP153L4Ch5Ou7pac, Quaestus\_pachecoi, CP153L4Ch5Ou7jea, Quaestus\_jeannei, CP153L4Ch5Ou7ami, Quaestus\_amicalis, CP153L4Ch5Ou7arc, Quaestus\_arcanus, CP153L4Ch5Or7jas, Oresigenus\_jaspei, CP153L4Ch5Ou7adn, Quaestus\_adnexus, CP153L4Ch5Ou7aur, Quaestus\_aummalis, CP153L4Ch5Br7etri, Breuilia\_triaugulum, CP153L4Ch5Br7elo, Breuiliites\_elyoi, CP153L4Ch5Es7luq, Espanoliella\_luquei, CP153L4Ch5Ou7sha, Quaestus\_sharpi, CP153L4Ch5Ou7esc, Quaestus\_escalerai, CP153L4Ch5Es7cun, Espanoliella\_cuneus, CP153L4Ch5Es7jea, Espanoliella\_jeanneli, Staph.idba.86\_MERGED\_MMG\_ANNOT\_FROM\_BARCODE, CP153L4Ch5Es7urd, Espanoliella\_urdialensis, CP153L4Ch5Ou7nol, Quaestus\_noltei, CP153L4Ch5Ou7can, Quaestus\_cantabricus, CP153L4Ch5Ou7cic, Quaestus\_cisnerosi, CP153L4Ch5Ou7pas, Quaestus\_pasensis, CP153L4Ch5Fr7luc, Fresnedaelia\_lucius, CP153L4Ch5Can7cul, Cantabrogeus\_cultellus, CP153L4Ch5Can7ant, Cantabrogeus\_antimachus, CP153L4Ch5Can7luq, Cantabrogeus\_luquei, CP153L4Ch5Can7nad, Cantabrogeus\_nadali, CP153L4Ch5Can7fre, Cantabrogeus\_fresnedai, CP153L4Ch5Bathy7bys, Bathyscimorphus\_byssinus, CP153L4Ch5Parap7ser, Parapropus\_sericeus, CP153L4Ch5Bat7khe, Bathysciotes\_khevenhulleri, CP153L4Ch5As7ang, Astagobius\_astagobius, CP153L4Ch5Le7noc, Leptodirus\_hochenwarti, CP153L4Ch5Troc7mes, Trocharanis\_mestrei, CP153L4Ch5Ph7pro, Pholeuon\_proserpinae, CP153L4Ch5Ph7gra, Pholeuon\_gracile, CP153L4Ch5Bat7IR2014\_1, Bathysciola\_IR2014, CP153L4Ch5Bat7lar, Bathysciola\_larcennei, CP153L4Ch5Bat7con, Bathysciola\_convena, CP153L4Ch5Bat7liq, Bathysciola\_liqueana, CP153L4Ch5Bat7me, Bathysciola\_meridionalis, CP153L4Ch5Bat7asp, Bathysciola\_asperuta, CP153L4Ch5Bat7fin, Bathysciola\_finismillennii, CP153L4Ch5Naf7sor, Nafarroa\_sorogainensis, CP153L4Ch5Ar7Lei, Aranzadiella\_leizaola, CP153L4Ch5Speo7gal, Speocharidius\_galani, CP153L4Ch5Speo7bre, Speocharidius\_breuili, CP153L4Ch5Eu7ber, Euryspeonomus\_beruetei, CP153L4Ch5Jo7men, Josettekia\_mendizabali, CP153L4Ch5Eu7cia, Euryspeonomus\_ciaurrizi, CP153L4Ch5Eu7bre, Euryspeonomus\_breuilli, CP153L4Ch5Bat7sch, Bathysciola\_schiodtei, CP153L4Ch5Bat7mys, Bathysciola\_mystica, CP153L4Ch5Bat7par, Bathysciola\_parallela, CP153L4Ch5Bat7gra, Bathysciola\_grandis, CP153L4Ch5Bat7obe, Bathysciola\_obermaieri, CP153L4Ch5Bat7bre, Bathysciola\_breuili, CP153L4Ch5Sp7bru, Speonomus\_bruckii, CP153L4Ch5Sp7gau, Speonomus\_gaudini, CP153L4Ch5Sp7spe, Speonomus\_speluncarum, CP153L4Ch5Sp7IR2014, Speonomus\_IR2014, CP153L4Ch5Sp7alb, Speonomus\_alberti, CP153L4Ch5Sp7bas, Speonomus\_bastideus, CP153L4Ch5Sp7bou, Speonomus\_bourgoini, CP153L4Ch5Sp7org, Speonomus\_orgibetensis, CP153L4Ch5Bar7del, Baronniesia\_delioti, CP153L4Ch5Be7esp, Bellesia\_espalyoti, CP153L4Ch5Sp7inf, Speonomus\_infernus, CP153L4Ch5Pha7sio, Phacomorphus\_sioberi, CP153L4Ch5Pha7fra, Phacomorphus\_fratyi, Staph.idba.18\_MERGED\_MMG\_ANNOT\_FROM\_BARCODE, CP153L4Ch5Pha7ale, Phacomorphus\_atexinae, CP153L4Ch5Par7jea, Bathysciella\_jeanneli, CP153L4Ch5Par7de, Parvospeonomus\_delarouzei, CP153L4Ch5Par7can, Parvospeonomus\_pareillesi, CP153L4Ch5Ps7rah, Pseudospeonomus\_rahola, CP153L4Ch5Trogl7gav, Troglomyces\_gavoyi, CP153L4Ch5Trogl7lud, Troglomyces\_ludovici, CP153L4Ch5Pe7bof, Perriniella\_bofilli, CP153L4Ch5Ce7rib, Ceretophyes\_riberai, CP153L4Ch5Ce7cen, Ceretophyes\_cenarroi, CP153L4Ch5Ant7que, Antrocharis\_querilhaci, CP153L4Ch5Ge7del, Gesciella\_delioti, CP153L4Ch5Parat7car, Paratroglophyes\_carrerei, CP153L4Ch5Sp7car, Speonomus\_carrerei, CP153L4Ch5Paras7van, Parvospeonomus\_vandeli, CP153L4Ch5Sp7zop, Speonomus\_zophosinus, CP153L4Ch5Sp7nor, Speonomus\_normandi, CP153L4Ch5Sp7hyd, Speonomus\_hydrophilus, CP153L4Ch5Sp7sty, Speonomus\_stygius, CP153L4Ch5Sp7lon, Speonomus\_longicornis, CP153L4Ch5Sp7cur, Speonomus\_curvipes, CP153L4Ch5Sp7fag, Speonomus\_fagniezi, CP153L4Ch5Sp7pyr, Speonomus\_pyreneus, CP153L4Ch5Sp7die, Speonomus\_diecki, CP153L4Ch5Sp7hyg, Speonomus\_hygrophilus, CP153L4Ch5Tr7oro, Trapezodirus\_robios, Staph.idba.25\_MERGED\_MMG\_ANNOT\_FROM\_BARCODE, CP153L4Ch5Tr7cer, Trapezodirus\_cerberus, CP153L4Ch5Tr7car, Trapezodirus\_carrodilTae.

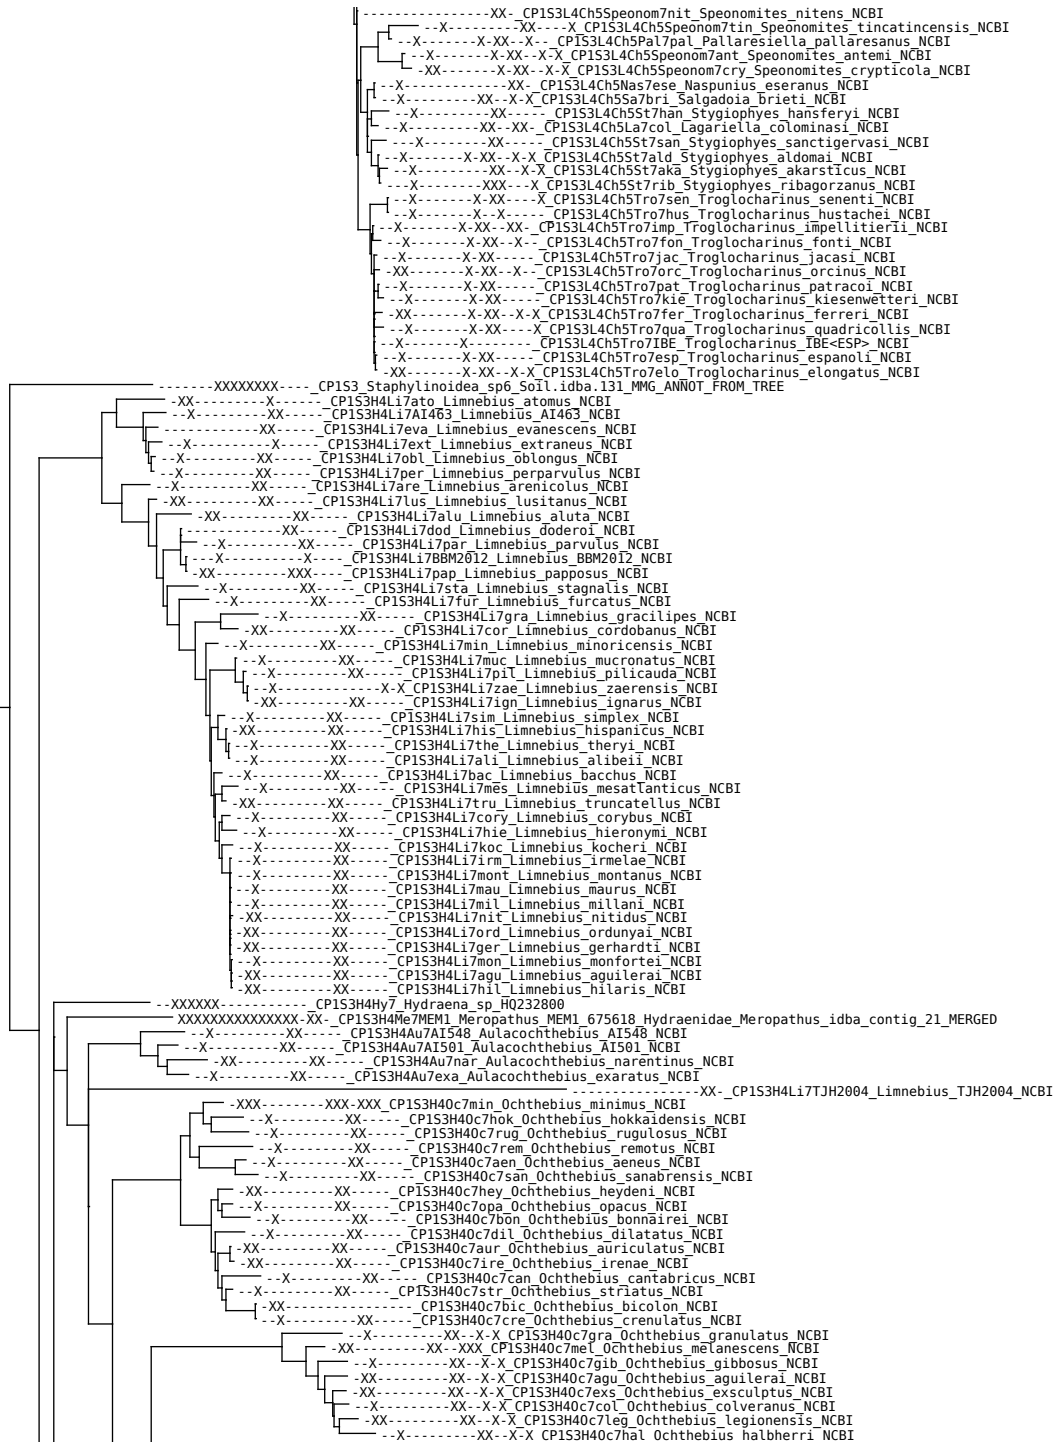

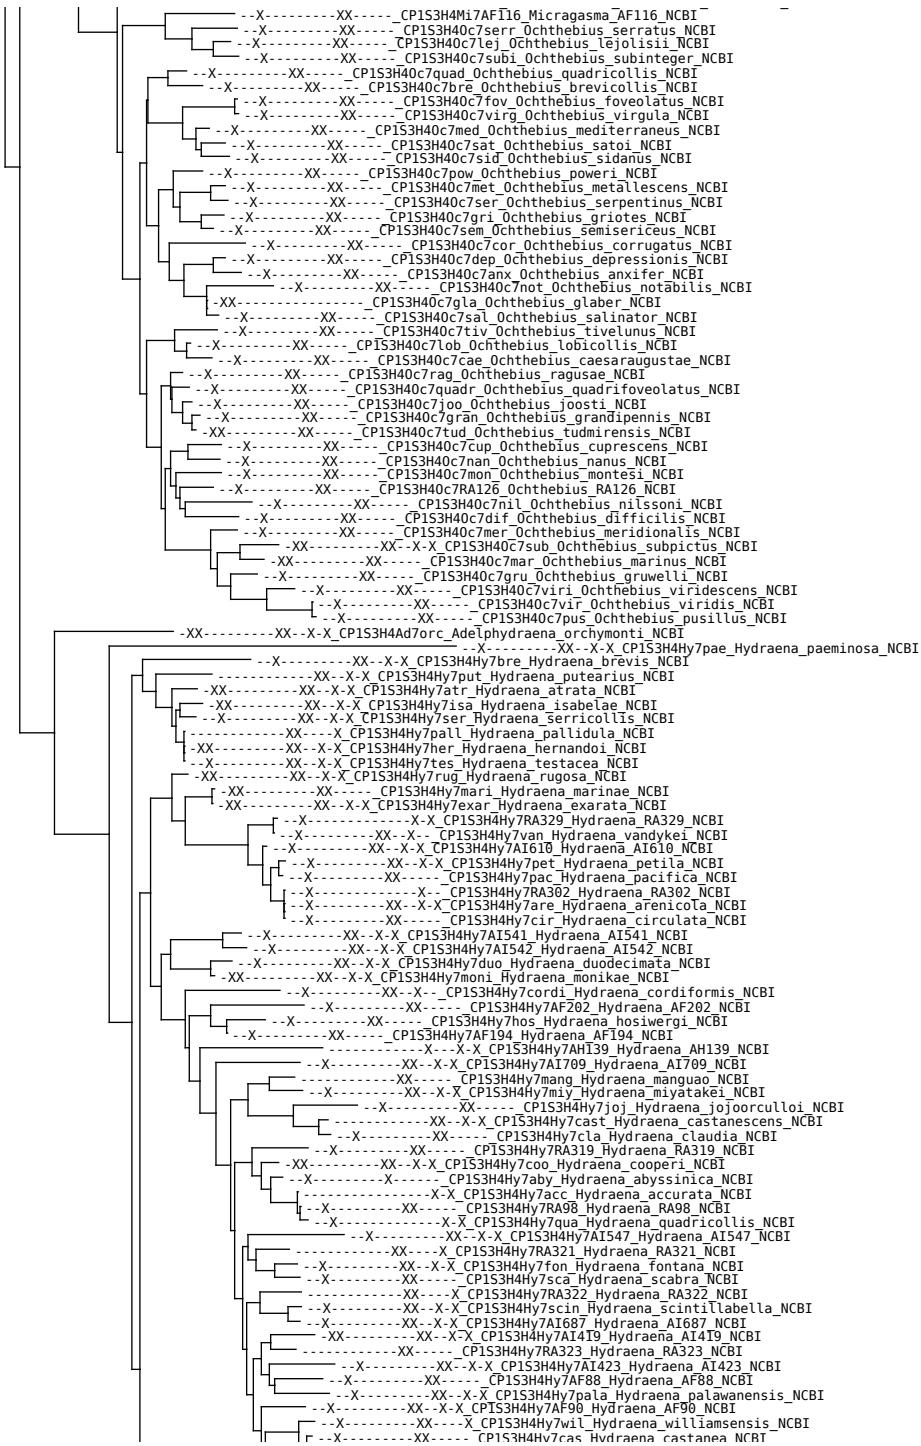

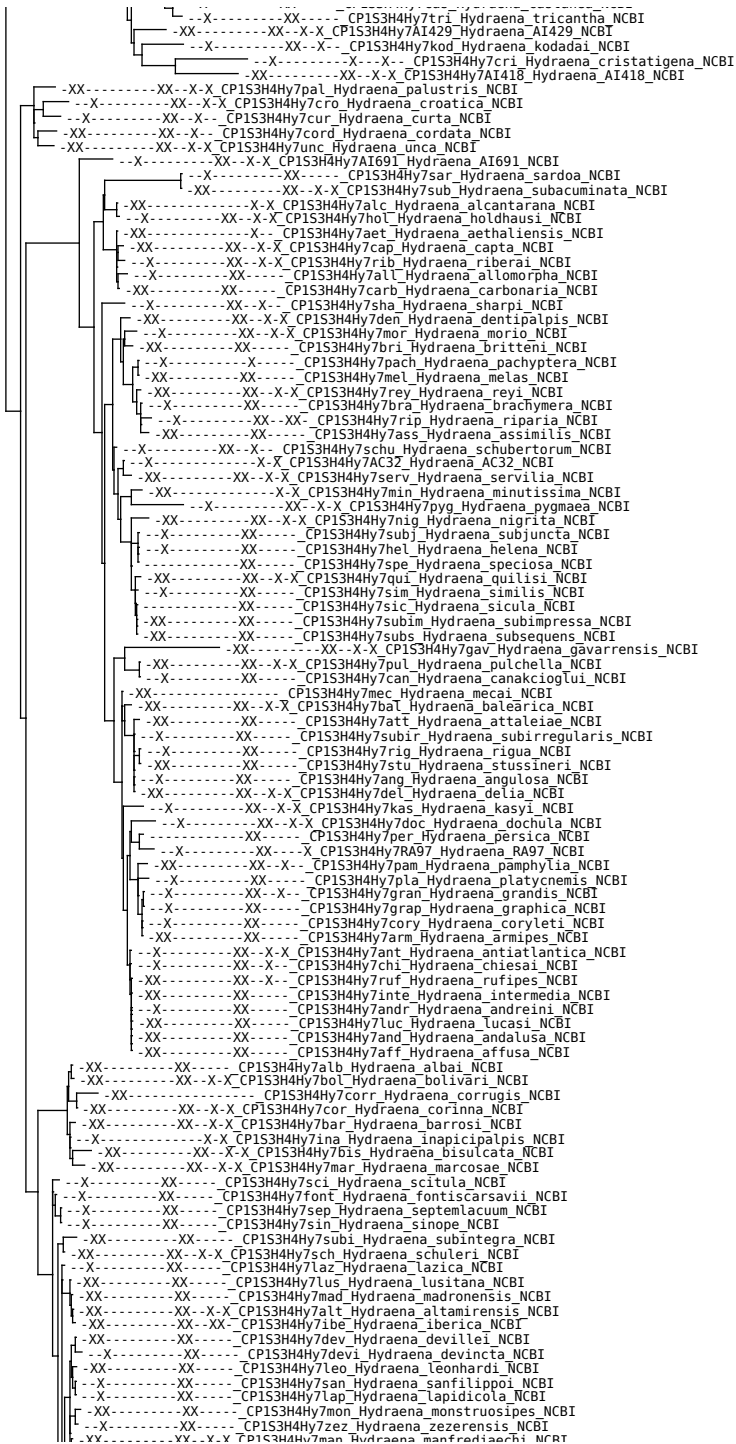

XX-----XX-----CP153H4Hy7gad\_Hydraena\_gaditana\_NCB1  
XX-----XX-----CP153H4Hy7tat\_Hydraena\_tatii\_NCB1  
-X-----XX-----CP153H4Hy7dis\_Hydraena\_discreta\_NCB1  
-X-----XX-----CP153H4Hy7dec\_Hydraena\_decolor\_NCB1  
-X-----XX-----CP153H4Hy7occ\_Hydraena\_occitana\_NCB1  
-X-----XX-----CP153H4Hy7bon\_Hydraena\_bononiensis\_NCB1  
-X-----XX-----CP153H4Hy7sol\_Hydraena\_solaris\_NCB1  
-X-----XX-----CP153H4Hy7dent\_Hydraena\_dentipes\_NCB1  
-X-----XX-----CP153H4Hy7pro\_Hydraena\_producta\_NCB1  
-X-----XX-----CP153H4Hy7mue\_Hydraena\_muelleri\_NCB1  
XX-----XX-X-X-CP153H4Hy7eva\_Hydraena\_evanesens\_NCB1  
-X-----XX-----CP153H4Hy7tyr\_Hydraena\_tyrrhena\_NCB1  
-X-----XX-----CP153H4Hy7ros\_Hydraena\_rosannae\_NCB1  
-X-----XX-----CP153H4Hy7plu\_Hydraena\_plumipes\_NCB1  
XX-----XX-X-X-CP153H4Hy7tru\_Hydraena\_truncata\_NCB1  
-X-----XX-----CP153H4Hy7cze\_Hydraena\_czernohorskyi\_NCB1  
XX-----XX-----CP153H4Hy7het\_Hydraena\_heterogyna\_NCB1  
-X-----XX-X-X-CP153H4Hy7ben\_Hydraena\_bensae\_NCB1  
-X-----XX-----CP153H4Hy7pol\_Hydraena\_pollta\_NCB1  
-X-----XX-----CP153H4Hy7bic\_Hydraena\_bicuspidata\_NCB1  
-X-----XX-----CP153H4Hy7cat\_Hydraena\_catalonica\_NCB1  
-X-----XX-----CP153H4Hy7bit\_Hydraena\_bitruncata\_NCB1  
-X-----XX-X-X-CP153H4Hy7car\_Hydraena\_Carniolica\_NCB1  
XX-----XX-----CP153H4Hy7cau\_Hydraena\_caucasica\_NCB1  
-X-----XX-----CP153H4Hy7epe\_Hydraena\_epeirosi\_NCB1  
-X-----XX-----CP153H4Hy7ved\_Hydraena\_vedraasi\_NCB1  
XX-----XX-XXX-CP153H4Hy7gra\_Hydraena\_gracilis\_NCB1  
-X-----XX-----CP153H4Hy7grac\_Hydraena\_graciloides\_NCB1  
-X-----XX-X-X-CP153H4Hy7cre\_Hydraena\_Crepidoptera\_NCB1  
-X-----XX-----CP153H4Hy7tar\_Hydraena\_tarvisina\_NCB1  
-X-----XX-----CP153H4Hy7lar\_Hydraena\_larissae\_NCB1  
XX-----XX-X-X-CP153H4Hy7exa\_Hydraena\_exasperata\_NCB1  
-X-----XX-----CP153H4Hy7chr\_Hydraena\_christinae\_NCB1  
XX-----XX-----CP153H4Hy7bel\_Hydraena\_belgica\_NCB1  
-X-----XX-----CP153H4Hy7exc\_Hydraena\_excisa\_NCB1  
-X-----XX-----CP153H4Hy7AI391\_Hydraena\_AI391\_NCB1  
-X-----XX-----CP153H4Hy7int\_Hydraena\_integra\_NCB1  
-X-----XX-----CP153H4Hy7akb\_Hydraena\_akbesiana\_NCB1  
-X-----XX-----CP153H4Hy7ana\_Hydraena\_anatolica\_NCB1  
-X-----XX-X-X-CP153H4Hy7ema\_Hydraena\_emarginata\_NCB1  
-X-----XX-----CP153H4Hy7his\_Hydraena\_hispanica\_NCB1  
-X-----XX-----CP153H4Hy7dia\_Hydraena\_diazi\_NCB1  
XX-----XX-----CP153H4Hy7fos\_Hydraena\_fosterorum\_NCB1  
XX-----XX-----CP153H4Hy7alp\_Hydraena\_alpicola\_NCB1  
-X-----XX-----CP153H4Hy7jae\_Hydraena\_jaechiana\_NCB1  
-X-----XX-----CP153H4Hy7sam\_Hydraena\_samnitica\_NCB1  
-X-----XX-----CP153H4Hy7pan\_Hydraena\_pangaei\_NCB1  
-XXX-----XXX-XX-CP1H3E4Ep7AK2004\_Epimetopus\_AK2004\_NCB1  
-XX-----XX-----CP1H3E4Ep7SLE0069\_Epimetopus\_SLE0069\_NCB1  
-XXX-----XXX-XX-CP1H3He4He7\_Helophorus\_aquaticus\_NCB1  
-XXXXXXXXXXXXXXXX-CP1H3\_Hydrophiloides\_sp\_5011\_idba\_106\_MMG\_ANNOT\_FROM\_TREE  
-XX-----X-----CP1H3He4He7BBM2012\_Helophorus\_BBM2012\_NCB1  
-XXX-----XXX-XX-CP1H3He4He7gut\_Helophorus\_guttulus\_NCB1  
XXXXXXXXXXXXXXXX-CP1H3He4He7\_Helophorus\_sp\_724835\_Helophoridae\_Helophorus\_idba\_contig\_13  
-XXX-----XXX-XX-CP1H3He4He7arv\_Helophorus\_arvensis\_NCB1  
-XXX-----XXX-XX-CP1H3He4He7niv\_Helophorus\_nivalis\_NCB1  
-X-----XX-X-X-CP1H3G4Ge7can\_Georissus\_canalifer\_NCB1  
-XXX-----XXX-XX-CP1H3G4Ge7AK2004\_Georissus\_AK2004\_NCB1  
-XX-----XX-XXX-CP1H3G4Ge7cre\_Georissus\_crenulatus\_NCB1  
-X-----X-X-X-CP1H3H4Hy7bre\_Hydrochus\_brevis\_NCB1  
-X-----X-X-X-CP1H3H4Hy7spa\_Hydrochus\_spangleri\_NCB1  
-XX-----X-X-X-X-CP1H3H4Hy7meg\_Hydrochus\_megaphallus\_NCB1  
-X-----X-X-X-X-CP1H3H4Hy7AHG2011\_I\_Hydrochus\_AHG2011\_NCB1  
-X-----X-X-X-CP1H3H4Hy7sto\_Hydrochus\_stolpi\_NCB1  
-X-----X-X-X-CP1H3H4Hy7var\_Hydrochus\_variolatus\_NCB1  
-X-----X-X-X-CP1H3H4Hy7squ\_Hydrochus\_squamifer\_NCB1  
-X-----X-X-X-CP1H3H4Hy7AHG2011\_Hydrochus\_AHG2011\_NCB1  
XXXXXXXXXXXX-CP1H3H4Hy7\_Hydrochus\_sp\_H0232801  
-X-----X-X-X-X-CP1H3H4Hy7sma\_Hydrochus\_smaragdineus\_NCB1  
-X-----X-X-X-X-CP1H3H4Hy7gra\_Hydrochus\_grandicollis\_NCB1  
-XX-----X-X-X-X-CP1H3H4Hy7int\_Hydrochus\_interruptus\_NCB1  
-X-----X-X-X-X-CP1H3H4Hy7nit\_Hydrochus\_nitidicollis\_NCB1  
-X-----X-X-X-X-CP1H3H4Hy7alj\_Hydrochus\_aljibensis\_NCB1  
-X-----X-X-X-XXX-CP1H3H4Hy7eto\_Hydrochus\_elongatus\_NCB1  
-X-----X-X-X-X-CP1H3H4Hy7cre\_Hydrochus\_crenatus\_NCB1  
XXXXXXXXXXXXXXXX-CP1H3H4Hy7car\_Hydrochus\_carinatus\_729517\_Hydrochidae\_Hydrochus\_idba\_contig\_25\_MERGED  
-X-----X-X-X-X-CP1H3H4Hy7tar\_Hydrochus\_tariqi\_NCB1  
XX-----X-X-X-X-CP1H3H4Hy7noo\_Hydrochus\_nooreinus\_NCB1  
XX-----X-X-X-X-CP1H3H4Hy7angu\_Hydrochus\_angusi\_NCB1  
XX-----X-X-X-X-CP1H3H4Hy7ibe\_Hydrochus\_ibericus\_NCB1  
-X-----X-X-X-X-CP1H3H4Hy7fTa\_Hydrochus\_flavipennis\_NCB1  
-X-----X-X-X-X-CP1H3H4Hy7rob\_Hydrochus\_roberti\_NCB1  
XXXXXXXXXXXXXXXX-CP1H3H4Hy7\_Hydrochus\_sp\_1VWB\_idba\_8\_MMG\_ANNOT\_FROM\_BARCODE  
-X-----X-X-XXX-CP1H3H4Hy7ang\_Hydrochus\_angustatus\_NCB1  
-XXX-----XXX-XXX-CP1H3S4Sp7ema\_Spercheus\_emarginatus\_NCB1  
-X-----XX-CP1H3H4H5An7par\_Anacaena\_parvula\_NCB1  
XXXXXXXXXXXXXXXX-CP1H3H4H5Amp7glo\_Amphips\_globus\_JX412726  
-XX-----XX-X-CP1H3H4H5Amp7SLE0408\_Amphips\_SLE0408\_NCB1  
-XX-----XX-----CP1H3H4H5Amp7mat\_Amphips\_mater\_NCB1  
XX-----XX-----CMG2011\_Coleoptera\_MG2011\_NCB1  
-XX-----XX-X-CP1H3H4H5Amp7SLE0407\_Amphips\_SLE0407\_NCB1  
-XX-----XX-CP1H3H4H507mad\_Oocyclus\_madidus\_NCB1  
-XX-----XX-CP1H3H4H507SLE0086\_Oocyclus\_SLE0086\_NCB1  
-XX-----XX-CP1H3H4H507SLE0085\_Oocyclus\_SLE0085\_NCB1  
-XX-----XX-XX-CP1H3H4H5La7ref\_Laccobius\_reflexipennis\_NCB1  
-XXX-----X-----CP1H3H4H5La7bip\_Laccobius\_bipunctatus\_NCB1  
-XX-----XX-----CP1H3H4H5La7sin\_Laccobius\_sinuatus\_NCB1  
XX-----XX-CP1H3H4H5La7ser\_Laccobius\_serratus\_NCB1  
-XXX-----X-----CP1H3H4H5La7str\_Laccobius\_striatus\_NCB1  
-XX-----XX-----CP1H3H4H5La7ser\_Laccobius\_serratus\_NCB1

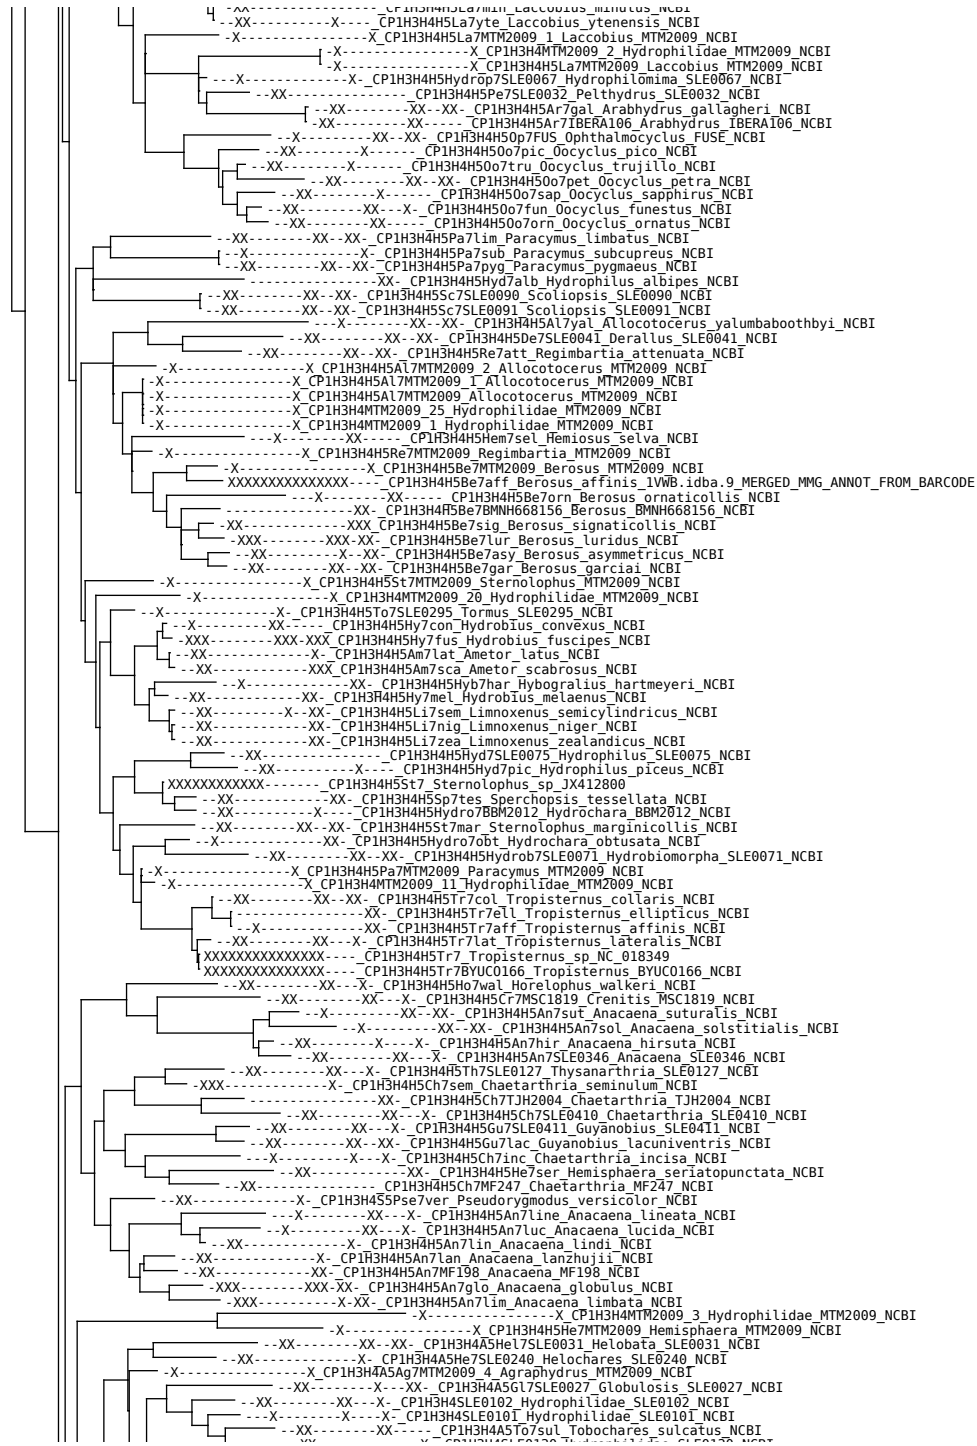

Phylogenetic tree showing relationships between various species, primarily from the Hydrophilidae and Enochrus genera. The tree is rooted on the left and branches out to the right. Species names are listed on the right side of the tree, often followed by their NCBI accession numbers. The tree is annotated with 'X' and 'XX' symbols, likely indicating specific characteristics or data points for each species. The species names include:

- CP1H3H4A5Lew159 Hydrophilidae SLE0159 NCBI
- CP1H3H4A5Ch7SLE0080 Chasmogenus SLE0080 NCBI
- CP1H3H4A5Ch7SLE0077 Chasmogenus SLE0077 NCBI
- CP1H3H4A5Ch7SLE0078 Chasmogenus SLE0078 NCBI
- CP1H3H4A5Ch7rui Chasmogenus ruidus NCBI
- CP1H3H4MTM2009\_23 Hydrophilidae MTM2009 NCBI
- CP1H3H4A5H67han Horelophopsis hanseni NCBI
- CP1H3H4A5Ag7SLE0252 Agraphydrus SLE0252 NCBI
- CP1H3H4MTM2009\_21 Hydrophilidae MTM2009 NCBI
- CP1H3H4MTM2009\_22 Hydrophilidae MTM2009 NCBI
- CP1H3H4A5Ag7MTM2009\_2 Agraphydrus MTM2009 NCBI
- CP1H3H4A5Ag7MTM2009 Agraphydrus MTM2009 NCBI
- CP1H3H4A5Ag7MTM2009\_1 Agraphydrus MTM2009 NCBI
- CP1H3H4H5An7lut Anaecaena lutescens NCBI
- CP1H3H4H5min Helophorus minutus NCBI
- CP1H3H4H5bre Helophorus brevipalpis NCBI
- CP1H3H4A5He7SLE0034 Helochares SLE0034 NCBI
- CP1H3H4A5He7MTM2009\_3 Helochares MTM2009 NCBI
- CP1H3H4A5He7MTM2009\_2 Helochares MTM2009 NCBI
- CP1H3H4A5He7MTM2009\_1 Helochares MTM2009 NCBI
- CP1H3H4MTM2009\_24 Hydrophilidae MTM2009 NCBI
- CP1H3H4H5Ob5 Helochares obscurus NCBI
- CP1H3H4A5He7 Helochares sp. lVNB.idba.18 MMG\_ANNOT\_FROM\_BARCODE
- CP1H3H4A5He7liv Helochares lividus NCBI
- CP1H3H4A5He7MTM2009\_4 Helochares MTM2009 NCBI
- CP1H3H4A5He7MTM2009\_6 Helochares MTM2009 NCBI
- CP1H3H4MTM2009\_5 Hydrophilidae MTM2009 NCBI
- CP1H3H4A5He7MTM2009\_5 Helochares MTM2009 NCBI
- CP1H3H4MTM2009\_18 Hydrophilidae MTM2009 NCBI
- CP1H3H4MTM2009\_17 Hydrophilidae MTM2009 NCBI
- CP1H3H4MTM2009\_14 Hydrophilidae MTM2009 NCBI
- CP1H3H4MTM2009\_10 Hydrophilidae MTM2009 NCBI
- CP1H3H4H5An7MTM2009\_5 Anacaena MTM2009 NCBI
- CP1H3H4MTM2009\_6 Hydrophilidae MTM2009 NCBI
- CP1H3H4H5An7MTM2009 Anacaena MTM2009 NCBI
- CP1H3H4MTM2009\_7 Hydrophilidae MTM2009 NCBI
- CP1H3H4MTM2009\_15 Hydrophilidae MTM2009 NCBI
- CP1H3H4H5An7MTM2009\_4 Anacaena MTM2009 NCBI
- CP1H3H4H5An7MTM2009\_7 Anacaena MTM2009 NCBI
- CP1H3H4H5An7MTM2009\_8 Anacaena MTM2009 NCBI
- CP1H3H4H5An7MTM2009\_1 Anacaena MTM2009 NCBI
- CP1H3H4H5An7MTM2009\_3 Anacaena MTM2009 NCBI
- CP1H3H4MTM2009\_9 Hydrophilidae MTM2009 NCBI
- CP1H3H4MTM2009\_12 Hydrophilidae MTM2009 NCBI
- CP1H3H4MTM2009\_8 Hydrophilidae MTM2009 NCBI
- CP1H3H4H5An7MTM2009\_2 Anacaena MTM2009 NCBI
- CP1H3H4H5An7MTM2009\_6 Anacaena MTM2009 NCBI
- CP1H3H4MTM2009\_13 Hydrophilidae MTM2009 NCBI
- CP1H3H4H5C7mar Cymbiodyta margineella amie.idba.89\_MERGED\_MMG\_ANNOT\_FROM\_BARCODE
- CP1H3H4H5No7lip Notionotus liparus NCBI
- CP1H3H4H5Hel7bif Helocombus bifidus NCBI
- CP1H3H4H5No7SLE0092 Notionotus SLE0092 NCBI
- CP1H3H4H5En7IBEA887 Enochrus IBEA887 NCBI
- CP1H3H4H5En7mas Enochrus mastersii NCBI
- CP1H3H4H5C7sem Cymbiodyta semistriata NCBI
- CP1H3H4H5En7IBEA895 Enochrus IBEA895 NCBI
- CP1H3H4H5En7SLE0241 Enochrus SLE0241 NCBI
- CP1H3H4H5En7tal Enochrus talamanca NCBI
- CP1H3H4H5En7IBEA326 Enochrus IBEA326 NCBI
- CP1H3H4H5En7IBEA889 Enochrus IBEA889 NCBI
- CP1H3H4H5En7IBEA888 Enochrus IBEA888 NCBI
- CP1H3H4H5En7fim Enochrus fimbriatus NCBI
- CP1H3H4H5En7mor Enochrus morenae NCBI
- CP1H3H4H5En7cin Enochrus cinctus NCBI
- CP1H3H4H5En7IBEA84 Enochrus IBEA84 NCBI
- CP1H3H4H5En7pic Enochrus piceus NCBI
- CP1H3H4H5En7nat Enochrus natalensis NCBI
- CP1H3H4H5En7IBEA310 Enochrus IBEA310 NCBI
- CP1H3H4H5En7coa Enochrus coarctatus NCBI
- CP1H3H4H5En7och Enochrus ochraceus NCBI
- CP1H3H4H5En7aff Enochrus affinis NCBI
- CP1H3H4H5En7nig Enochrus nigrinus NCBI
- CP1H3H4H5En7MTM2009\_3 Enochrus MTM2009 NCBI
- CP1H3H4H5En7MTM2009\_2 Enochrus MTM2009 NCBI
- CP1H3H4H5En7MTM2009\_1 Enochrus MTM2009 NCBI
- CP1H3H4MTM2009 Hydrophilidae MTM2009 NCBI
- CP1H3H4MTM2009\_4 Hydrophilidae MTM2009 NCBI
- CP1H3H4H5En7MTM2009\_4 Enochrus MTM2009 NCBI
- CP1H3H4H5En7fal Enochrus falcarius NCBI
- CP1H3H4H5En7hami Enochrus hamifer NCBI
- CP1H3H4H5En7dif Enochrus diffusus NCBI
- CP1H3H4H5En7ham Enochrus hamiltoni NCBI
- CP1H3H4H5En7ate Enochrus ater NCBI
- CP1H3H4H5En7pol Enochrus politus NCBI
- CP1H3H4H5En7hal Enochrus halophilus NCBI
- CP1H3H4H5En7fus Enochrus fuscipennis NCBI
- CP1H3H4H5En7qua Enochrus quadripunctatus NCBI
- CP1H3H4H5En7tes Enochrus testaceus NCBI
- CP1H3H4H5En7IBEA55 Enochrus IBEA55 NCBI
- CP1H3H4H5En7ochr Enochrus ochropterus NCBI
- CP1H3H4H5En7sal Enochrus salomonis NCBI
- CP1H3H4H5En7IBERA490 Enochrus IBERA490 NCBI
- CP1H3H4H5En7bic Enochrus bicolor NCBI
- CP1H3H4H5En7IBERA194 Enochrus IBERA194 NCBI
- CP1H3H4H5En7seg Enochrus segmentinotatus NCBI
- CP1H3H4H5Bentap Badiolobus tapanti NCBI
- CP1H3H4H5Cy7gla Cylomissus glabratus NCBI
- CP1H3H4H5S5a7SLE0099 Saphydrus SLE0099 NCBI
- CP1H3H4H5Hy7fro Hydrostygnus frontalis NCBI



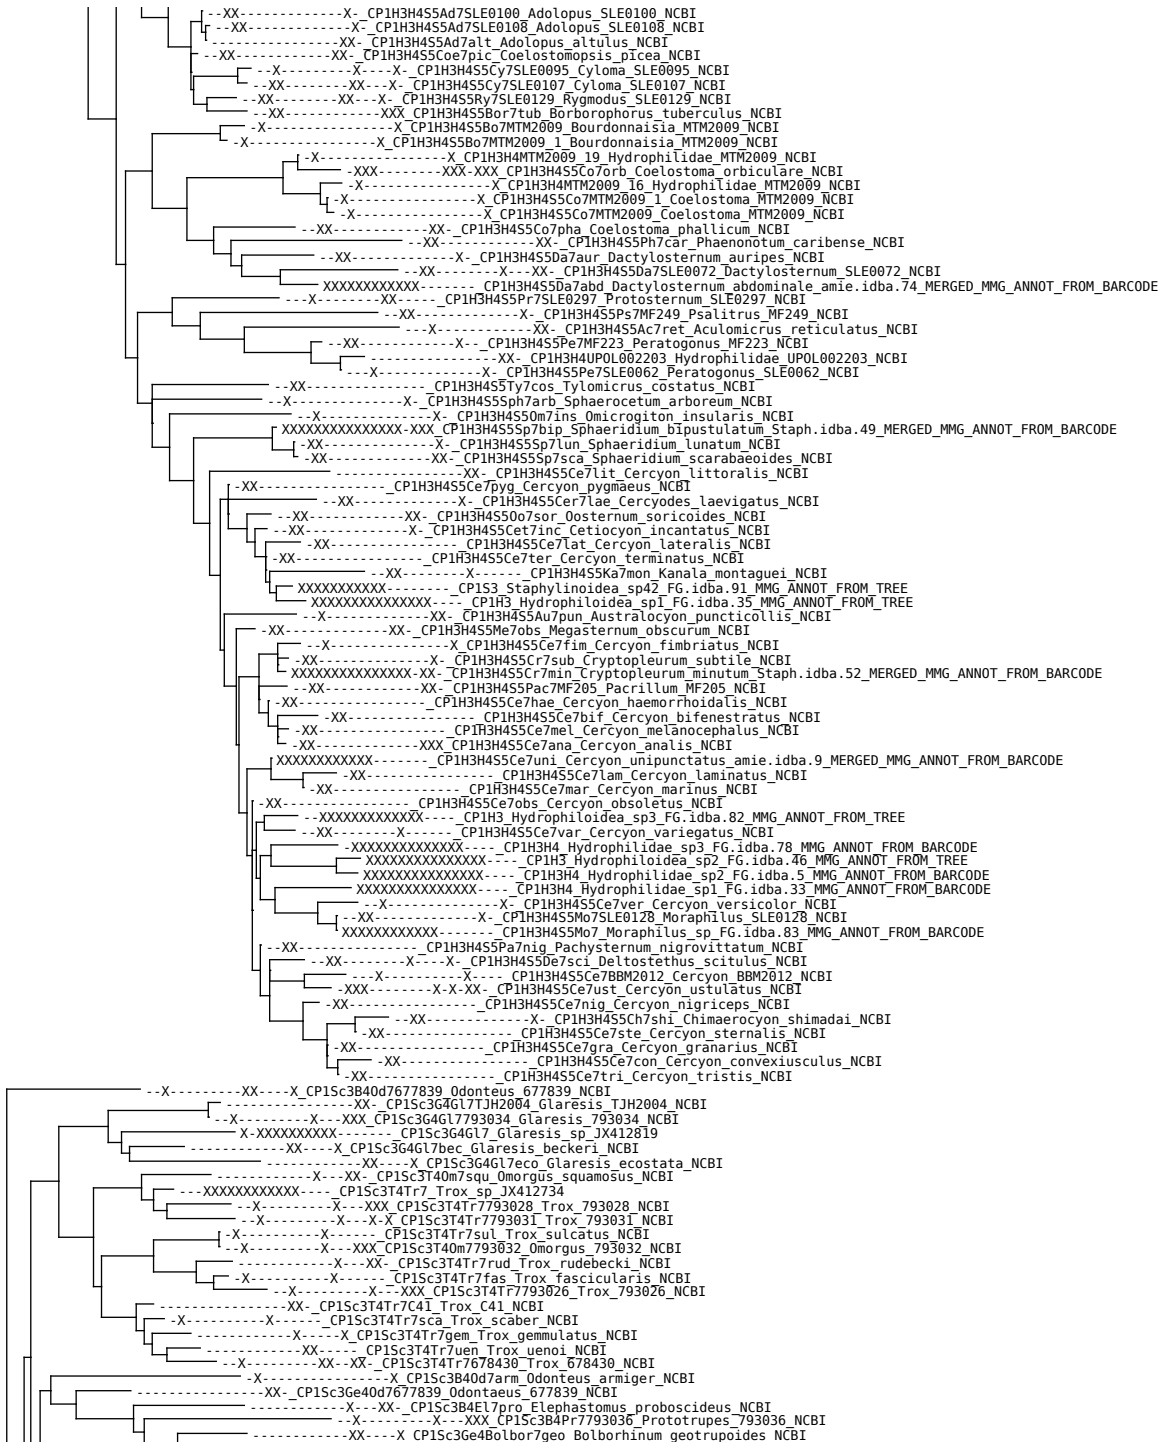

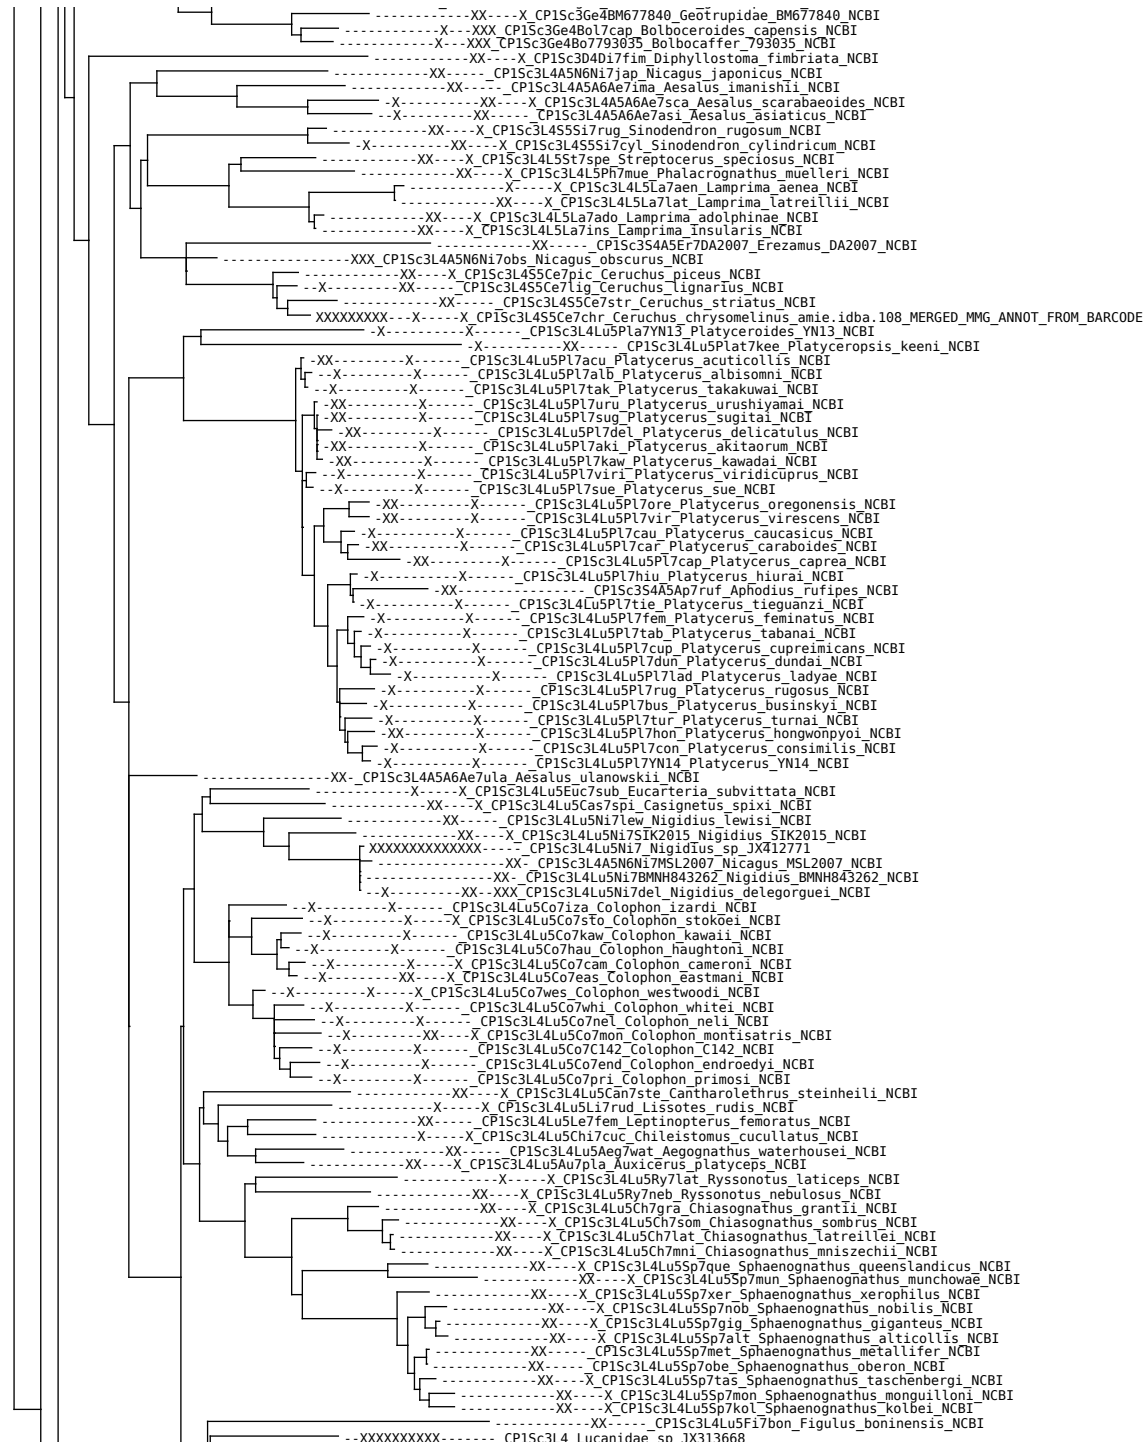

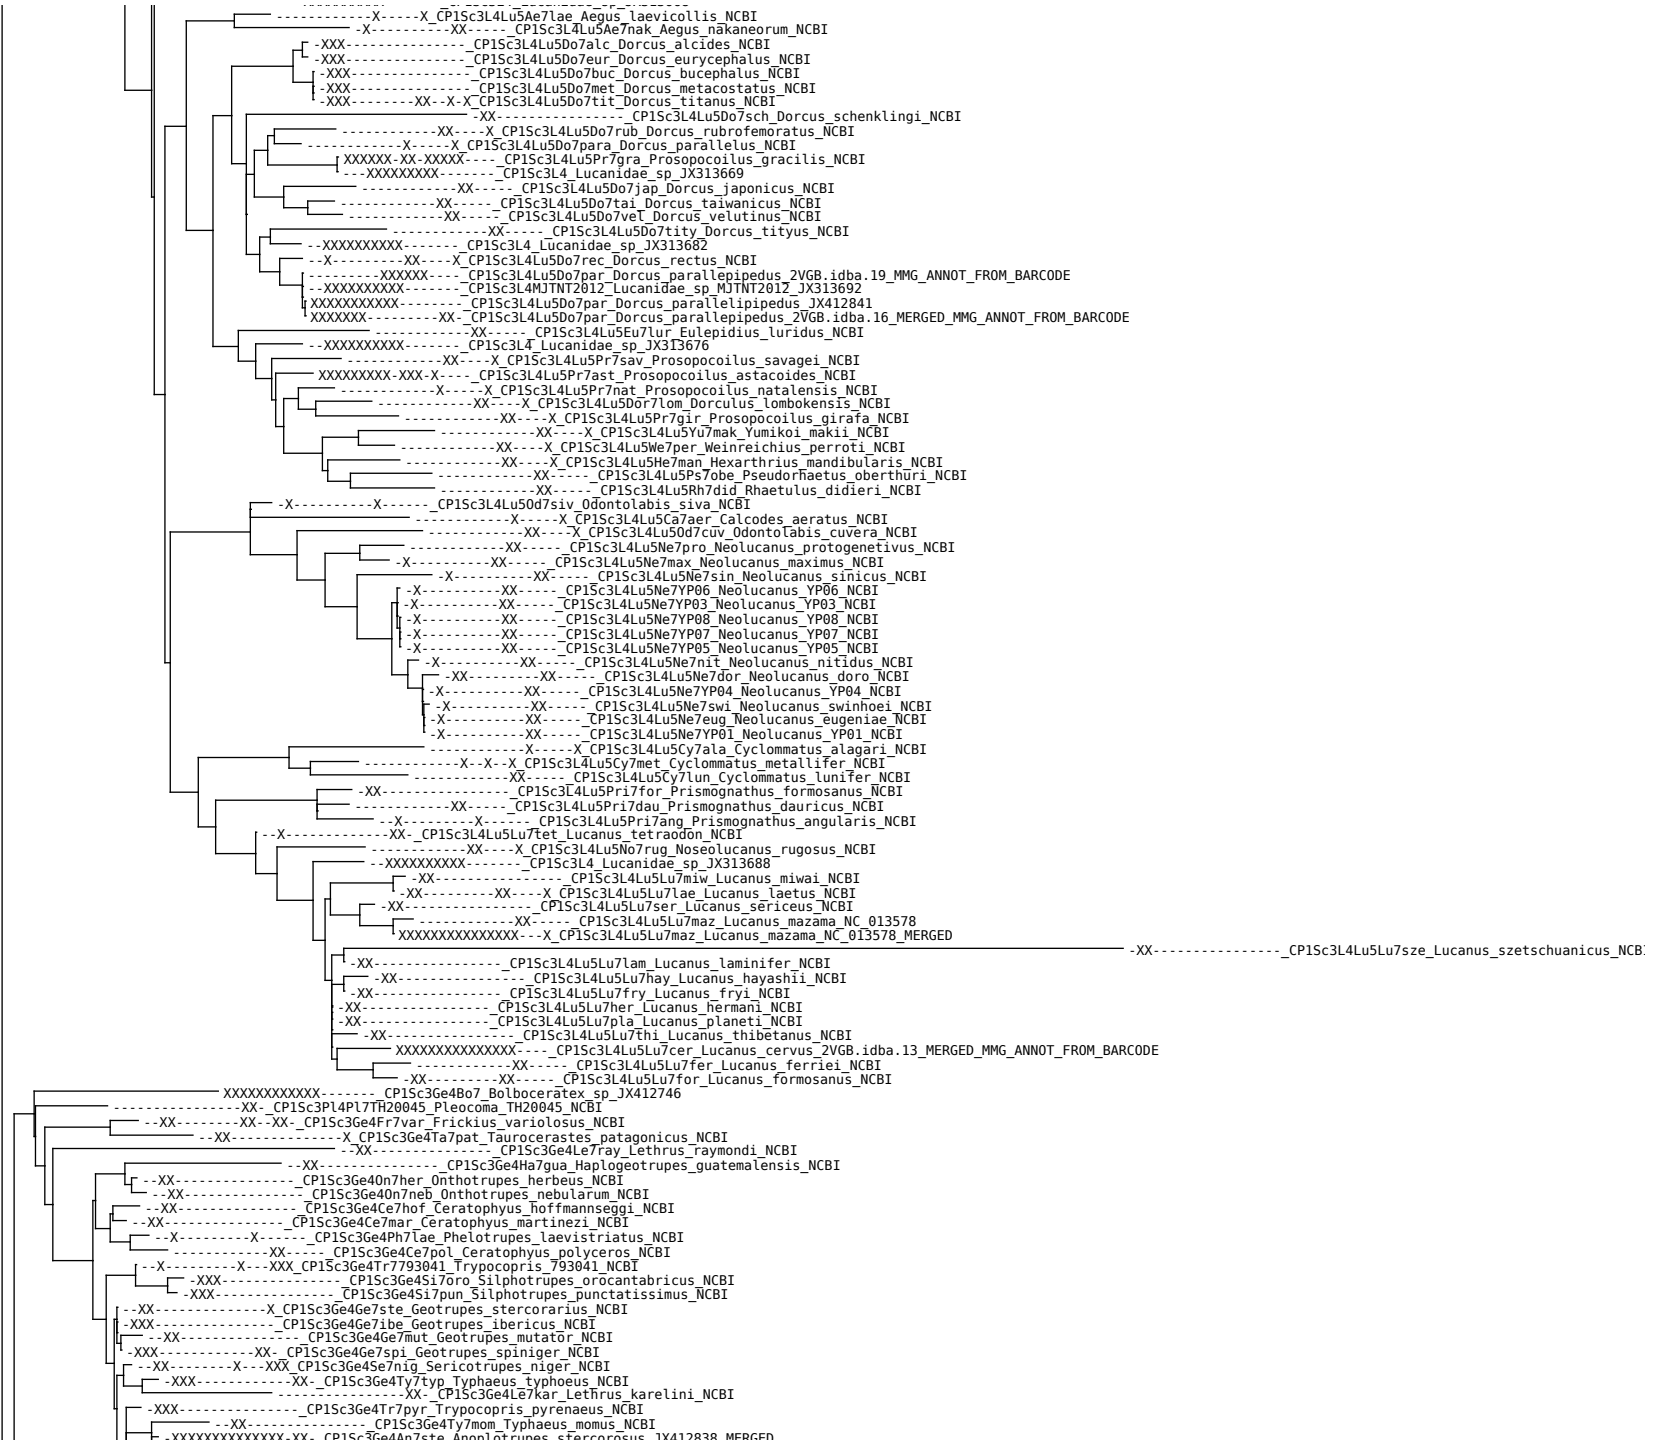

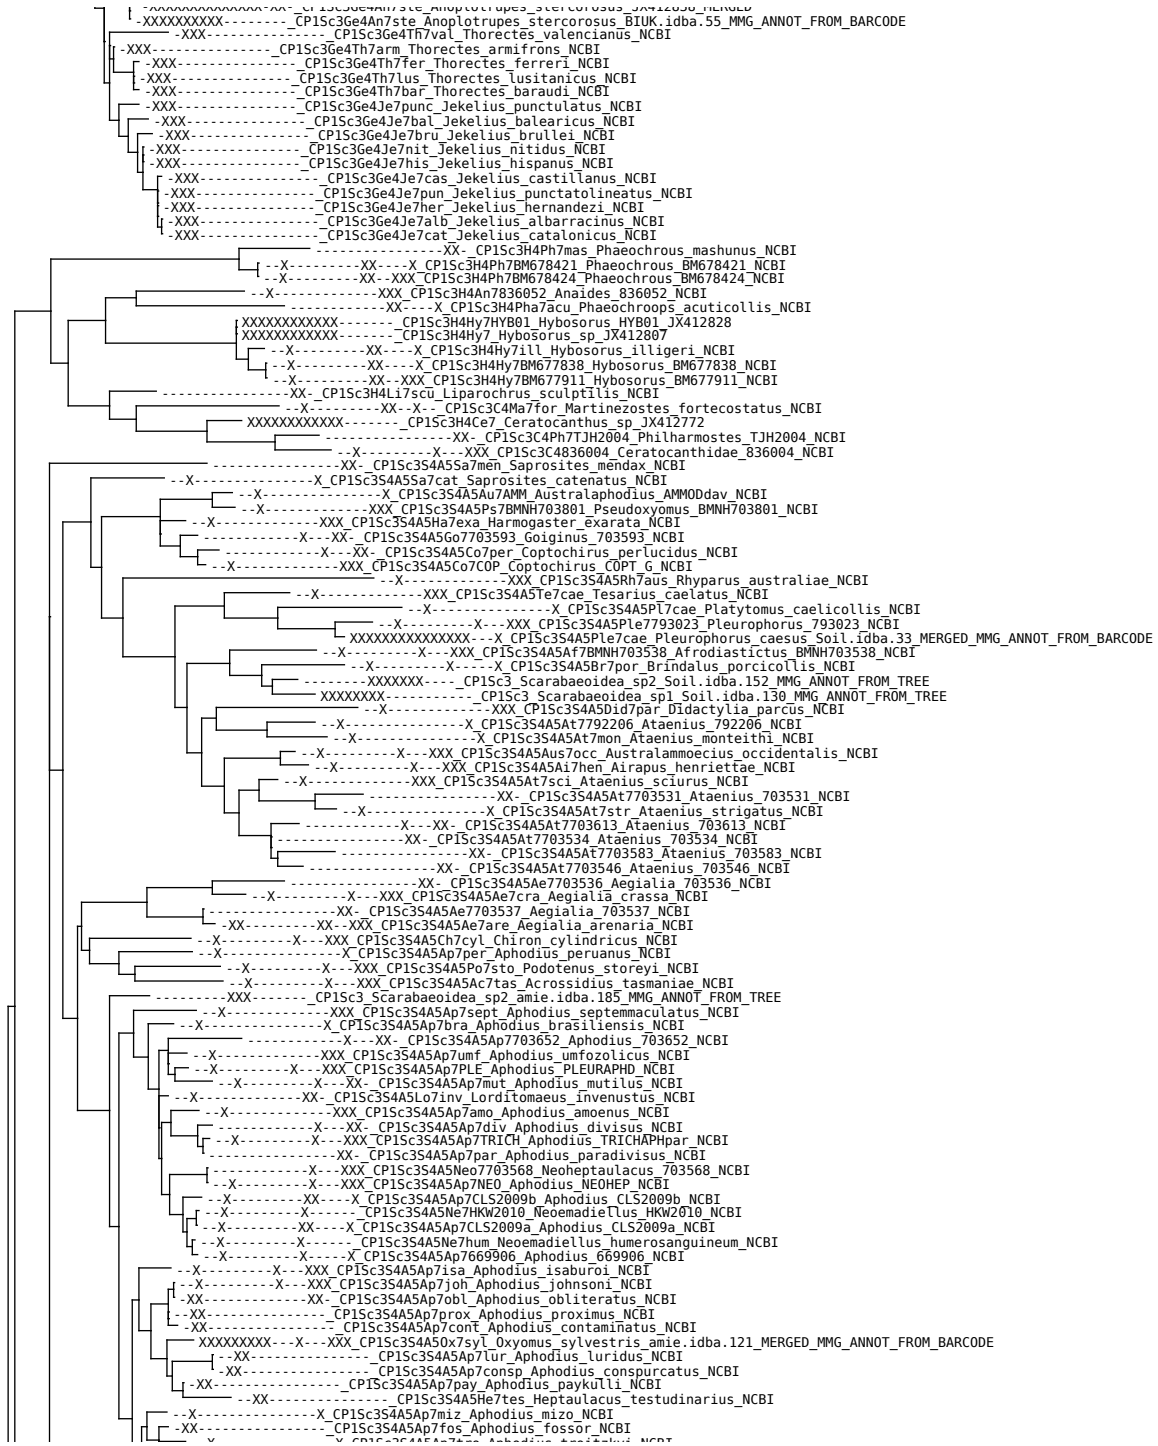

Phylogenetic tree showing relationships between various species, with labels such as CP1Sc354A5D17tru, CP1Sc354A5A7fri, and CP1Sc354A5A7ann. The tree is rooted on the left and branches out to the right. Species names are listed next to their corresponding branches, often preceded by a series of dashes (e.g., -X-, -XX-, -XXX-) indicating support or classification. Some labels include accession numbers and database identifiers like 'Soil.idba.32\_MERGED\_MMG\_ANNOT\_FROM\_BARCODE' or 'Soil.idba.115\_MERGED\_MMG\_ANNOT\_FROM\_TREE'. The tree shows a complex branching pattern, with many species having very similar labels, indicating close relationships. The labels are arranged in a roughly vertical column on the right side of the tree, with some species names appearing multiple times for different branches. The tree is a cladogram, with the root at the top left and branches extending downwards and to the right. The labels are aligned with the tips of the branches. The tree is a cladogram, with the root at the top left and branches extending downwards and to the right. The labels are aligned with the tips of the branches. The tree is a cladogram, with the root at the top left and branches extending downwards and to the right. The labels are aligned with the tips of the branches.

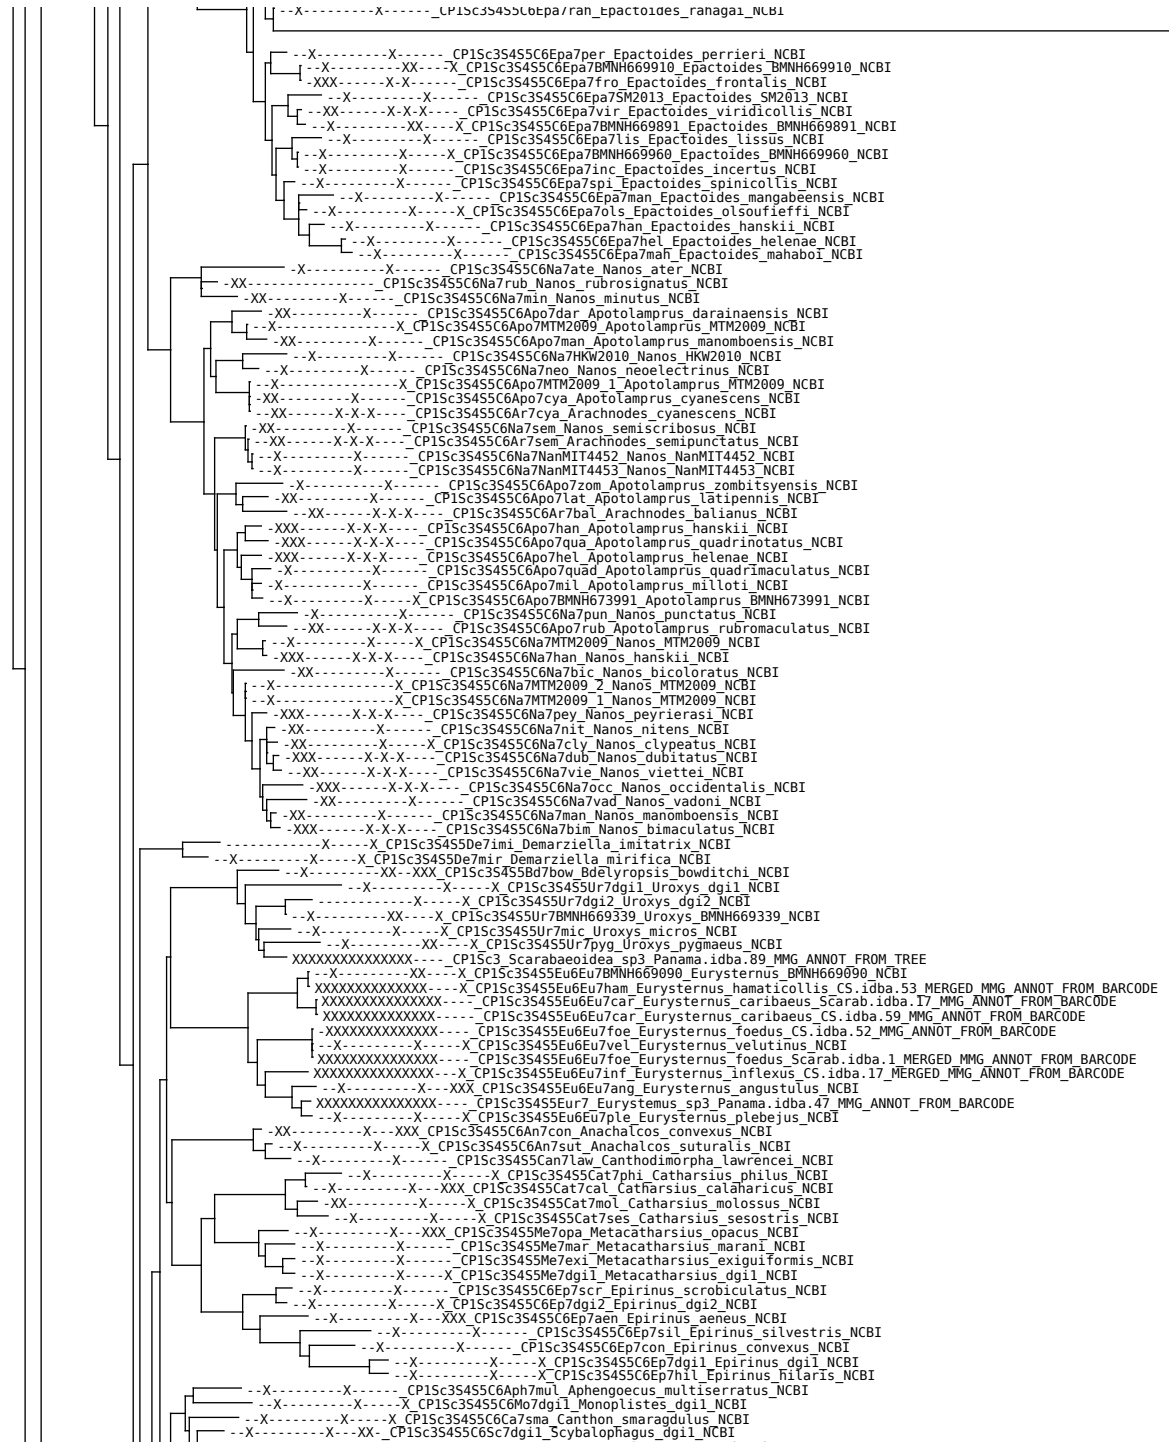

CP1Sc35455C6Epa7ran\_Epactoides\_ranagai\_NCBI

CP1Sc35455C6Epa7per\_Epactoides\_perrieri\_NCBI  
CP1Sc35455C6Epa7BMNH669910\_Epactoides\_BMNH669910\_NCBI  
CP1Sc35455C6Epa7fro\_Epactoides\_frontalis\_NCBI  
CP1Sc35455C6Epa7SM2013\_Epactoides\_SM2013\_NCBI  
CP1Sc35455C6Epa7vir\_Epactoides\_viridicollis\_NCBI  
CP1Sc35455C6Epa7BMNH669891\_Epactoides\_BMNH669891\_NCBI  
CP1Sc35455C6Epa7lis\_Epactoides\_lissus\_NCBI  
CP1Sc35455C6Epa7BMNH669960\_Epactoides\_BMNH669960\_NCBI  
CP1Sc35455C6Epa7inc\_Epactoides\_incertus\_NCBI  
CP1Sc35455C6Epa7spi\_Epactoides\_spinicollis\_NCBI  
CP1Sc35455C6Epa7man\_Epactoides\_mangabeensis\_NCBI  
CP1Sc35455C6Epa7ols\_Epactoides\_olsoufieffi\_NCBI  
CP1Sc35455C6Epa7han\_Epactoides\_hanskii\_NCBI  
CP1Sc35455C6Epa7hel\_Epactoides\_helenae\_NCBI  
CP1Sc35455C6Epa7mah\_Epactoides\_mahaboi\_NCBI

CP1Sc35455C6Na7ate\_Nanos\_ater\_NCBI  
CP1Sc35455C6Na7rub\_Nanos\_rubrosignatus\_NCBI  
CP1Sc35455C6Na7min\_Nanos\_minutus\_NCBI  
CP1Sc35455C6Apo7da\_Apotolamprus\_darainaensis\_NCBI  
CP1Sc35455C6Apo7MTM2009\_Apotolamprus\_MTM2009\_NCBI  
CP1Sc35455C6Apo7man\_Apotolamprus\_manomboensis\_NCBI  
CP1Sc35455C6Na7HKW2010\_Nanos\_HKW2010\_NCBI  
CP1Sc35455C6Na7neo\_Nanos\_neoelectrinus\_NCBI  
CP1Sc35455C6Apo7MTM2009\_1\_Apotolamprus\_MTM2009\_NCBI  
CP1Sc35455C6Apo7cya\_Apotolamprus\_cyanescens\_NCBI  
CP1Sc35455C6Ar7cya\_Arachnodes\_cyanescens\_NCBI  
CP1Sc35455C6Na7sem\_Nanos\_semiscribosus\_NCBI  
CP1Sc35455C6Ar7sem\_Arachnodes\_semipunctatus\_NCBI  
CP1Sc35455C6Na7NanMIT4452\_Nanos\_NanMIT4452\_NCBI  
CP1Sc35455C6Na7NanMIT4453\_Nanos\_NanMIT4453\_NCBI

CP1Sc35455C6Apo7zom\_Apotolamprus\_zombiisensis\_NCBI  
CP1Sc35455C6Apo7lat\_Apotolamprus\_latipennis\_NCBI  
CP1Sc35455C6Ar7ba\_Arachnodes\_balianus\_NCBI  
CP1Sc35455C6Apo7han\_Apotolamprus\_hanskii\_NCBI  
CP1Sc35455C6Apo7qua\_Apotolamprus\_quadrirotatus\_NCBI  
CP1Sc35455C6Apo7hel\_Apotolamprus\_helenae\_NCBI  
CP1Sc35455C6Apo7qua\_Apotolamprus\_quadrimaculatus\_NCBI  
CP1Sc35455C6Apo7mit\_Apotolamprus\_milloti\_NCBI  
CP1Sc35455C6Apo7BMNH673991\_Apotolamprus\_BMNH673991\_NCBI  
CP1Sc35455C6Na7pun\_Nanos\_punctatus\_NCBI  
CP1Sc35455C6Apo7rub\_Apotolamprus\_rubromaculatus\_NCBI  
CP1Sc35455C6Na7MTM2009\_Nanos\_MTM2009\_NCBI  
CP1Sc35455C6Na7han\_Nanos\_hanskii\_NCBI  
CP1Sc35455C6Na7bic\_Nanos\_bicoloratus\_NCBI  
CP1Sc35455C6Na7MTM2009\_2\_Nanos\_MTM2009\_NCBI  
CP1Sc35455C6Na7MTM2009\_1\_Nanos\_MTM2009\_NCBI  
CP1Sc35455C6Na7pey\_Nanos\_peyrrierasi\_NCBI  
CP1Sc35455C6Na7nit\_Nanos\_nitens\_NCBI  
CP1Sc35455C6Na7cly\_Nanos\_clypeatus\_NCBI  
CP1Sc35455C6Na7dub\_Nanos\_dubitus\_NCBI  
CP1Sc35455C6Na7vie\_Nanos\_viettei\_NCBI  
CP1Sc35455C6Na7occ\_Nanos\_occidentalis\_NCBI  
CP1Sc35455C6Na7vad\_Nanos\_vadoni\_NCBI  
CP1Sc35455C6Na7man\_Nanos\_manomboensis\_NCBI  
CP1Sc35455C6Na7bim\_Nanos\_bimaculatus\_NCBI  
CP1Sc35455De7imi\_Demarziella\_imitatrix\_NCBI  
CP1Sc35455De7mir\_Demarziella\_mirifica\_NCBI  
CP1Sc35455Bd7bow\_Bdelyropsis\_bowditchi\_NCBI  
CP1Sc35455U7dgi1\_Uroxys\_dgi1\_NCBI  
CP1Sc35455U7dgi2\_Uroxys\_dgi2\_NCBI  
CP1Sc35455U7BMNH669339\_Uroxys\_BMNH669339\_NCBI  
CP1Sc35455U7mic\_Uroxys\_micros\_NCBI  
CP1Sc35455U7pyg\_Uroxys\_pygmaeus\_NCBI

CP1Sc3 Scarabaeoidea\_sp3\_Panama.idba.89\_MMG\_ANNOT\_FROM\_TREE  
CP1Sc35455Eu6Eu7BMNH669090\_Eurysternus\_BMNH669090\_NCBI  
CP1Sc35455Eu6Eu7ham\_Eurysternus\_hamaticollis\_CS.idba.53\_MERGED\_MMG\_ANNOT\_FROM\_BARCODE  
CP1Sc35455Eu6Eu7caF\_Eurysternus\_caribaeus\_Scarab.idba.17\_MMG\_ANNOT\_FROM\_BARCODE  
CP1Sc35455Eu6Eu7car\_Eurysternus\_caribaeus\_CS.idba.59\_MMG\_ANNOT\_FROM\_BARCODE  
CP1Sc35455Eu6Eu7foe\_Eurysternus\_foedus\_CS.idba.52\_MMG\_ANNOT\_FROM\_BARCODE  
CP1Sc35455Eu6Eu7vel\_Eurysternus\_velutinus\_NCBI  
CP1Sc35455Eu6Eu7foe\_Eurysternus\_foedus\_Scarab.idba.1\_MERGED\_MMG\_ANNOT\_FROM\_BARCODE  
CP1Sc35455Eu6Eu7int\_Eurysternus\_intlexus\_CS.idba.17\_MERGED\_MMG\_ANNOT\_FROM\_BARCODE  
CP1Sc35455Eu6Eu7ang\_Eurysternus\_angustulus\_NCBI  
CP1Sc35455Eur7\_Eurysternus\_sp3\_Panama.idba.47\_MMG\_ANNOT\_FROM\_BARCODE  
CP1Sc35455Eu6Eu7ple\_Eurysternus\_plebejus\_NCBI  
CP1Sc35455C6An7con\_Anachalcos\_convexus\_NCBI  
CP1Sc35455C6An7sut\_Anachalcos\_suturalis\_NCBI  
CP1Sc35455Can7Law\_Canthodimorpha\_lawrencei\_NCBI  
CP1Sc35455Cat7phi\_Catharsius\_philus\_NCBI  
CP1Sc35455Cat7cal\_Catharsius\_calaharicus\_NCBI  
CP1Sc35455Cat7mol\_Catharsius\_molossus\_NCBI  
CP1Sc35455Cat7ses\_Catharsius\_sesostris\_NCBI  
CP1Sc35455Me7opa\_Metacatharsius\_opacus\_NCBI  
CP1Sc35455Me7mar\_Metacatharsius\_meranti\_NCBI  
CP1Sc35455Me7exi\_Metacatharsius\_exiguiformis\_NCBI  
CP1Sc35455Me7dgi1\_Metacatharsius\_dgi1\_NCBI  
CP1Sc35455C6Ep7scr\_Epirinus\_scrobiculatus\_NCBI  
CP1Sc35455C6Ep7dgi2\_Epirinus\_dgi2\_NCBI  
CP1Sc35455C6Ep7aen\_Epirinus\_aeneus\_NCBI  
CP1Sc35455C6Ep7sil\_Epirinus\_silvestris\_NCBI  
CP1Sc35455C6Ep7con\_Epirinus\_convexus\_NCBI  
CP1Sc35455C6Ep7dgi1\_Epirinus\_dgi1\_NCBI  
CP1Sc35455C6Ep7hil\_Epirinus\_hilaris\_NCBI  
CP1Sc35455C6Aph7mul\_Aphenoecus\_multiserratus\_NCBI  
CP1Sc35455C6Mo7dgi1\_Monoplistes\_dgi1\_NCBI  
CP1Sc35455C6Ca7sma\_Canthon\_smaragdulus\_NCBI  
CP1Sc35455C6Sc7dgi1\_Scybalophagus\_dgi1\_NCBI

Phylogenetic tree showing relationships between various species, primarily from the order Hymenoptera. The tree is rooted on the left and branches out to the right. Species names are listed on the right side of the tree, often followed by accession numbers and source information. The tree is divided into several major clades, including:

- Phaneroptera**: Includes species like *CP1Sc35455C6Me7can\_Megathoposoma candezei*, *CP1Sc35455C6Ha7aff\_Hansreia affinis*, *CP1Sc35455C6Eu7dyt\_Eudinopus dytiscoides*, *CP1Sc35455C6Ca7ind\_Canthon indigaeus*, *CP1Sc35455C6Ca7vir\_Canthon viridis*, *CP1Sc35455C6Ca7lut\_Canthon luteicollis*, *CP1Sc35455C6Ca7aeq\_Canthon aequinoctialis*, *CP1Sc35455C6Ca7doe\_Canthon doeseurii*, *CP1Sc35455C6Ca7mau\_Paragymnoleurus maus*, *CP1Sc35455C6Ca7gib\_Deltochilum gibbosum*, *CP1Sc35455C6De7ama\_Deltochilum amazonicum*, *CP1Sc35455C6De7car\_Deltochilum carinatum*, *CP1Sc35455C6De7bar\_Deltochilum barbipes*, *CP1Sc35455C6De7pse\_Deltochilum pseudoparile*, *CP1Sc35455C6Li7mut\_Litocopris muticus*, *CP1Sc35455C6Co7lun\_Copris lunaris*, *CP1Sc35455C6Co7agn\_Copris agnus*, *CP1Sc35455C6Co7tri\_Copris tripartitus*, *CP1Sc35455C6Co7lug\_Copris lugubris*, *CP1Sc35455C6Co7aen\_Copris aeneus*, *CP1Sc35455C6Co7amy\_Copris amyntor*, *CP1Sc35455C6Co7dgi1\_Copris dgi1*, *CP1Sc35455Cat7SM2012\_Catharsius SM2012*, *CP1Sc35455C6Co7cor\_Copris cornifrons*, *CP1Sc35455C6Co7his\_Copris hispanicus*, *CP1Sc35455C6Co7con\_Copris confucius*, *CP1Sc35455C6Co7sin\_Copris sinicus*, *CP1Sc35455A6At7dgi1\_Ateuchus dgi1*, *CP1Sc35455A6A7aur\_Canthidium aurifex*, *CP1Sc35455A6A7chr\_Chrysopyge*, *CP1Sc35455A6At7CWC2007\_Ateuchus CWC2007*, *CP1Sc35455A6At7ecu\_Ateuchus ecuadorensis*, *CP1Sc35455E6En7lob\_Ennearabdus lobocephalus*, *CP1Sc35455E6Eu7ara\_Eucranium arachnoides*, *CP1Sc35455E6G17ste\_Glyphoderus sterquilinus*, *CP1Sc35455E6An7bil\_Anomiopsoides biloba*, *CP1Sc35455E6An7het\_Anomiopsoides heteroclyta*, *CP1Sc35455Pha7sal\_Phanaeus sallei*, *CP1Sc35455Pha7cam\_Phanaeus cambeforti*, *CP1Sc35455Dx7con\_Oxyteron conspiciatum*, *CP1Sc35455Dla7mim\_Diabroctis mias*, *CP1Sc35455Pha7dem\_Phanaeus demon*, *CP1Sc35455Pha7CWC2007\_Phanaeus CWC2007*, *CP1Sc35455Cop7lan\_Coprophanaeus lancifer*, *CP1Sc35455Den7bah\_Dendropaemon bahianum*, *CP1Sc35455Pha7end\_Phanaeus endymion*, *CP1Sc35455Cop7tel\_Coprophanaeus telamon*, *CP1Sc35455Cop7dgi1\_Coprophanaeus dgi1*, *CP1Sc35455Cop7Gromphas aerguginosa*, *CP1Sc35455Jat7SM2013\_Janssensantus SM2013*, *CP1Sc35455C6Ta7SM2013\_Tanzanelus SM2013*, *CP1Sc35455A6Ca7har\_Canthidium haroldi*, *CP1Sc35455A6Ca7ruf\_Canthidium rufinum*, *CP1Sc35455A6Ca7gua\_Canthidium guanacaste*, *CP1Sc35455A6Ca7tha\_Canthidium thalassinum*, *CP1Sc35455Di7sat\_Dichotomius satanas*, *CP1Sc35455Di7dgi1\_Dichotomius dgi1*, *CP1Sc35455Di7bor\_Dichotomius boreus*, *CP1Sc35455Di7yuc\_Dichotomius yucatanus*, *CP1Sc35455Di7par\_Dichotomius parcepunctatus*, *CP1Ch3485B6Ac7pall\_Acanthoscelides pallidipennis*, *CP1Sc35455Di7nis\_Dichotomius nisus*, *CP1Sc35455Di7lae\_Dichotomius laeivcollis*, *CP1Sc35455Di7bos\_Dichotomius bos*, *CP1Sc35455Di7sem\_Dichotomius semisquamosus*, *CP1Sc35455Di7ser\_Dichotomius sericeus*, *CP1Sc35455Di7gem\_Dichotomius geminatus*, *CP1Sc35455C6Ar7mor1\_Arachnoides morio*, *CP1Sc35455C6Ar7cup\_Arachnoides cuparius*, *CP1Sc35455C6Ar7MTM2009\_10\_Arachnoides MTM2009*, *CP1Sc35455C6Ar7kel\_Arachnoides kelifelyi*, *CP1Sc35455C6Ar7MTM2009\_9\_Arachnoides MTM2009*, *CP1Sc35455C6Ar7HKW2010\_Arachnoides HKW2010*, *CP1Sc35455C6Ar7mah\_Arachnoides mahafalyensis*, *CP1Sc35455C6Ar7sap\_Arachnoides saprinoides*, *CP1Sc35455C6Ar7MTM2009\_2\_Arachnoides MTM2009*, *CP1Sc35455C6Ar7MTM2009\_5\_Arachnoides MTM2009*, *CP1Sc35455C6Ar7pus\_Arachnoides pusillus*, *CP1Sc35455C6Ar7MTM2009\_4\_Arachnoides MTM2009*, *CP1Sc35455C6Ar7and\_Arachnoides andrei*, *CP1Sc35455P57sem\_Pseudoarachnoides semichalceus*

The tree shows a complex branching pattern, with many nodes supported by bootstrap values (indicated by 'X' or 'XX'). The species names are often followed by accession numbers and source information, such as 'NCBI' or 'MMG\_ANNOT\_FROM\_BARCODE'.

Phylogenetic tree showing relationships between various species, primarily from the order Arachnida. The tree is rooted on the left and branches out to the right. Each terminal node is labeled with a species name and a NCBI accession number. The labels are preceded by dashes (-) and 'X's, indicating the presence or absence of certain characters or features. The species names are often followed by 'NCBI'.

Species listed include:

- CP1Sc35455C6Ar7MTM2009\_3\_Arachnodes\_MTM2009\_NCBI
- CP1Sc35455C6Ar7BMNH669969\_Arachnodes\_BMNH669969\_NCBI
- CP1Sc35455Ps7han\_Pseudoarachnodes\_hanski NCBI
- CP1Sc35455C6Ar7man\_Arachnodes\_manaltrai NCBI
- CP1Sc35455C6Ar7LO2006\_Arachnodes\_LO2006\_NCBI
- CP1Sc35455C6Ar7MTM2009\_12\_Arachnodes\_MTM2009\_NCBI
- CP1Sc35455C6Ar7semi\_Arachnodes\_seminitidus\_NCBI
- CP1Sc35455C6Ar7gen\_Arachnodes\_genieri NCBI
- CP1Sc35455C6Ar7MTM2009\_8\_Arachnodes\_MTM2009\_NCBI
- CP1Sc35455C6Ar7HKW2010\_1\_Arachnodes\_HKW2010\_NCBI
- CP1Sc35455C6Ar7rut\_Arachnodes\_ruteri NCBI
- CP1Sc35455C6Ar7mant\_Arachnodes\_mantaoae NCBI
- CP1Sc35455C6Ar7del\_Arachnodes\_delphinensis NCBI
- CP1Sc35455C6Ar7MTM2009\_Arachnodes\_MTM2009\_NCBI
- CP1Sc35455C6Ar7MTM2009\_1\_Arachnodes\_MTM2009\_NCBI
- CP1Sc35455C6Ar7MTM2009\_6\_Arachnodes\_MTM2009\_NCBI
- CP1Sc35455C6Ar7MTM2009\_7\_Arachnodes\_MTM2009\_NCBI
- CP1Sc35455C6Ar7apo\_Arachnodes\_apotolamproides\_NCBI
- CP1Sc35455C6Ar7ant\_Arachnodes\_antoetrae NCBI
- CP1Sc35455C6Ar7gro\_Arachnodes\_grossepunctatus\_NCBI
- CP1Sc35455C6Ar7pra\_Arachnodes\_prasinus NCBI
- CP1Sc35455C6Ar7spl\_Arachnodes\_splendidus\_NCBI
- CP1Sc35455C6Ar7mic\_Arachnodes\_micheli NCBI
- CP1Sc35455C6Ar7glo\_Arachnodes\_globuloides NCBI
- CP1Sc35455C6Ar7emm\_Arachnodes\_emmae NCBI
- CP1Sc35455C6Ar7MTM2009\_11\_Arachnodes\_MTM2009\_NCBI
- CP1Sc35455C6Ar7sic\_Arachnodes\_sicardi NCBI
- CP1Sc35455C6Ar7onth7dia\_Ontherus\_diabolicus NCBI
- CP1Sc35455C6Gy7pum\_Gyronotus\_pumilus NCBI
- CP1Sc35455Tr7dgi1\_Trichillum\_dgi1 NCBI
- CP1Sc35455C6Bo7cor\_Boletoscapter\_cornutus\_NCBI
- CP1Sc35455Pe7dgi1\_Pedaria\_dgi1 NCBI
- CP1Sc35455Pe7CL52009b\_Pedaria\_CLS2009b\_NCBI
- CP1Sc35455Pe7CL52009a\_Pedaria\_CLS2009a\_NCBI
- CP1Sc35455De7int\_Demarziella\_interrupta\_NCBI
- CP1Sc35455C6Ar7r1\_Amphistomus\_rispiculatus\_NCBI
- CP1Sc35455C6Am7com\_Amphistomus\_complanatus\_NCBI
- CP1Sc35455C6Co7hem\_Coproecus\_hemisphaericus NCBI
- CP1Sc35455C6Ap7dgi1\_Aptenocanthon\_dgi1 NCBI
- CP1Sc35455C6Di7nig\_Diorygopyx\_niger NCBI
- CP1Sc35455C6Di7inc\_Diorygopyx\_incomptus\_NCBI
- CP1Sc35455C6Di7tib\_Diorygopyx\_tibialis NCBI
- CP1Sc35455C6Di7sim\_Diorygopyx\_simplicilunus\_NCBI
- CP1Sc35455C6Sa7squ\_Saphobius\_squamulosus NCBI
- CP1Sc35455C6Sa7set\_Saphobius\_setosus NCBI
- CP1Sc35455Pa7sim\_Paronthobium\_simplex NCBI
- CP1Sc35455Ano7tib\_Anonthobium\_fibiale NCBI
- CP1Sc35455C6Pse7dgi1\_Pseudonthobium\_dgi1 NCBI
- CP1Sc35455C6Iq7fas\_Iqnambia\_fasciculata NCBI
- CP1Sc35455C6Pse7frra\_Pseudonthobium\_fracticolloides\_NCBI
- CP1Sc35455C6on7dgi1\_Onthobium\_dgi1 NCBI
- CP1Sc35455C6on7coo\_Onthobium\_cooki NCBI
- CP1Sc35455C6Ps7BMNH679763\_Pseudignambia\_BMNH679763\_NCBI
- CP1Sc35455C6Ps7dgi1\_Pseudignambia\_dgi1 NCBI
- CP1Sc35455C6Ps7dgi2\_Pseudignambia\_dgi2 NCBI
- CP1Sc35455C6Le7bid\_Lepanus\_bidentatus\_NCBI
- CP1Sc35455C6Le7pol\_Lepanus\_politus NCBI
- CP1Sc35455C6Le7nit\_Lepanus\_nitidus NCBI
- CP1Sc35455C6Le7ust\_Lepanus\_ustulatus NCBI
- CP1Sc35455C6Can7cas\_Canthonosoma\_castelnaui NCBI
- CP1Sc35455C6Ce7arm\_Cephalodesmius\_armiger NCBI
- CP1Sc35455C6Ce7qua\_Cephalodesmius\_quadridens\_NCBI
- CP1Sc35455C6Mo7cur\_Monoplistes\_curvipes\_NCBI
- CP1Sc35455C6Le7gla\_Lepanus\_glaber NCBI
- CP1Sc35455C6Te7lae\_Temnoplectron\_laeve NCBI
- CP1Sc35455C6Te7bor\_Temnoplectron\_bornemisszai NCBI
- CP1Sc35455C6Te7maj\_Temnoplectron\_major NCBI
- CP1Sc35455C6Te7bou\_Temnoplectron\_boucomonti NCBI
- CP1Sc35455C6Te7fin\_Temnoplectron\_finnigani NCBI
- CP1Sc35455C6Te7mon\_Temnoplectron\_monteithi NCBI
- CP1Sc35455C6Te7inv\_Temnoplectron\_involucrae NCBI
- CP1Sc35455C6Te7sub\_Temnoplectron\_subvolitans\_NCBI
- CP1Sc35455C6Te7coo\_Temnoplectron\_cooki NCBI
- CP1Sc35455C6Te7dis\_Temnoplectron\_disruptum NCBI
- CP1Sc35455C6Te7pol\_Temnoplectron\_politulum NCBI
- CP1Sc35455C6Te7aen\_Temnoplectron\_aeneopiceum NCBI
- CP1Sc35455C6C17bac\_Circellium\_bacchus NCBI
- CP1Sc35455C6H7and\_Heliocopsis\_andersoni NCBI
- CP1Sc35455C6H7ham\_Heliocopsis\_hamdryas NCBI
- CP1Sc35455S6Sc7dgi1\_Scarabaeus\_dgi1 NCBI
- CP1Sc35455Pa7dgi1\_Pachysoma\_dgi1 NCBI
- CP1Sc35455Pa7aes\_Pachysoma\_aesculapius NCBI
- CP1Sc35455Pa7ben\_Pachysoma\_bennigseni NCBI
- CP1Sc35455Pa7end\_Pachysoma\_endroeydi NCBI
- CP1Sc35455Pa7gle\_Pachysoma\_glentoni NCBI
- CP1Sc35455Pa7hip\_Pachysoma\_hippocrates NCBI
- CP1Sc35455Pa7gar\_Pachysoma\_gariepinus NCBI
- CP1Sc35455Pa7den\_Pachysoma\_denticollis NCBI
- CP1Sc35455Pa7fit\_Pachysoma\_fitzsimonsi NCBI
- CP1Sc35455Pa7sch\_Pachysoma\_schinzi NCBI
- CP1Sc35455Pa7str\_Pachysoma\_striatus NCBI
- CP1Sc35455S6Kh7sub\_Kheper\_subaeneus NCBI
- CP1Sc35455S6Kh7bon\_Kheper\_bonellii NCBI
- CP1Sc35455S6Kh7nig\_Kheper\_nigroaeneus\_NCBI
- CP1Sc35455S6Sc7rad\_Scarabaeus\_radama NCBI
- CP1Sc35455S6Sc7gor\_Scarabaeus\_goryi NCBI
- CP1Sc35455S6Sc7vie\_Scarabaeus\_viettei NCBI
- CP1Sc35455S6Sc7sat\_Scarabaeus\_satyris NCBI
- CP1Sc35455S6Sc7zam\_Scarabaeus\_zambezianus NCBI



-XX-----X-----CP1Sc35455Ne7pro\_Neateuchus\_proboscideus\_NCBI  
-XX-----CP1Sc35455Pa7rot\_Pachysoma\_rotundigenus\_NCBI  
-XX-----CP1Sc35455Pa7rod\_Pachysoma\_rodriguezii\_NCBI  
-XX-----X-----CP1Sc35455S6Sc7wes\_Scarabaeus\_westwoodi\_NCBI  
-XX-----X-----CP1Sc35455S6Sc7rus\_Scarabaeus\_rusticus\_NCBI  
-XX-----X-----CP1Sc35455S6Sc7rug\_Scarabaeus\_rugosus\_NCBI  
-XX-----X-----X-----CP1Sc35455S6Sc7Sik2015\_Scarabaeus\_Sik2015\_NCBI  
-XX-----X-----X-----CP1Sc35455S6Sc7gal\_Scarabaeus\_galenus\_NCBI  
-XX-----X-----CP1Sc35455S6Sc7boh\_Scarabaeus\_bohemani\_NCBI  
-XX-----X-----CP1Sc35455S6Sc7fla\_Scarabaeus\_flavicornis\_NCBI  
-X-----X-----CP1Sc35455S6Sc7SM2012\_Scarabaeus\_SM2012\_NCBI  
-XX-----X-----CP1Sc35455S6Sc7rub\_Scarabaeus\_rubrhipennis\_NCBI  
-X-----X-----XXX CP1Sc35455S6Dr7cos\_Drepanopodus\_costatus\_NCBI  
-XX-----X-----CP1Sc35455S6Dr7pro\_Drepanopodus\_proximus\_NCBI  
-XX-----X-----CP1Sc35455Pa7val\_Pachysoma\_valeflorae\_NCBI  
-XX-----X-----XXX CP1Sc35455S6Pa7fem\_Pachylomerus\_femoralis\_NCBI  
-XX-----X-----CP1Sc35455S6Pa7ada\_Scarabaeus\_adamastor\_NCBI  
-XX-----X-----X-----CP1Sc35455S6Sc7thp\_Scarabaeus\_hippias\_NCBI  
-XX-----X-----CP1Sc35455S6Sc7cic\_Scarabaeus\_cicatricosus\_NCBI  
-XXX-----CP1Sc35455S6Sc7sac\_Scarabaeus\_sacer\_NCBI  
-XX-----CP1Sc35455S6Sc7piu\_Scarabaeus\_pius\_NCBI  
-XX-----CP1Sc35455S6Sc7thp\_Scarabaeus\_thphon\_NCBI  
-X-----X-----CP1Sc35455S6Sc7SM2012\_1\_Scarabaeus\_SM2012\_NCBI  
-XX-----X-----XXX CP1Sc35455S6Sc7bri\_Scarabaeus\_brittoni\_NCBI  
-X-----X-----CP1Sc35455Anon7fre\_Anonychonitis\_freyi\_NCBI  
-XX-----X-----CP1Sc35455Ch7hun\_Cheironitis\_hungaricus\_NCBI  
-X-----X-----X-----CP1Sc35455Ch7sca\_Cheironitis\_scabrosus\_NCBI  
-X-----X-----X-----CP1Sc35455Ch7on\_Cheironitis\_hoplosternus\_NCBI  
XXXXXXXXXXXXXXXXX X CP1Sc35455Eu6Eu7car\_Cheironitis\_hoplosternus\_Scarab.idba.15\_MERGED\_MMG\_ANNOT\_FROM\_BARCODE  
-XX-----X-----CP1Sc35455On7bel\_Onitis\_belialii\_NCBI  
-X-----X-----CP1Sc35455On7sub\_Onitis\_subopacus\_NCBI  
XXXXXXXXXXXXXXXXX X CP1Sc35455On7fal\_Onitis\_falcatus\_CS.idba.22\_MERGED\_MMG\_ANNOT\_FROM\_BARCODE  
-XXXX-----CP1Sc3\_Scarabaeoidea\_sp7\_CS.idba.87\_MMG\_ANNOT\_FROM\_TREE  
XXXXXXXXXXXXXXXXX X CP1Sc35455On7ale\_Onitis\_alexis\_Scarab.idba.9\_MMG\_ANNOT\_FROM\_BARCODE  
XXXXXXXXXXXXXXXXX X CP1Sc35455On7ale\_Onitis\_alexis\_CS.idba.60\_MERGED\_MMG\_ANNOT\_FROM\_BARCODE  
XXXXXXXXXXXXXXXXX XXX CP1Sc35455Het7cas\_Heteronitis\_castelnaui\_CS.idba.56\_MERGED\_MMG\_ANNOT\_FROM\_BARCODE  
XXXXXXXXXXXXXXXXX X CP1Sc35455Bu7bub\_Bubas\_bubalus\_CS.idba.14\_MERGED\_MMG\_ANNOT\_FROM\_BARCODE  
XXXXXXXXXXXXXXXXX X CP1Sc35455Bu7bis\_Bubas\_bison\_CS.idba.2\_MERGED\_MMG\_ANNOT\_FROM\_BARCODE  
-XX-----XXX CP1Sc35455On7ful\_Onitis\_fulgidus\_CS.idba.62\_MERGED\_MMG\_ANNOT\_FROM\_BARCODE  
-X-----X-----CP1Sc35455On7ion\_Onitis\_ion\_NCBI  
XXXXXXXXXXXXXXXXX X CP1Sc35455On7SM2012\_Onitis\_SM2012\_NCBI  
-XX-----CP1Sc35455On7caf\_Onitis\_caffer\_CS.idba.6\_MERGED\_MMG\_ANNOT\_FROM\_BARCODE  
-XX-----CP1Sc35455Ma7BMNH679805\_Macroderes\_BMNH679805\_NCBI  
-X-----X-----CP1Sc35455Xi7\_Xinidium\_sp\_JX412829  
-X-----X-----CP1Sc35455Xi7den\_Xinidium\_dentilabris\_NCBI  
-X-----X-----CP1Sc35455Xi7dew\_Xinidium\_dewitzii\_NCBI  
-X-----X-----CP1Sc35455C6Dw7med\_Dwesasilvasedis\_medinae\_NCBI  
-X-----X-----CP1Sc35455Ma7min\_Macroderes\_minutus\_NCBI  
-X-----X-----CP1Sc35455Ma7mil\_Macroderes\_milans NCBI  
-X-----X-----CP1Sc35455Ma7CLS2009\_Macroderes\_CLS2009\_NCBI  
-X-----X-----CP1Sc35455Ma7amp\_Macroderes\_amplior\_NCBI  
-X-----X-----X-----CP1Sc35455Ma7dgil\_Macroderes\_dgil\_NCBI  
-X-----X-----CP1Sc35455C6Py7kri\_Pycnapanelus\_krikkeni\_NCBI  
-X-----X-----XXX CP1Sc35455S16Ne7for\_Neosisyphus\_fortuitus\_NCBI  
-X-----X-----CP1Sc35455S16Ne7SM2012\_Neosisyphus\_SM2012\_NCBI  
-X-----X-----X-----CP1Sc35455S16S17gaz\_Sisyphus\_gazanus\_NCBI  
-X-----X-----X-----CP1Sc35455S16Ne7con\_Sisyphus\_confrater\_NCBI  
-X-----X-----X-----CP1Sc35455S16S17sem\_Sisyphus\_seminulus\_NCBI  
-X-----X-----X-----CP1Sc35455S16Ne7mir\_Neosisyphus\_mirabilis\_NCBI  
-XXX-----CP1Sc35455S16S17sch\_Sisyphus\_schaefferi\_NCBI  
-X-----X-----X-----CP1Sc35455S16S17cri\_Sisyphus\_crispatus\_NCBI  
-X-----X-----XXX CP1Sc35455S16S17fac\_Sisyphus\_faciculatus\_NCBI  
-X-----X-----CP1Sc35455On7SM2012\_Onthophagus\_SM2012\_NCBI  
-X-----X-----CP1Sc35455On7sig\_Onthophagus\_signatus\_NCBI  
XXXXXXXXXXXXXXXXX X CP1Sc35455D17gaz\_Digitonthophagus\_gazella\_Scarab.idba.8\_MERGED\_MMG\_ANNOT\_FROM\_BARCODE  
XXXXXXXXXXXXXXXXX CP1Sc35455On7bon\_Onthophagus\_bonatus\_CS.idba.4\_MMG\_ANNOT\_FROM\_BARCODE  
XXXXXXXXXXXXXXXXX CP1Sc35455Ph7sma\_Phalops\_smaragdinus\_CS.idba.38\_MMG\_ANNOT\_FROM\_BARCODE  
-X-----X-----CP1Sc35455Pr7sap\_Proagoderus\_sappharinus\_NCBI  
XXXXXXXXXXXXXXXXX XXX CP1Sc35455Ph7ard\_Phalops\_ardea\_CS.idba.8\_MERGED\_MMG\_ANNOT\_FROM\_BARCODE  
XXXXXXXXXXXX CP1Sc35455Ph7bar\_Phalops\_barbicornis\_Scarab.idba.21\_MMG\_ANNOT\_FROM\_BARCODE  
-X-----X-----CP1Sc35455Ph7ruf\_Phalops\_rufosignatus\_NCBI  
-X-----X-----X-----CP1Sc35455On7ran\_Onthophagus\_rangifer\_NCBI  
-X-----X-----CP1Sc35455On7pla\_Oniticellus\_planatus\_NCBI  
-XXXXXXXXXXXXXXXXX CP1Sc35455On7lat\_Onthophagus\_laticollis\_Scarab.idba.13\_MERGED\_MMG\_ANNOT\_FROM\_BARCODE  
XXXXXXXXXXXXXXXXX XXX CP1Sc35455Pr7bic\_Proagoderus\_bicallosus\_CS.idba.3\_MERGED\_MMG\_ANNOT\_FROM\_BARCODE  
XXXXXXXXXXXXXXXXX X CP1Sc35455Pr7sch\_Proagoderus\_schwani CS.idba.12\_MERGED\_MMG\_ANNOT\_FROM\_BARCODE  
-X-----X-----CP1Sc35455Pr7aci\_Proagoderus\_aciculatus\_NCBI  
-XX-----CP1Sc35455On7lan\_Onthophagus\_lanista\_NCBI  
-X-----X-----CP1Sc35455On7ter\_Onthophagus\_tersidorsis\_NCBI  
XXXXXXXXXXXXXXXXX CP1Sc35455On7apu\_Onthophagus\_aputnksinus\_Scarab.idba.5\_MMG\_ANNOT\_FROM\_BARCODE  
-X-----X-----CP1Sc35455On7ele\_Onthophagus\_elegans\_NCBI  
XXXXXXXXXXXXXXXXX XXX CP1Sc35455D17dia\_Onthophagus\_diabolicus\_Scarab.idba.18\_MERGED\_MMG\_ANNOT\_FROM\_BARCODE  
XXXXXXXXXXXXXXXXX CP1Sc3\_Scarabaeoidea\_sp1\_CS.idba.30\_MMG\_ANNOT\_FROM\_TREE  
XXXXXXXXXXXXXXXXX CP1Sc35455On7yuk\_Onthophagus\_yukae\_Scarab.idba.12\_MMG\_ANNOT\_FROM\_BARCODE  
-XX-----X-X-X-----CP1Sc35455Para7pen\_Parascatonomus\_penicillatus\_NCBI  
XXXXXXXXXXXXXXXXX X CP1Sc35455On7sem\_Onthophagus\_semiaureus\_CS.idba.51\_MERGED\_MMG\_ANNOT\_FROM\_BARCODE  
XXXXXXXXXXXXXXXXX CP1Sc35455 Scarabaeidae\_sp\_Scarab.idba.25\_MMG\_ANNOT\_FROM\_TREE  
XXXXXXXXXXXXXXXXX CP1Sc35455On7tri\_Onthophagus\_tricornis\_CS.idba.33\_MMG\_ANNOT\_FROM\_BARCODE  
-X-----X-----CP1Sc35455Se7sen\_Serrophorus\_seniculus\_NCBI  
-XXXX-----CP1Sc3\_Scarabaeoidea\_sp6\_CS.idba.86\_MMG\_ANNOT\_FROM\_TREE  
XXXXXXXXXXXXXXXXX XXX CP1Sc35455T17sar\_Tinocellus\_sarawacus\_CS.idba.21\_MERGED\_MMG\_ANNOT\_FROM\_BARCODE  
-X-----X-----CP1Sc35455Euo7tri\_Euoniticellus\_trianulatus\_NCBI  
-XXXXXXXXXXXXXXXXX XXX CP1Sc35455Euo7ful\_Euoniticellus\_fulvus\_Scarab.idba.0\_MERGED\_MMG\_ANNOT\_FROM\_BARCODE  
-X-----X-----CP1Sc35455Euo7afr\_Euoniticellus\_africanus\_NCBI  
XXXXXXXXXXXXXXXXX XXX CP1Sc35455Euo7int\_Euoniticellus\_intermedius\_CS.idba.5\_MERGED\_MMG\_ANNOT\_FROM\_BARCODE  
-X-----X-----CP1Sc35455Dr7lat\_Drepanocerus\_laticollis\_NCBI  
-XX-----CP1Sc35455Euo7pal\_Euoniticellus\_pallipes\_NCBI  
XXXXXXXXXXXXXXXXX X CP1Sc35455Tra7dim\_Tragiscus\_dimidiatus\_Scarab.idba.4\_MERGED\_MMG\_ANNOT\_FROM\_BARCODE  
-X-----X-----XXX CP1Sc35455Dr7bec\_Drepanocerus\_bechynei\_NCBI  
XXXXXXXXXXXXXXXXX CP1Sc35455Sc7rba\_Scantodera\_phadamiensis\_Scarab.idba.10\_MMG\_ANNOT\_FROM\_BARCODE

XXXXXXXXXXXXXXXXX---X CP1Sc354550ni7egr\_Oniticeilus\_egregius CS.idba.9 MERGED\_MMG\_ANNOT\_FROM\_BARCODE  
-----XXXXX--- CP1Sc35455 Scarabaeidae\_sp\_Scarab.idba.32\_MMG\_ANNOT\_FROM\_TREE  
XXXXXXXXXXXXXXXXX---X CP1Sc35455Dr7kir\_Drepanocerus\_kirbyi CS.idba.15 MERGED\_MMG\_ANNOT\_FROM\_BARCODE  
XXXXXXXXXXXXXXXXX--- CP1Sc35455Li7mil\_Liatongus\_militaris CS.idba.28\_MMG\_ANNOT\_FROM\_BARCODE  
-XXXXXXXXX-X---X CP1Sc35455Li7mil\_Liatongus\_militaris Scarab.idba.22\_MERGED\_MMG\_ANNOT\_FROM\_BARCODE  
-X-----X-----X CP1Sc35455Cy7amb\_Cyptochirus\_ambiguus NCBI  
-X-----X-----X CP1Sc35455Li7ver\_Liatongus\_vertagus NCBI  
-X-----X-----X CP1Sc35455Ti7BMMH67699\_Tiniocellus\_BMMH67699 NCBI  
XXXXXXXXXXXXXXXXX--- CP1Sc35455Ti7spi\_Tiniocellus\_spinipes CS.idba.36\_MMG\_ANNOT\_FROM\_BARCODE  
-X-----X-X---X CP1Sc35455Ti7spi\_Tiniocellus\_spinipes NCBI  
-----X-X----- CP1Sc35455Hel7min\_Helictopleurus\_minutus NCBI  
-X-----X CP1Sc35455Hel7MTM2009\_11\_Helictopleurus\_MTM2009 NCBI  
-X-----X CP1Sc35455Hel7MTM2009\_2\_Helictopleurus\_MTM2009 NCBI  
-X-----X CP1Sc35455Hel7MTM2009\_3\_Helictopleurus\_MTM2009 NCBI  
-XX-----X-X-X--- CP1Sc35455Hel7neo\_Helictopleurus\_neoampliocollis NCBI  
-X-----X-X--- CP1Sc35455Hel7cri\_Helictopleurus\_cribricollis NCBI  
-XX-----X-X-X--- CP1Sc35455Hel7per\_Helictopleurus\_perrieri NCBI  
-X-----X-X-X--- CP1Sc35455Hel7uni\_Helictopleurus\_unifasciatus NCBI  
-X-----X-X-X--- CP1Sc35455Hel7MTM2009\_Helictopleurus\_MTM2009 NCBI  
-XXXXXXXXXXXXX--- CP1Sc35455Hel7qua\_Helictopleurus\_quadripunctatus CS.idba.61\_MMG\_ANNOT\_FROM\_BARCODE  
XXXXX---X-XX---XXX CP1Sc35455Hel7qua\_Helictopleurus\_quadripunctatus CS.idba.79\_MERGED\_MMG\_ANNOT\_FROM\_BARCODE  
-XX-----X-X-X--- CP1Sc35455Hel7ful\_Helictopleurus\_fulgens NCBI  
-X-----XX---X CP1Sc35455Hel7MTM2009\_1\_Helictopleurus\_MTM2009 NCBI  
-XX-----X-X-X--- CP1Sc35455Hel7spl\_Helictopleurus\_splendidicollis NCBI  
-X-----X CP1Sc35455Hel7MTM2009\_4\_Helictopleurus\_MTM2009 NCBI  
-X-----X CP1Sc35455Hel7MTM2009\_5\_Helictopleurus\_MTM2009 NCBI  
-XX-----X-X-X--- CP1Sc35455Hel7nic\_Helictopleurus\_nicollei NCBI  
-XX-----X-X-X--- CP1Sc35455Hel7mar\_Helictopleurus\_marsyas NCBI  
-X-----X-X-X--- CP1Sc35455Hel7cor\_Helictopleurus\_corruscus NCBI  
-XX-----X-X-X--- CP1Sc35455Hel7sin\_Helictopleurus\_siniaticornis NCBI  
-XX-----X-X-X--- CP1Sc35455Hel7gia\_Helictopleurus\_giganteus NCBI  
-X-----X CP1Sc35455Hel7MTM2009\_6\_Helictopleurus\_MTM2009 NCBI  
-XX-----X-X-X--- CP1Sc35455Hel7fis\_Helictopleurus\_fissicollis NCBI  
-XX-----X-X-X--- CP1Sc35455Hel7obs\_Helictopleurus\_obscurus NCBI  
-X-----X-X-X--- CP1Sc35455Hel7mul\_Helictopleurus\_multimaculatus NCBI  
-X-----X-----X CP1Sc35455Hel7fas\_Helictopleurus\_fasciolatus NCBI  
-X-----X-----X CP1Sc35455Hel7MTM2009\_7\_Helictopleurus\_MTM2009 NCBI  
-XX-----X-X-X--- CP1Sc35455Hel7pol\_Helictopleurus\_politicollis NCBI  
-XX-----X-X-X-X--- CP1Sc35455Hel7rud\_Helictopleurus\_rudicollis NCBI  
-X-----X-X-X--- CP1Sc35455Hel7neu\_Helictopleurus\_neuber NCBI  
-X-----X-X-X--- CP1Sc35455Hete7sic\_Heterosyphus\_sicardi NCBI  
-X-----X-X-X--- CP1Sc35455Hel7car\_Helictopleurus\_carbonarius NCBI  
-X-----X-X-X-X--- CP1Sc35455Hel7fun\_Helictopleurus\_fungicola NCBI  
-X-----X CP1Sc35455Hel7MTM2009\_8\_Helictopleurus\_MTM2009 NCBI  
-X-----XX---X CP1Sc35455Hel7669916\_Helictopleurus\_669916 NCBI  
-XX-----X-X-X--- CP1Sc35455Hel7sem\_Helictopleurus\_semivirens NCBI  
-X-----X-X-X--- CP1Sc35455Hel7ste\_Helictopleurus\_steineri NCBI  
-X-----X-----X CP1Sc35455Hel7MTM2009\_9\_Helictopleurus\_MTM2009 NCBI  
-X-----X-----X CP1Sc35455Hel7dor\_Helictopleurus\_dorbignyi NCBI  
-X-----X-----X CP1Sc35455Hel7MTM2009\_10\_Helictopleurus\_MTM2009 NCBI  
-X-----X-----X CP1Sc354550nt7hin\_Onthophagus\_hinnulus NCBI  
-X-----X-X-X--- CP1Sc354550nt7dep\_Onthophagus\_depressus NCBI  
-XX-----X-----X CP1Sc354550nt7pun\_Onthophagus\_punctatus NCBI  
-X-----XX---X CP1Sc354550nt7BMMH676993\_Onthophagus\_BMMH676993 NCBI  
-----XX----- CP1Sc35455Ca7sor\_Caccobius\_sordidus NCBI  
-X-----XX--- CP1Sc354550nt7gib\_Onthophagus\_gibbulus NCBI  
-XX-----X-----X CP1Sc354550nt7nut\_Onthophagus\_nutans NCBI  
XXXXXXXXXXXXXXXXX--- CP1Sc354550nt7coe\_Onthophagus\_coenobita CS.idba.24\_MERGED\_MMG\_ANNOT\_FROM\_TREE  
XXXXXXXXXXXXXXXXX---X CP1Sc354550nt7sim\_Onthophagus\_similis CS.idba.37\_MERGED\_MMG\_ANNOT\_FROM\_BARCODE  
-XX-----X-----X CP1Sc354550nt7fra\_Onthophagus\_fracticornis NCBI  
-XX-----X-----X CP1Sc354550nt7med\_Onthophagus\_medius NCBI  
-X-----XX---X CP1Sc354550nt7sty\_Onthophagus\_styly NCBI  
XXXXXXXXXXXXXXXXX--- CP1Sc354550nt7vac\_Onthophagus\_vacca CS.idba.55\_MERGED\_MMG\_ANNOT\_FROM\_BARCODE  
-X-----X-----X CP1Sc354550nt7opa\_Onthophagus\_opacicollis NCBI  
-XX-----X-----X CP1Sc354550nt7mer\_Onthophagus\_merdarius NCBI  
-XXX-----XX-X--- CP1Sc354550nt7nuc\_Onthophagus\_nuchicornis NCBI  
-X-----X-----X CP1Sc354550nt7fla\_Onthophagus\_flavimargo NCBI  
-X-----X-----X CP1Sc354550nt7int\_Onthophagus\_interstitialis NCBI  
XXXXXXX--- CP1Sc354550nt7car\_Onthophagus\_carbonarius CS.idba.75\_MMG\_ANNOT\_FROM\_BARCODE  
-XXXXXXXXXXXXXXXXX---X CP1Sc35455Eun7car\_Onthophagus\_carbonarius Scarab.idba.19\_MERGED\_MMG\_ANNOT\_FROM\_BARCODE  
-XXXXXXXXXXXXXXXXX--- CP1Sc35455Eun7car\_Onthophagus\_carbonarius CS.idba.71\_MMG\_ANNOT\_FROM\_BARCODE  
-X-----XX---X CP1Sc35455Eun7amy\_Eunthophagus\_amyntas NCBI  
XXXXXXXXXXXXXXXXX--- CP1Sc3 Scarabaeoidea\_sp2 CS.idba.40\_MMG\_ANNOT\_FROM\_TREE  
-X-----XX---X CP1Sc354550nt7BMMH677008\_Onthophagus\_BMMH677008 NCBI  
XXXXXXXXX--- CP1Sc354550nt7 Onthophagus\_cf.tragus\_Scarab.idba.31\_MMG\_ANNOT\_FROM\_BARCODE  
XXXXXXXXX--- CP1Sc354550nt7 Onthophagus\_cf.tragus\_Scarab.idba.27\_MMG\_ANNOT\_FROM\_BARCODE  
-X-----XX---X CP1Sc354550nt7BMM670919\_Onthophagus\_BM670919 NCBI  
-XXXXXXXXX--- CP1Sc354550nt7 Onthophagus\_sp\_CS.idba.73\_MMG\_ANNOT\_FROM\_BARCODE  
-X-----X-----X CP1Sc354550nt7syd\_Onthophagus\_sydneyensis NCBI  
-XX-----X-----X CP1Sc354550nt7hir\_Onthophagus\_hirtus NCBI  
-XX-----X-----X CP1Sc354550nt7mak\_Onthophagus\_maki NCBI  
XXXXXXXXXXXXXXXXX---X CP1Sc354550nt7ror\_Onthophagus\_rorarius CS.idba.1\_MERGED\_MMG\_ANNOT\_FROM\_BARCODE  
-XXXXXXXXX--- CP1Sc35455 Scarabaeidae\_sp\_Scarab.idba.26\_MMG\_ANNOT\_FROM\_TREE  
-XXXXXXXXX--- CP1Sc354550nt7vul\_Onthophagus\_vulpes CS.idba.67\_MMG\_ANNOT\_FROM\_BARCODE  
-X-----XXXXXXXXX---X CP1Sc354550nt7vul\_Onthophagus\_vulpes CS.idba.70\_MERGED\_MMG\_ANNOT\_FROM\_BARCODE  
XXXXXXXXXXXXXXXXX---X CP1Sc35455Hy7alc\_Hyalonthophagus\_alcyon CS.idba.42\_MERGED\_MMG\_ANNOT\_FROM\_BARCODE  
-X-----X-----X CP1Sc35455Hy7alc\_Hyalonthophagus\_alcyonides NCBI  
-X-X-----XX--- CP1Sc354550nt7alc\_Onthophagus\_alcyonides NCBI  
-X-----XX--- CP1Sc354550nt7ful\_Onthophagus\_fuliginosus NCBI  
XXXXXXXXXXXXXXXXX--- CP1Sc354550nt7 Onthophagus\_jeannelianus Scarab.idba.16\_MMG\_ANNOT\_FROM\_BARCODE  
XXXXXXXXXXXXXXXXX--- CP1Sc35455 Scarabaeidae\_sp\_Scarab.idba.11\_MMG\_ANNOT\_FROM\_TREE  
-XXXXXXXXXXXXXXXXX--- CP1Sc354550nt7fal\_Onthophagus\_falculatus CS.idba.32\_MMG\_ANNOT\_FROM\_BARCODE  
XXXXXXXXXXXXX--- CP1Sc354550nt7era\_Onthophagus\_erasiolicollis Scarab.idba.20\_MMG\_ANNOT\_FROM\_BARCODE  
-XX-----X-X--- CP1Sc354550nt7vert\_Onthophagus\_verticicornis NCBI  
-X-X-----XX--- CP1Sc354550nt7sug\_Onthophagus\_sugillatus NCBI  
-XXX-----X-----X CP1Sc354550nt7ova\_Onthophagus\_ovatus NCBI  
-X-----XX---X CP1Sc354550nt7BMMH676988\_Onthophagus\_BMMH676988 NCBI  
-XX-----X-----X CP1Sc354550nt7ruf\_Onthophagus\_ruficapillus NCBI  
-XX-----X-----X CP1Sc354550nt7gro\_Onthophagus\_grossepunctatus NCBI

Phylogenetic tree showing relationships between various species, primarily from the genus *Onthophagus*. The tree is rooted on the left and branches out to the right. Each node and branch is labeled with a species name and its corresponding accession number (e.g., CP1Sc354550nt7pul, CP1Sc354550nt7lem). The labels are arranged in a columnar format, with some species names truncated for brevity. The tree structure is complex, with many internal nodes and branches, indicating a large number of species being compared. The labels include various identifiers such as 'MMG\_ANNOT\_FROM\_BARCODE', 'MMG\_ANNOT\_FROM\_TREE', and 'MERGED\_MMG\_ANNOT\_FROM\_BARCODE', suggesting that the tree is based on multiple data sources or analyses. The species names are listed in a specific order, likely corresponding to the order of the tips in the tree. The tree shows a high degree of genetic differentiation among the species, with many distinct clusters and branches. The overall structure is a dense, bushy tree with many small branches and nodes, indicating a large number of species and a complex evolutionary history. The labels are in a standard font, and the tree is drawn with simple lines and dots to represent nodes and branches. The tree is oriented vertically, with the root at the top and the tips at the bottom. The labels are placed to the right of the tree, and some are indented to show their position relative to the branches. The tree is a clear representation of the genetic relationships between the species, and it provides a visual summary of the data. The labels are in a standard font, and the tree is drawn with simple lines and dots to represent nodes and branches. The tree is oriented vertically, with the root at the top and the tips at the bottom. The labels are placed to the right of the tree, and some are indented to show their position relative to the branches. The tree is a clear representation of the genetic relationships between the species, and it provides a visual summary of the data.

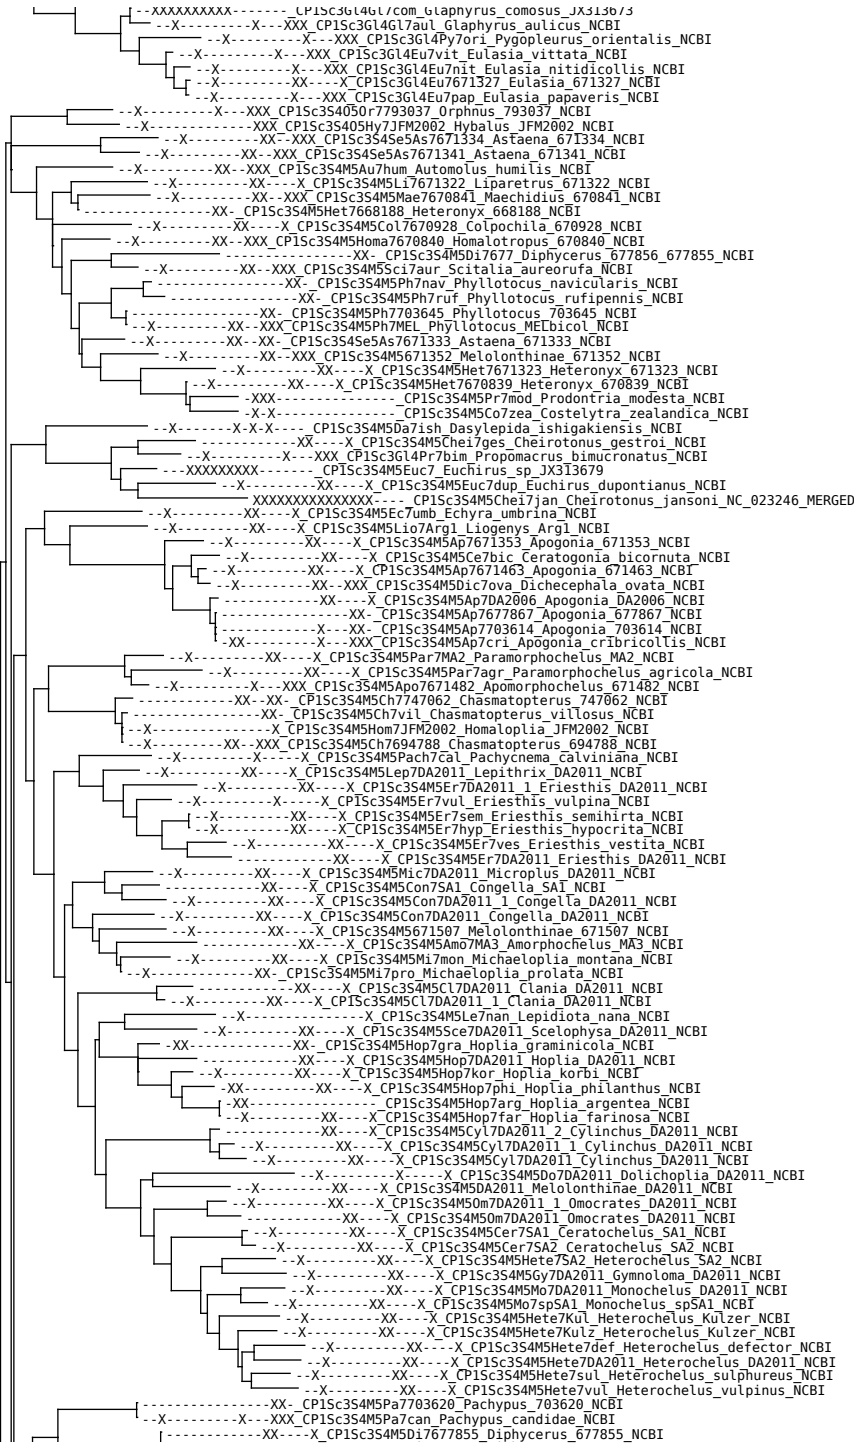

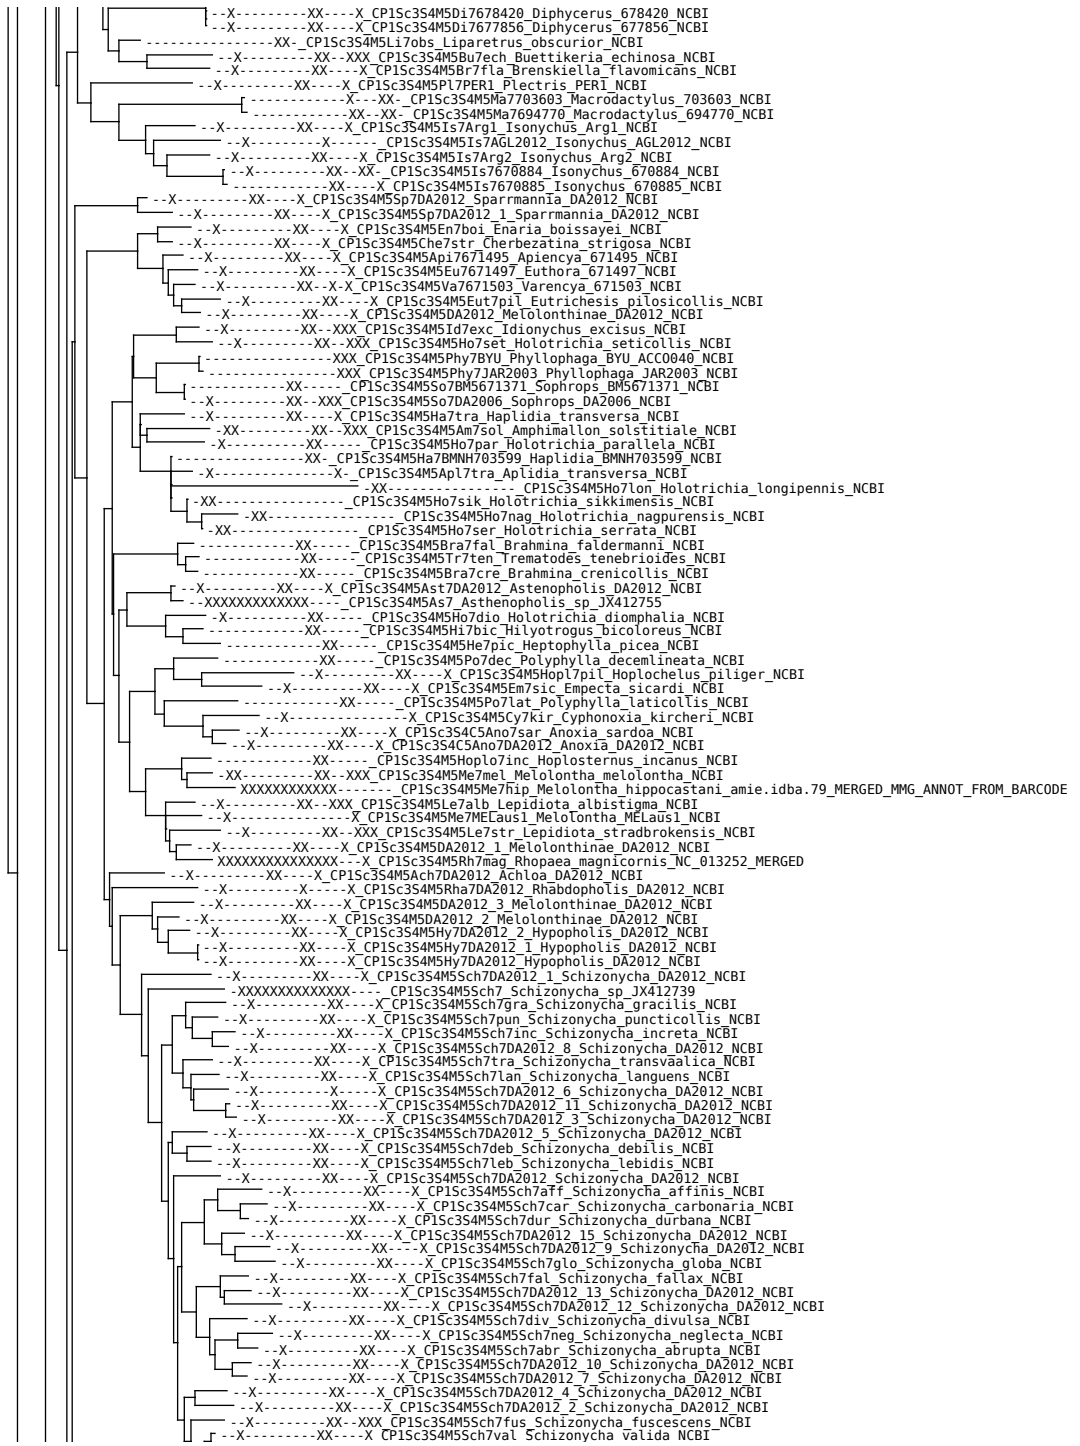

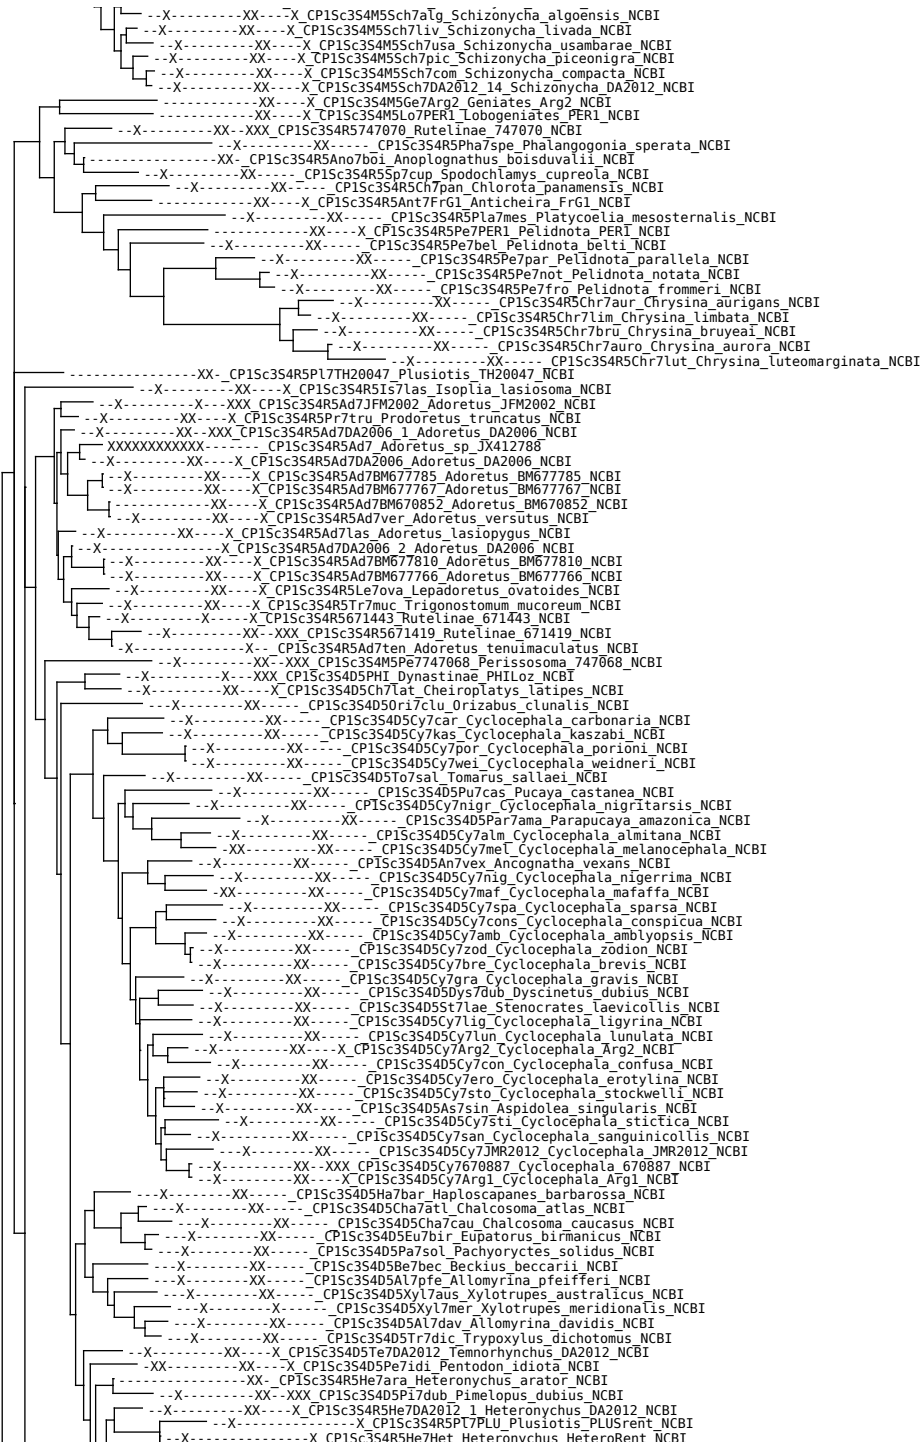

Phylogenetic tree showing relationships between various species, primarily from the genus *Anomala* and related genera. The tree is rooted on the left and branches out to the right. Species names are listed on the right side of the tree, often followed by their source (NCBI) or a specific identifier. The tree shows a complex branching pattern, with many species having multiple accessions (indicated by 'X' or 'XX') and some species being merged (indicated by 'MERGED'). The tree is highly branched, indicating a large number of species and their relationships. The species names are listed on the right side of the tree, often followed by their source (NCBI) or a specific identifier. The tree shows a complex branching pattern, with many species having multiple accessions (indicated by 'X' or 'XX') and some species being merged (indicated by 'MERGED').

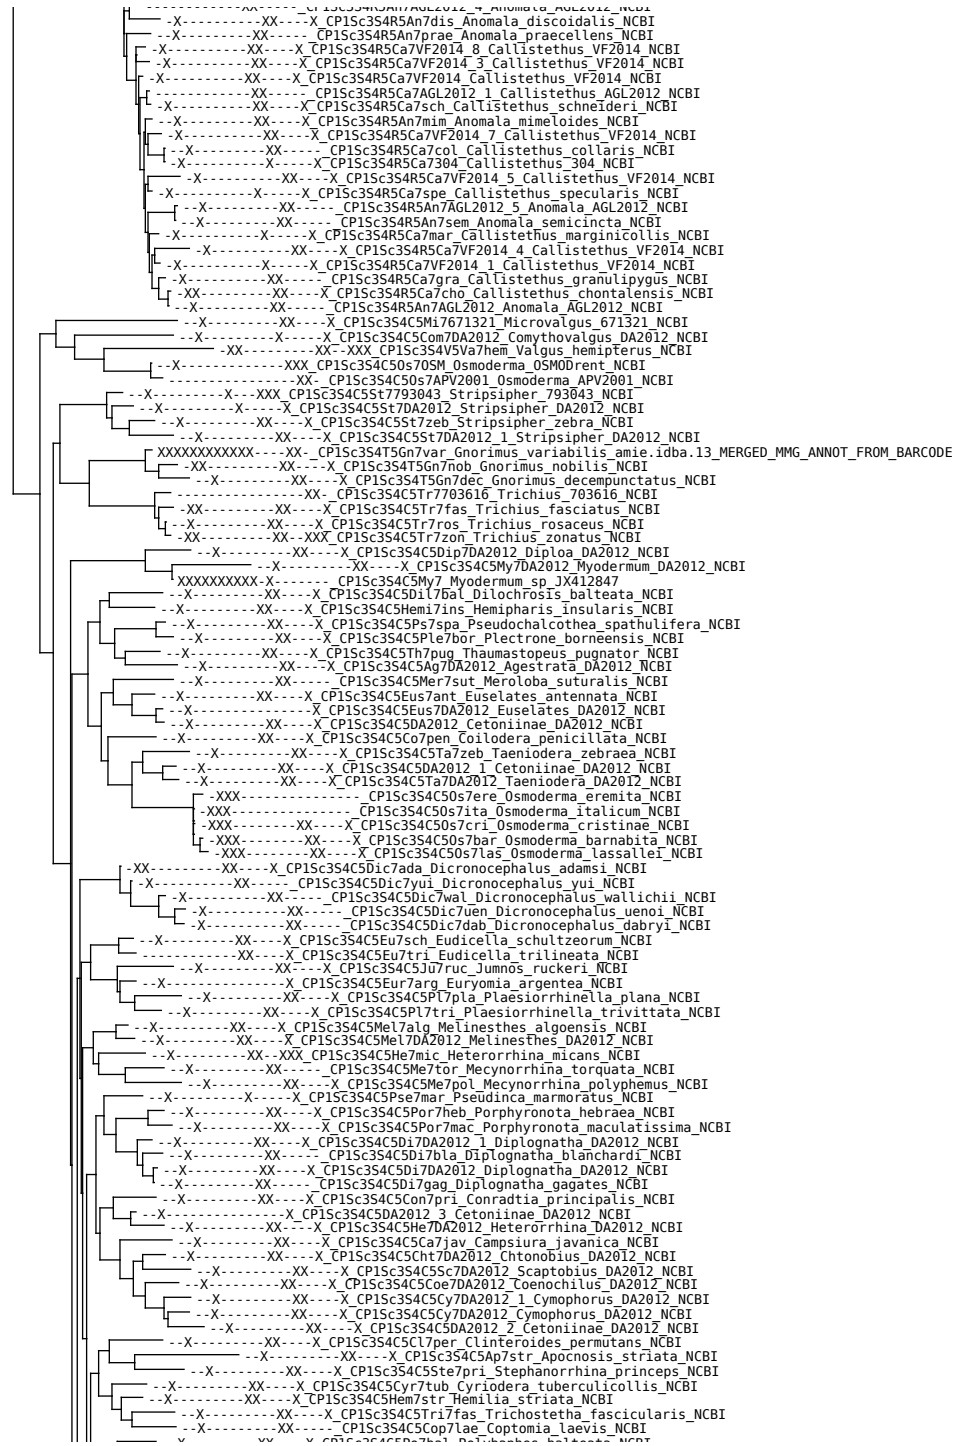



Phylogenetic tree showing relationships between various species, with taxonomic names and accession numbers listed on the right side. The tree is rooted on the left and branches out to the right. The species names are listed on the right side of the tree, with their corresponding accession numbers in parentheses. The tree is rooted on the left and branches out to the right. The species names are listed on the right side of the tree, with their corresponding accession numbers in parentheses. The tree is rooted on the left and branches out to the right. The species names are listed on the right side of the tree, with their corresponding accession numbers in parentheses.

CP1Sc354C5Cr0bat\_Polyopanes\_daiteata NCBI  
CP1Sc354C5Tro7hir\_Tropinota\_hirta NCBI  
CP1Sc354C5Tro7squ\_Tropinota\_squalida NCBI  
CP1Sc354C5G17hor\_Glycyphana\_horsfieldi NCBI  
CP1Sc354C5G17bin\_Glycyphana\_binotata NCBI  
CP1Sc354C5Cr7TJH2004\_Cremastocheilus\_TJH2004 NCBI  
CP1Sc354C5Ce7aur\_Cetonia\_aurata NCBI  
CP1Sc354C5Cot7mut\_Cotinis\_mutabilis NCBI  
CP1Sc354C5Te7mor\_Tephraea\_morosa NCBI  
CP1Sc354C5Te7dic\_Tephraea\_dichroa NCBI  
CP1Sc354C5Rha7aul\_Rhabdotis\_aulica NCBI  
CP1Sc354C5Atr7pla\_Atrichiana\_placida NCBI  
CP1Sc354C5D1s7cin\_Dischista\_cincta NCBI  
CP1Sc354C5Pa7DA2012\_Pachnoda\_DA2012 NCBI  
CP1Sc354C5Pa7tho\_Pachnoda\_thoracica NCBI  
CP1Sc354C5Pa7mar\_Pachnoda\_marginata NCBI  
CP1Sc354C5Pa7fas\_Pachnoda\_fasciata NCBI  
CP1Sc354C5Ph7umb\_Phoxomela\_umbrosa NCBI  
CP1Sc354C5In7cla\_Inca\_clathrata NCBI  
CP1Sc354C5Le7\_Leucocelis\_sp\_JX412740  
CP1Sc354C5Atr7niq\_Atrichelaphinis\_nigropunctulata NCBI  
CP1Sc354C5Atr7tia\_Atrichelaphinis\_tigrina NCBI  
CP1Sc354C5EL7irr\_Elaphinis\_irrorata NCBI  
CP1Sc354C5EL7del\_Elaphinis\_delagoensis NCBI  
CP1Sc354C5La7JFM2002\_Laeocelis\_JFM2002 NCBI  
CP1Sc354C5Le7ame\_Leucocelis\_amethystina NCBI  
CP1Sc354C5Le7hae\_Leucocelis\_haemorrhoidalis NCBI  
CP1Sc354C5Le7rub\_Leucocelis\_rubra NCBI  
CP1Sc354C5Ma7ama\_Mausoleopsis\_amabilis NCBI  
CP1Sc354C5Cyr7DA2012\_Cyrtothyrea\_DA2012 NCBI  
CP1Sc354C5N17DA2012\_Niphetophora\_DA2012 NCBI  
CP1Sc354C5Ox7fun\_Oxythyrea\_funesta NCBI  
CP1Sc354C5Ox7pan\_Oxythyrea\_pantherina NCBI  
CP1Sc354C5Cyr7tes\_Cyrtothyrea\_testaceoguttata NCBI  
CP1Sc354C5Le7TJH2004\_Leucocelis\_TJH2004 NCBI  
CP1Sc354C5Ox7cin\_Oxythyrea\_cinctella NCBI  
CP1Sc354C5Xe7lep\_Xeloma\_leprosa NCBI  
CP1Sc354C5Xe7tom\_Xeloma\_tomentosa NCBI  
CP1Sc354C5Ane7sim\_Anelaphinis\_simillima NCBI  
CP1Sc354C5Ae7DA2012\_Aethiessa\_DA2012 NCBI  
CP1Sc354C5Ae7f1o\_Aethiessa\_floralis NCBI  
CP1Sc354C5Sh7t7gra\_Heterocnemis\_graeca NCBI  
CP1Sc354C5Pr7him\_Protactia\_himalyana NCBI  
CP1Sc354C5Pr7bre\_Protactia\_brevitarsis NCBI  
CP1Sc354C5Pr7ori\_Protactia\_orientalis NCBI  
CP1Sc354C5Pr7aff\_Protactia\_affinis NCBI  
CP1Sc354C5Pr7mar\_Protactia\_marginicollis NCBI  
CP1Sc354C5Pr7fus\_Protactia\_fusca NCBI  
CP1Sc354C5Pr7sub\_Protactia\_subpilosa NCBI  
CP1Sc354C5Pr7tro\_Protactia\_trojana NCBI  
CP1Sc354C5Ne7sta\_Neptunides\_stanleyi NCBI  
CP1Sc354C5Pr7ung\_Protactia\_ungarica NCBI  
CP1Sc354C5Pr7lug\_Protactia\_lugubris NCBI  
CP1Sc354C5Pr7spe\_Protactia\_speciosissima NCBI  
CP1Sc354C5Pr7fie\_Protactia\_fieberi NCBI  
CP1Sc354C5Pr7mor\_Protactia\_morio NCBI  
CP1Sc354C5Pr7cup\_Protactia\_cuprea NCBI  
CP1Sc354C5Pr7ang\_Protactia\_angustata NCBI  
CP1Sc354C5Pr7vid\_Protactia\_vidua NCBI  
CP1Sc354C5Net7DA2012\_Netocia\_DA2012 NCBI  
CP1Sc354C5Ch7acu\_Chiloloba\_acuta NCBI  
CP1Sc354C5Ar7kol\_Argyropheges\_kolbei NCBI  
CP1Sc354C5Go7ori\_Goliatthus\_orientalis NCBI  
CP1Sc354C5Go7rot\_Goliatthus\_goliatthus NCBI  
CP1Sc354M5Phy7lor\_Phyllophaga\_lorencita NCBI  
CP1Sc354M5Phy7nev\_Phyllophaga\_nevermanni NCBI  
CP1Sc354M5Phy7sch\_Phyllophaga\_schizorhina NCBI  
CP1Sc354M5Phy7lar\_Phyllophaga\_larai NCBI  
CP1Sc354M5Phy7gua\_Phyllophaga\_guapiloides NCBI  
CP1Sc354M5Phy7rev\_Phyllophaga\_reventazona NCBI  
CP1Sc354M5Phy7set\_Phyllophaga\_setidorsis NCBI  
CP1Sc354M5Phy7AGL2012\_Phyllophaga\_AGL2012 NCBI  
CP1Sc354M5Phy7den\_Phyllophaga\_densata NCBI  
CP1Sc354M5Phy7lis\_Phyllophaga\_lissopyge NCBI  
CP1Sc354M5Phy7cho\_Phyllophaga\_choretega NCBI  
CP1Sc354M5Phy7bal\_Phyllophaga\_balia NCBI  
CP1Sc354M5Phy7prol\_Phyllophaga\_prolixa NCBI  
CP1Sc354M5Phy7hirs\_Phyllophaga\_hirsuta NCBI  
CP1Sc354M5Phy7aeq\_Phyllophaga\_aequata NCBI  
CP1Sc354M5Phy7MP2009\_Phyllophaga\_MP2009 NCBI  
CP1Sc354M5Phy7pse\_Phyllophaga\_pseudofloridana NCBI  
CP1Sc354M5Phy7pea\_Phyllophaga\_pearliae NCBI  
CP1Sc354M5Phy7pro\_Phyllophaga\_profunda NCBI  
CP1Sc354M5Phy7bip\_Phyllophaga\_bipartita NCBI  
CP1Sc354M5Phy7dra\_Phyllophaga\_drakii NCBI  
CP1Sc354M5Phy7ilil\_Phyllophaga\_ilicis NCBI  
CP1Sc354M5Phy7kno\_Phyllophaga\_knochi NCBI  
CP1Sc354M5Phy7neb\_Phyllophaga\_nebulosa NCBI  
CP1Sc354M5Phy7del\_Phyllophaga\_delata NCBI  
CP1Sc354M5Phy7hirc\_Phyllophaga\_hirticula NCBI  
CP1Sc354M5Phy7fra\_Phyllophaga\_fraterna NCBI  
CP1Sc354M5Phy7luc\_Phyllophaga\_luctuosa NCBI  
CP1Sc354M5Phy7for\_Phyllophaga\_forsteri NCBI  
CP1Sc354M5Phy7subt\_Phyllophaga\_subtonsa NCBI  
CP1Sc354M5Phy7fox\_Phyllophaga\_foxii NCBI  
CP1Sc354M5Phy7pat\_Phyllophaga\_paterno NCBI  
CP1Sc354M5Phy7hor\_Phyllophaga\_hornii NCBI  
CP1Sc354M5Phy7lod\_Phyllophaga\_lodingi NCBI  
CP1Sc354M5Phy7prui\_Phyllophaga\_pruiosa NCBI  
CP1Sc354Se5Cy7671406\_Cyrtocamenta\_671406 NCBI

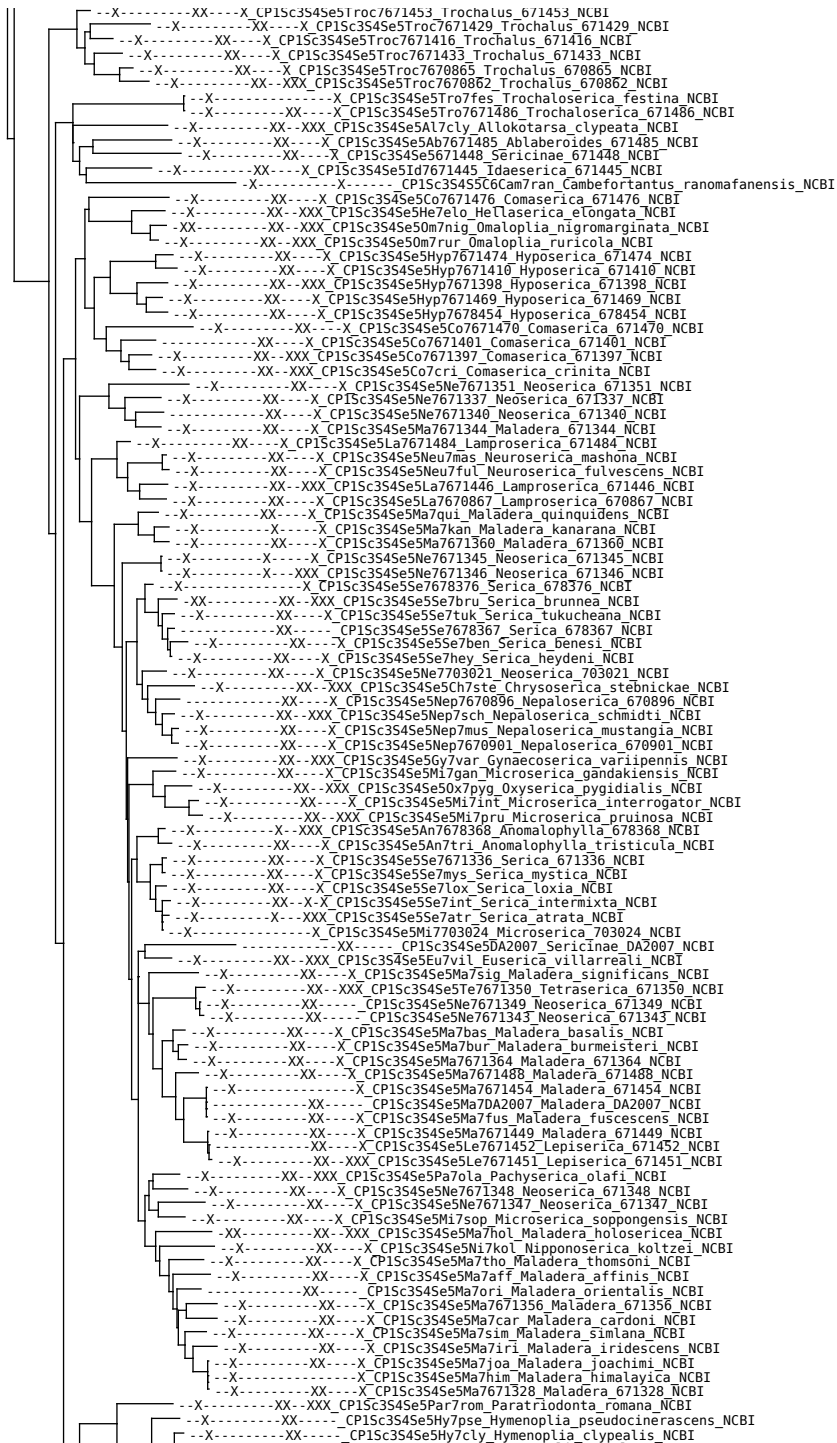

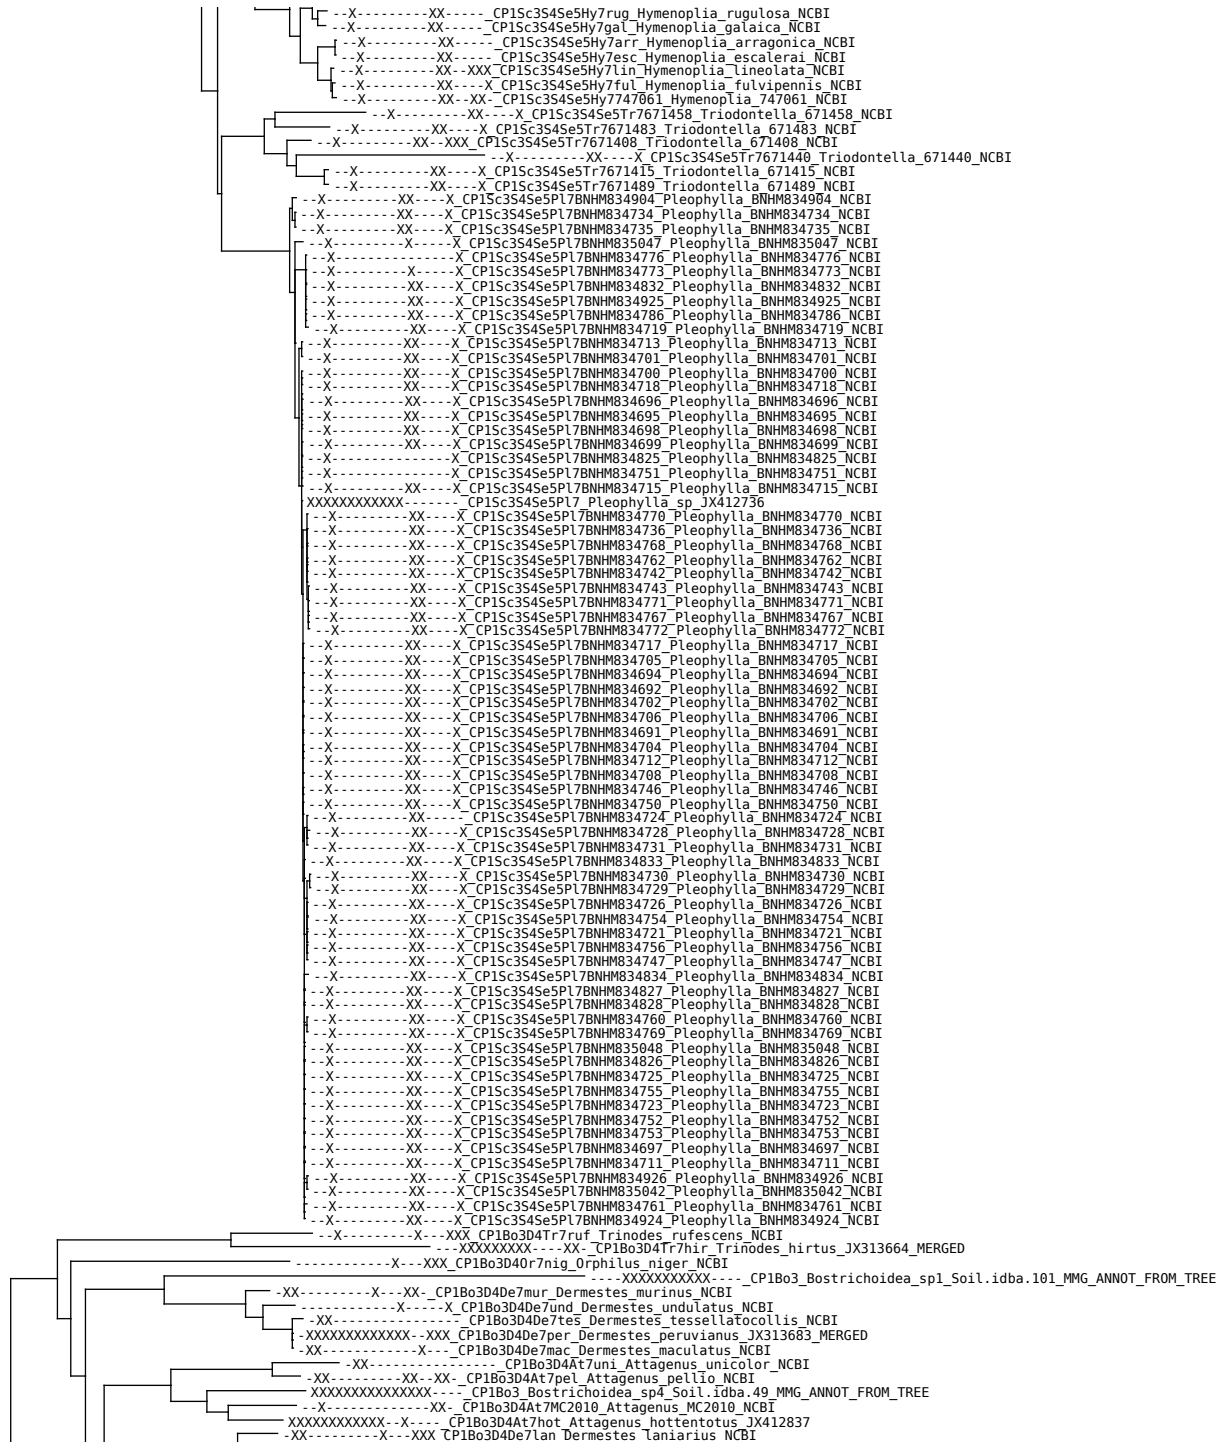

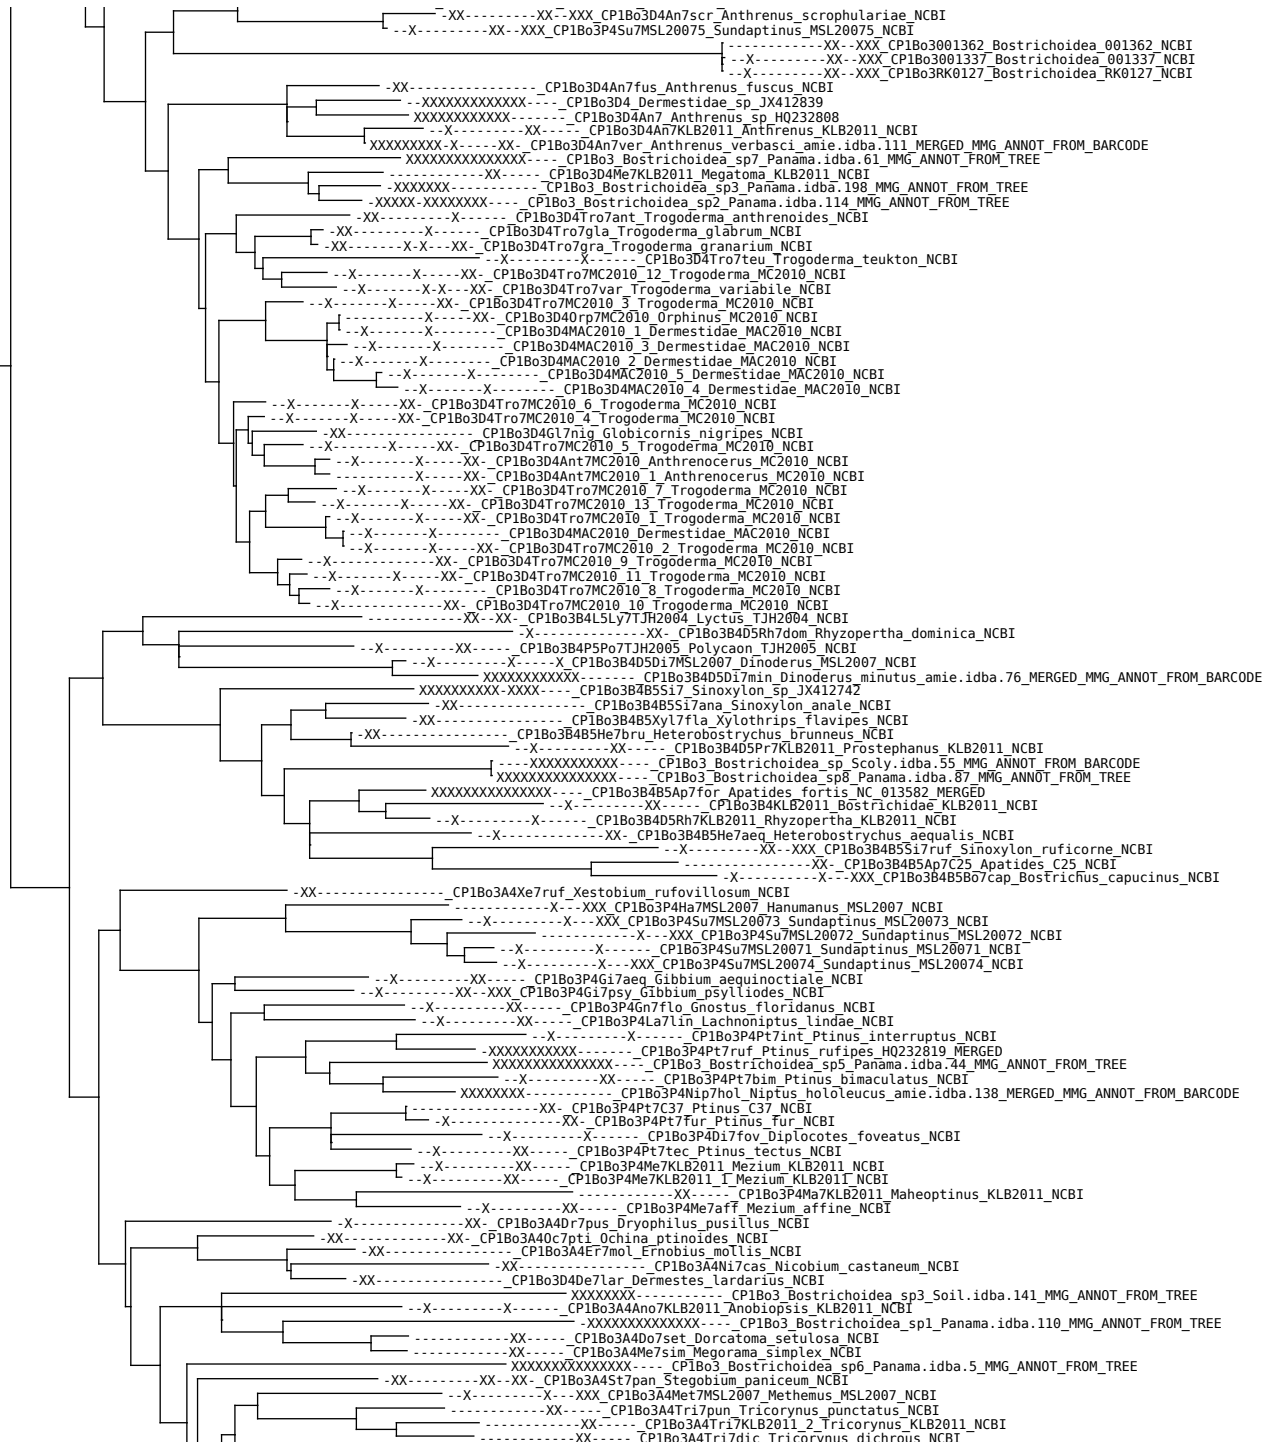

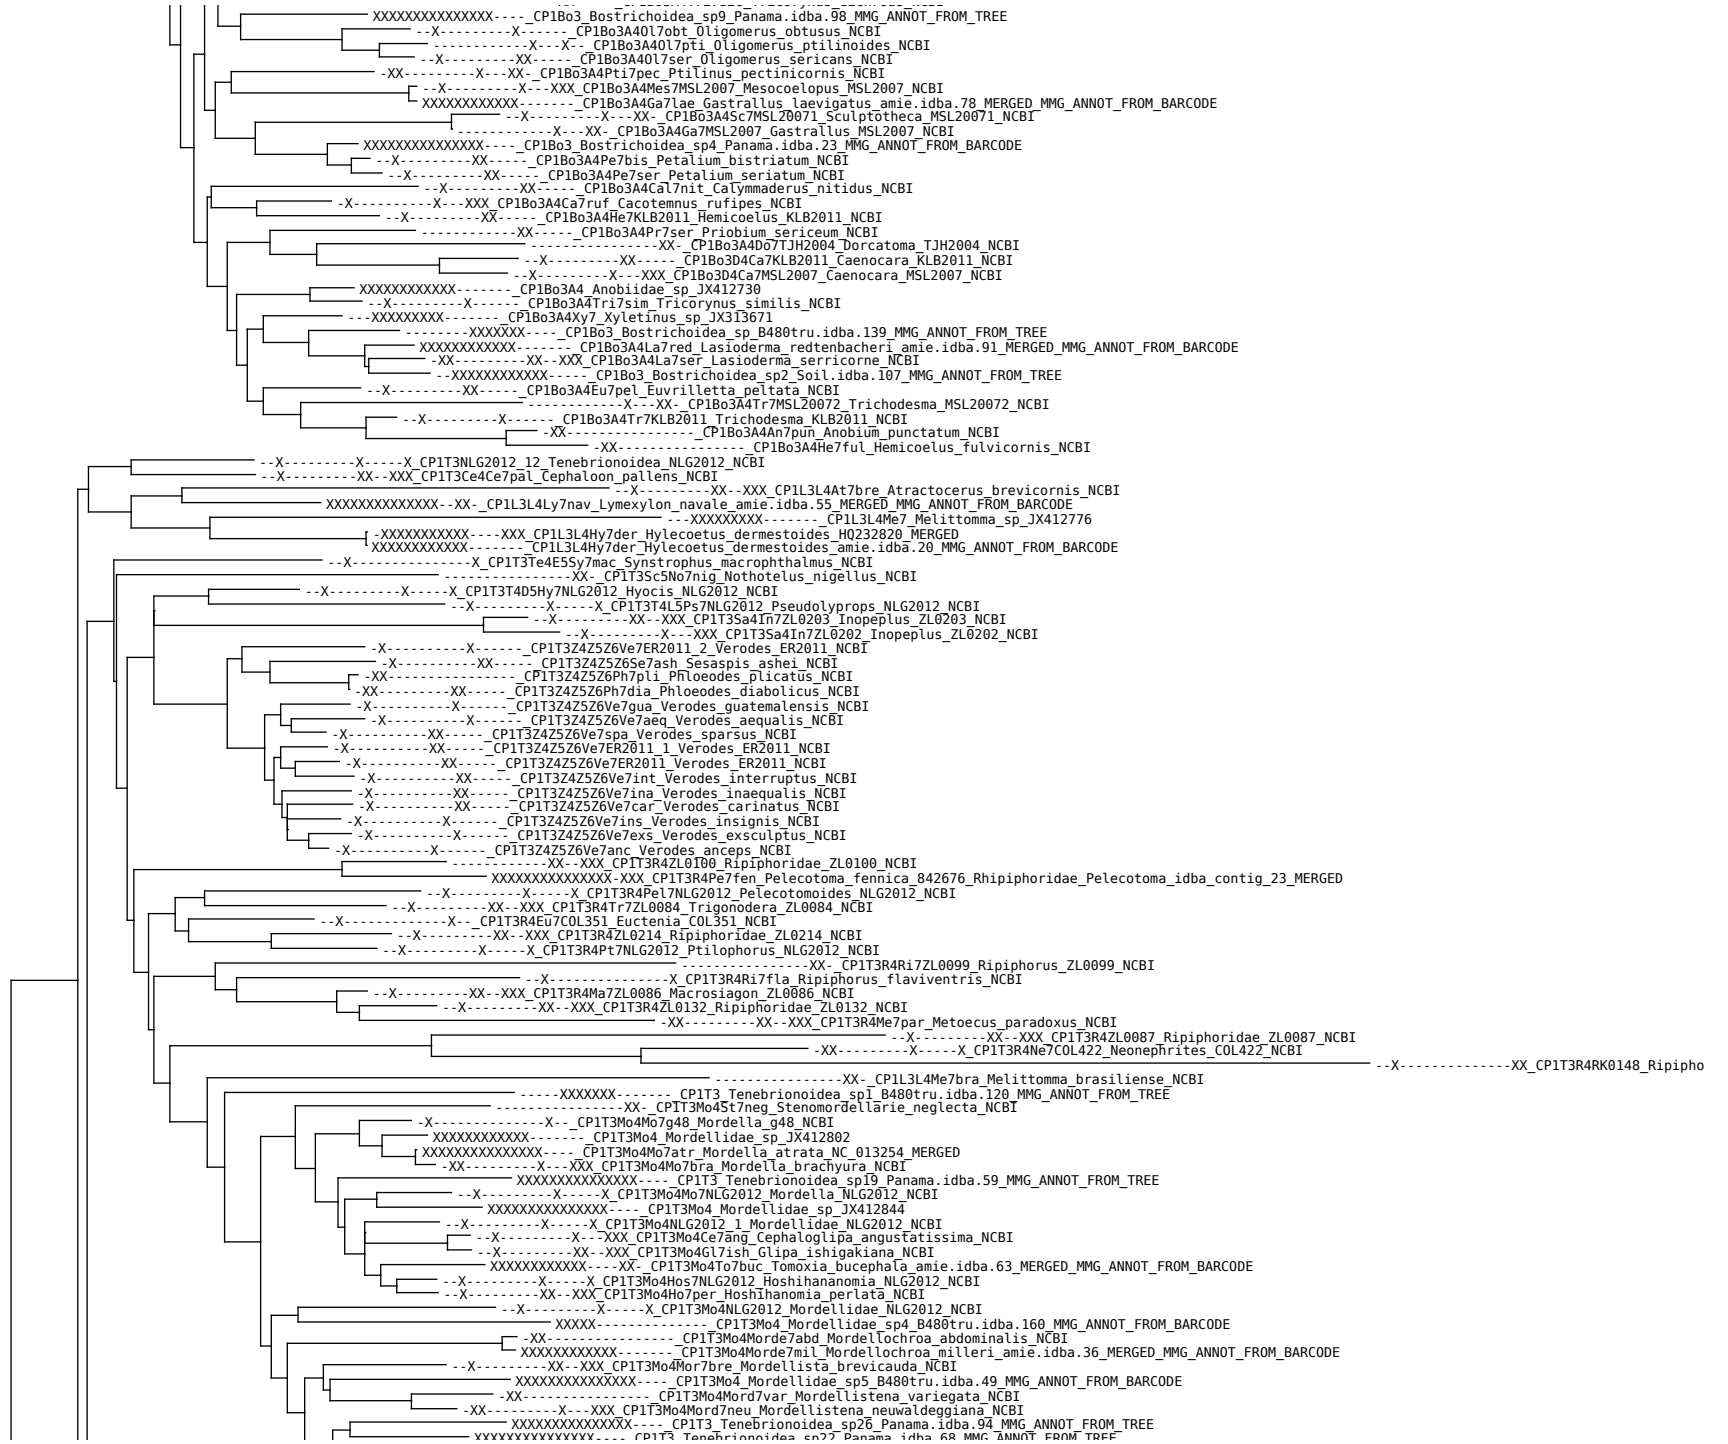

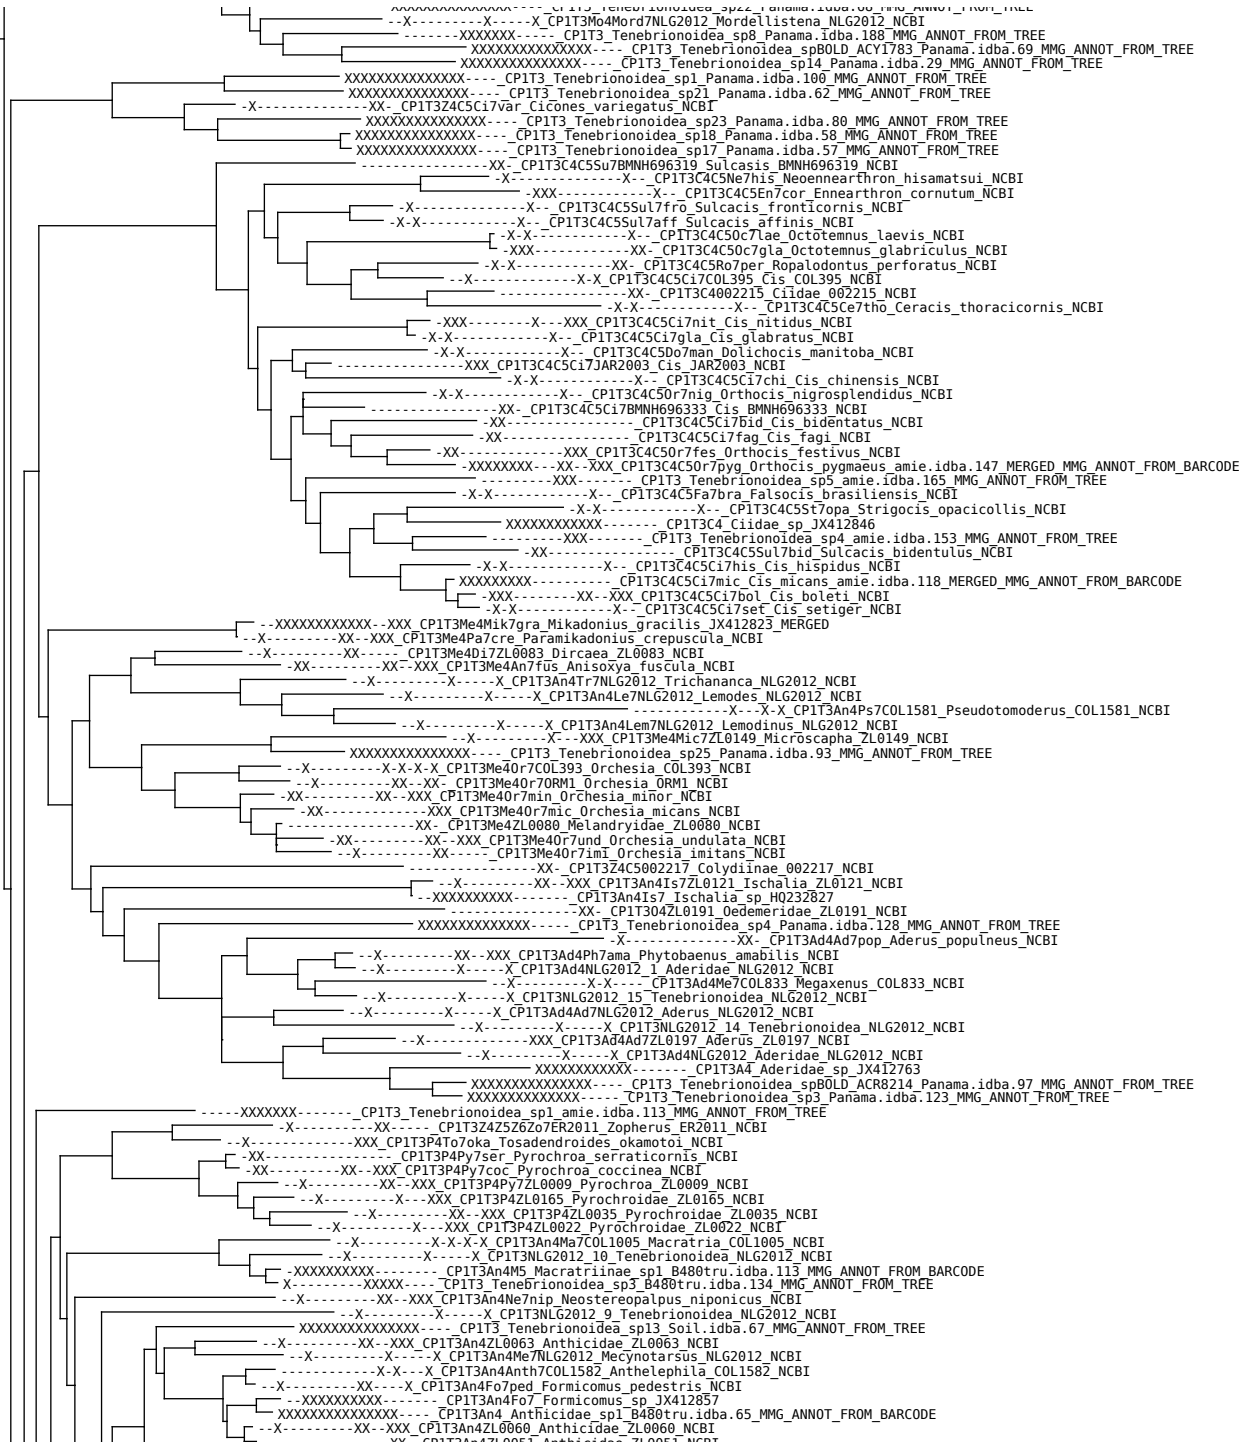

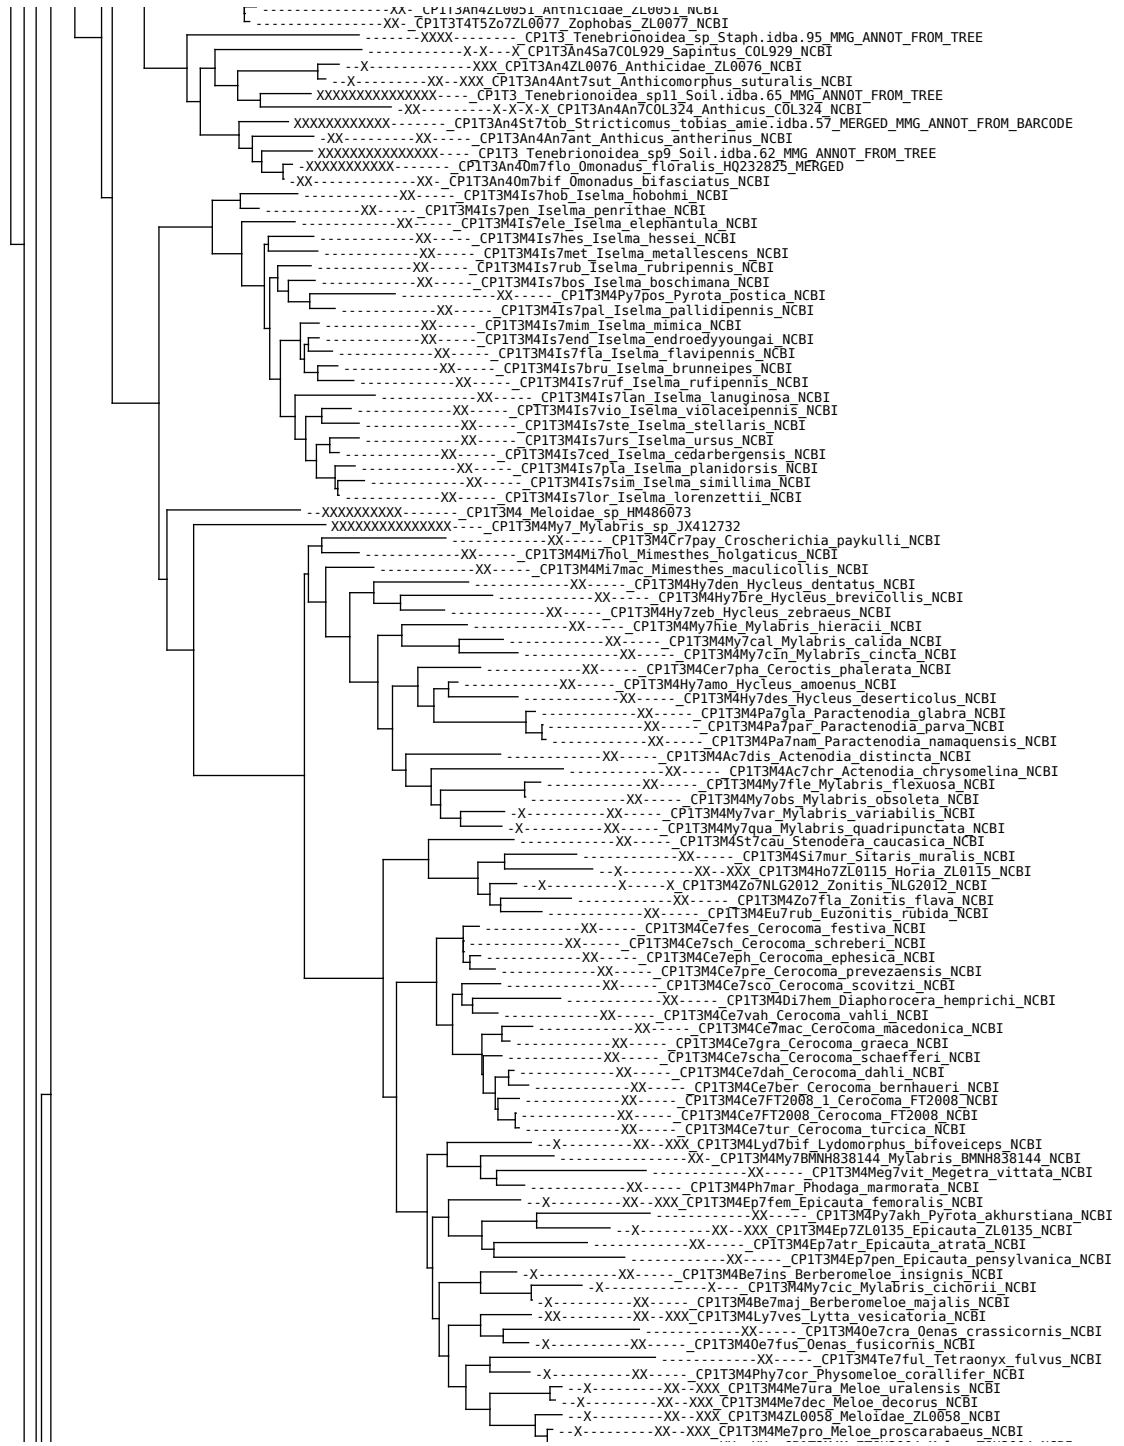

CP1T3M4L0091 Anthicidae\_ZL0091 NCBI  
CP1T3T4T5Z07ZL0077 Zophobas\_ZL0077 NCBI  
CP1T3 Tenebrionidea\_sp Staph.idba.95 MMG\_ANNOT\_FROM\_TREE  
CP1T3An4Sa7COL929 Sapintus\_COL929 NCBI  
CP1T3An4ZL0076 Anthicidae\_ZL0076 NCBI  
CP1T3An4Ant7sut Anthicomorphus suturalis NCBI  
CP1T3 Tenebrionidea sp11 Soil.idba.65 MMG\_ANNOT\_FROM\_TREE  
CP1T3An4An7COL324 Anthicus\_COL324 NCBI  
CP1T3An4St7tob Stricticomus tobias amie.idba.57 MERGED\_MMG\_ANNOT\_FROM\_BARCODE  
CP1T3An4An7ant Anthicus antherinus NCBI  
CP1T3 Tenebrionidea sp9 Soil.idba.62 MMG\_ANNOT\_FROM\_TREE  
CP1T3An4Om7fio Omonadus flogatis\_H0232825\_MERGED  
CP1T3An4Om7bif Omonadus bifasciatus NCBI  
CP1T3M4Is7ho5 Iselma hobohmi NCBI  
CP1T3M4Is7pen Iselma penrithae NCBI  
CP1T3M4Is7ele Iselma elephanta NCBI  
CP1T3M4Is7hes Iselma hessei NCBI  
CP1T3M4Is7met Iselma metallescens NCBI  
CP1T3M4Is7rub Iselma rubripennis NCBI  
CP1T3M4Is7bos Iselma boschimana NCBI  
CP1T3M4Py7pos Pyrota postica NCBI  
CP1T3M4Is7pal Iselma pallidipennis NCBI  
CP1T3M4Is7mim Iselma mimica NCBI  
CP1T3M4Is7end Iselma endroedyoungai NCBI  
CP1T3M4Is7fla Iselma flavipennis NCBI  
CP1T3M4Is7bru Iselma brunneipes NCBI  
CP1T3M4Is7ruf Iselma rufipennis NCBI  
CP1T3M4Is7lan Iselma lanuginosa NCBI  
CP1T3M4Is7vio Iselma violaceipennis NCBI  
CP1T3M4Is7ste Iselma stellaris NCBI  
CP1T3M4Is7urs Iselma ursus NCBI  
CP1T3M4Is7ced Iselma cedarbergensis NCBI  
CP1T3M4Is7pla Iselma planidensis NCBI  
CP1T3M4Is7sim Iselma simillima NCBI  
CP1T3M4Is7lor Iselma lorenzettii NCBI  
CP1T3M4 Meloidae\_sp HM486073  
CP1T3M4My7 Mylabris sp JX412732  
CP1T3M4Cr7pay Croscherichia paykulli NCBI  
CP1T3M4Mi7hol Mimesthes holgaticus NCBI  
CP1T3M4Mi7mac Mimesthes maculicollis NCBI  
CP1T3M4Hy7den Hycleus dentatus NCBI  
CP1T3M4Hy7bre Hycleus brevicollis NCBI  
CP1T3M4Hy7zeb Hycleus zebratus NCBI  
CP1T3M4My7rie Mylabris hieracii NCBI  
CP1T3M4My7cal Mylabris calida NCBI  
CP1T3M4My7cin Mylabris cincta NCBI  
CP1T3M4Cer7pha Ceroctis phalerata NCBI  
CP1T3M4Hy7amo Hycleus amoenus NCBI  
CP1T3M4Hy7des Hycleus deserticolus NCBI  
CP1T3M4Pa7gla Paractenodia glabra NCBI  
CP1T3M4Pa7par Paractenodia parva NCBI  
CP1T3M4Par7nam Paractenodia namaquensis NCBI  
CP1T3M4C7dis Actenodia distincta NCBI  
CP1T3M4Ac7chr Actenodia chrysolina NCBI  
CP1T3M4My7fle Mylabris flexuosa NCBI  
CP1T3M4My7obs Mylabris obsoleta NCBI  
CP1T3M4My7var Mylabris variabilis NCBI  
CP1T3M4My7qua Mylabris quadripunctata NCBI  
CP1T3M4St7cau Stenodera caucasica NCBI  
CP1T3M4Si7mur Sitaris muralis NCBI  
CP1T3M4Ho7ZL0115 Horia\_ZL0115 NCBI  
CP1T3M4Z07NLG2012 Zonitis\_NLG2012 NCBI  
CP1T3M4Z07fla Zonitis flava NCBI  
CP1T3M4Eu7rub Euzonitis rubida NCBI  
CP1T3M4Ce7fes Cerocoma festiva NCBI  
CP1T3M4Ce7sch Cerocoma schreberi NCBI  
CP1T3M4Ce7eph Cerocoma ephesica NCBI  
CP1T3M4Ce7pre Cerocoma prevezaensis NCBI  
CP1T3M4Ce7sco Cerocoma scovitzii NCBI  
CP1T3M4Di7hem Diaphorocera hemprichi NCBI  
CP1T3M4Ce7vah Cerocoma vahli NCBI  
CP1T3M4Ce7mac Cerocoma macedonica NCBI  
CP1T3M4Ce7gra Cerocoma graeca NCBI  
CP1T3M4Ce7scha Cerocoma schaefferi NCBI  
CP1T3M4Ce7dah Cerocoma dahli NCBI  
CP1T3M4Ce7ber Cerocoma bernhaueri NCBI  
CP1T3M4Ce7FT2008\_1 Cerocoma\_FT2008 NCBI  
CP1T3M4Ce7FT2008\_Cerocoma\_FT2008 NCBI  
CP1T3M4Ce7tur Cerocoma turcica NCBI  
CP1T3M4Lyd7bif Lydomorphus bifoveiceps NCBI  
CP1T3M4My7BMNH838144 Mylabris\_BMNH838144 NCBI  
CP1T3M4Meg7vit Megetra vittata NCBI  
CP1T3M4Ph7mar Phodaga marmorata NCBI  
CP1T3M4Ep7fem Epicauta femoralis NCBI  
CP1T3M4Py7akh Pyrota akhurstiana NCBI  
CP1T3M4Ep7ZL0135 Epicauta\_ZL0135 NCBI  
CP1T3M4Ep7atr Epicauta atrata NCBI  
CP1T3M4Ep7pen Epicauta pensylvanica NCBI  
CP1T3M4Be7ins Berberomeloe insignis NCBI  
CP1T3M4My7cic Mylabris cichorii NCBI  
CP1T3M4Be7maj Berberomeloe majalis NCBI  
CP1T3M4Ly7ves Lytta vesicatoria NCBI  
CP1T3M4Oe7cra Oenas crassicornis NCBI  
CP1T3M4Oe7fus Oenas fuscicornis NCBI  
CP1T3M4Te7ful Tetraonyx fulvus NCBI  
CP1T3M4Phy7cor Physomeloe coralifer NCBI  
CP1T3M4Me7ura Meloe uralensis NCBI  
CP1T3M4Me7dec Meloe decorus NCBI  
CP1T3M4ZL0058 Meloidae\_ZL0058 NCBI  
CP1T3M4Me7pro Meloe proscarabaeus NCBI

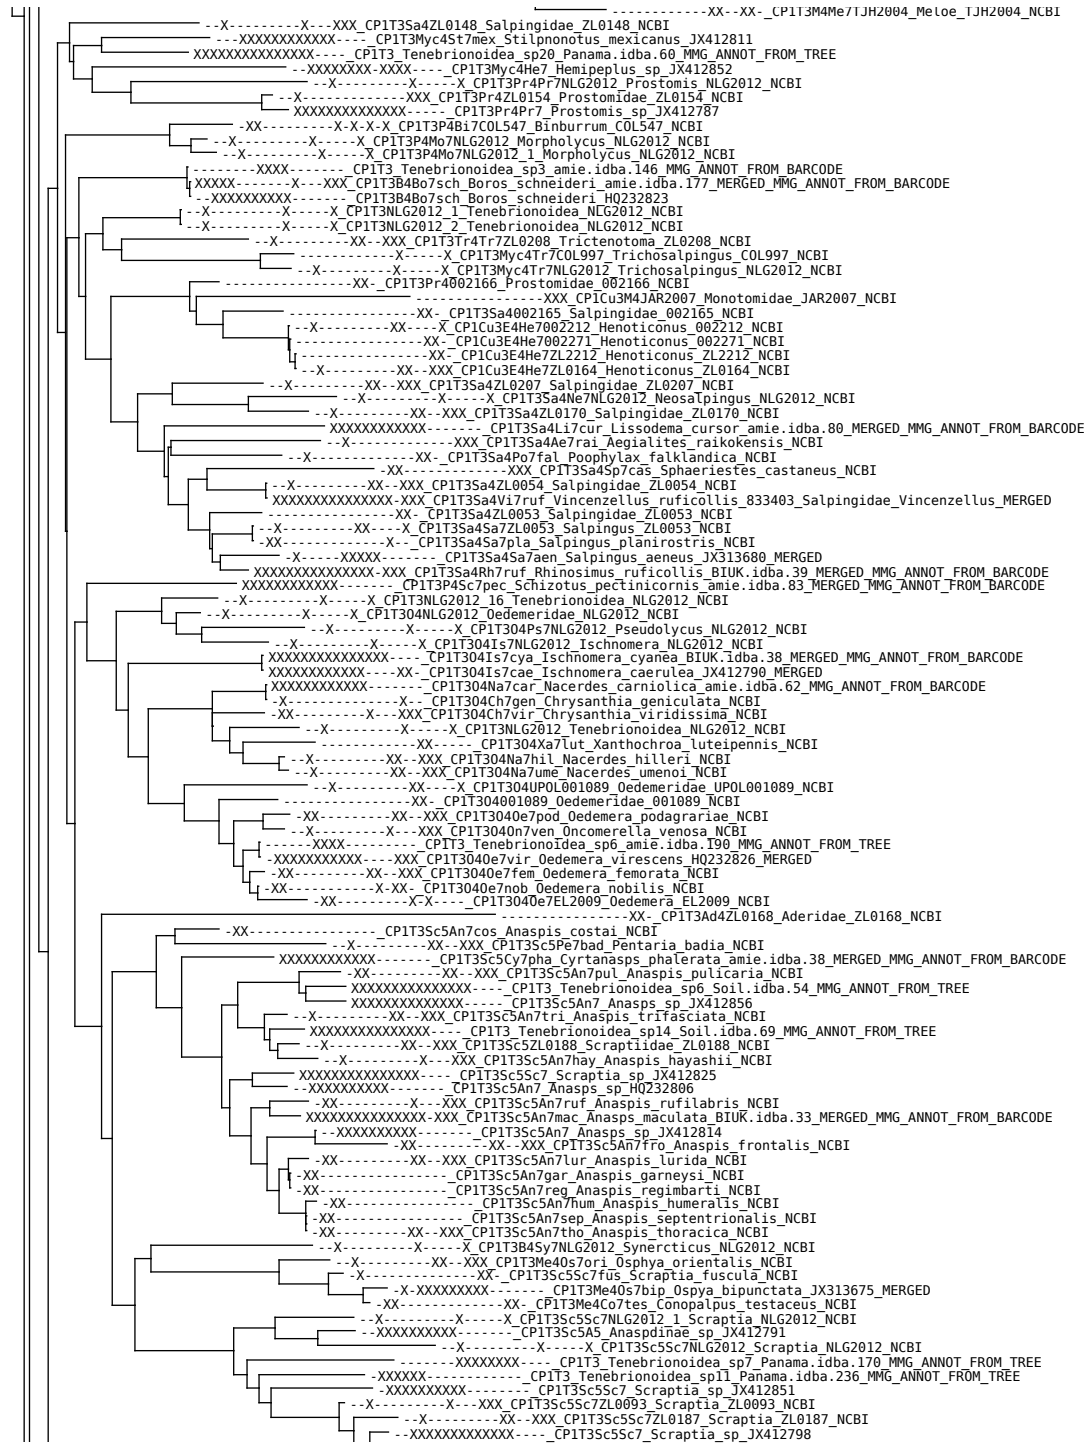



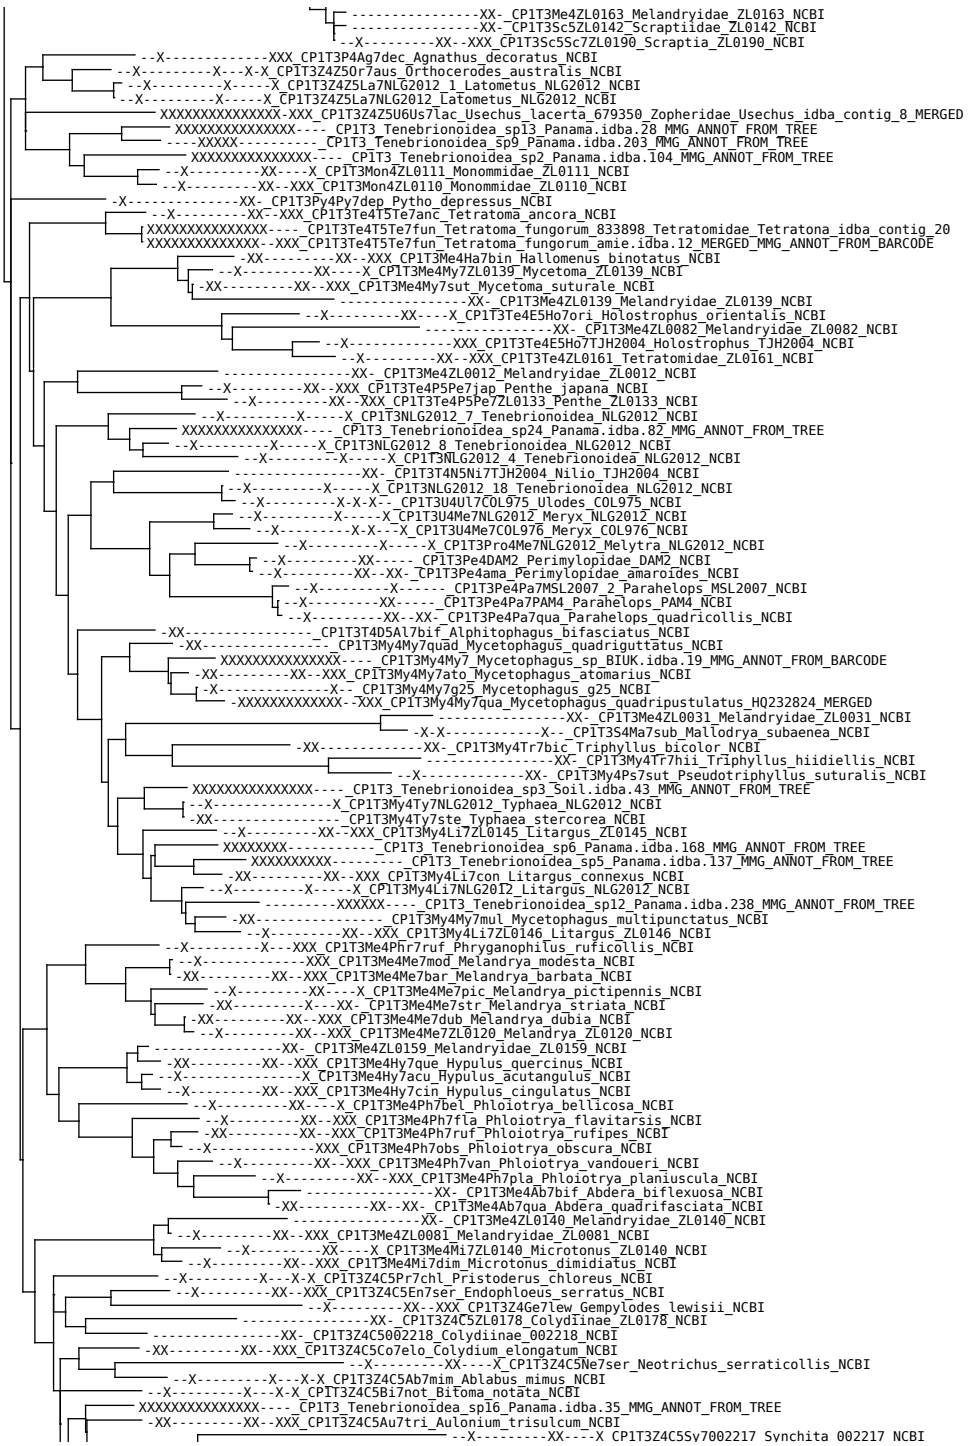

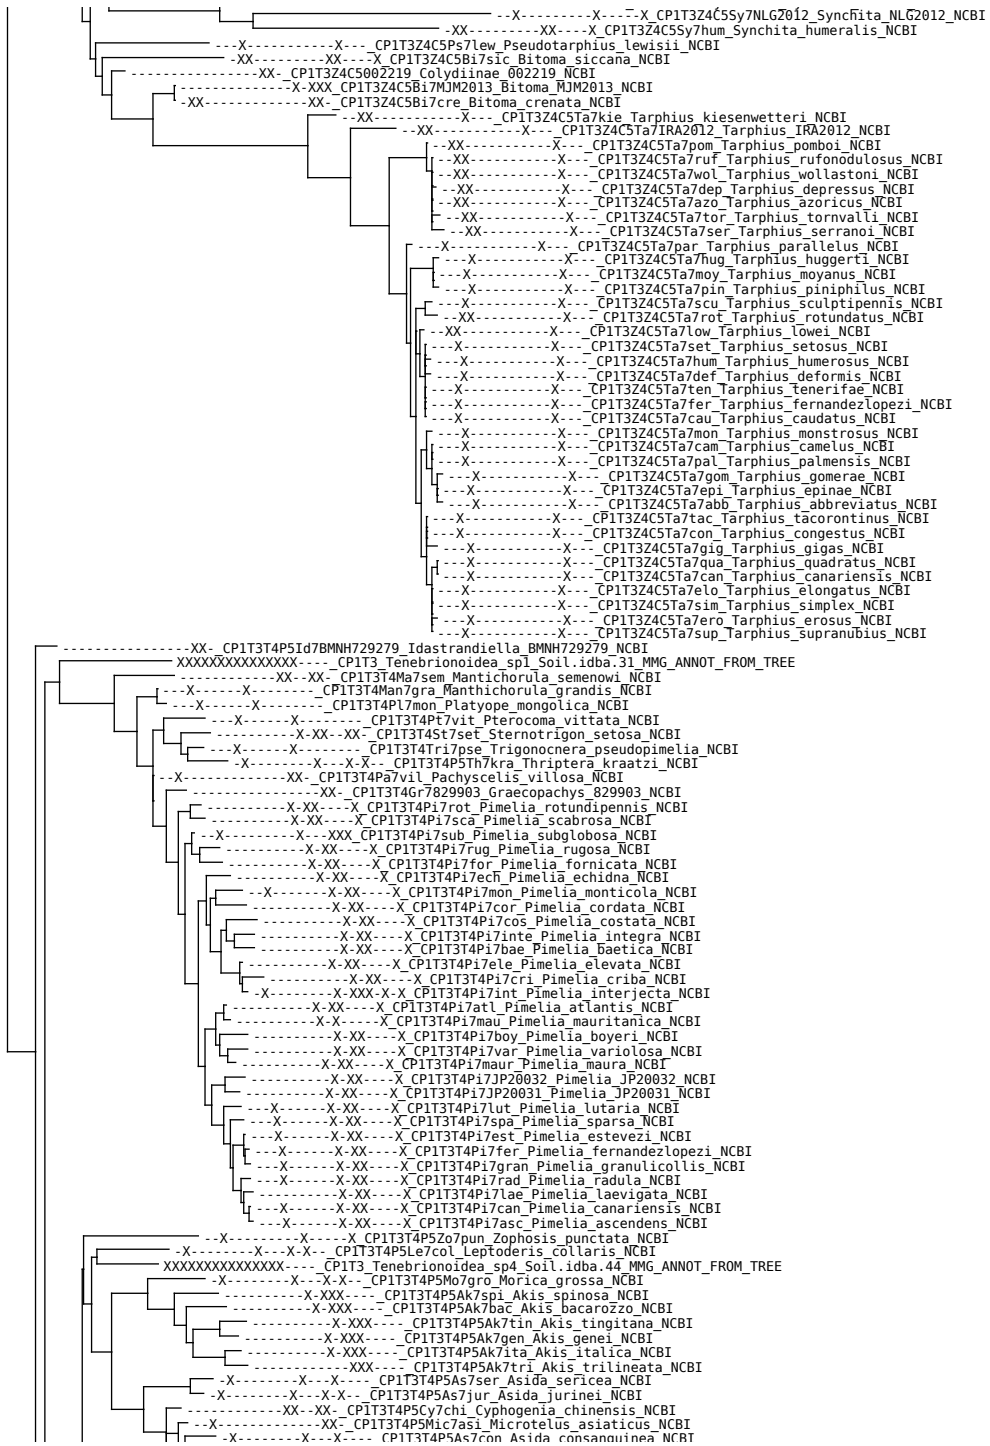

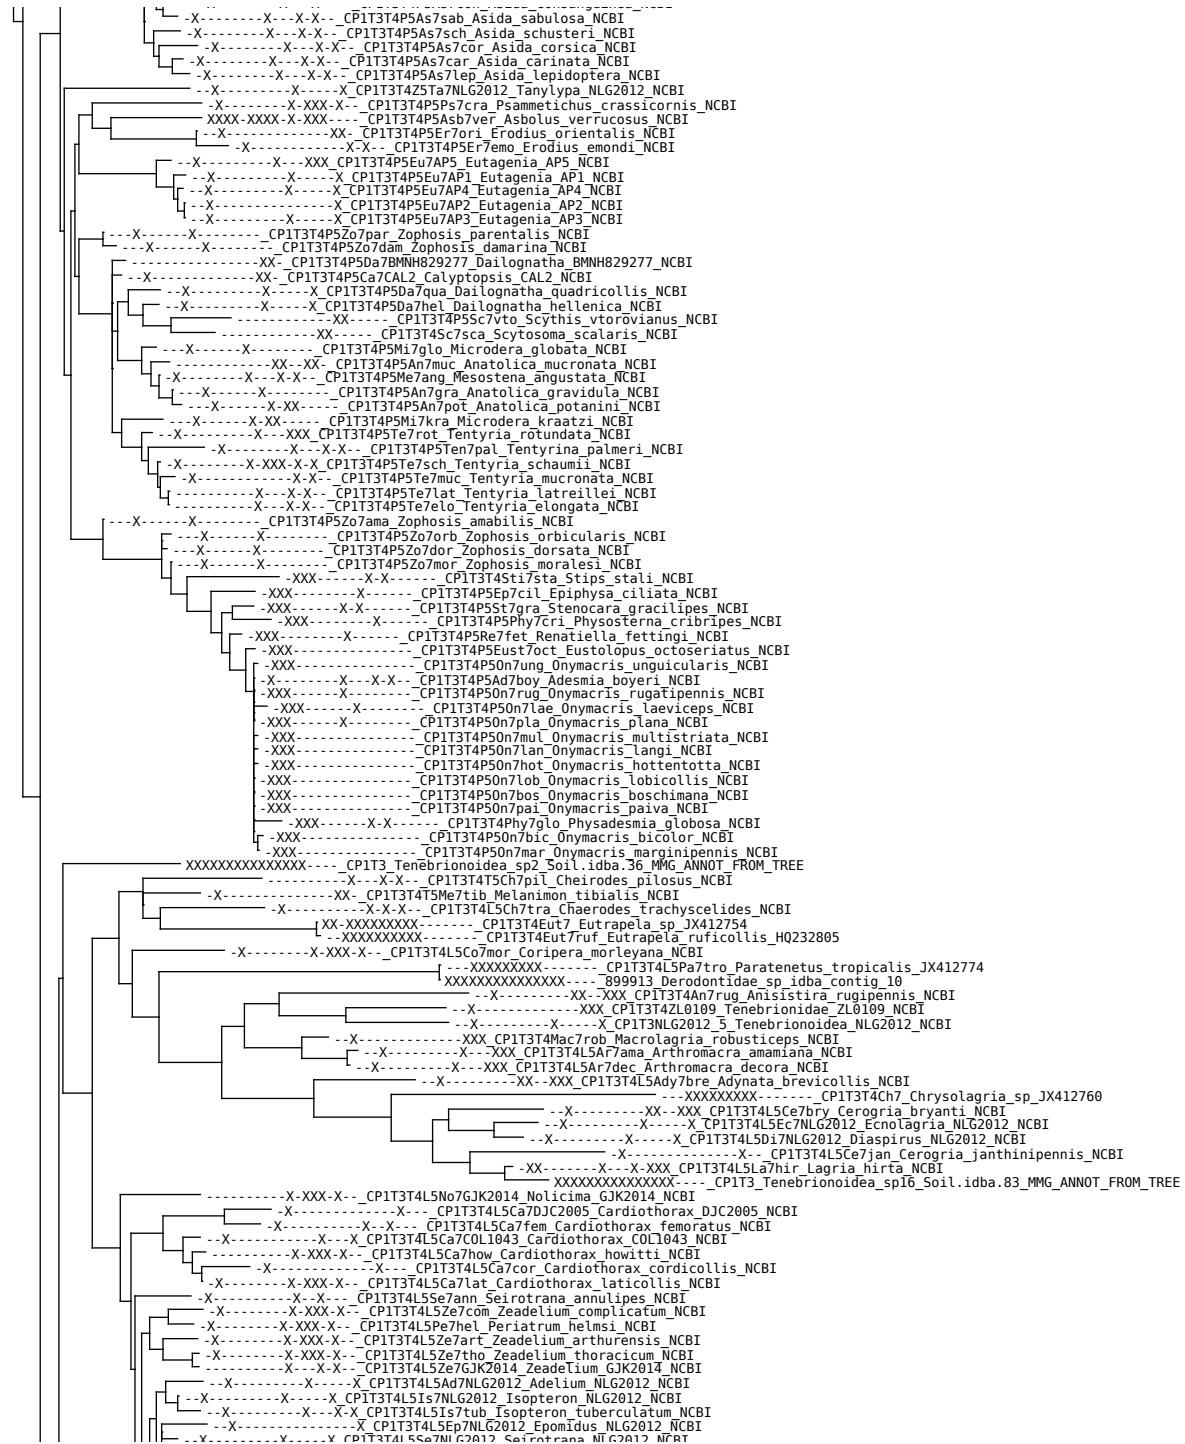

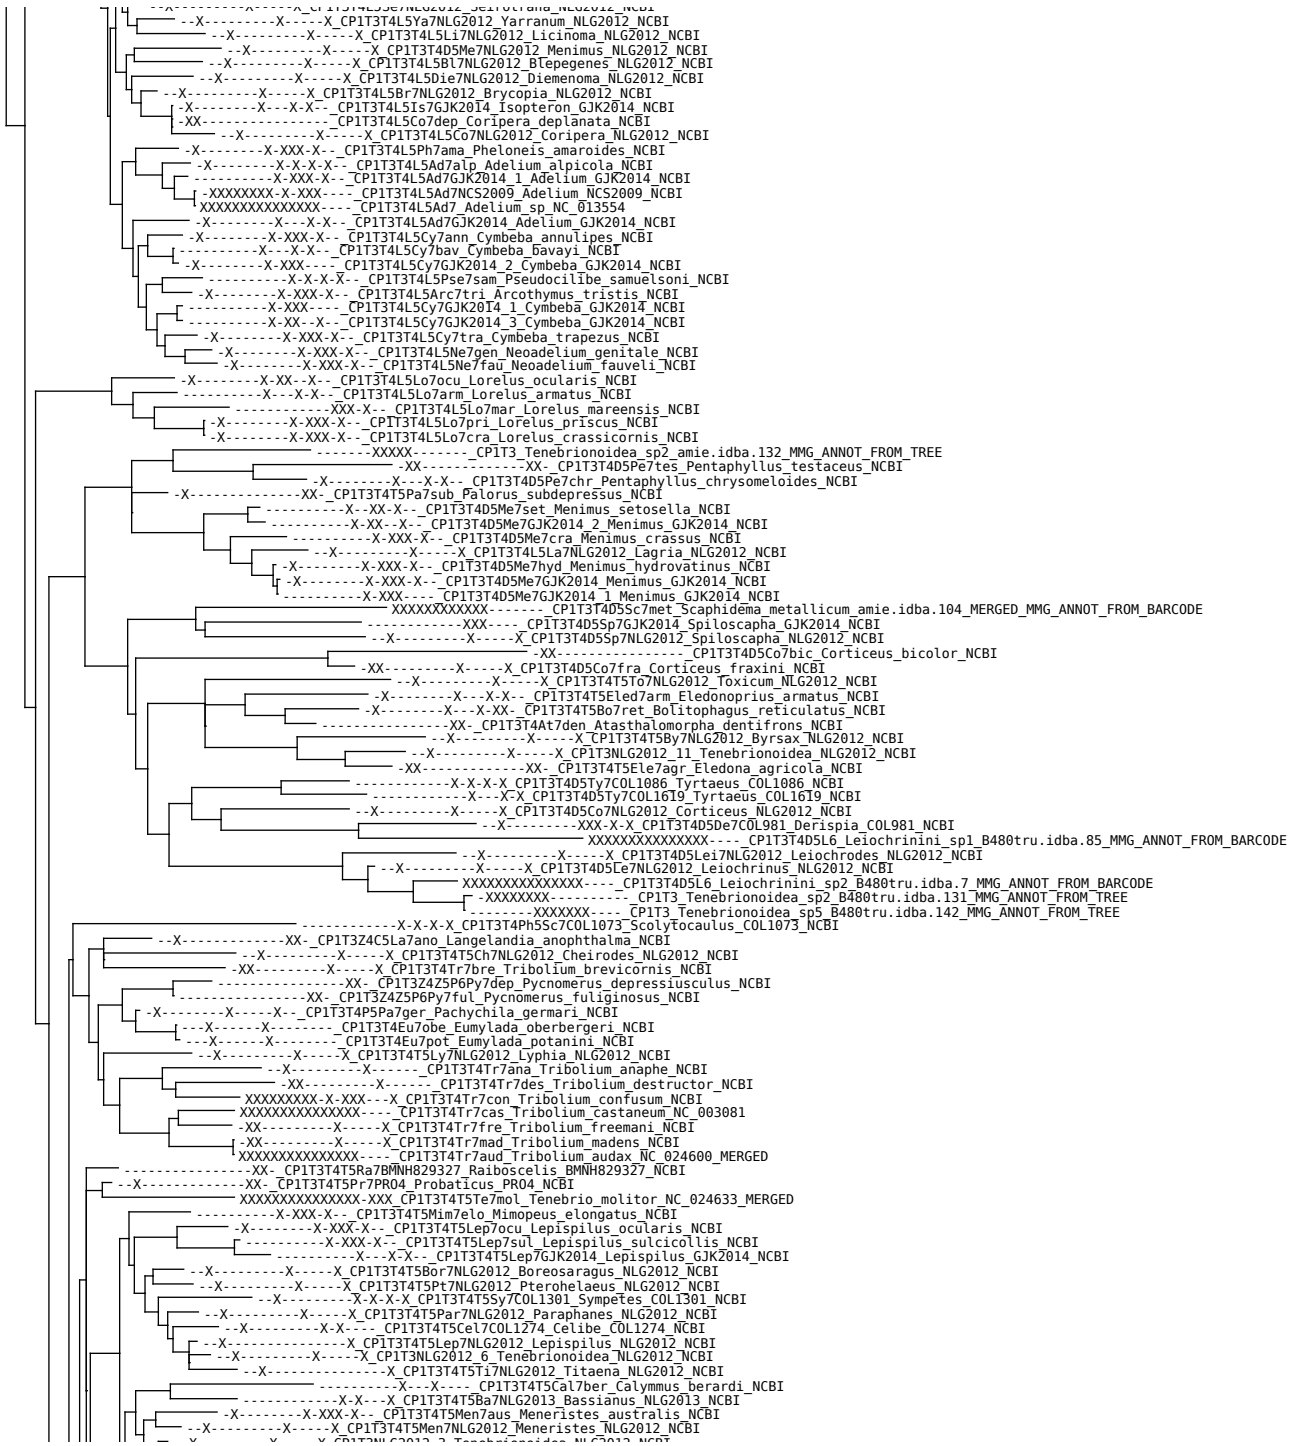

Phylogenetic tree showing relationships between various species, with labels such as CP1T3T4T5Lea7NLG2012\_1, CP1T3T4T5Lea7NLG2012\_2, and CP1T3T4T5Lea7NLG2012\_3. The tree is rooted on the left and branches out to the right. Species names are listed on the right side of the tree, often followed by their NCBI accession numbers. The tree is annotated with 'X' and 'XX' characters, likely indicating specific characteristics or data points for each species. The tree is highly branched, showing a complex evolutionary history. The labels are in a monospace font, and the tree structure is represented by vertical and horizontal lines.

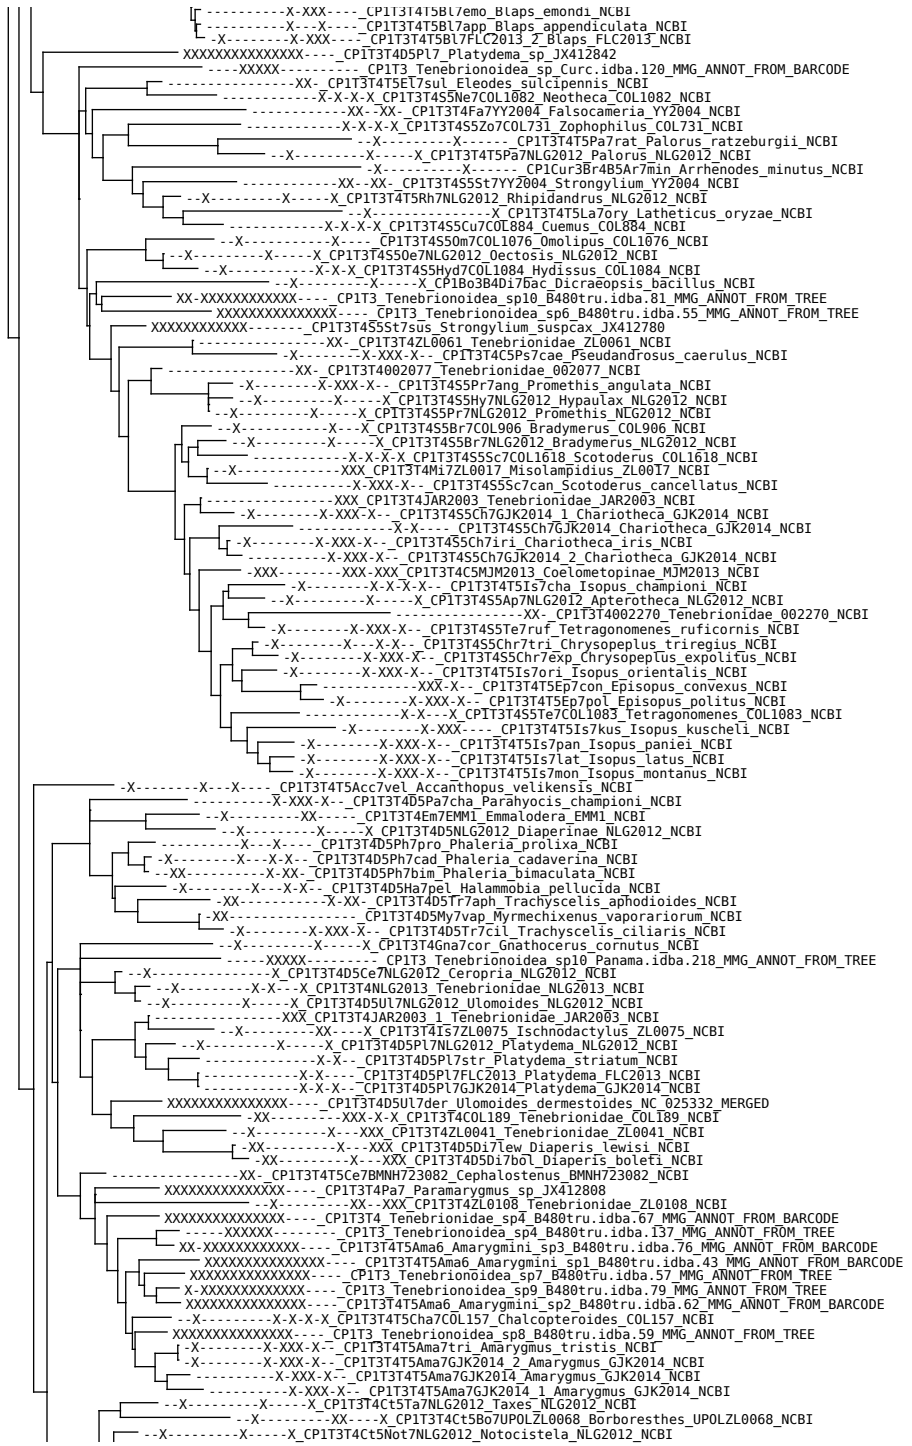

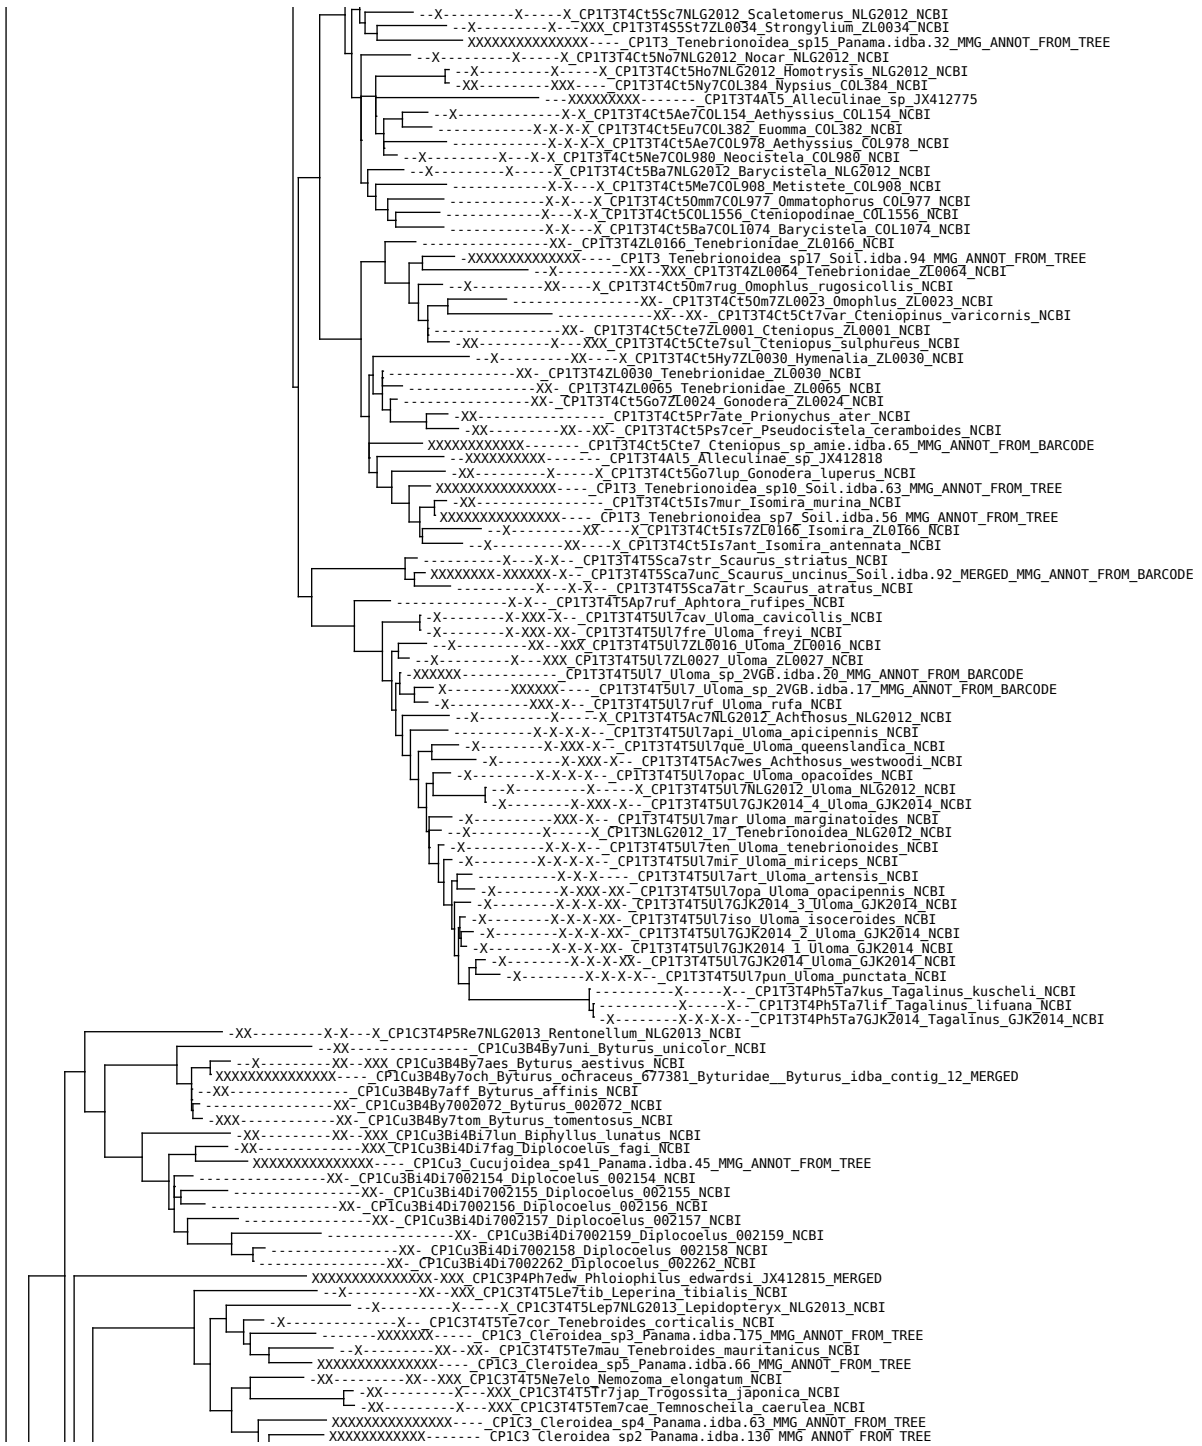

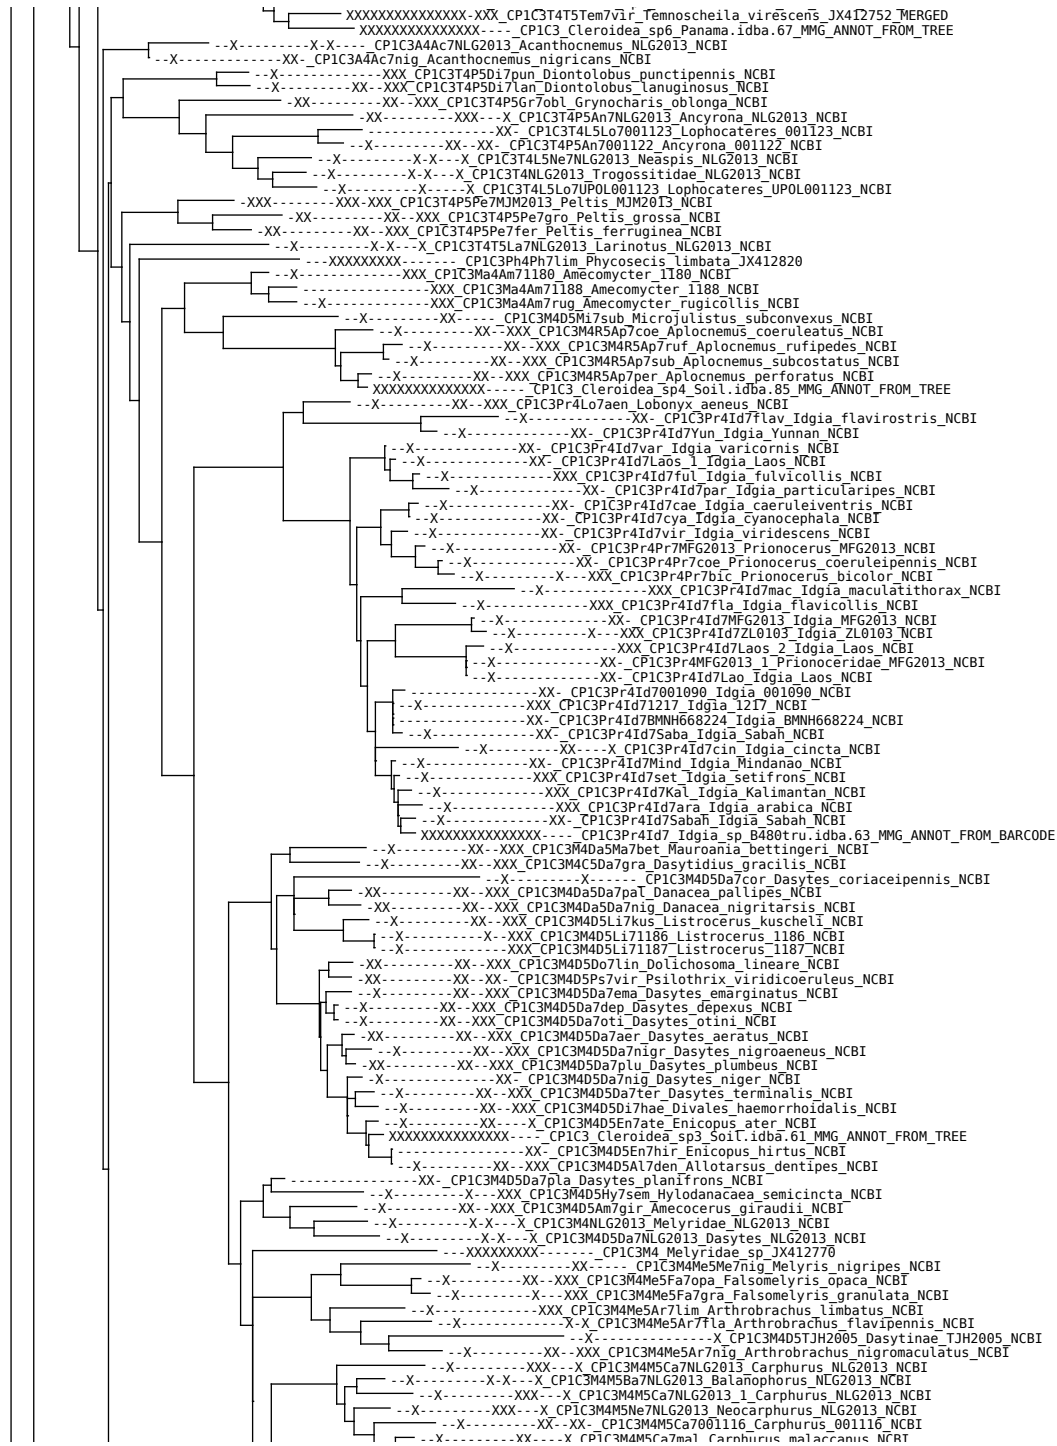



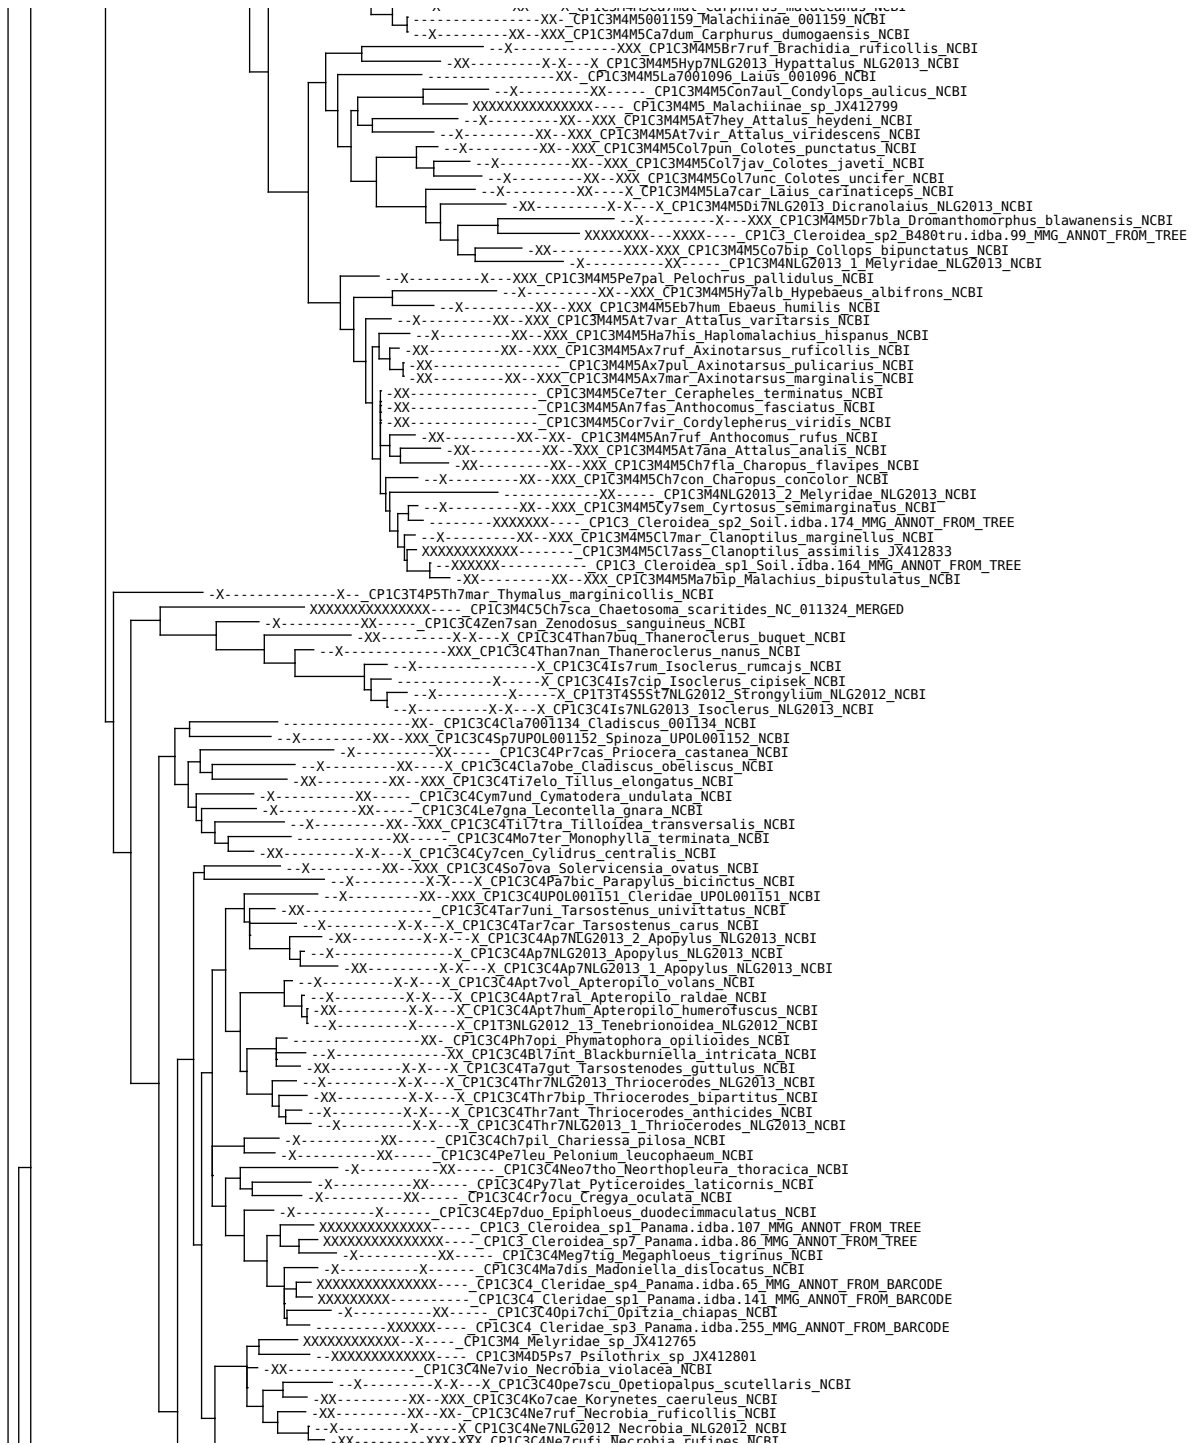

Phylogenetic tree showing relationships between various species, with taxonomic labels and accession numbers. The tree is rooted on the left and branches out to the right. Labels include species names and identifiers such as CP1C3C4Epi7bas, CP1C3C4De7san, etc. Some labels are followed by "NCBI" or "MMG\_ANNOT\_FROM\_BARCODE".

XXXXXXXXXXXXXXXXXXXX CP1C3C4Epi7bas\_Epiclines\_basalis\_NCBI  
-XX-XXX-CP1C3C4Epi7bas\_Epiclines\_basalis\_NCBI  
-XX-XXX-CP1C3C4De7san\_Dermestoides\_sanguinicollis\_NCBI  
XXXXXXXXXXXXXXXXXXXX CP1C3C4 Cleridae\_sp2\_B480tru.idba.47\_MMG\_ANNOT\_FROM\_BARCODE  
-X-XXX-CP1C3C4Te7UPOL001158\_Tenerus\_UPOL001158\_NCBI  
-XX-XXX-CP1C3C4Te7abb\_Tenerus\_abbreviatus\_NCBI  
-X-CP1C3C4Te7NLG2013\_Tenerus\_NLG2013\_NCBI  
-XX-CP1C3C4Te7001158\_Tenerus\_001158\_NCBI  
-XX-XXX-CP1C3C4Te7UPOL001147\_Tenerus\_UPOL001147\_NCBI  
-XX-XXX-CP1C3C4Te7UPOL001154\_Tenerus\_UPOL001154\_NCBI  
-X-XXX-CP1C3C4Cle7nov\_Cleromorpha\_novemuttata\_NCBI  
-XX-XXX-CP1C3C4E17NLG2013\_1\_Eleale\_NLG2013\_NCBI  
-XX-XXX-CP1C3C4E17lep\_Eleale\_lepida\_NCBI  
-X-XXX-CP1C3C4E17aul\_Eleale\_aulicodes\_NCBI  
-X-XXX-CP1C3C4E17par\_Eleale\_parallela\_NCBI  
-X-XXX-CP1C3C4E17rob\_Eleale\_robusta\_NCBI  
-XX-XXX-CP1C3C4E17NLG2013\_Eleale\_NLG2013\_NCBI  
-X-XXX-CP1C3C4E17NLG2012\_Eleale\_NLG2012\_NCBI  
-XX-XXX-CP1C3C4Eu7NLG2013\_1\_Eunatalis\_NLG2013\_NCBI  
-XX-XXX-CP1C3C4Eu7NLG2013\_3\_Eunatalis\_NLG2013\_NCBI  
-XX-XXX-CP1C3C4Eu7NLG2013\_2\_Eunatalis\_NLG2013\_NCBI  
-XX-CP1C3C4Eu7NLG2013\_4\_Eunatalis\_NLG2013\_NCBI  
-XX-XXX-CP1C3C4Eu7NLG2013\_Eunatalis\_NLG2013\_NCBI  
-XX-XXX-CP1C3C4Me7NLG2013\_1\_Metademius\_NLG2013\_NCBI  
-XX-XXX-CP1C3C4Me7NLG2013\_Metademius\_NLG2013\_NCBI  
-X-XXX-CP1C3C4Me7lea\_Metademius\_leai\_NCBI  
-X-XXX-CP1C3C4Na7NLG2013\_Natalis\_NLG2013\_NCBI  
-XX-CP1C3C4Ph17BMNH668168\_Phlogistus\_BMNH668168\_NCBI  
-XX-XXX-CP1C3C40l7tub\_Olesterus\_tuberculosis\_NCBI  
-X-XXX-CP1C3C4T7ro7mon\_Trogodendron\_monstrosum\_NCBI  
-X-XXX-CP1C3C40p7NLG2013\_Opilo\_NLG2013\_NCBI  
-X-XXX-CP1C3C40p7con\_Opilo\_congruus\_NCBI  
-X-XXX-CP1C3C40v7NLG2013\_Oodontophlogistus\_NLG2013\_NCBI  
-XX-CP1C3C4Tha7TJH2004\_Thanasimodes\_TJH2004\_NCBI  
-XX-CP1C3C4Tr7TJH2004\_Trichodes\_TJH2004\_NCBI  
-XX-XXX-CP1C3C4Tro7fas\_Trogodendron\_fasciculatum\_NCBI  
-XX-XXX-CP1C3C4Sc7alb\_Scrobiger\_albocinctus\_NCBI  
-XX-CP1C3C4Sc7spe\_Scrobiger\_spendidus\_NCBI  
-XX-XXX-CP1C3C40p7pal\_Opilo\_pallidus\_NCBI  
-XX-XXX-CP1C3C40p7mol\_Opilo\_mollis\_NCBI  
-XX-XXX-CP1C3C4Neos7rau\_Neoscrobiger\_rauciceps\_NCBI  
-XX-XXX-CP1C3C4Neos7pat\_Neoscrobiger\_patricius\_NCBI  
-X-XXX-CP1C3C4Tr7umb\_Trichodes\_umbellatarum\_NCBI  
-X-XXX-CP1C3C4Tr7fav\_Trichodes\_favarius\_NCBI  
-XX-XXX-CP1C3C4Tr7alv\_Trichodes\_alvearius\_NCBI  
-X-XXX-CP1C3C4Tr7oct\_Trichodes\_octopunctatus\_NCBI  
XXXXXXXX-XXX-CP1C3C4Tr7leu\_Trichodes\_leucopsidens\_ame.idba.184\_MERGED\_MMG\_ANNOT\_FROM\_BARCODE  
-XX-XXX-CP1C3C4Tr7orn\_Trichodes\_ornatus\_NCBI  
-XX-XXX-CP1C3C4Tr7api\_Trichodes\_apiarius\_NCBI  
-XX-XXX-CP1C3C4ze7cra\_Zenithicola\_crassus\_NCBI  
-XX-XXX-CP1C3C4Ph17NLG2013\_Phlogistus\_NLG2013\_NCBI  
-XX-XXX-CP1C3C4Ph17NLG2013\_2\_Phlogistus\_NLG2013\_NCBI  
-X-XXX-CP1C3C4Ph17NLG2012\_Phlogistus\_NLG2012\_NCBI  
-XX-XXX-CP1C3C4Ph17NLG2013\_1\_Phlogistus\_NLG2013\_NCBI  
-XX-XXX-CP1C3C4Ph17leu\_Phlogistus\_leucocosmus\_NCBI  
-XX-XXX-CP1C3C4Phlo7api\_Phlogistomorpha\_apicalis\_NCBI  
-XX-XXX-CP1C3C4Phlo7cro\_Phlogistomorpha\_croesus\_NCBI  
-X-XXX-CP1C3C40r7sep\_Orthrus\_sepulcralis\_NCBI  
-X-XXX-CP1C3C40p7whi\_Opilo\_whitei\_NCBI  
XXXXXXXXXXXXXXXXXXXX CP1C3C4 Tarsosteninae\_sp\_B480tru.idba.70\_MMG\_ANNOT\_FROM\_BARCODE  
XXXXXXXXXXXXXXXXXXXX CP1C3C4 Cleridae\_sp1\_B480tru.idba.60\_MMG\_ANNOT\_FROM\_BARCODE  
-XX-CP1C3C4Phy7tes\_Phyllobaenus\_testaceus\_NCBI  
-XX-CP1C3C4Phy7NLG2013\_2\_Phyllobaenus\_NLG2013\_NCBI  
-X-XXX-CP1C3C4Iso7tab\_Isohydnoera\_tabida\_NCBI  
-X-XXX-CP1C3C4Iso7cur\_Isohydnoera\_curtipennis\_NCBI  
-X-XXX-CP1C3C4Ce7NLG2013\_Cephaloclerus\_NLG2013\_NCBI  
-X-XXX-CP1C3C4Neoh7NLG2013\_Neohydnius\_NLG2013\_NCBI  
-X-XXX-CP1C3C4Em7NLG2013\_Emmepus\_NLG2013\_NCBI  
-X-XXX-CP1C3C4Neoh7sor\_Neohydnius\_sordidus\_NCBI  
-XX-CP1C3C4Phy7NLG2013\_1\_Phyllobaenus\_NLG2013\_NCBI  
-X-XXX-CP1C3C4Phy7NLG2013\_Phyllobaenus\_NLG2013\_NCBI  
-X-XXX-CP1C3C4Per7NLG2013\_Perilypus\_NLG2013\_NCBI  
-XXX-CP1C3 Cleroidea\_sp\_ame.idba.183\_MMG\_ANNOT\_FROM\_TREE  
-X-XXX-CP1C3C4Eur7UPOL001190\_Eurymetopum\_UPOL001190\_NCBI  
-X-XXX-CP1C3C4Eur7UPOL001189\_Eurymetopum\_UPOL001189\_NCBI  
-X-XXX-CP1C3C4Lem7hil\_Lemidia\_hilaris\_NCBI  
-X-XXX-CP1C3C4Lem7NLG2013\_1\_Lemidia\_NLG2013\_NCBI  
-X-XXX-CP1C3C4Lem7acc\_Lemidia\_accincta\_NCBI  
-X-XXX-CP1C3C4Lem7NLG2013\_Lemidia\_NLG2013\_NCBI  
-X-XXX-CP1C3C4Lem7obl\_Lemidia\_obliquefasciata\_NCBI  
-XX-XXX-CP1C3C4Lem7NLG2013\_2\_Lemidia\_NLG2013\_NCBI  
-X-XXX-CP1C3C4Lem7sut\_Lemidia\_suturalis\_NCBI  
-X-XXX-CP1C3C4St7NLG2013\_Stenocallimerus\_NLG2013\_NCBI  
-XX-CP1C3C4Br7lat\_Brachycallimerus\_latesionatus\_NCBI  
-X-XXX-CP1C3C4Ca7NLG2013\_4\_Callimerus\_NLG2013\_NCBI  
-X-XXX-CP1C3C4Ca7NLG2013\_2\_Callimerus\_NLG2013\_NCBI  
-X-XXX-CP1C3C4St7pra\_Stenocallimerus\_prasinatus\_NCBI  
-X-XXX-CP1C3C4Ca7001150\_Callimerus\_001150\_NCBI  
-X-XXX-CP1C3C4Ca7001156\_Callimerus\_001156\_NCBI  
XXXXXXXX-CP1C3C4 Cleridae\_sp2\_Panama.idba.230\_MMG\_ANNOT\_FROM\_BARCODE  
-X-XXX-CP1C3C40m7NLG2013\_Omadius\_NLG2013\_NCBI  
-XX-CP1C3C40m7NLG2013\_1\_Omadius\_NLG2013\_NCBI  
-X-XXX-CP1C3C40m7med\_Omadius\_mediofaciatus\_NCBI  
-X-XXX-CP1C3C40m7ind\_Omadius\_indicus\_NCBI  
-XX-XXX-CP1C3C40m7NLG2013\_2\_Omadius\_NLG2013\_NCBI  
-XX-XXX-CP1C3C40m7occ\_Omadius\_occipitalis\_NCBI  
XXXXXXXX-CP1C3C4C17\_Clerus\_sp\_B44241\_Cleridae\_Hydnocherus\_idba\_contig\_29  
XXXXXXXXXXXXXXXXXXXX CP1C3 Cleroidea\_sp1\_B480tru.idba.32\_MMG\_ANNOT\_FROM\_TREE  
-XX-XXX-CP1C3C4Th7for\_Thanasimus\_formicarius\_NCBI  
-X-XXX-CP1C3C4En7nig\_Enoclerus\_nigripes\_NCBI

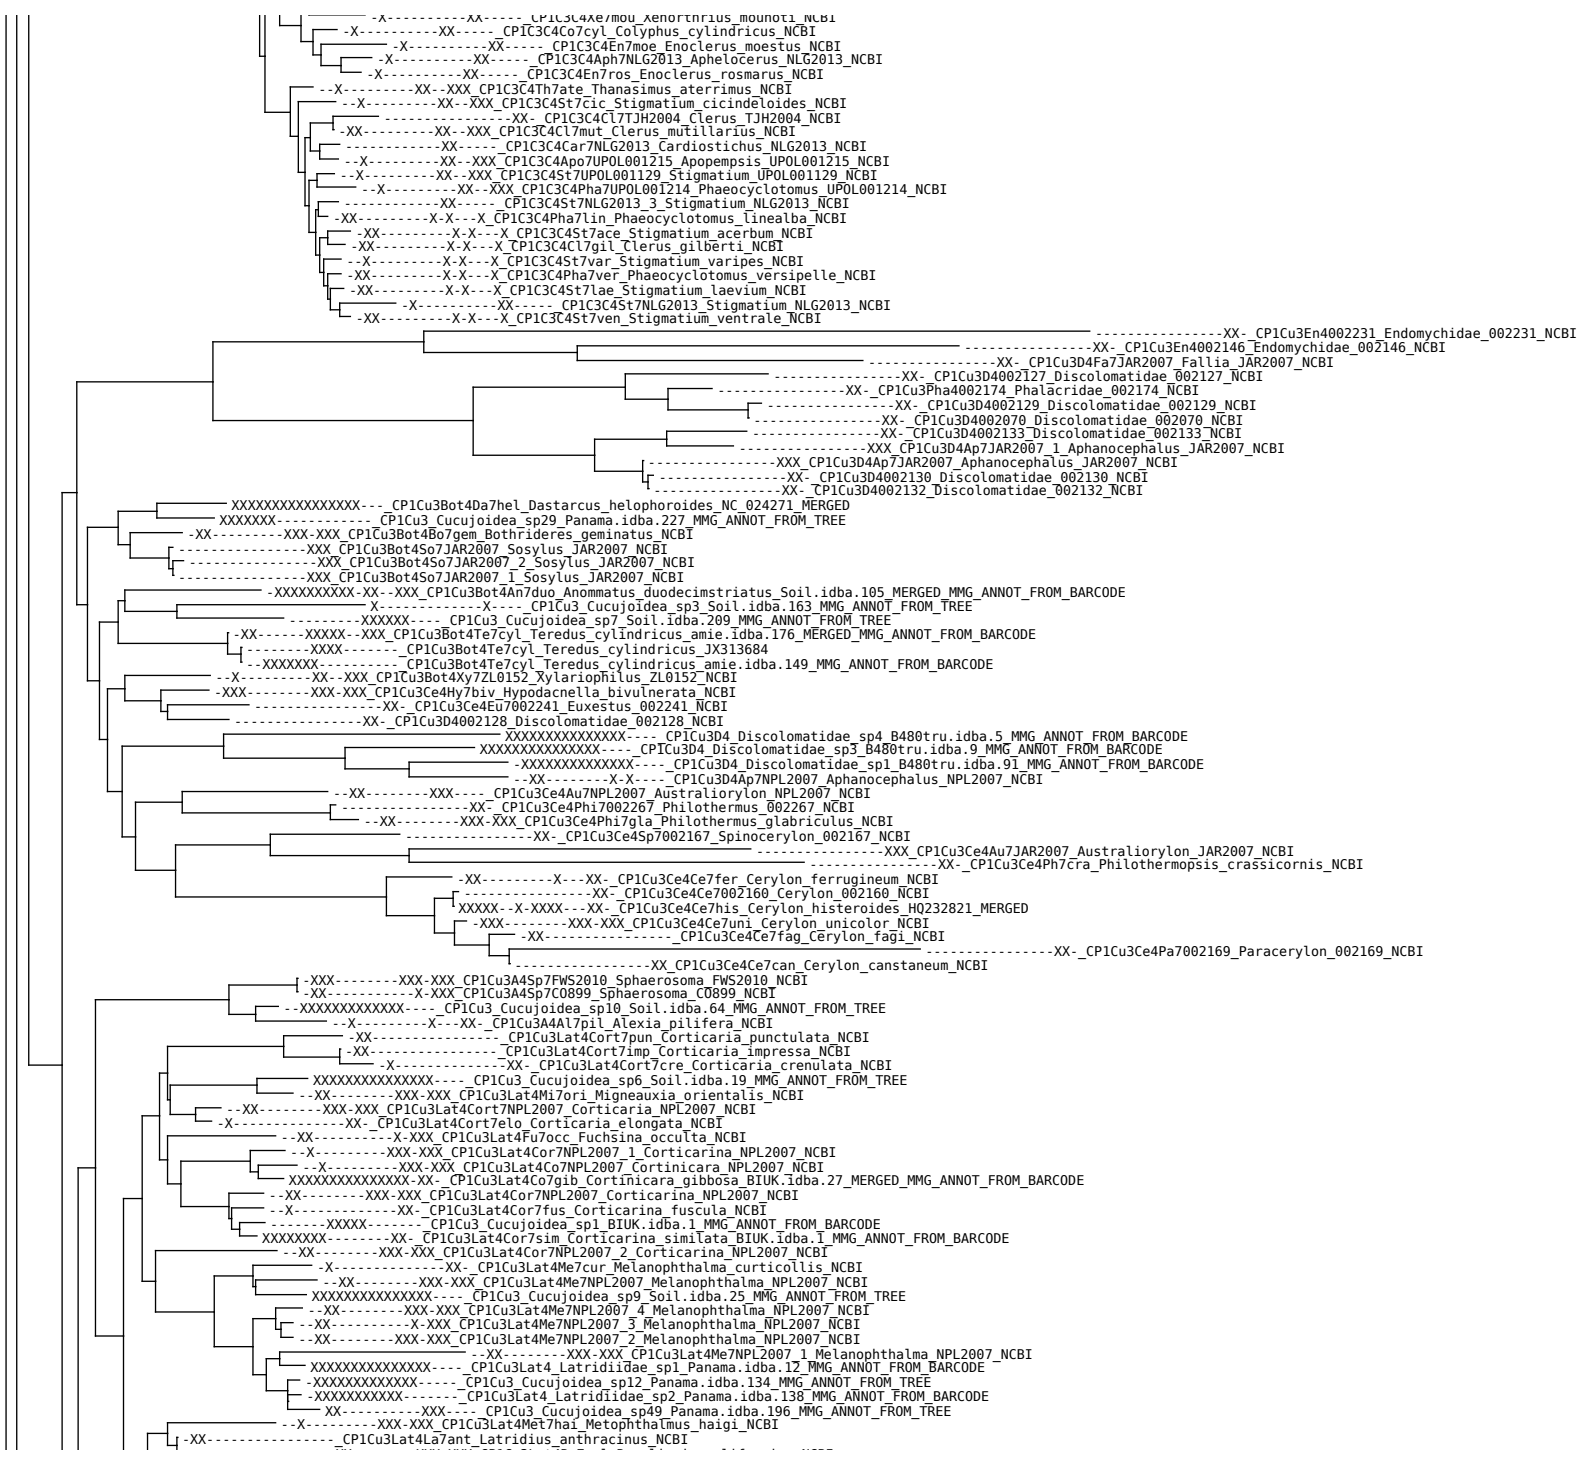

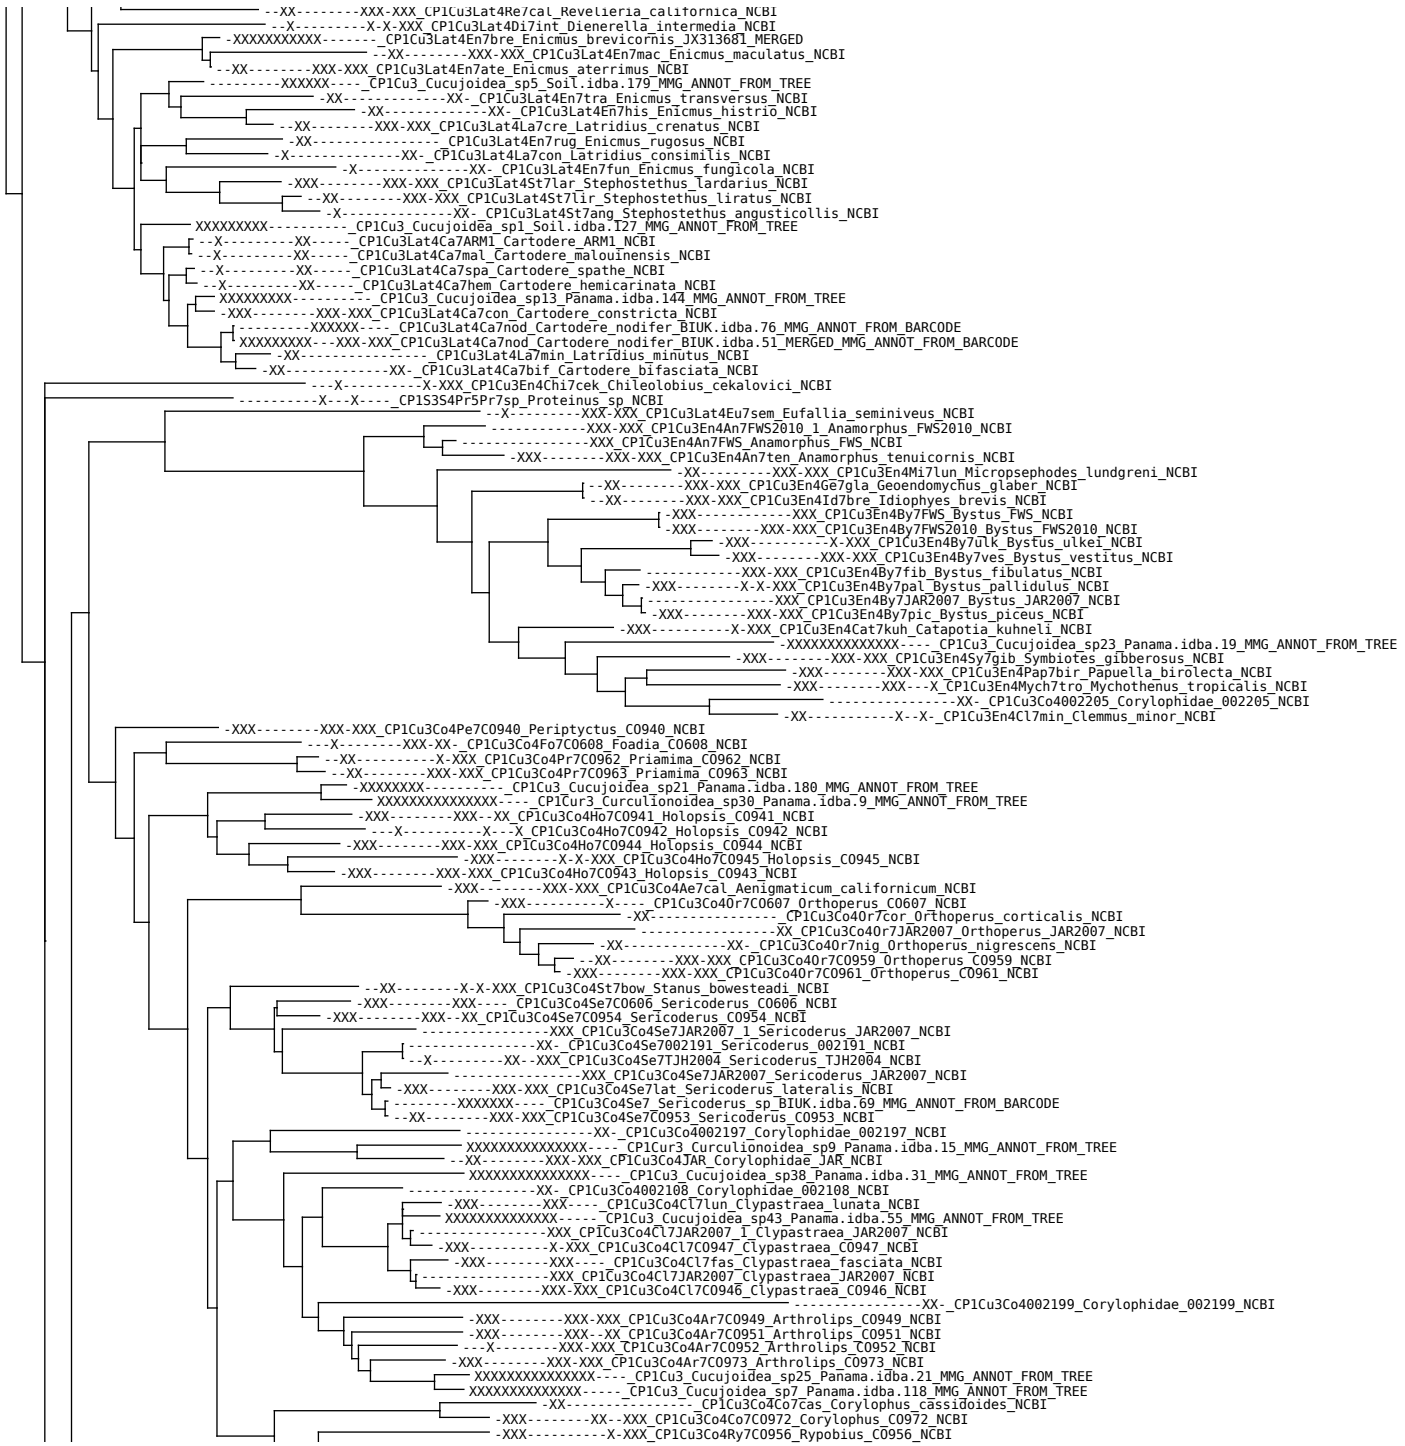

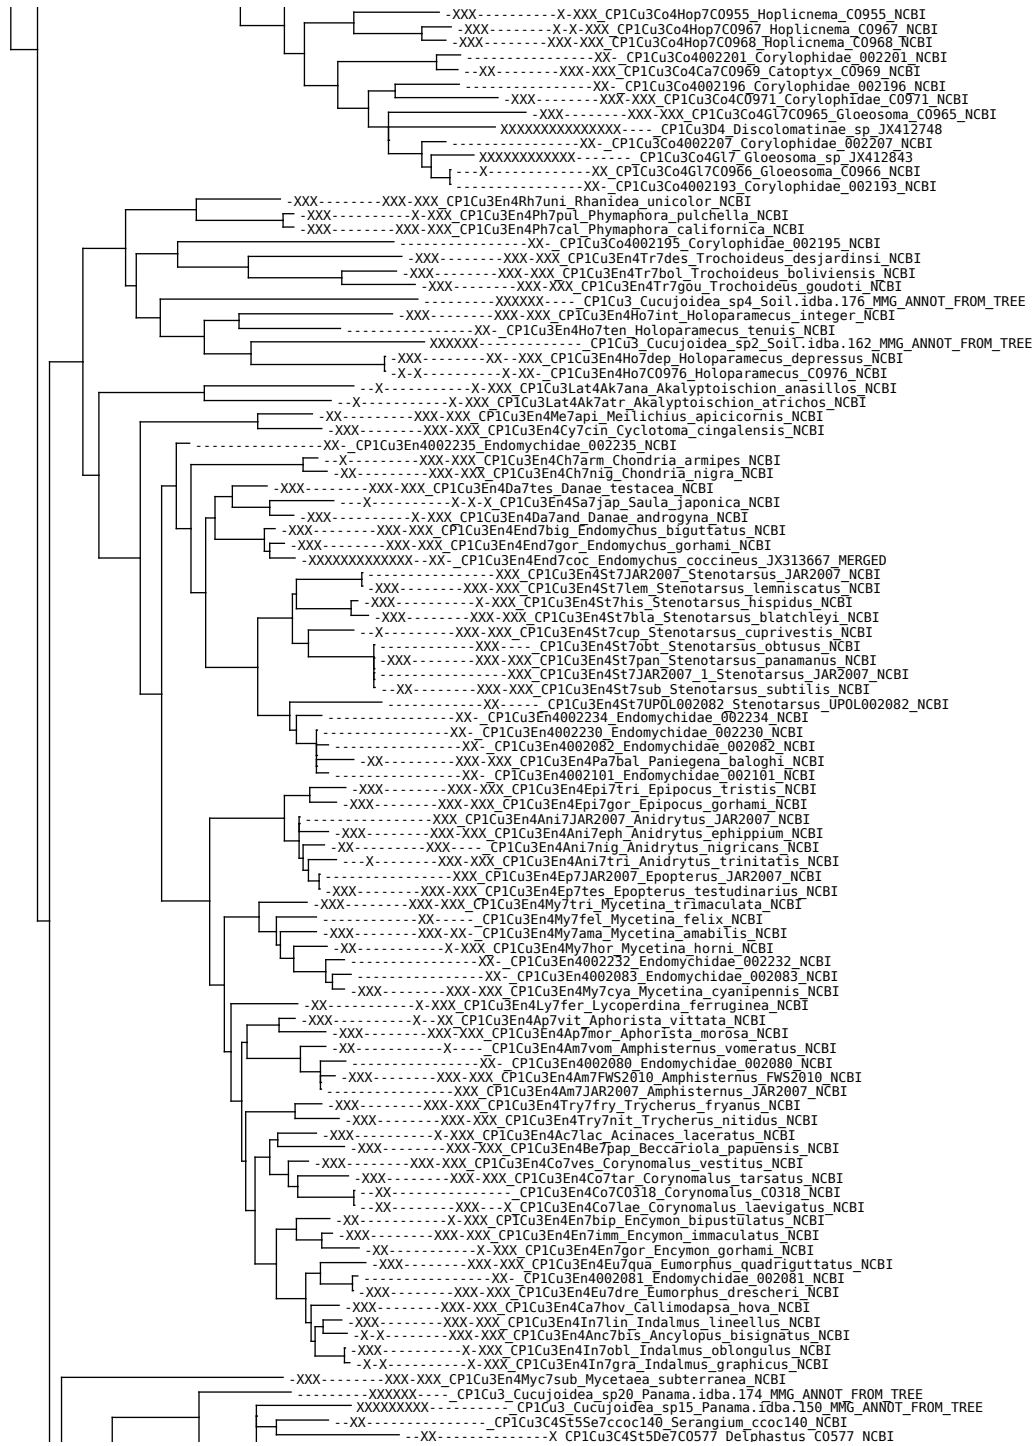



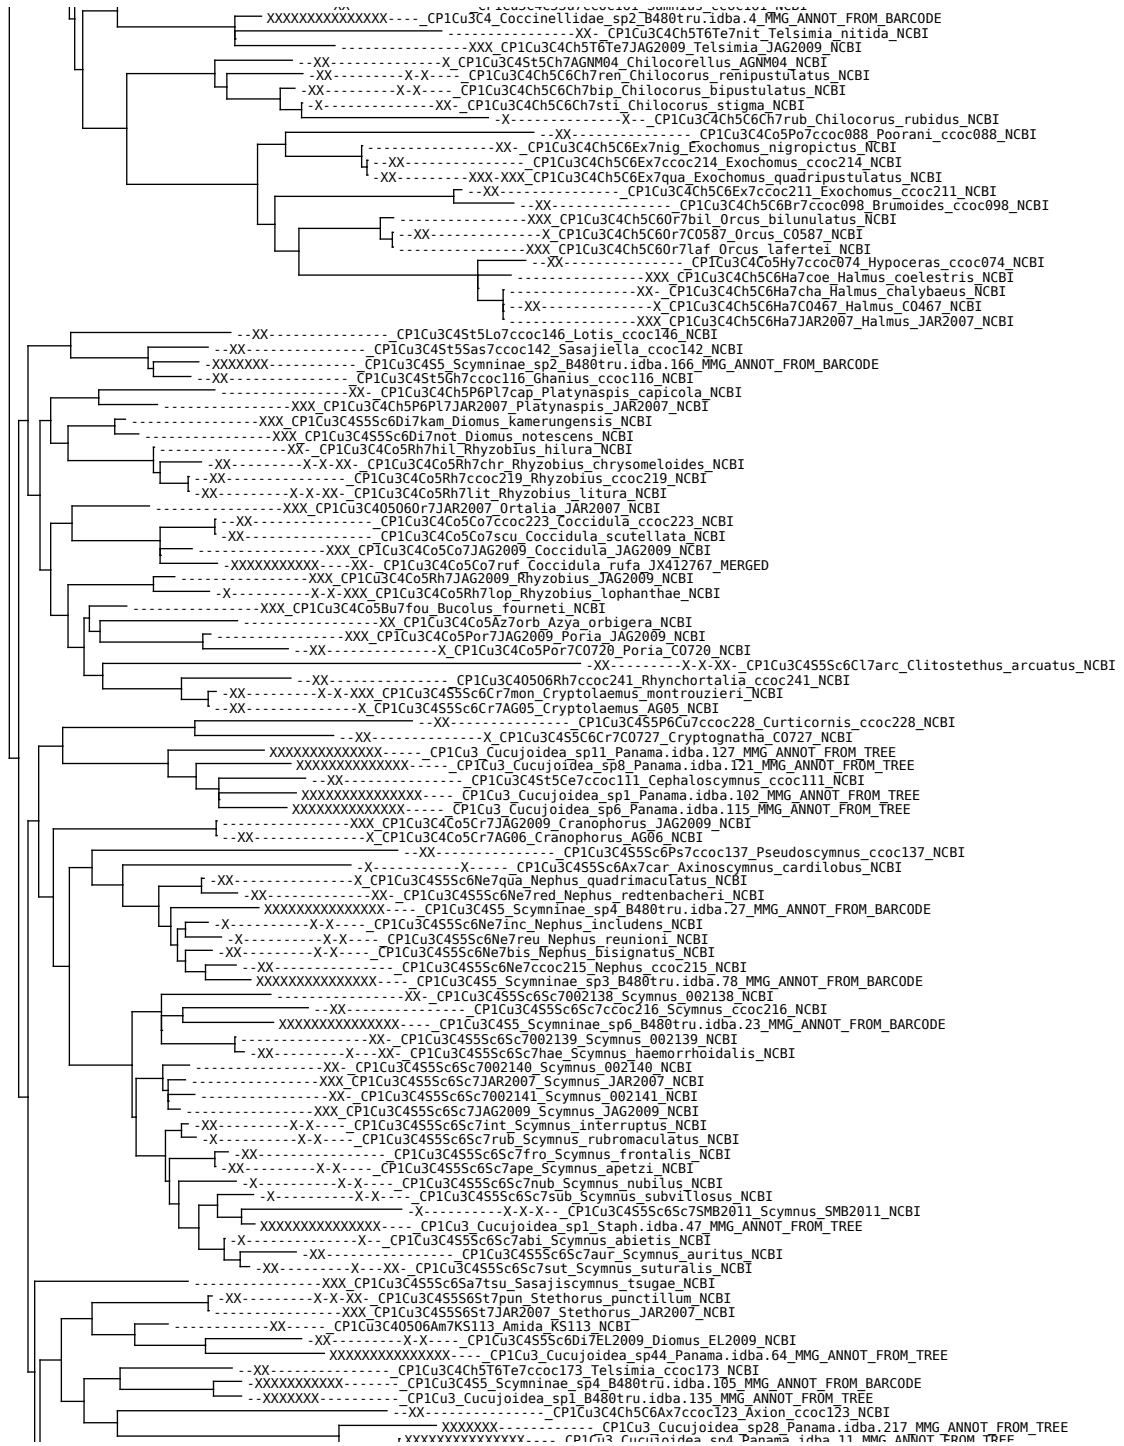

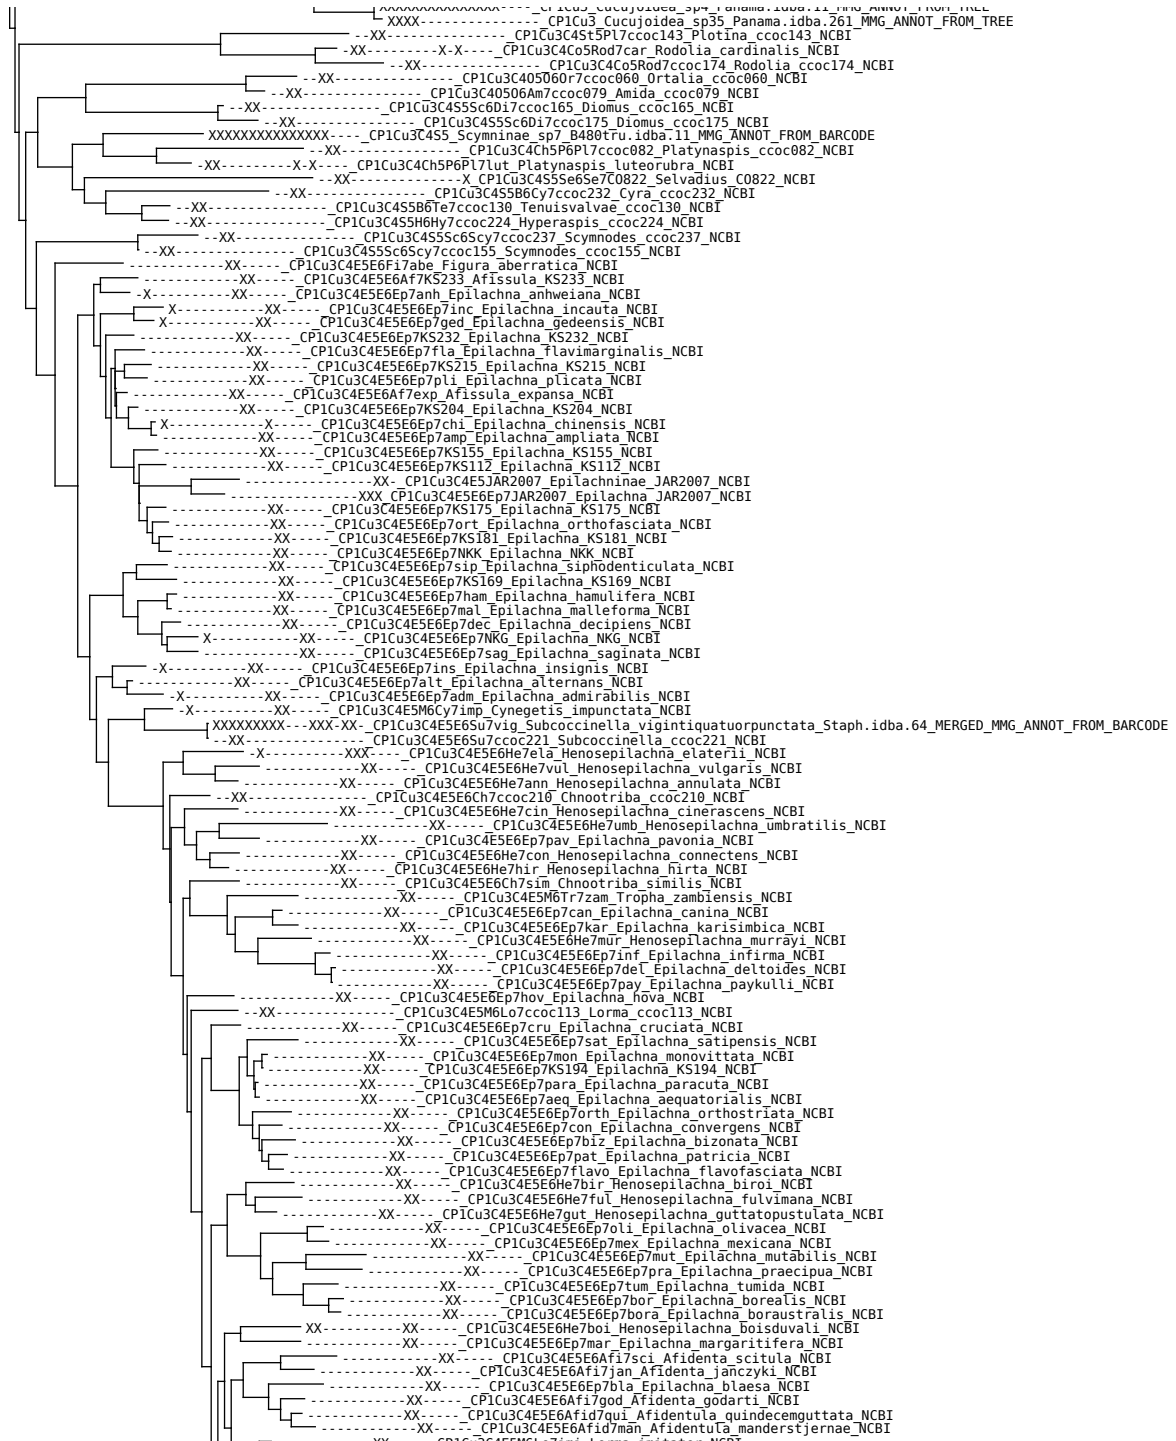



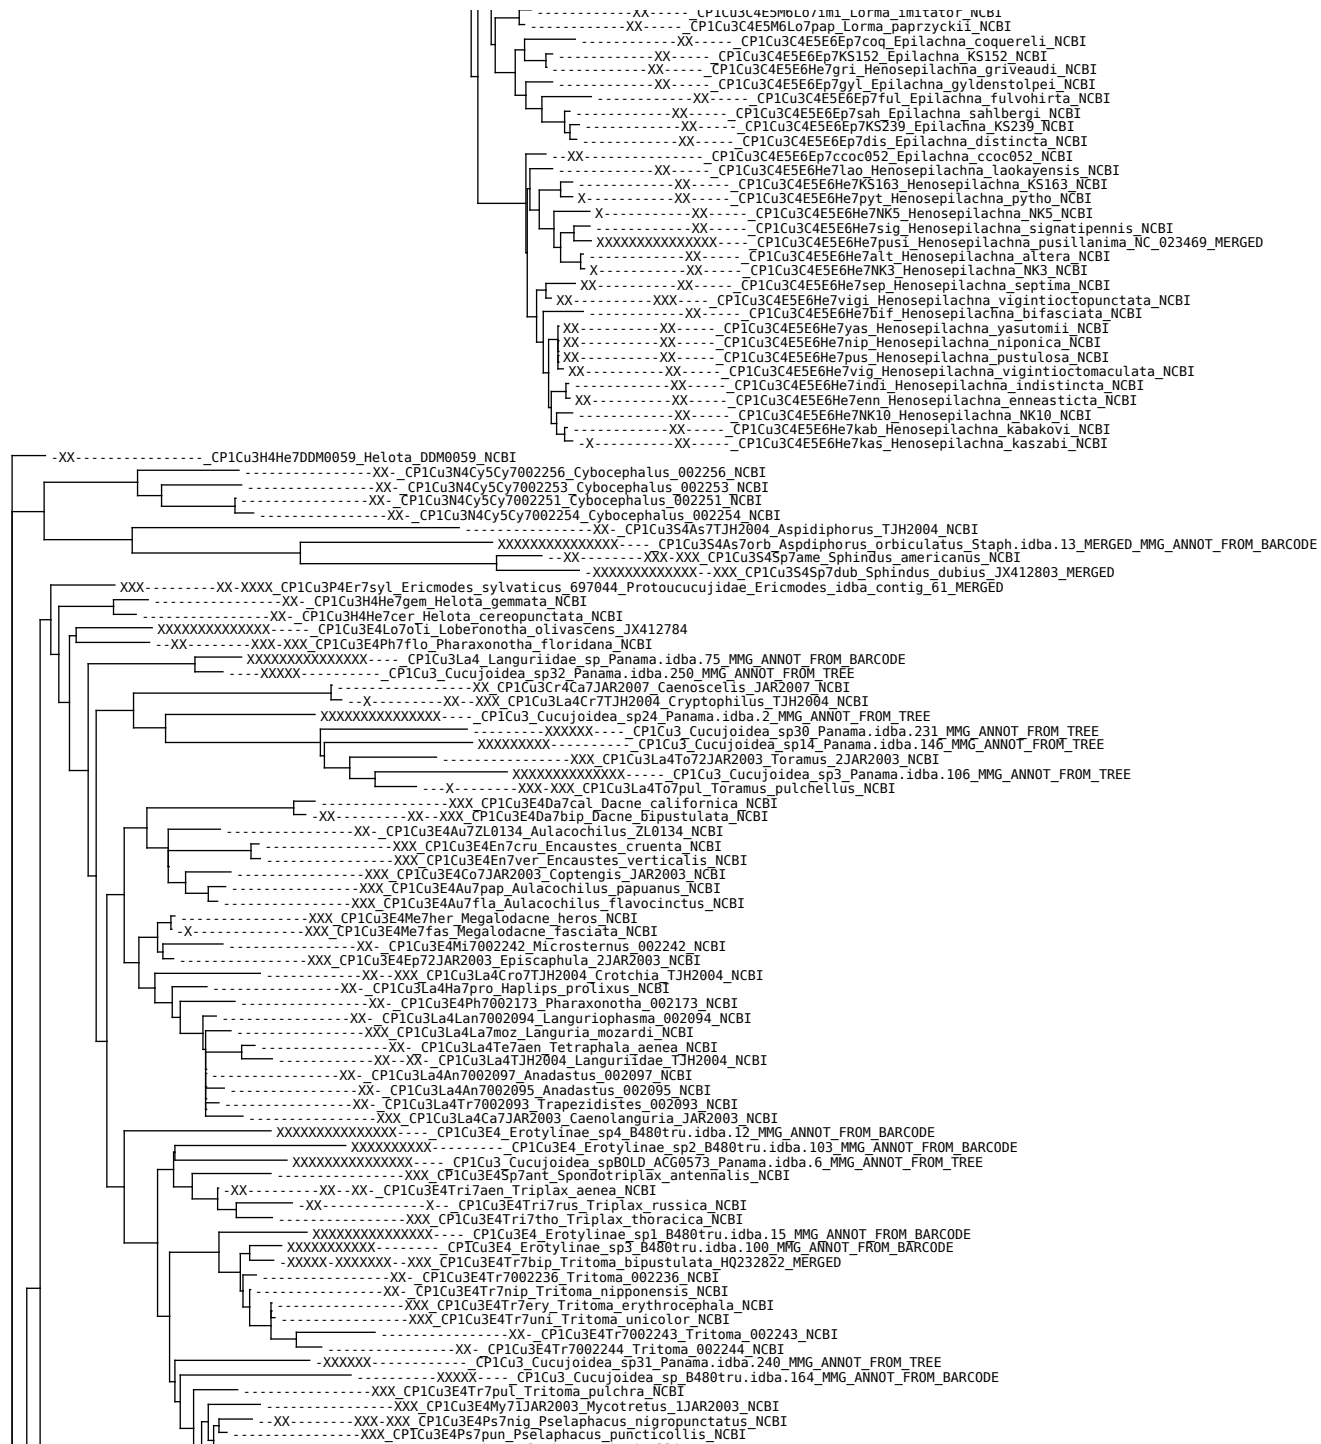

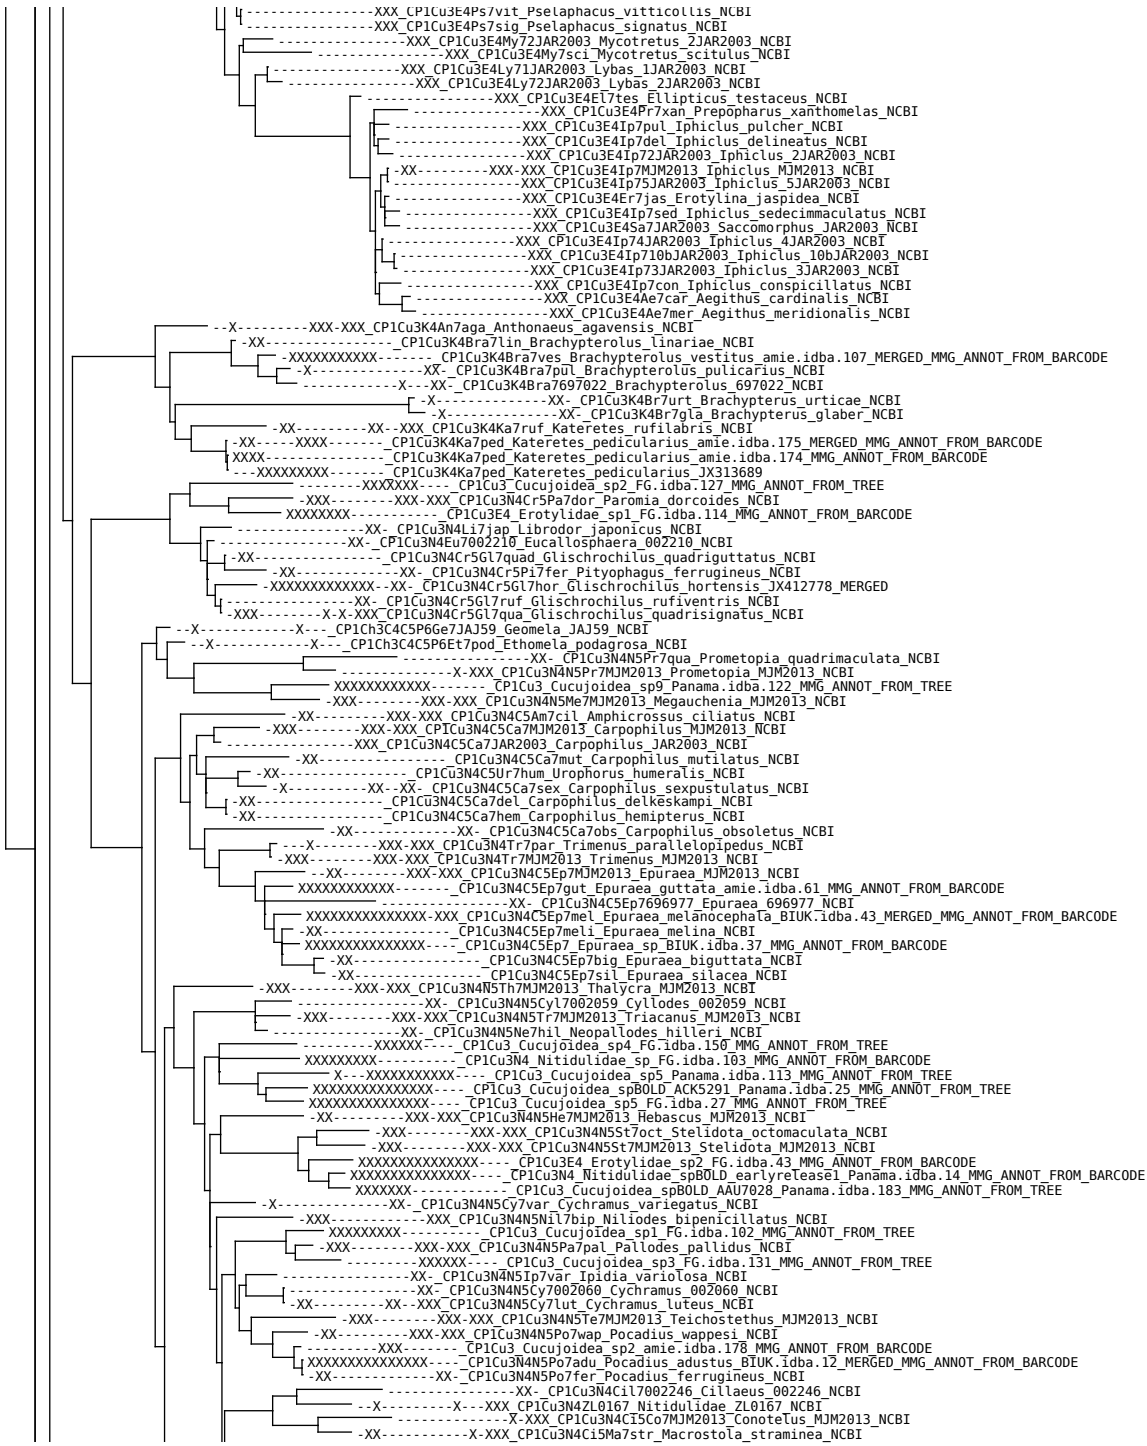

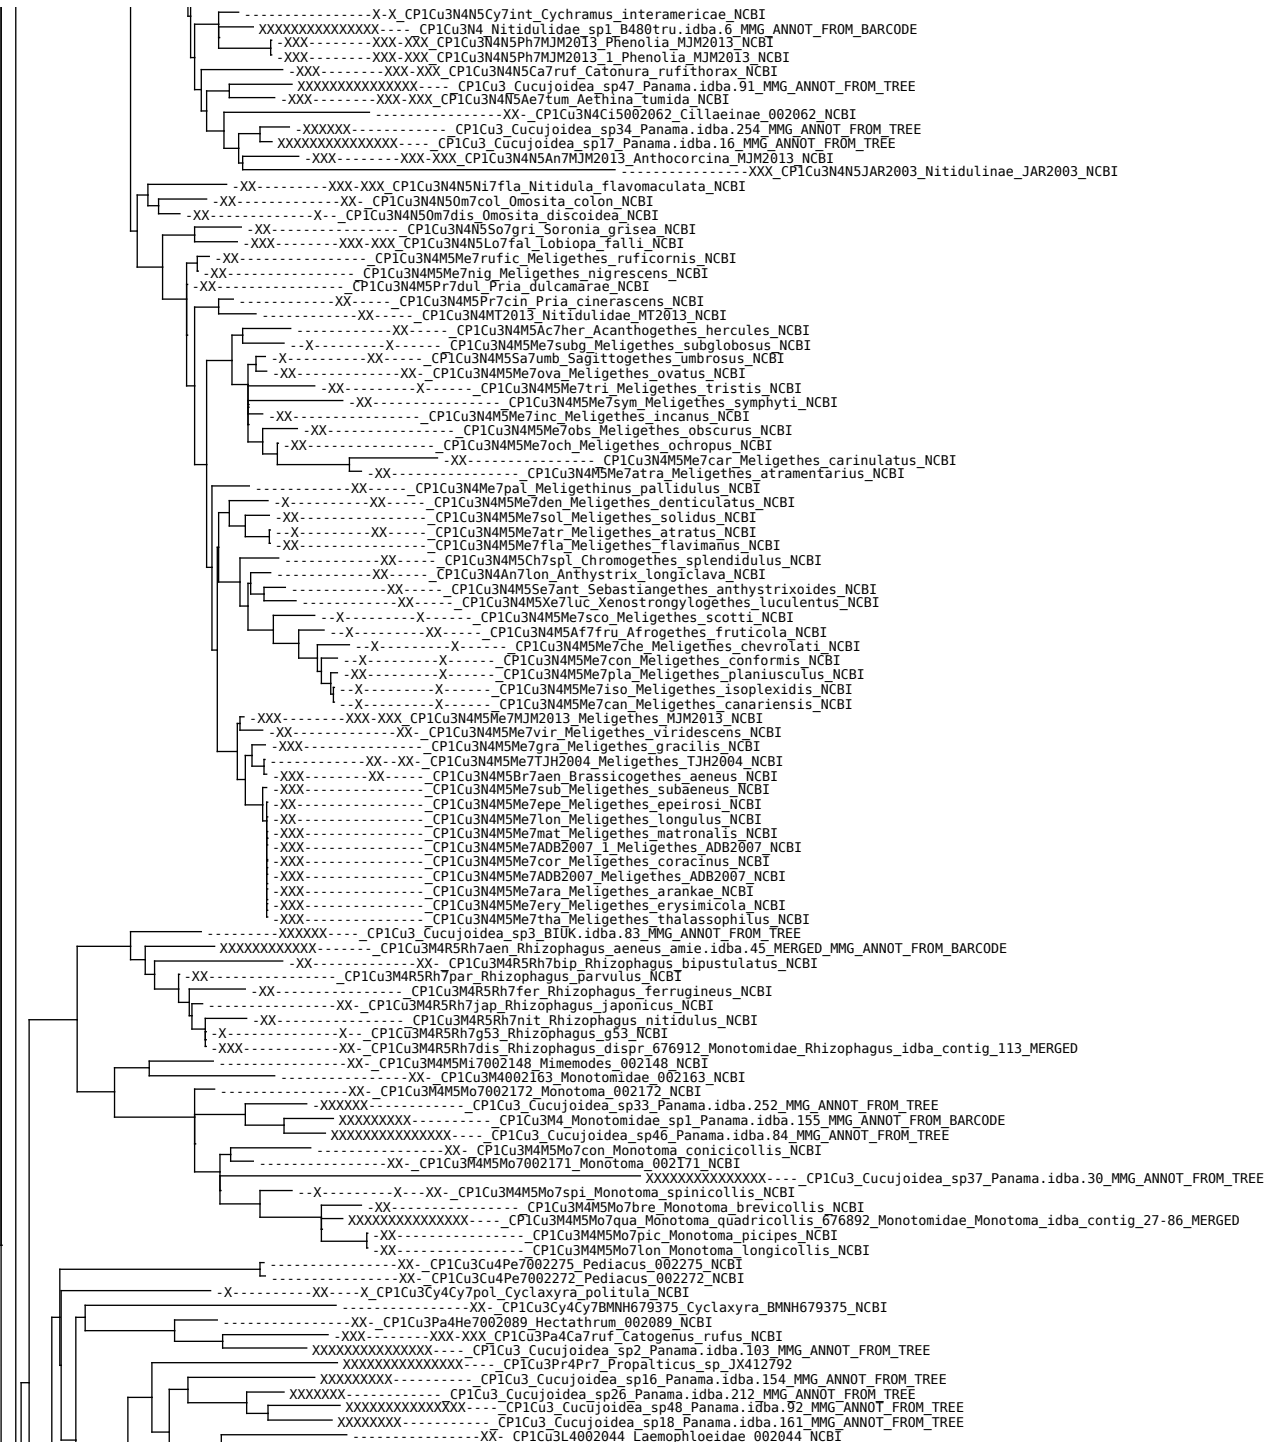

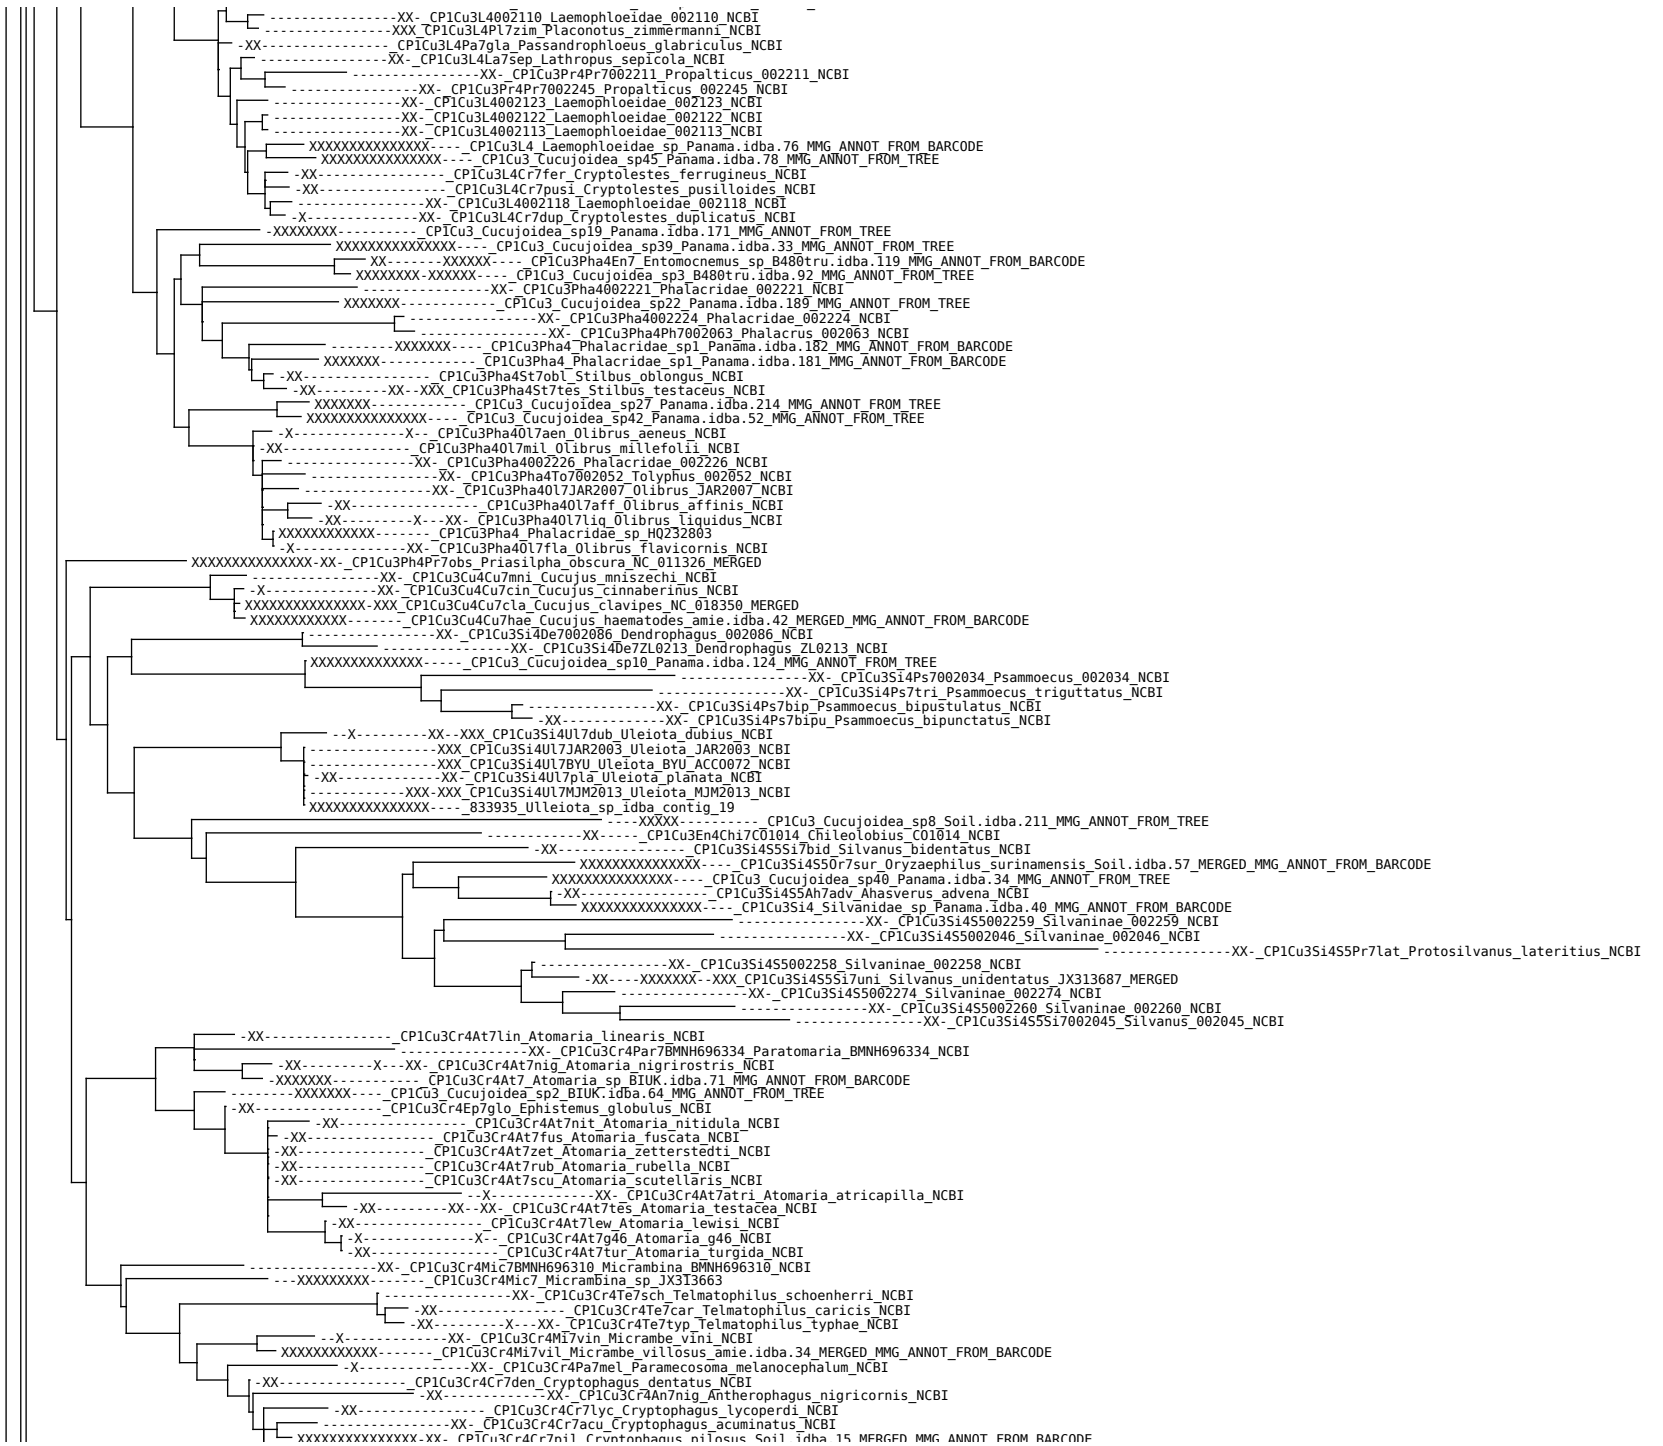

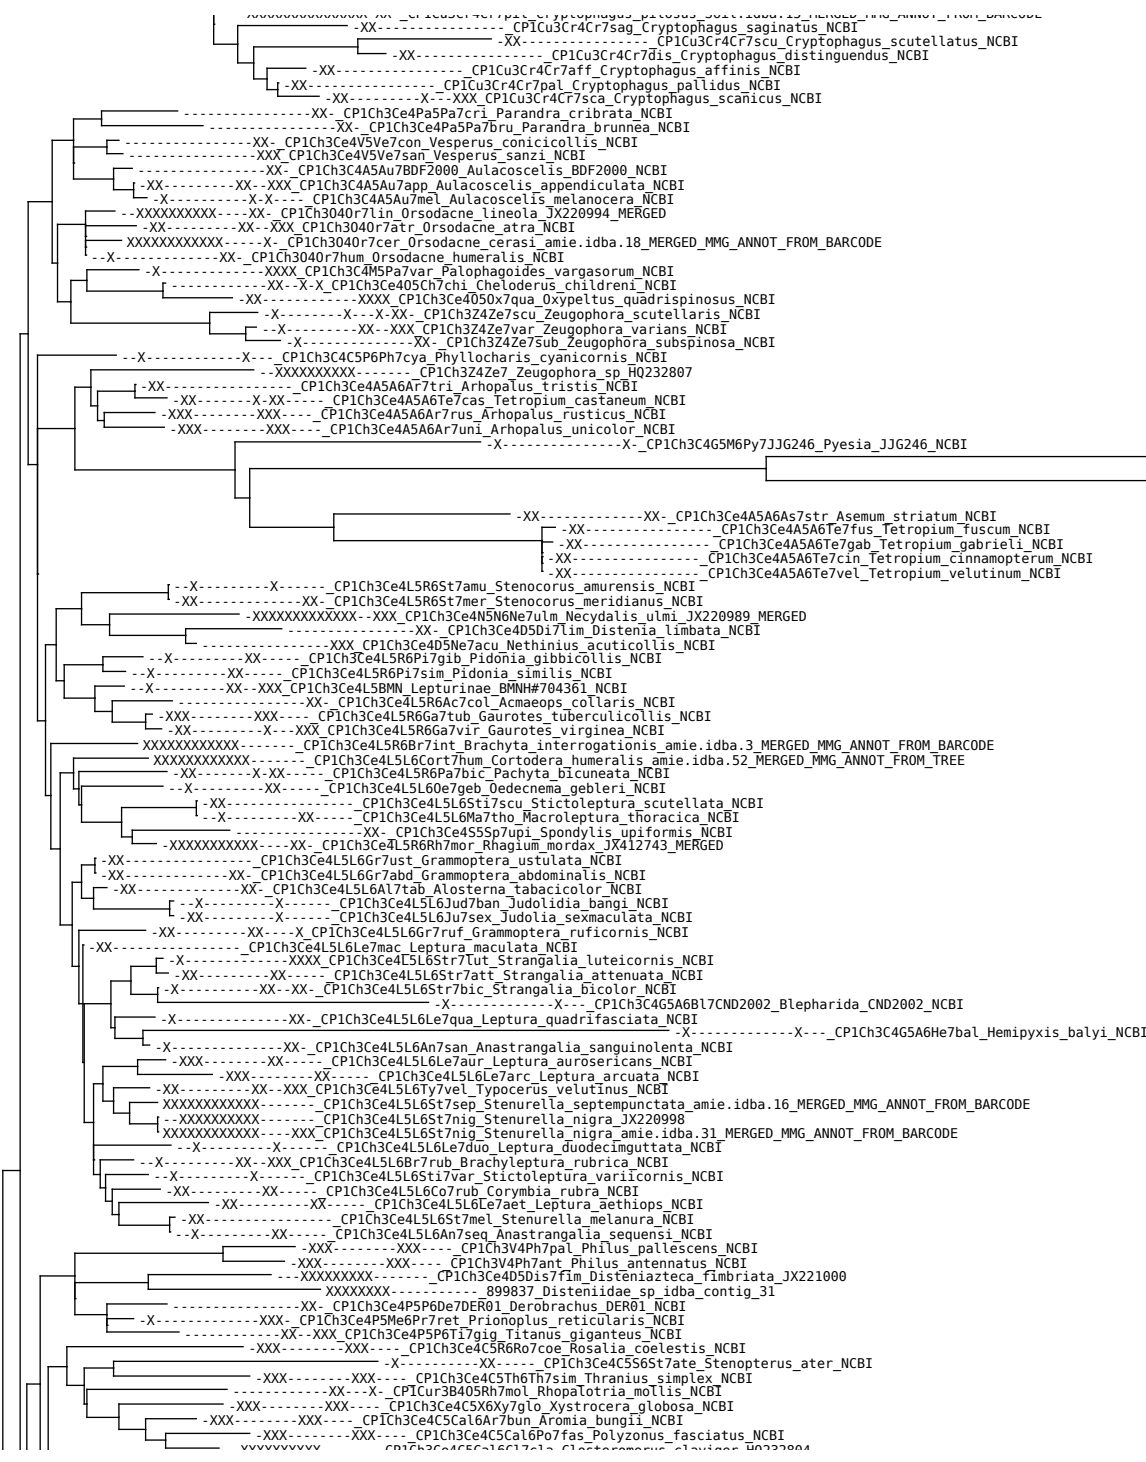

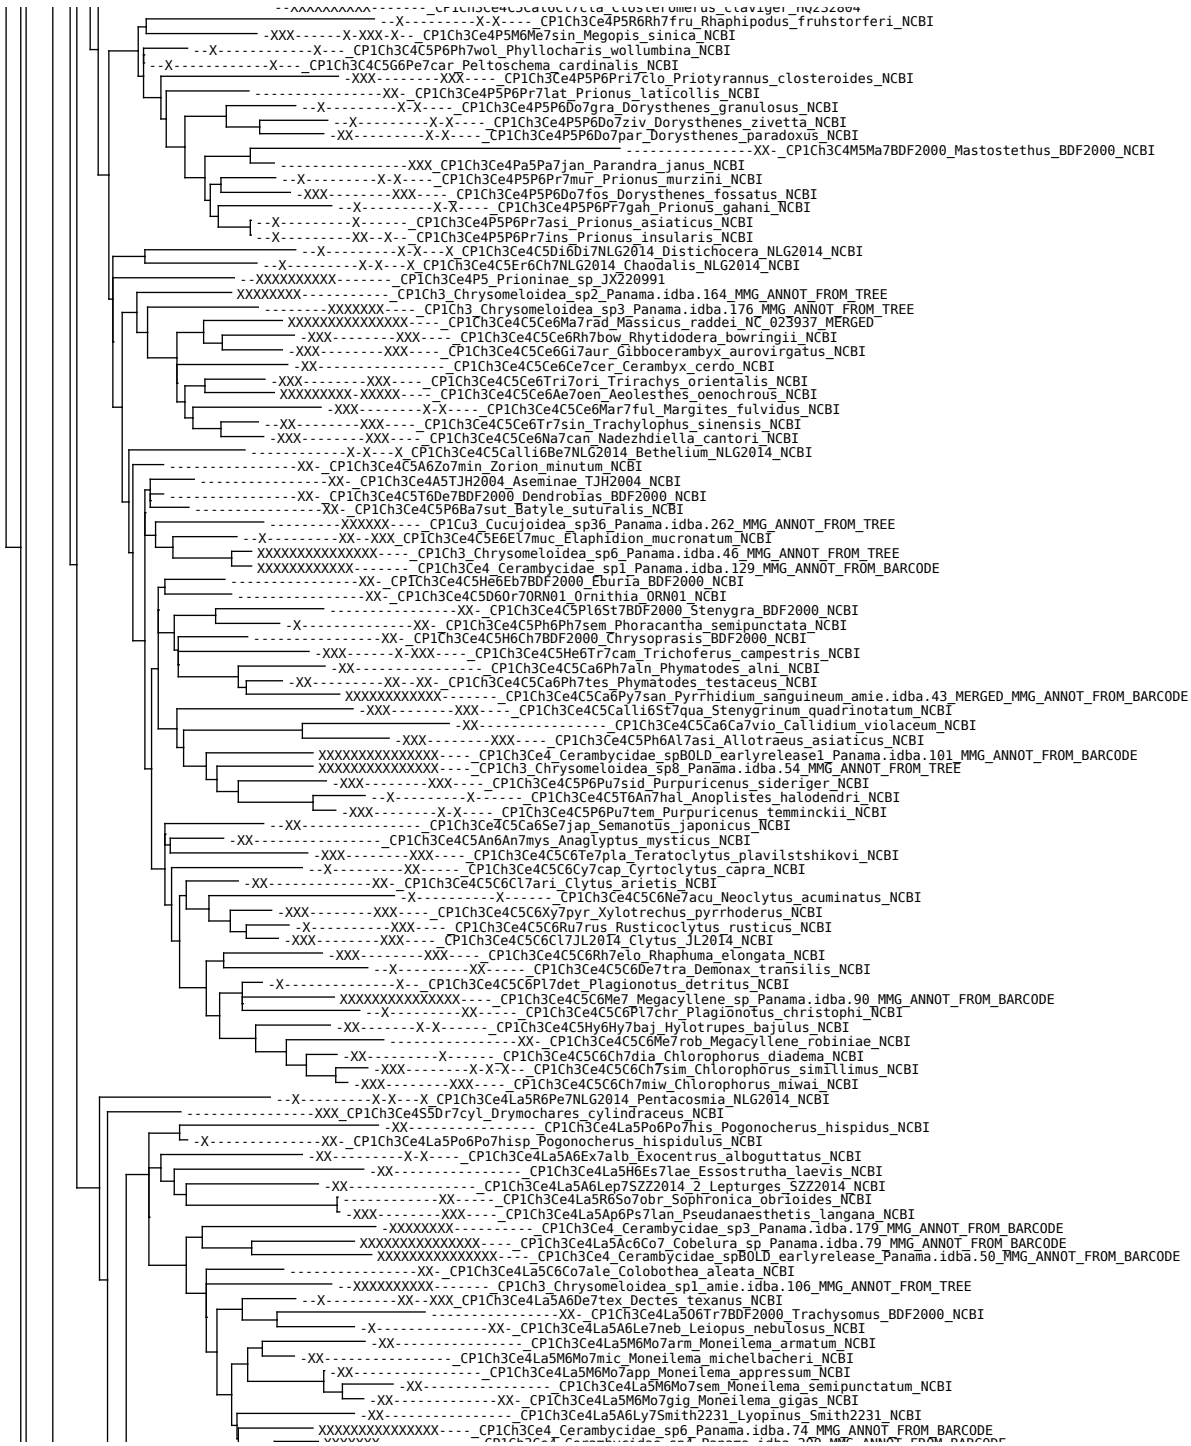

XXXXXXXXXXXXXXXXXXXX LPIInSte4 Cerambycidae sp4 Panama.idba.200 MMG ANNOT FROM BARCODE  
XXXXXXXXXXXXXXXXXXXX CP1Ch3Ce4 Cerambycidae sp7 Panama.idba.99 MMG ANNOT FROM BARCODE  
XXXXXXXXXXXX CP1Ch3Ce4La5 Lamiinae sp JX412849  
XXXXXXXXXXXX CP1Ch3 Chrysomeloidea sp2 B480tru.idba.102 MMG ANNOT FROM TREE  
XXXXXXXXXXXX CP1Ch3Ce4La5Ja7 Jamesia sp Panama.idba.253 MMG ANNOT FROM BARCODE  
XXXXXXXXXXXX CP1Ch3Ce4La5Ja7 Jamesia sp Panama.idba.224 MMG ANNOT FROM BARCODE  
XXXXXXXXXXXXXXXXXXXX CP1Ch3Ce4 Cerambycidae sp5 Panama.idba.43 MMG ANNOT FROM BARCODE  
XX CP1Ch3Ce4La5P6P17met Plectrura metallica NCBI  
XXXXX XXXX CP1Ch3 Chrysomeloidea sp3 B480tru.idba.114 MMG ANNOT FROM TREE  
XXXXX XXXX CP1Ch3 Chrysomeloidea sp7 B480tru.idba.157 MMG ANNOT FROM TREE  
XXXXXXXXXXXXXXXXXXXX CP1Ch3 Chrysomeloidea sp11 B480tru.idba.58 MMG ANNOT FROM TREE  
XXX XXX CP1Ch3Ce4La5Me6M7H1p Mephotypa diphysis NCBI  
XXXXXXXXXXXXXXXXXXXX CP1Ch3Ce4 Cerambycidae sp2 Panama.idba.136 MMG ANNOT FROM TREE  
XXXXXXXXXXXXXXXXXXXX CP1Ch3 Chrysomeloidea sp7 Panama.idba.48 MMG ANNOT FROM TREE  
XXX XXX CP1Ch3Ce4La5A6Ro7sap Rondibilis saperdina NCBI  
XXX XXX CP1Ch3Ce4La5Xy6Th7sim Thylactus simulans NCBI  
XX CP1Ch3Ce4La5D6Do7BDF2000 Dorcadion BDF2000 NCBI  
XXXXXXXXXXXX CP1Ch3 Chrysomeloidea sp5 B480tru.idba.130 MMG ANNOT FROM TREE  
XX XXX CP1Ch3Ce4La5Ag6Ag7car Agapanthia cardui NCBI  
X XXX CP1Ch3Ce4La5Ag6Ag7dau Agapanthia daurica NCBI  
XXX XXX CP1Ch3Ce4La5Ag6Ag7amu Agapanthia amurensis NCBI  
XXX XXX CP1Ch3Ce4La5Ag6Ph7rad Phelipara radovskyi NCBI  
XXXXXXXXXXXX CP1Ch3Ce4La5 Lamiinae sp1 B480tru.idba.124 MMG ANNOT FROM BARCODE  
XX CP1Ch3Ce4La5Hi6Po7pol Pothyne polyplicata NCBI  
XXX XXX X CP1Ch3Ce4La5Me6Me7myo Mesosa myops NCBI  
XX CP1Ch3Ce4La5Ac6Ac7lon Acrocinus longimanus NCBI  
XX XXX CP1Ch3Ce4La5Me6Me7JL2014 Mesosa JL2014 NCBI  
XXX XXX CP1Ch3Ce4La5Me6Me7irr Mesosa irrorata NCBI  
X XXX CP1Ch3Ce4La5L6Me7pub Mecynippus pubicornis NCBI  
XXX XXX CP1Ch3Ce4La5Me6Me7atr Mesosa atrostigma NCBI  
X X X CP1Ch3Ce4La5P6Pe7NLG2014 Penthea NLG2014 NCBI  
X X X CP1Ch3Ce4La5P6P7NLG2014 Prosoptus NLG2014 NCBI  
X X X CP1Ch3Ce4La5L6Ke7par Xenotelia pardalina NCBI  
XXX X X CP1Ch3Ce4La5Apo6Ro7sub Ropica subnotata NCBI  
XXXXXXXXXXXXXXXXXXXX CP1Ch3 Chrysomeloidea sp13 B480tru.idba.66 MMG ANNOT FROM TREE  
XXX XXX CP1Ch3Ce4La5Pt6Pt7rig Pterolophia rigida NCBI  
XXX XXX CP1Ch3Ce4La5Ph6Ph7com Phytocia comes NCBI  
XX CP1Ch3Ce4La5Ob6Ob7C38 Oberea C38 NCBI  
XXX XXX CP1Ch3Ce4La5Ob6Ob7fus Oberea fuscipennis NCBI  
XXX XXX CP1Ch3Ce4La5Ph6Ph7sib Phytocia sibirica NCBI  
XX CP1Ch3Ce4La5Ph6Ph7ruf Phytocia rufiventris NCBI  
X XXX CP1Ch3Ce4La5P6Ph7alg Phytocia algerica NCBI  
X XXX CP1Ch3Ce4La5S6S7tri Saperda tridentata NCBI  
X X X CP1Ch3Ce4La5S6G17rel Glenea relicta NCBI  
XXXXXXXXXXXXXXXXXXXX CP1Ch3Ce4La5 Lamiinae sp4 B480tru.idba.75 MMG ANNOT FROM BARCODE  
XXXXXXXXXXXXXXXXXXXX CP1Ch3Ce4La5 Lamiinae sp4 B480tru.idba.71 MMG ANNOT FROM BARCODE  
XX CP1Ch3Ce4La5S6Eu7met Eutetrappa metallescens NCBI  
XXX XXX CP1Ch3Ce4La5S6Pa7for Paraglenea fortunei NCBI  
XX CP1Ch3Ce4La5S6Th7geb Thyestilla gebleri NCBI  
XX CP1Ch3Ce4La5S6G17JL2014 Glenea JL2014 NCBI  
XX CP1Ch3Ce4La5S6S7poo Saperda populnea NCBI  
X CP1Ch3Ce4La5S6S7bal Saperda balsamifera NCBI  
XXX XXX CP1Ch3Ce4La5S6Ba7hor Batocera horsfieldi NCBI  
XXXXXXXXXXXXXXXXXXXX CP1Ch3Ce4La5S6Ba7lin Batocera lineolata NC\_022671 MERGED  
X X CP1Ch3Ce4La5B6Ap7yay Apriona yayeyamai NCBI  
X X CP1Ch3Ce4La5B6Ap7jap Apriona japonica NCBI  
XXX X XXX CP1Ch3Ce4La5B6Ap7ger Apriona germari NCBI  
XXX XX CP1Ch3Ce4La5L6Xen7bim Xenohammus bimaculatus NCBI  
X CP1Ch3Ce4La5Mo6Mo7sub Monochamus subfasciatus NCBI  
XX CP1Ch3Ce4La5Mo6Mo7mas Monochamus masaoi NCBI  
X CP1Ch3Ce4La5Mo6Mo7mar Monochamus maruokai NCBI  
XXX XXX CP1Ch3Ce4La5L6An7lur Anoplophora lurida NCBI  
XX CP1Ch3Ce4La5L6Do7yok Dolichoprosopus yokoyamai NCBI  
X CP1Ch3Ce4La5L6An7hor Anoplophora horsfieldi NCBI  
XXXXXXXXXXXXXXXXXXXX CP1Ch3Ce4La5L6An7g Anoplophora glabripennis NC\_008221 MERGED  
XXX XXX CP1Ch3Ce4La5L6An7mac Anoplophora macularia NCBI  
XXX XXX X CP1Ch3Ce4La5L6An7chi Anoplophora chinensis NCBI  
X CP1Ch3Ce4La5L6Pe7oki Peblephaeus okinawanus NCBI  
XXX XXX CP1Ch3Ce4La5L6La7got Lamiomimus gottschei NCBI  
X CP1Ch3Ce4La5Mo6Mo7gra Monochamus grandis NCBI  
XX CP1Ch3Ce4La5Mo6Mo7sal Monochamus saltuarius NCBI  
XXXXXXXXXXXXXXXXXXXX X CP1Ch3Ce4La5Mo6Mo7alt Monochamus alternatus NC\_024652 MERGED  
XXX XXX CP1Ch3Ce4La5Mo6Mo7sut Monochamus sutor NCBI  
XXX XXX CP1Ch3Ce4La5Mo6Mo7gal Monochamus galloprovincialis NCBI  
X CP1Ch3Ce4La5Mo6Mo7nit Monochamus nitens NCBI  
XX XXX CP1Ch3Ce4La5Mo6Mo7ros Monochamus rosenmuelleri NCBI  
XX CP1Ch3Ce4La5Mo6Mo7sar Monochamus sartor NCBI  
X CP1Ch3Ce4La5L6Ann7gri Annamanum griseolum NCBI  
X CP1Ch3Ce4La5L6Eu7rub Eupromus ruber NCBI  
X CP1Ch3Ce4La5L6Ur7bim Uraecha bimaculata NCBI  
XXX XXX CP1Ch3Ce4La5L6Ur7per Uraecha perplexa NCBI  
XX XXX CP1Ch3Ce4La5L6Ur7ang Uraecha angusta NCBI  
X CP1Ch3Ce4La5L6Ur7osh Uraecha oshimana NCBI  
XXX XXX CP1Ch3Ce4La5Do6O17cre Oteneccampus cretaceus NCBI  
XXX XXX CP1Ch3Ce4La5Do6O17cla Oteneccampus clarus NCBI  
XXXXXXXXXXXXXXXXXXXX CP1Ch3Ce4La5Ag6P7h1 Psacotheta hilaris NC\_013070 MERGED  
X CP1Ch3Ce4La5L6Mi7yay Mimorsidia yayeyamensis NCBI  
X CP1Ch3Ce4La5Mo6Ac7deg Acalolepta degener NCBI  
X CP1Ch3Ce4La5Mo6Ac7lux Acalolepta luxuriosa NCBI  
X CP1Ch3Ce4La5Mo6Ac7fra Acalolepta fraudatrix NCBI  
XX CP1Ch3Ce4La5Mo6Ac7sub Acalolepta sublusca NCBI  
XX CP1Ch3Ce4La5Mo6Mo7SZZ2013\_1 Monochamus SZZ2013 NCBI  
XX CP1Ch3Ce4La5Mo6Mo7SZZ2013 Monochamus SZZ2013 NCBI  
XXXXXXXXXXXX CP1Ch3 Chrysomeloidea sp4 Panama.idba.184 MMG ANNOT FROM TREE  
XX CP1Ch3Ce4La5T6P7vit Phaea vittata NCBI  
XX CP1Ch3Ce4La5T6P7mar Phaea maryannae NCBI  
XX CP1Ch3Ce4La5T6P7bip Phaea bipagiata NCBI  
XX CP1Ch3Ce4La5T6Te7dis Tetraopes discoideus NCBI  
XX CP1Ch3Ce4La5T6Te7umb Tetraopes umbonatus NCBI  
XX CP1Ch3Ce4La5T6Ph7mir Phaea mirabilis NCBI

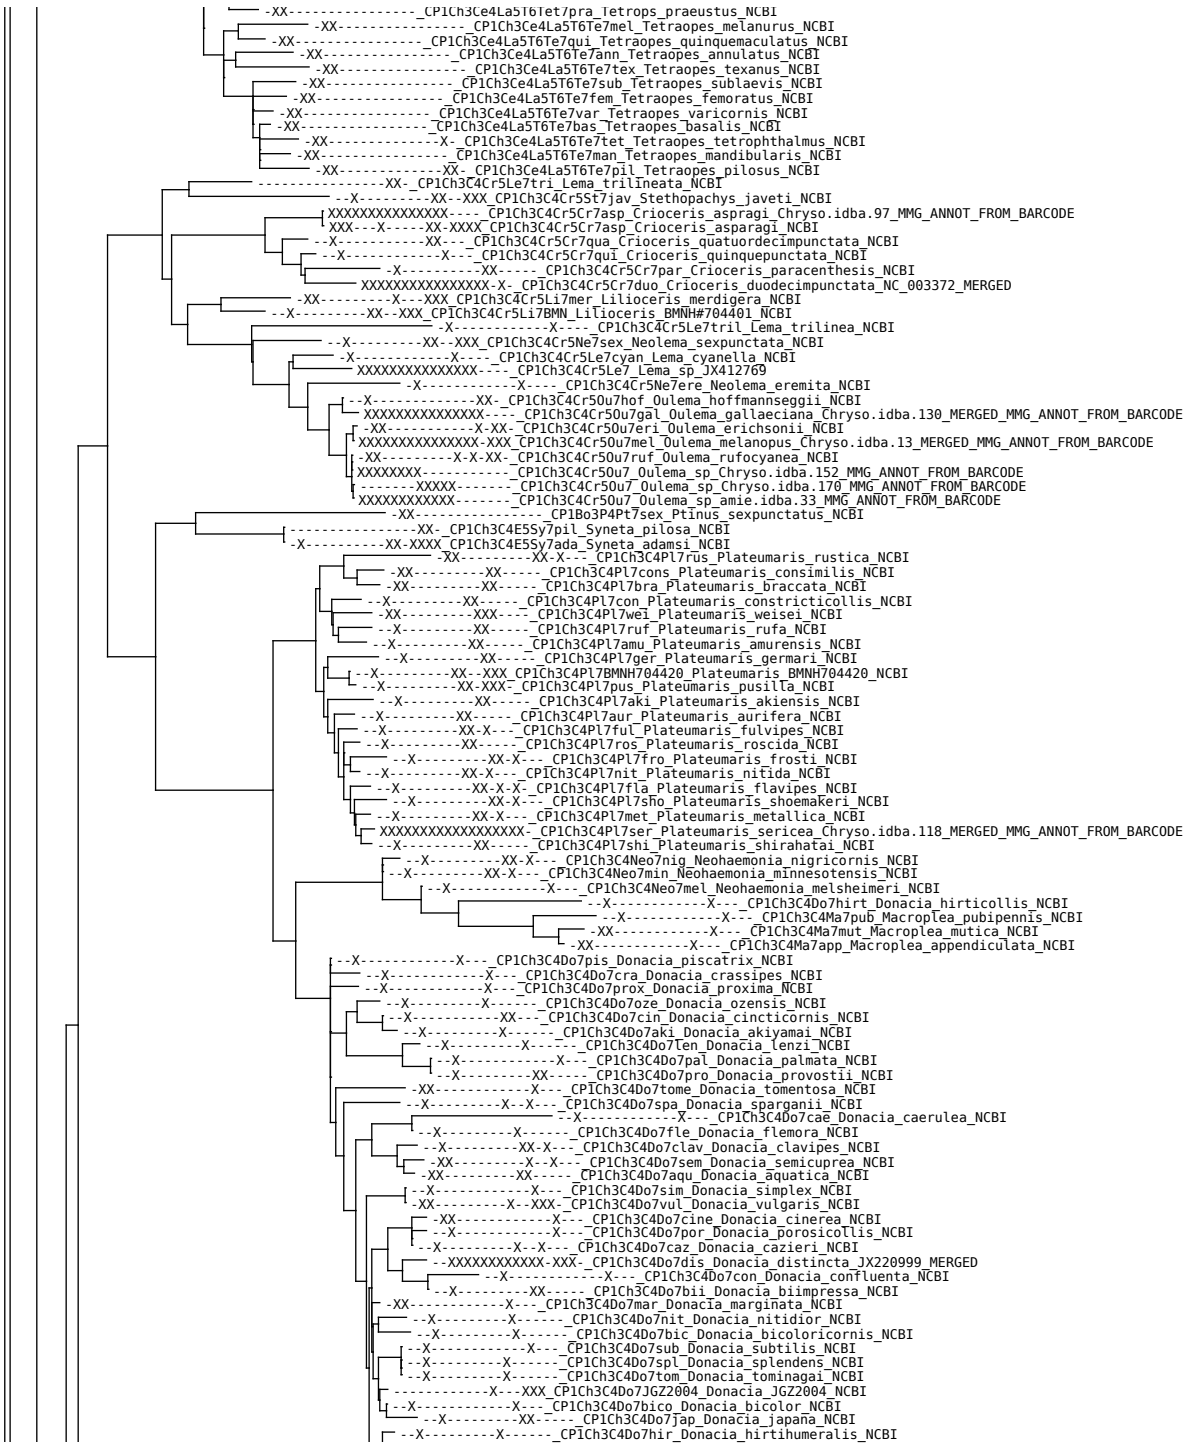



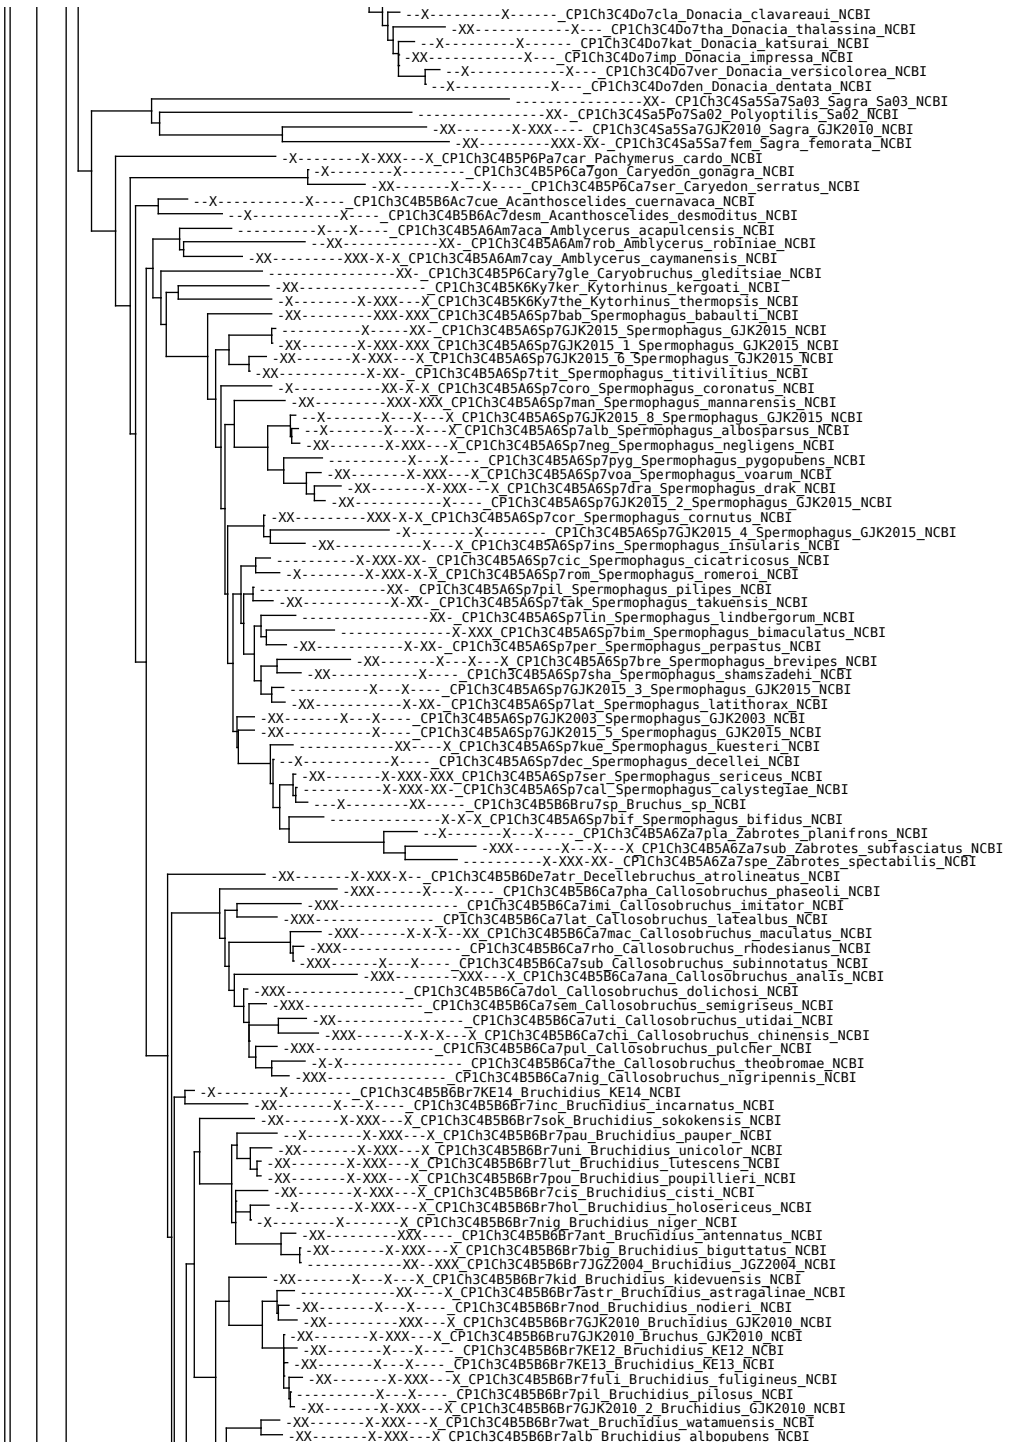

Phylogenetic tree showing relationships between various species, with labels such as CP1Ch3C4B5B6Me7jul Merobruchus julianus NCBI, CP1Ch3C4B5B6Br7nigr Bruchidius nigricornis NCBI, and CP1Ch3C4B5B6Br7ma Bruchidius malindiensis NCBI. The tree is rooted on the left and branches out to the right, with species names listed at the tips of the branches. The labels include accession numbers (e.g., CP1Ch3C4B5B6Me7jul) and species names (e.g., Merobruchus julianus NCBI). The tree shows a complex branching pattern, indicating the evolutionary relationships between these species. The labels are arranged in a way that corresponds to the branching structure, with some species having multiple labels indicating different accessions or related forms. The tree is a cladogram, where the length of the branches is not necessarily proportional to time, but the branching order represents the evolutionary relationships. The species names are written in a standard font, and the accession numbers are in a larger font. The tree is a black and white line drawing, with the branches represented by thin lines. The labels are placed to the right of the branches, and the tree is oriented vertically. The root of the tree is at the top left, and the branches extend downwards and to the right. The species names are listed in a single column, with each name corresponding to a specific branch. The tree is a detailed representation of the evolutionary relationships between these species, showing the common ancestry and the divergence of lineages over time. The labels are arranged in a way that is easy to read, and the tree is a clear and concise representation of the data. The tree is a valuable tool for understanding the evolutionary relationships between these species, and it provides a visual summary of the data. The tree is a complex structure, but it is easy to interpret, and it provides a clear and concise representation of the data. The tree is a valuable tool for understanding the evolutionary relationships between these species, and it provides a visual summary of the data. The tree is a complex structure, but it is easy to interpret, and it provides a clear and concise representation of the data. The tree is a valuable tool for understanding the evolutionary relationships between these species, and it provides a visual summary of the data.

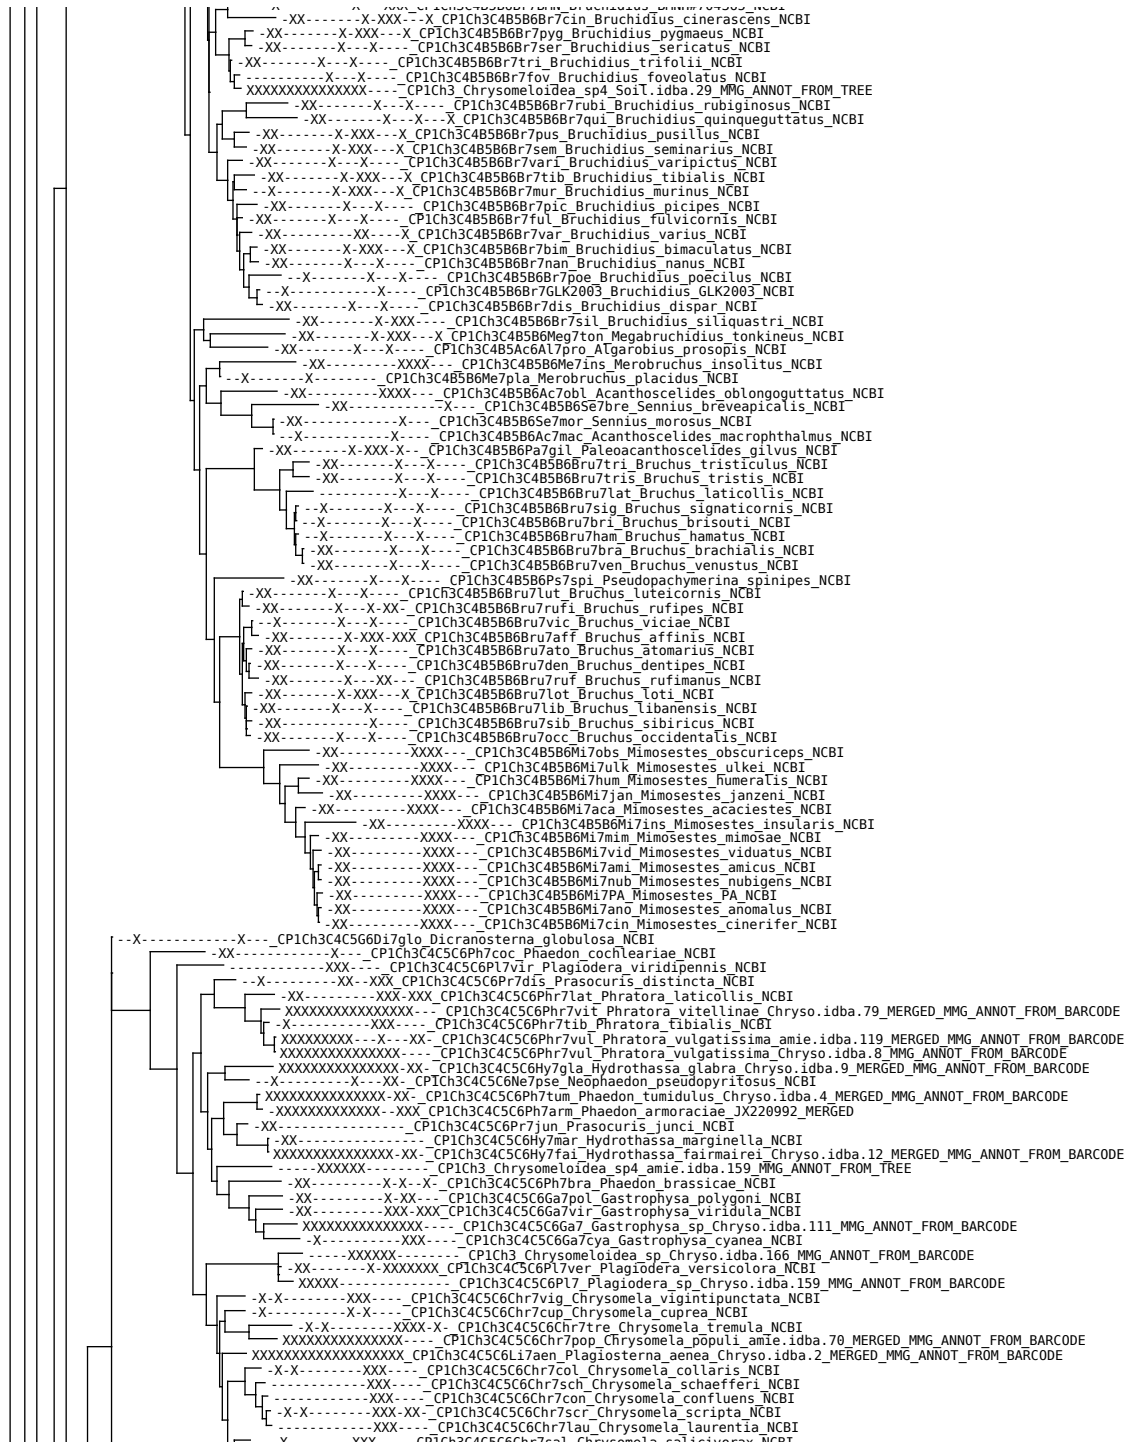

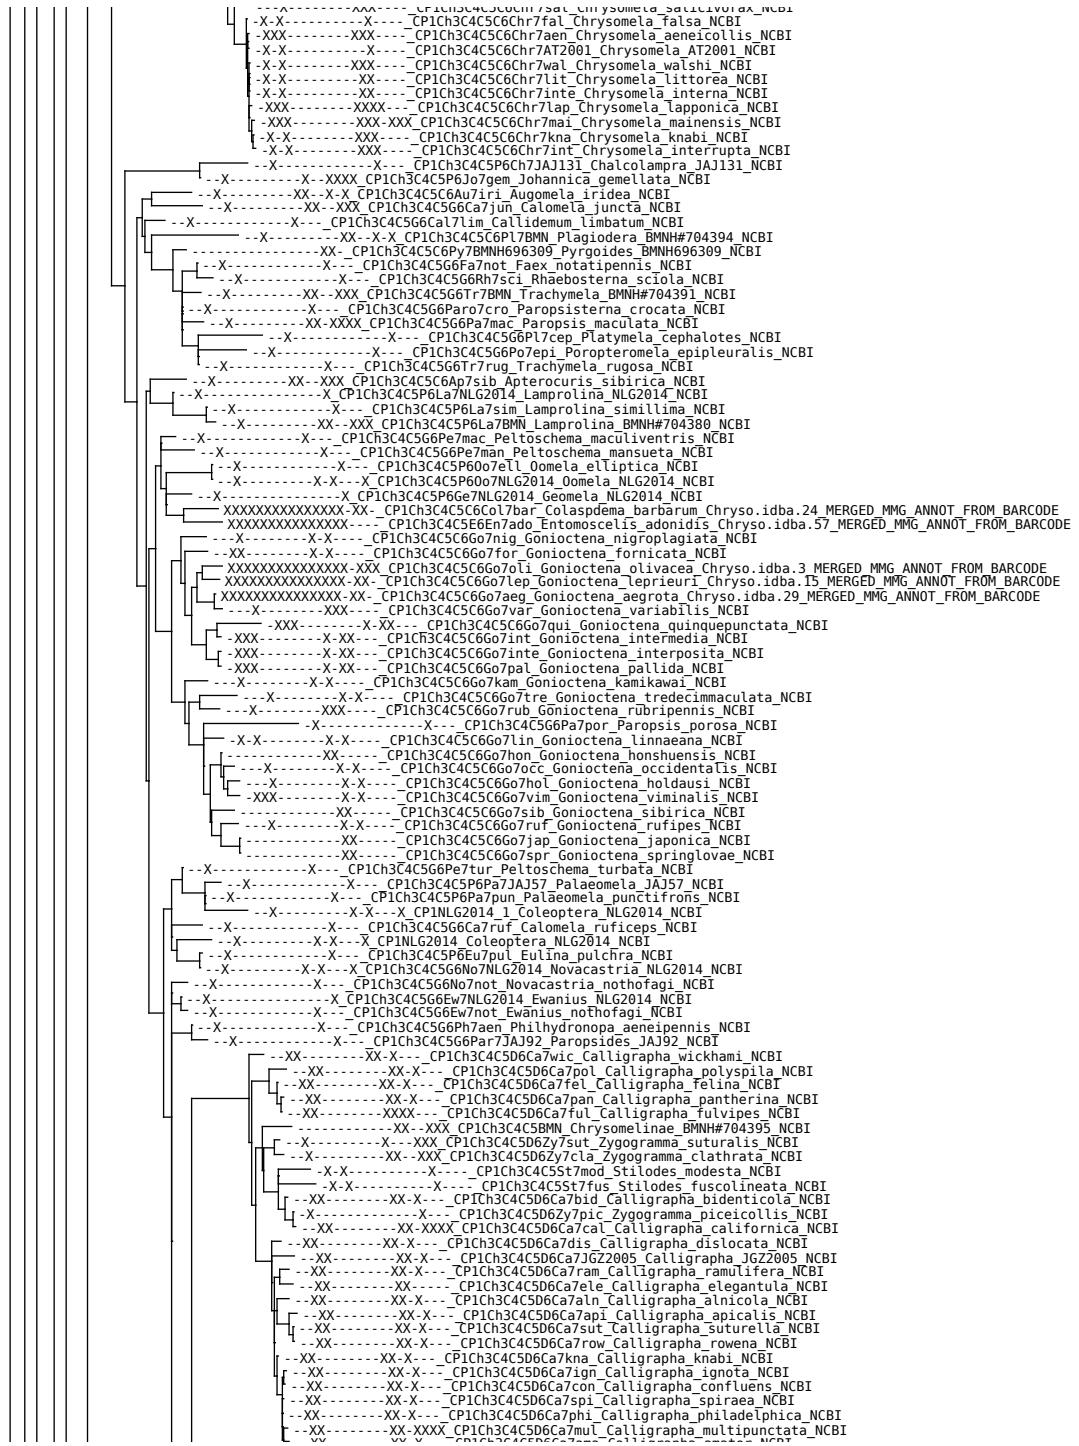

Phylogenetic tree showing relationships between various species, primarily focusing on the Chrysolinidae and Cyrtonus genera. The tree is rooted on the left and branches out to the right. Species names are listed on the right side of the tree, often followed by their NCBI accession numbers or other identifiers. The tree shows a complex branching pattern, indicating a diverse lineage. Key groups include Platypodidae (Platyphora), Chrysolinidae (Chrysolina, Oreina, Chrysolina), and Cyrtonus. The tree is annotated with various symbols (X, -) indicating specific characteristics or data points for each species. The species names are often followed by their NCBI accession numbers, such as CP1Ch3C4C5D6Ca7sca for Calligrapha scalaris and CP1Ch3C4C5C6Ch7pau for Cyrtonus plumbeus. The tree is a detailed representation of the evolutionary relationships between these species, showing their common ancestry and divergence points.

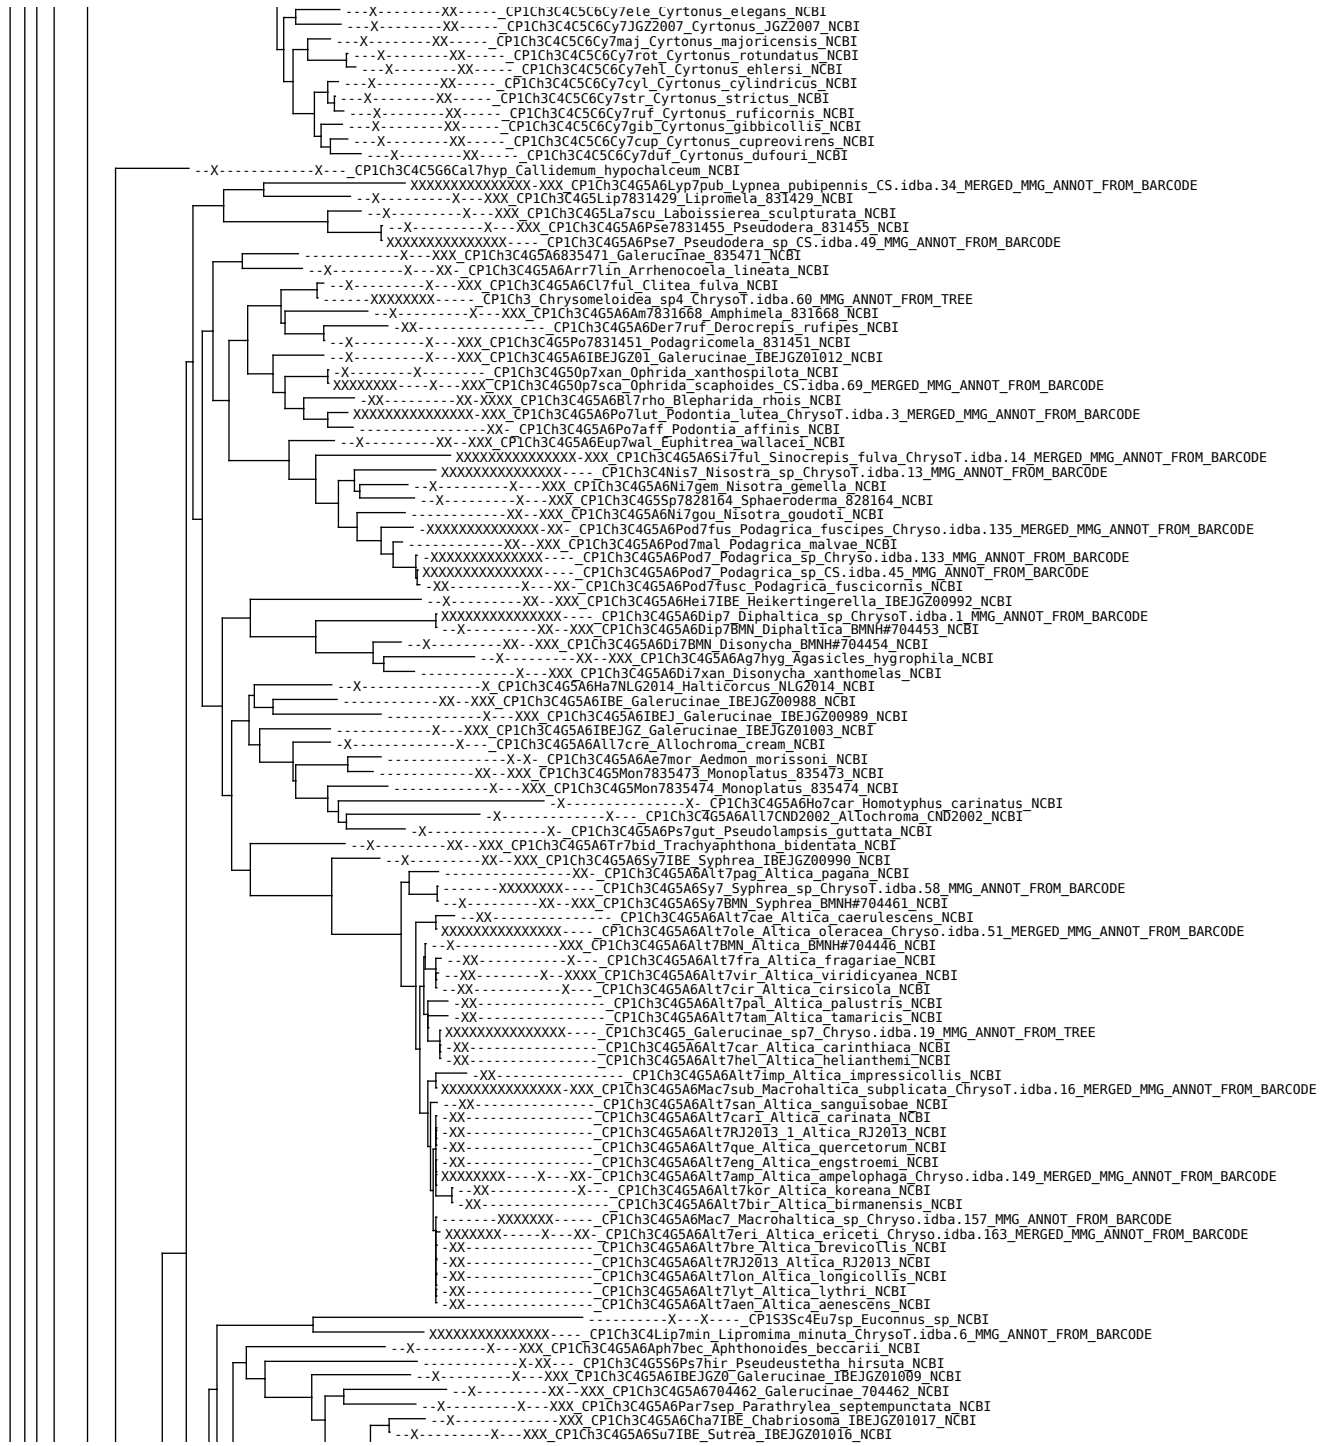

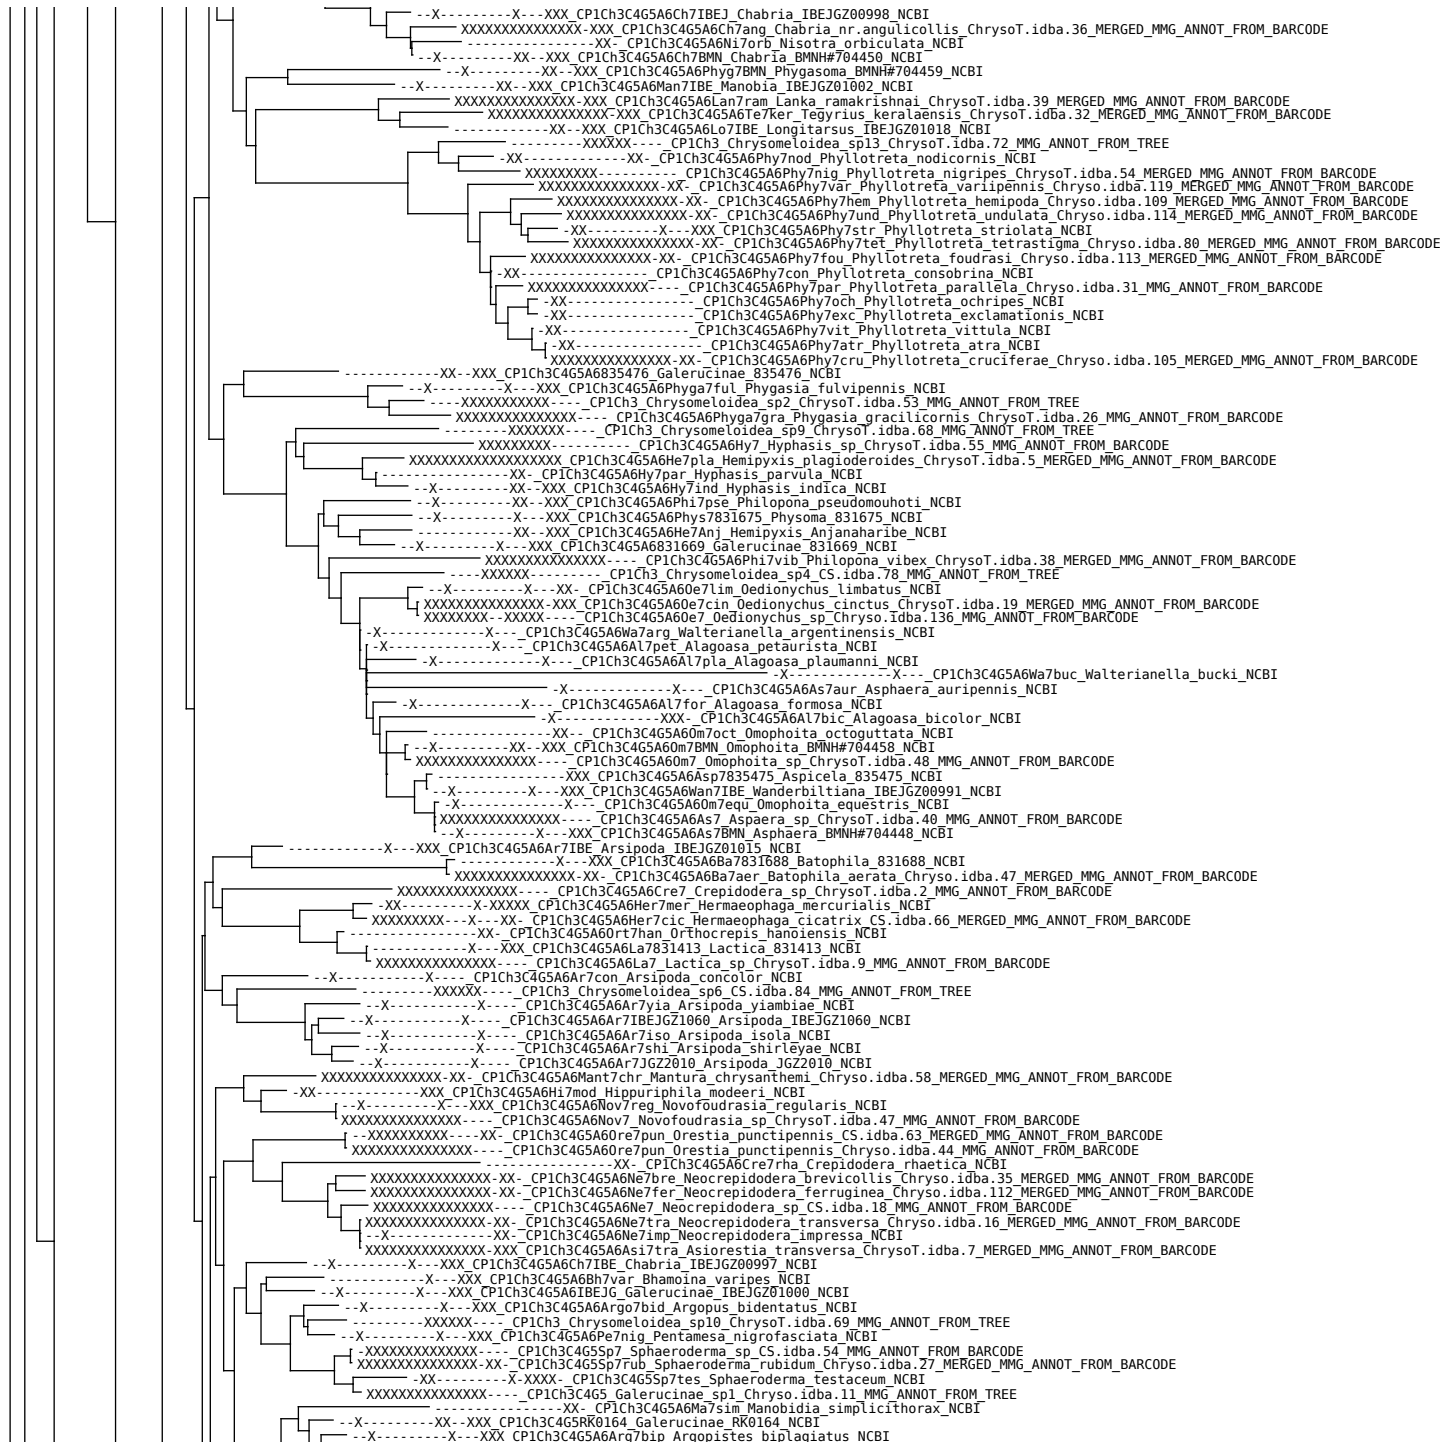

XXXXXXXXXXXXXXXXX--- CP1Ch3C4G5A6Arg7 Argopistes\_sp.ChrysoT.idba.15\_MMG\_ANNOT\_FROM\_BARCODE  
XXXXXXXXXXXXXXXXX-XX- CP1Ch3C4G5A6Ap7orb Apteropeda\_orbiculata Chryso.idba.18\_MERGED\_MMG\_ANNOT\_FROM\_BARCODE  
XXXXXXXXXXXXXXXXX-XX- CP1Ch3C4G5A6Ap7ovu Apteropeda\_ovulum Chryso.idba.23\_MERGED\_MMG\_ANNOT\_FROM\_BARCODE  
-----X-XX- CP1Ch3C4G5A6Ja7835069 Jacobyana\_835069 NCBI  
-----X-XX- CP1Ch3C4G5A6b17foe Dibolia\_foersteri NCBI  
-X-XX- CP1Ch3C4G5A6b17fibe Dibolia\_fibicola IBIC3Z00982 NCBI  
XXXXXXXXXXXXXXXXX-XX- CP1Ch3C4G5A6D1b7oc Dibolia\_occultans Chryso.idba.132\_MERGED\_MMG\_ANNOT\_FROM\_BARCODE  
-XX- CP1Ch3C4G5A6D1b7sch Dibolia\_schillingii NCBI  
XXXXXXXXXXXXXXXXX- CP1Ch3C4G5A6D1b7rug Dibolia\_rugulosa\_amei.idba.94\_MERGED\_MMG\_ANNOT\_FROM\_BARCODE  
-X- CP1Ch3C4G5A6S7bif Systena\_bifasciata NCBI  
-X-XXX- CP1Ch3C4G5A6S7b1a Systena\_blanda NCBI  
XXXXXXXXXXXXXXXXX-XXX- CP1Ch3C4G5A6Aph77col Aphthonomorpha\_collaris ChrysoT.idba.34\_MERGED\_MMG\_ANNOT\_FROM\_BARCODE  
-XX- CP1Ch3C4G5A6Aph77czw Aphthona\_czwalinae NCBI  
-XXX- CP1Ch3C4G5A6Aph77cyp Aphthona\_cyparissiae NCBI  
-XX- CP1Ch3C4G5A6Aph77fla Aphthona\_flava NCBI  
-X-XX- CP1Ch3C4G5A6Aph77dep Aphthona\_depressa NCBI  
-X-XX- CP1Ch3C4G5A6G17cya Glyptina\_cyanipennis NCBI  
XXXXXXXXXXXXXXXXX- CP1Ch3C4G5A6Aph77lut Aphthona\_lutescens Chryso.idba.103\_MERGED\_MMG\_ANNOT\_FROM\_BARCODE  
XXXXXXXXXXXXXXXXX-XX- CP1Ch3C4G5A6Aph77eup Aphthona\_euphorbiae Chryso.idba.42\_MERGED\_MMG\_ANNOT\_FROM\_BARCODE  
-X-XXX- CP1Ch3C4G5A6Aph77str Aphthona\_strigosa NCBI  
XXXXXXXXXXXXXXXXX-XX- CP1Ch3C4G5A6Aph77alb Aphthona\_albertinae Chryso.idba.48\_MERGED\_MMG\_ANNOT\_FROM\_BARCODE  
-XX- CP1Ch3C4G5A6Aph77ven Aphthona\_venustula NCBI  
-XX- CP1Ch3C4G5A6Aph77non Aphthona\_nonstriata NCBI  
XXXXXXXXXXXXXXXXX-XX- CP1Ch3C4G5A6Aph77mel Aphthona\_melanholica Chryso.idba.71\_MERGED\_MMG\_ANNOT\_FROM\_BARCODE  
-X-XX- CP1Ch3C4G5A6Lo7niger Longitarsus\_niger NCBI  
XXXXXXXXXXXXXXXXX- CP1Ch3C4G5A6Galerucinae\_sp8 Chryso.idba.34\_MMG\_ANNOT\_FROM\_TREE  
-X-XX- CP1Ch3C4G5A6Lo7ala Longitarsus\_platensis NCBI  
XXXXXXXXXXXXXXXXX-XX- CP1Ch3C4G5A6Lo7mel Longitarsus\_melanocephalus Chryso.idba.26\_MERGED\_MMG\_ANNOT\_FROM\_BARCODE  
XXXXXXXXXXXXXXXXX-XX- CP1Ch3C4G5A6Lo7aen Longitarsus\_aeneus Chryso.idba.115\_MERGED\_MMG\_ANNOT\_FROM\_BARCODE  
XXXXXXXXXXXXXXXXX- CP1Ch3C4G5A6Lo7mem Longitarsus\_membranaceus Chryso.idba.45\_MERGED\_MMG\_ANNOT\_FROM\_BARCODE  
-X-XX- CP1Ch3C4G5A6Lo7fer Longitarsus\_ferruginipennis NCBI  
-XX- CP1Ch3C4G5A6Lo7min Longitarsus\_minusculus NCBI  
-X-XX- CP1Ch3C4G5A6Lo7sen Longitarsus\_sencieri NCBI  
XXXXXXXXXXXXXXXXX- CP1Ch3C4G5A6Lo7can Longitarsus\_candidulus Chryso.idba.73\_MMG\_ANNOT\_FROM\_BARCODE  
-XX- CP1Ch3C4G5A6Lo7bal Longitarsus\_ballotae NCBI  
-XX- CP1Ch3C4G5A6Lo7rei Longitarsus\_reichei NCBI  
-X-XX- CP1Ch3C4G5A6Lo7sal Longitarsus\_salviae NCBI  
XXXXXXXXXXXXXXXXX-XX- CP1Ch3C4G5A6Lo7tab Longitarsus\_tabidus Chryso.idba.86\_MERGED\_MMG\_ANNOT\_FROM\_BARCODE  
XXXXXXXXXXXXXXXXX-XX- CP1Ch3C4G5A6Lo7rut Longitarsus\_rutilus Chryso.idba.61\_MERGED\_MMG\_ANNOT\_FROM\_BARCODE  
-X-XX- CP1Ch3C4G5A6Lo7nigr Longitarsus\_nigrofasciatus NCBI  
XXXXXXXXXXXXXXXXX- CP1Ch3C4G5A6Lo7nig Longitarsus\_nigrofasciatus Chryso.idba.89\_MERGED\_MMG\_ANNOT\_FROM\_BARCODE  
-XX- CP1Ch3C4G5A6Lo7och Longitarsus\_ochroleucus NCBI  
-X-XX- CP1Ch3C4G5A6Lo7NLG2014 Longitarsus\_NLG2014 NCBI  
XXXXXXXXXXXXXXXXX- CP1Ch3C4G5A6Lo7cur Longitarsus\_curtus Chryso.idba.74\_MMG\_ANNOT\_FROM\_BARCODE  
XXXXXXXXXXXXXXXXX-XXX- CP1Ch3C4G5A6Lo7exs Longitarsus\_exsoletus Chryso.idba.102\_MERGED\_MMG\_ANNOT\_FROM\_BARCODE  
XXXXXXXXXXXXXXXXX-XX- CP1Ch3C4G5A6Lo7cer Longitarsus\_cerinthus Chryso.idba.50\_MERGED\_MMG\_ANNOT\_FROM\_BARCODE  
XXXXXXXXXXXXXXXXX- CP1Ch3C4G5A6Galerucinae\_sp2 Chryso.idba.141\_MMG\_ANNOT\_FROM\_TREE  
XXXXXXXXXXXXXXXXX-XX- CP1Ch3C4G5A6Lo7ord Longitarsus\_ordinatus Chryso.idba.106\_MERGED\_MMG\_ANNOT\_FROM\_BARCODE  
XXXXXXXXXXXXXXXXX-XX- CP1Ch3C4G5A6Lo7pra Longitarsus\_pratensis Chryso.idba.127\_MERGED\_MMG\_ANNOT\_FROM\_BARCODE  
XXXXXXXXXXXX-XX-XX- CP1Ch3C4G5A6Lo7par Longitarsus\_parvulus Chryso.idba.145\_MERGED\_MMG\_ANNOT\_FROM\_BARCODE  
-XXXXXXXX- CP1Ch3C4G5A6Galerucinae\_sp6 Chryso.idba.169\_MMG\_ANNOT\_FROM\_TREE  
XXXXXXXXXXXXXXXXX-XX- CP1Ch3C4G5A6Lo7lur Longitarsus\_luridus Chryso.idba.72\_MERGED\_MMG\_ANNOT\_FROM\_BARCODE  
XXXXXXXXXXXXXXXXX- CP1Ch3C4G5A6Lo7br Longitarsus\_brunneus NCBI  
XXXXXXXXXXXXXXXXX-XX- CP1Ch3C4G5A6Lo7dor Longitarsus\_dorsalis Chryso.idba.108\_MERGED\_MMG\_ANNOT\_FROM\_BARCODE  
-XX- CP1Ch3C4G5A6Lo7suc Longitarsus\_succineus NCBI  
XXXXXXXXXXXXXXXXX-XX- CP1Ch3C4G5A6Lo7atr Longitarsus\_atricillus Chryso.idba.40\_MERGED\_MMG\_ANNOT\_FROM\_BARCODE  
-XX-XX- CP1Ch3C4G5A6Lo7bed Longitarsus\_bedei NCBI  
XXXXXXXXXXXXXXXXX- CP1Ch3C4G5A6Lo7ibe Longitarsus\_ibericus Chryso.idba.67\_MERGED\_MMG\_ANNOT\_FROM\_BARCODE  
-XX- CP1Ch3C4G5A6Lo7anc Longitarsus\_anchusae NCBI  
XXXXXXXXXXXXXXXXX- CP1Ch3C4G5A6Lo7nig Longitarsus\_nigrocollis Chryso.idba.14\_MMG\_ANNOT\_FROM\_BARCODE  
XXXXXXXXXXXXXXXXX- CP1Ch3C4Xut7 Xuthea\_yunnanensis ChrysoT.idba.0\_MMG\_ANNOT\_FROM\_BARCODE  
-XXXX- CP1Ch3 Chrysomeloidea\_sp2 BIUK.idba.77\_MMG\_ANNOT\_FROM\_TREE  
-X-XX- CP1Ch3C4G5A6Cre7aureo Crepidodera\_aureola NCBI  
XXXXXXXXXXXXXXXXX-XXX- CP1Ch3C4G5A6Cre7plu Crepidodera\_pluta\_amei.idba.98\_MERGED\_MMG\_ANNOT\_FROM\_BARCODE  
XXXXXX- CP1Ch3C4G5A6Chal7ful Chalcoides\_fulvicornis Chryso.idba.165\_MMG\_ANNOT\_FROM\_BARCODE  
-XX- CP1Ch3C4G5A6Cre7aur Crepidodera\_aurata NCBI  
XXXXXX- CP1Ch3C4G5A6Cre7 Crepidodera\_sp Chryso.idba.174\_MMG\_ANNOT\_FROM\_BARCODE  
-X-XXXX- CP1Ch3C4G5A6Chal7ful Chalcoides\_fulvicornis Chryso.idba.153\_MERGED\_MMG\_ANNOT\_FROM\_BARCODE  
-XX- CP1Ch3C4G5A6Cre7aureo Crepidodera\_aurea NCBI  
XXXXXX- CP1Ch3C4G5A6Chal7aur Chalcoides\_aurea BIUK.idba.63\_MMG\_ANNOT\_FROM\_BARCODE  
-XX- CP1Ch3C4G5A6Chae7con Chaetocnema\_concinna NCBI  
-XX- CP1Ch3C4G5A6Chae7pic Chaetocnema\_picipes NCBI  
-X-XXX- CP1Ch3C4G5A6Chae7chl Chaetocnema\_chlorophana NCBI  
XXXXXXXXXXXXXXXXX-XX- CP1Ch3C4G5A6Chae7pel Chaetocnema\_pelagica Chryso.idba.21\_MERGED\_MMG\_ANNOT\_FROM\_BARCODE  
-X-XX- CP1Ch3C4G5A6Chae7ruf Chaetocnema\_rufefemorata NCBI  
XXXXXXXXXXXXXXXXX-XX- CP1Ch3C4G5A6Chae7hor Chaetocnema\_hortensis Chryso.idba.125\_MERGED\_MMG\_ANNOT\_FROM\_BARCODE  
XXXXXXXXXXXXXXXXX-XX- CP1Ch3C4G5A6Chae7obe Chaetocnema\_obesa Chryso.idba.93\_MERGED\_MMG\_ANNOT\_FROM\_BARCODE  
XXXXXXXXXXXXXXXXX-XX- CP1Ch3C4G5A6Chae7ari Chaetocnema\_arida Chryso.idba.82\_MERGED\_MMG\_ANNOT\_FROM\_BARCODE  
XXXXXXXXXXXXXXXXX-XX- CP1Ch3C4G5A6Chae7pag Chaetocnema\_paganetti Chryso.idba.78\_MERGED\_MMG\_ANNOT\_FROM\_BARCODE  
XXXXXXXXXXXXXXXXX-XX- CP1Ch3C4G5A6Chae7dep Chaetocnema\_depressa Chryso.idba.43\_MERGED\_MMG\_ANNOT\_FROM\_BARCODE  
-XX- CP1Ch3C4G5A6Chae7bas Chaetocnema\_basalis NCBI  
XXXXXXXXXXXXXXXXX-XX- CP1Ch3C4G5A6Chae7sch Chaetocnema\_scheffleri Chryso.idba.69\_MERGED\_MMG\_ANNOT\_FROM\_BARCODE  
-XXXXXXXX- CP1Ch3 Chrysomeloidea\_sp2\_amei.idba.117\_MMG\_ANNOT\_FROM\_TREE  
XXXXXXXXXXXXXXXXX-XX- CP1Ch3C4G5A6Chae7tib Chaetocnema\_tibialis Chryso.idba.75\_MERGED\_MMG\_ANNOT\_FROM\_BARCODE  
-X- CP1Ch3C4G5A6or7cop Orthaltica\_copalina NCBI  
-XX-XXX- CP1Ch3C4G5A6Lyt7sal Lythraia\_salicariae NCBI  
-XX- CP1Ch3C4G5A6Ep7pub Eptrix\_pubescens NCBI  
XXXXXXXXXXXXXXXXX-XX- CP1Ch3C4G5A6Ep7abe Eptrix\_abelitei CS.idba.39\_MERGED\_MMG\_ANNOT\_FROM\_BARCODE  
-X-XXX- CP1Ch3C4G5A6Psy7bre Psylliodes\_bretlinghami NCBI  
-X- CP1Ch3C4G5A6D17con Disonycha\_conjuncta NCBI  
XXXXXXXXXXXXXXXXX- CP1Ch3C4G5A6Psy7hey Psylliodes\_heydeni Chryso.idba.7\_MMG\_ANNOT\_FROM\_BARCODE  
-X- CP1Ch3C4G5A6Psy7gib Psylliodes\_gibbosus NCBI  
XXXXXXXXXXXXXXXXX- CP1Ch3C4G5A6Psy7gou Psylliodes\_gougeti Chryso.idba.128\_MERGED\_MMG\_ANNOT\_FROM\_BARCODE  
-XX- CP1Ch3C4G5A6Psy7cuc Psylliodes\_cucullata NCBI  
-XX- CP1Ch3C4G5A6Psy7dul Psylliodes\_dulcamarae NCBI  
XXXXXXXXXXXXXXXXX- CP1Ch3C4G5A6Psy7sp ChrysoT.idba.8\_MMG\_ANNOT\_FROM\_BARCODE  
-XX- CP1Ch3C4G5A6Psy7a7f Psylliodes\_affinis NCBI  
XXXXXXXXXXXXXXXXX- CP1Ch3C4G5A6Galerucinae\_sp9 Chryso.idba.5\_MMG\_ANNOT\_FROM\_TREE



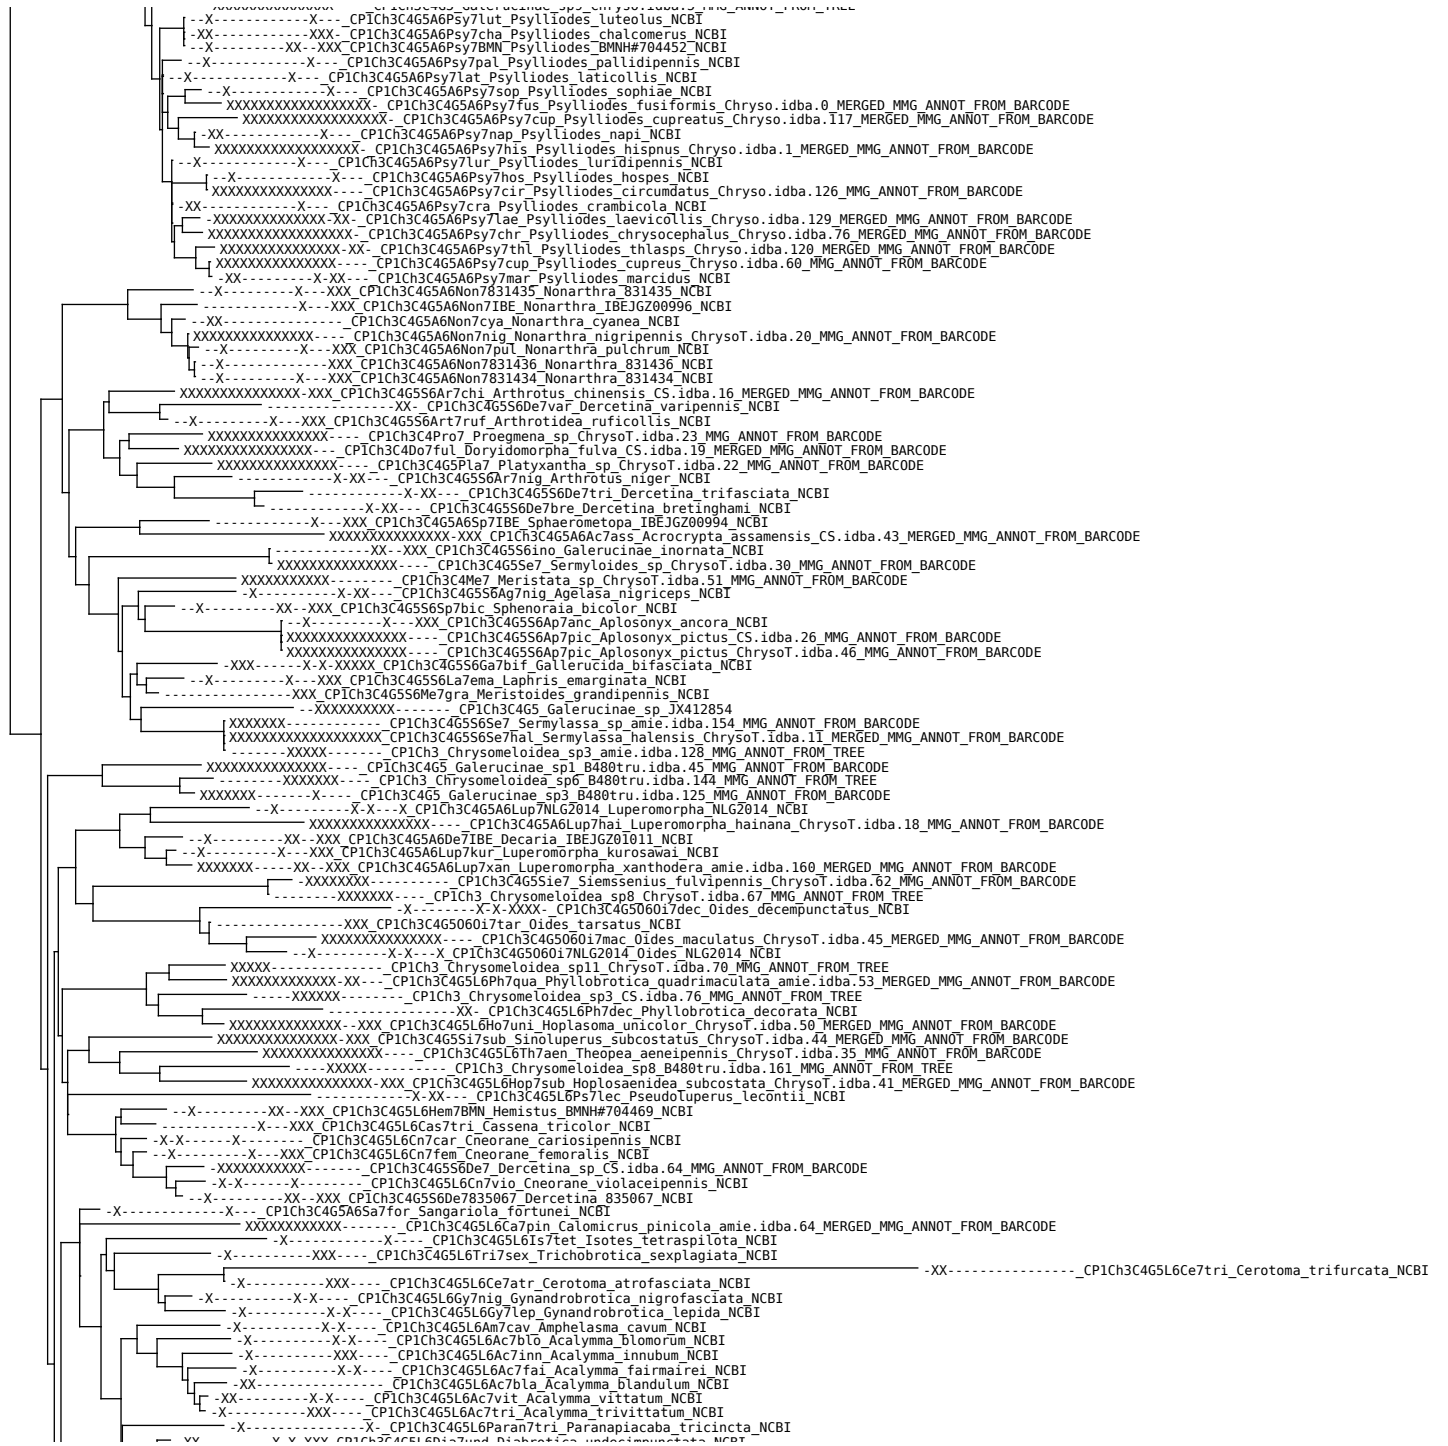

CP1Ch3C4G5L6D1a7num Diabrotica nummularis NCBI  
CP1Ch3C4G5L6D1a7spe Diabrotica speciosa NCBI  
CP1Ch3C4G5L6D1a7bal Diabrotica balteata NCBI  
CP1Ch3C4G5L6D1a7ade Diabrotica adelpha NCBI  
CP1Ch3C4G5L6D1a7tib Diabrotica tibialis NCBI  
CP1Ch3C4G5L6D1a7JG336 Diabrotica JG336 NCBI  
CP1Ch3C4G5835469 Galerucinae\_835469 NCBI  
CP1Ch3C4G5L6D1a7dis Diabrotica dissimilis NCBI  
CP1Ch3C4G5L6D1a7sex Diabrotica sexmaculata NCBI  
CP1Ch3C4G5L6Par7cur Paratariarius curtisii NCBI  
CP1Ch3C4G5L6D1a7cri Diabrotica cristata NCBI  
CP1Ch3C4G5L6D1a7lem Diabrotica lemniscata NCBI  
CP1Ch3C4G5L6D1a7por Diabrotica porracea NCBI  
CP1Ch3C4G5L6D1a7vir Diabrotica virgifera KF65807\_MERGED  
CP1Ch3C4G5L6D1a7lon Diabrotica longicornis NCBI  
CP1Ch3C4G5L6D1a7bar Diabrotica barberi NC\_022935\_MERGED  
CP1Ch3C4G5L6D1a7viri Diabrotica viridula NCBI  
CP1Ch3C4G5L6D1a7scu Diabrotica scutellata NCBI  
CP1Ch3C4G5L6D1a7ame Diabrotica amecameca NCBI  
CP1Ch3C4G5835065 Galerucinae\_835065 NCBI  
CP1Ch3C4G5L6Mi7sor Mimastra soreili ChrysoT.idba.49\_MMG\_ANNOT\_FROM\_BARCODE  
CP1Ch3C4G5L6Mi7lim Mimastra limbata NCBI  
CP1Ch3C4G5L6Cas7ter Cassena terminalis CS.idba.29\_MMG\_ANNOT\_FROM\_BARCODE  
CP1Ch3C4G5L6Ex7lus Exosoma lusitanicum Chryso.idba.116\_MERGED\_MMG\_ANNOT\_FROM\_BARCODE  
CP1Ch3 Chrysomeoidea\_sp Chryso.idba.140\_MMG\_ANNOT\_FROM\_TREE  
CP1Ch3C4G5L6Lu7xan Luperus xanthopoda NCBI  
CP1Ch3 Chrysomeoidea\_sp Chryso.idba.171\_MMG\_ANNOT\_FROM\_BARCODE  
CP1Ch3C4G5L6Lu7su Luperus sulphuripes NCBI  
CP1Ch3C4G5L6Lu7ton Luperus longicornis NCBI  
CP1Ch3C4G5L6F7arm Leutiauxia armata JX412797  
CP1Ch3C4G5Par7fla Paragotocera favipes ChrysoT.idba.24\_MERGED\_MMG\_ANNOT\_FROM\_BARCODE  
CP1Ch3C4G5L6Par7bip Paridea bipagiata ChrysoT.idba.10\_MMG\_ANNOT\_FROM\_BARCODE  
CP1Ch3C4G5L6Ag7mir Agetocera mirabilis CS.idba.48\_MERGED\_MMG\_ANNOT\_FROM\_BARCODE  
CP1Ch3C4G5L6Au7pal Aulacophora palmerstoni NCBI  
CP1Ch3C4G5L6S7JG210 Sonchias JG210 NCBI  
CP1Ch3C4G5L6Di7MB2007 Diacantha MB2007 NCBI  
CP1Ch3C4G5L6Au7lew Aulacophora lewisii NCBI  
CP1Ch3C4G5L6Di7MB2007\_1 Diacantha MB2007 NCBI  
CP1Ch3C4G5L6Au7ind Aulacophora indica NCBI  
CP1Ch3C4G5L6Le7und Leptaulaca undecimpunctata NCBI  
CP1Ch3C4G570477 Galerucinae\_70477 NCBI  
CP1Ch3C4G5L6Ia7thex Jacobyella hexaspilota NCBI  
CP1Ch3C4G5L6Ch7JG201 Chosnia JG201 NCBI  
CP1Ch3C4G5L6Di7col Diacantha collaris NCBI  
CP1Ch3C4G5L6Di7uni Diacantha unifasciata NCBI  
CP1Ch3C4G5S6Mo7831711 Morphosphaera 831711 NCBI  
CP1Ch3C4G5S6Age7coe Agelastica coerulea NCBI  
CP1Ch3C4G5S6Age7aln Agelastica alni CS.idba.57\_MERGED\_MMG\_ANNOT\_FROM\_BARCODE  
CP1Ch3C4G5835056 Galerucinae\_835056 NCBI  
CP1Ch3C4G5Seche7Sehegklingia sp ChrysoT.idba.31\_MMG\_ANNOT\_FROM\_BARCODE  
CP1Ch3C4G5A6Hes7obes Hespera obesula ChrysoT.idba.4\_MMG\_ANNOT\_FROM\_BARCODE  
CP1Ch3 Chrysomeoidea\_sp ChrysoT.idba.63\_MMG\_ANNOT\_FROM\_TREE  
CP1Ch3C4G5A6Hes7lom Hespera lomasa NCBI  
CP1Ch3C4G5L6St7f7la Stenoluperus flaviventris ChrysoT.idba.27\_MMG\_ANNOT\_FROM\_BARCODE  
CP1Ch3C4G5L6St7831453 Stenoluperus\_831453 NCBI  
CP1Ch3C4G5L6St7nnp Stenoluperus nipponensis ChrysoT.idba.29\_MERGED\_MMG\_ANNOT\_FROM\_BARCODE  
CP1Ch3C4G5A6Lao7831414 Laotzeus 831414 NCBI  
CP1Ch3C4G5A6Lao7 Laotzeus sp ChrysoT.idba.21\_MMG\_ANNOT\_FROM\_BARCODE  
CP1Ch3C4G5L6Li7Liroetiella sp B480tru.idba.24\_MMG\_ANNOT\_FROM\_BARCODE  
CP1Ch3C4G5Ma7str Macrима straminea ChrysoT.idba.42\_MMG\_ANNOT\_FROM\_BARCODE  
CP1Ch3 Chrysomeoidea\_sp5 CS.idba.83\_MMG\_ANNOT\_FROM\_TREE  
CP1Ch3 Chrysomeoidea\_sp10 ChrysoT.idba.191\_MMG\_ANNOT\_FROM\_TREE  
CP1Ch3C4G5L6Mo7hie Monolepta hieroglyphica NCBI  
CP1Ch3C4G5L6Mo7aus Monolepta australis NCBI  
CP1Ch3 Chrysomeoidea\_sp10 B480tru.idba.51\_MMG\_ANNOT\_FROM\_TREE  
CP1Ch3 Chrysomeoidea\_sp1 Soil.idba.117\_MMG\_ANNOT\_FROM\_TREE  
CP1Ch3C4G5 Galerucinae\_sp3 Chryso.idba.148\_MMG\_ANNOT\_FROM\_TREE  
CP1Ch3C4G5L6Mo7nigr Monolepta nigripes NCBI  
CP1Ch3C4G5L6Lep7rus Leptomona russica NCBI  
CP1Ch3C4G5L6Lep7ery Leptomona erythrocephala Chryso.idba.46\_MERGED\_MMG\_ANNOT\_FROM\_BARCODE  
CP1Ch3C4G5 Galerucinae\_sp5 B480tru.idba.73\_MMG\_ANNOT\_FROM\_BARCODE  
CP1Ch3C4G5L6Mar7art Monolepta artemarginata ChrysoT.idba.43\_MMG\_ANNOT\_FROM\_BARCODE  
CP1Ch3C4G5L6Ca7srit Calomicrus suturalis ChrysoT.idba.22\_MERGED\_MMG\_ANNOT\_FROM\_BARCODE  
CP1Ch3C4G5L6Ca7cal Calomicrus sp ChrysoT.idba.176\_MMG\_ANNOT\_FROM\_BARCODE  
CP1Ch3C4G5L6Ca7cir Calomicrus circumfusus ChrysoT.idba.139\_MERGED\_MMG\_ANNOT\_FROM\_BARCODE  
CP1Ch3C4G5 Galerucinae\_sp7 B480tru.idba.36\_MMG\_ANNOT\_FROM\_BARCODE  
CP1Ch3 Chrysomeoidea\_sp9 B480tru.idba.48\_MMG\_ANNOT\_FROM\_TREE  
CP1Ch3C4G5Ma7835074 Macrима 835074 NCBI  
CP1Ch3C4G5L6At7men Atrachya menetriei NCBI  
CP1Ch3C4G5L6At7kak Afrocrania kakamegaensis NCBI  
CP1Ch3C4G5G6Op7sex Ophraella sexvittata NCBI  
CP1Ch3C4G5G6Op7BMN Ophraella BMNH#704472 NCBI  
CP1Ch3C4G5G6Op7com Ophraella communis NCBI  
CP1Ch3C4G5M6Ch7JG109 Chthonis JG109 NCBI  
CP1Ch3C4G5M6Ex7obs Exora obsleta NCBI  
CP1Ch3C4G5M6He7BMN Hecataeus BMNH#704468 NCBI  
CP1Ch3C4G5M6He7 Hecataeus sp ChrysoT.idba.37\_MMG\_ANNOT\_FROM\_BARCODE  
CP1Ch3 Chrysomeoidea\_sp2 CS.idba.72\_MMG\_ANNOT\_FROM\_TREE  
CP1Ch3C4G5M6Cha7ell Chapuisia ellenbergeri JX412757  
CP1Ch3C4G5G6An7pot Anadimonia potanini ChrysoT.idba.25\_MMG\_ANNOT\_FROM\_BARCODE  
CP1Ch3C4G5G6Ca7JG139 Caraguata JG139 NCBI  
CP1Ch3C4G5G6Di7mac DiTcemella maculicollis NCBI  
CP1Ch3C4G5G6Py7vigo Periclitena vigorsii ChrysoT.idba.66\_MERGED\_MMG\_ANNOT\_FROM\_BARCODE  
CP1Ch3C4G5G6Pe7 Periclitena sp ChrysoT.idba.56\_MMG\_ANNOT\_FROM\_TREE  
CP1Ch3C4G5G6Py7mac Pyrrhalta maculicollis NCBI  
CP1Ch3C4G5G6Py7aen Pyrrhalta aenescens ChrysoT.idba.17\_MERGED\_MMG\_ANNOT\_FROM\_BARCODE  
CP1Ch3C4G5G6Xa7lut Xanthogaleruca luteola NCBI  
CP1Ch3 Chrysomeoidea\_sp5 ChrysoT.idba.61\_MMG\_ANNOT\_FROM\_TREE  
CP1Ch3C4G5835472 Galerucinae\_835472 NCBI

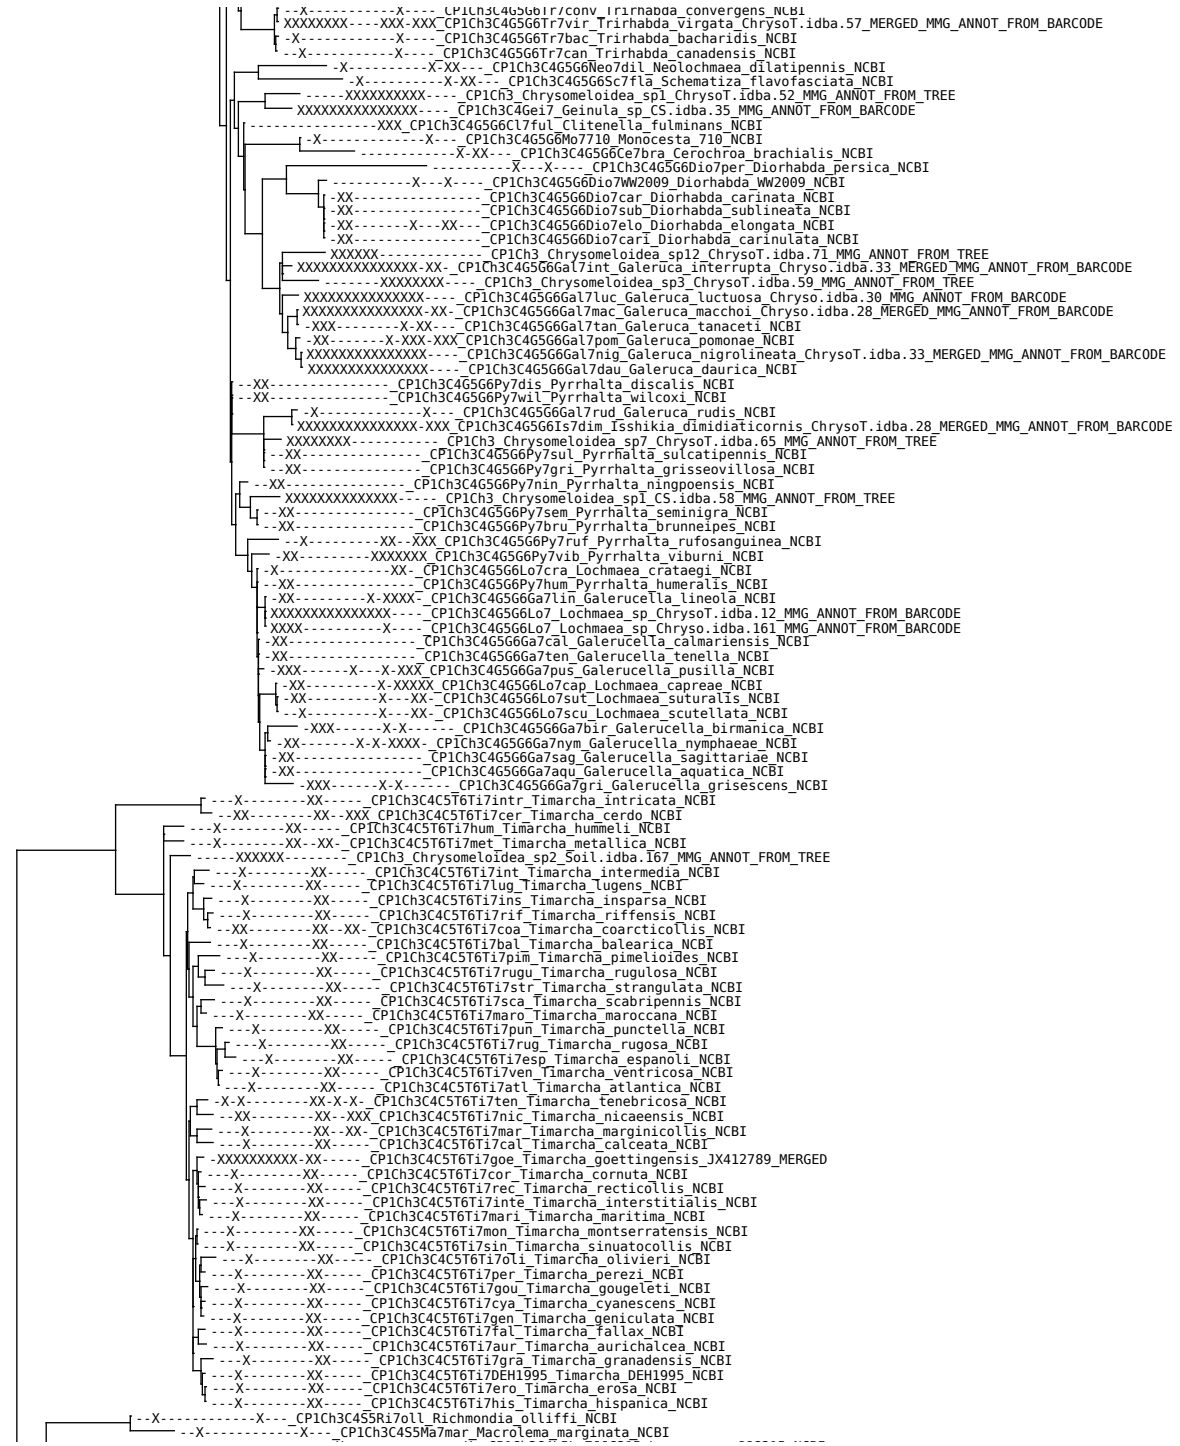

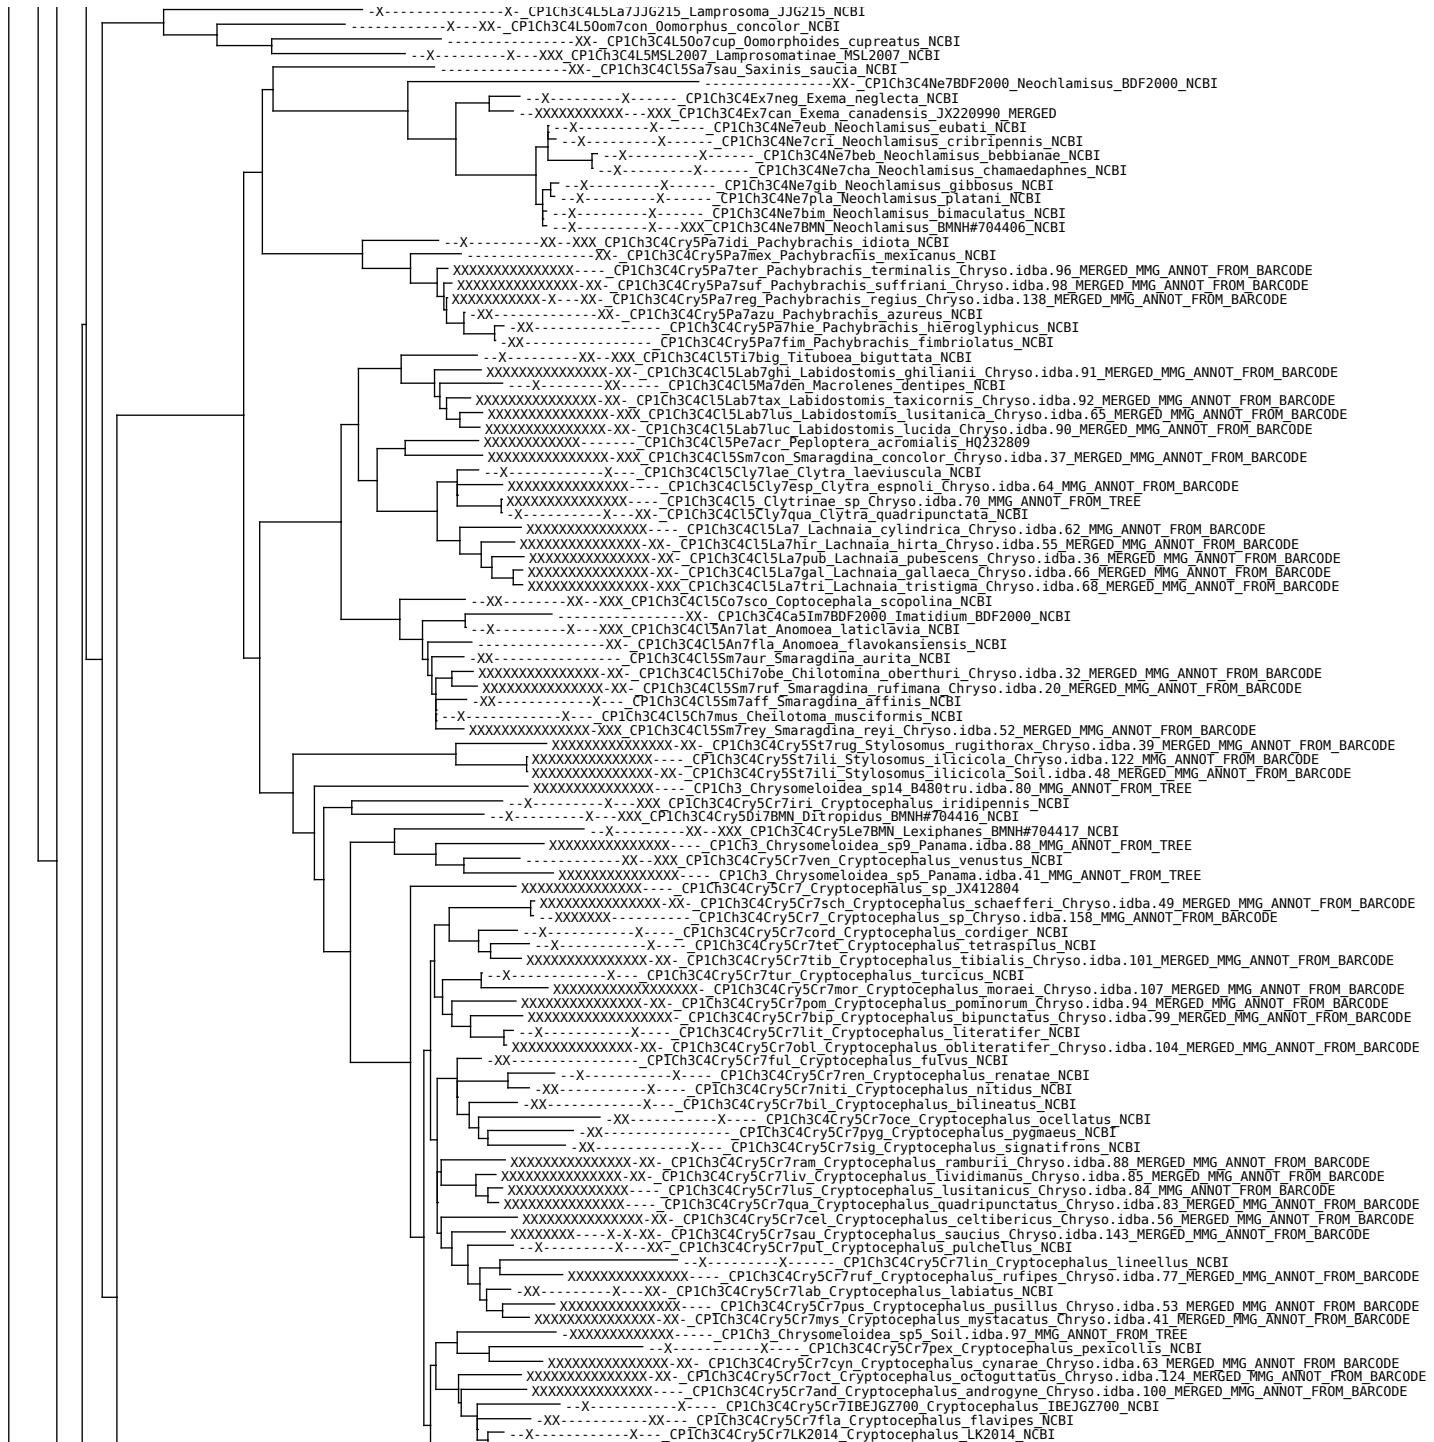

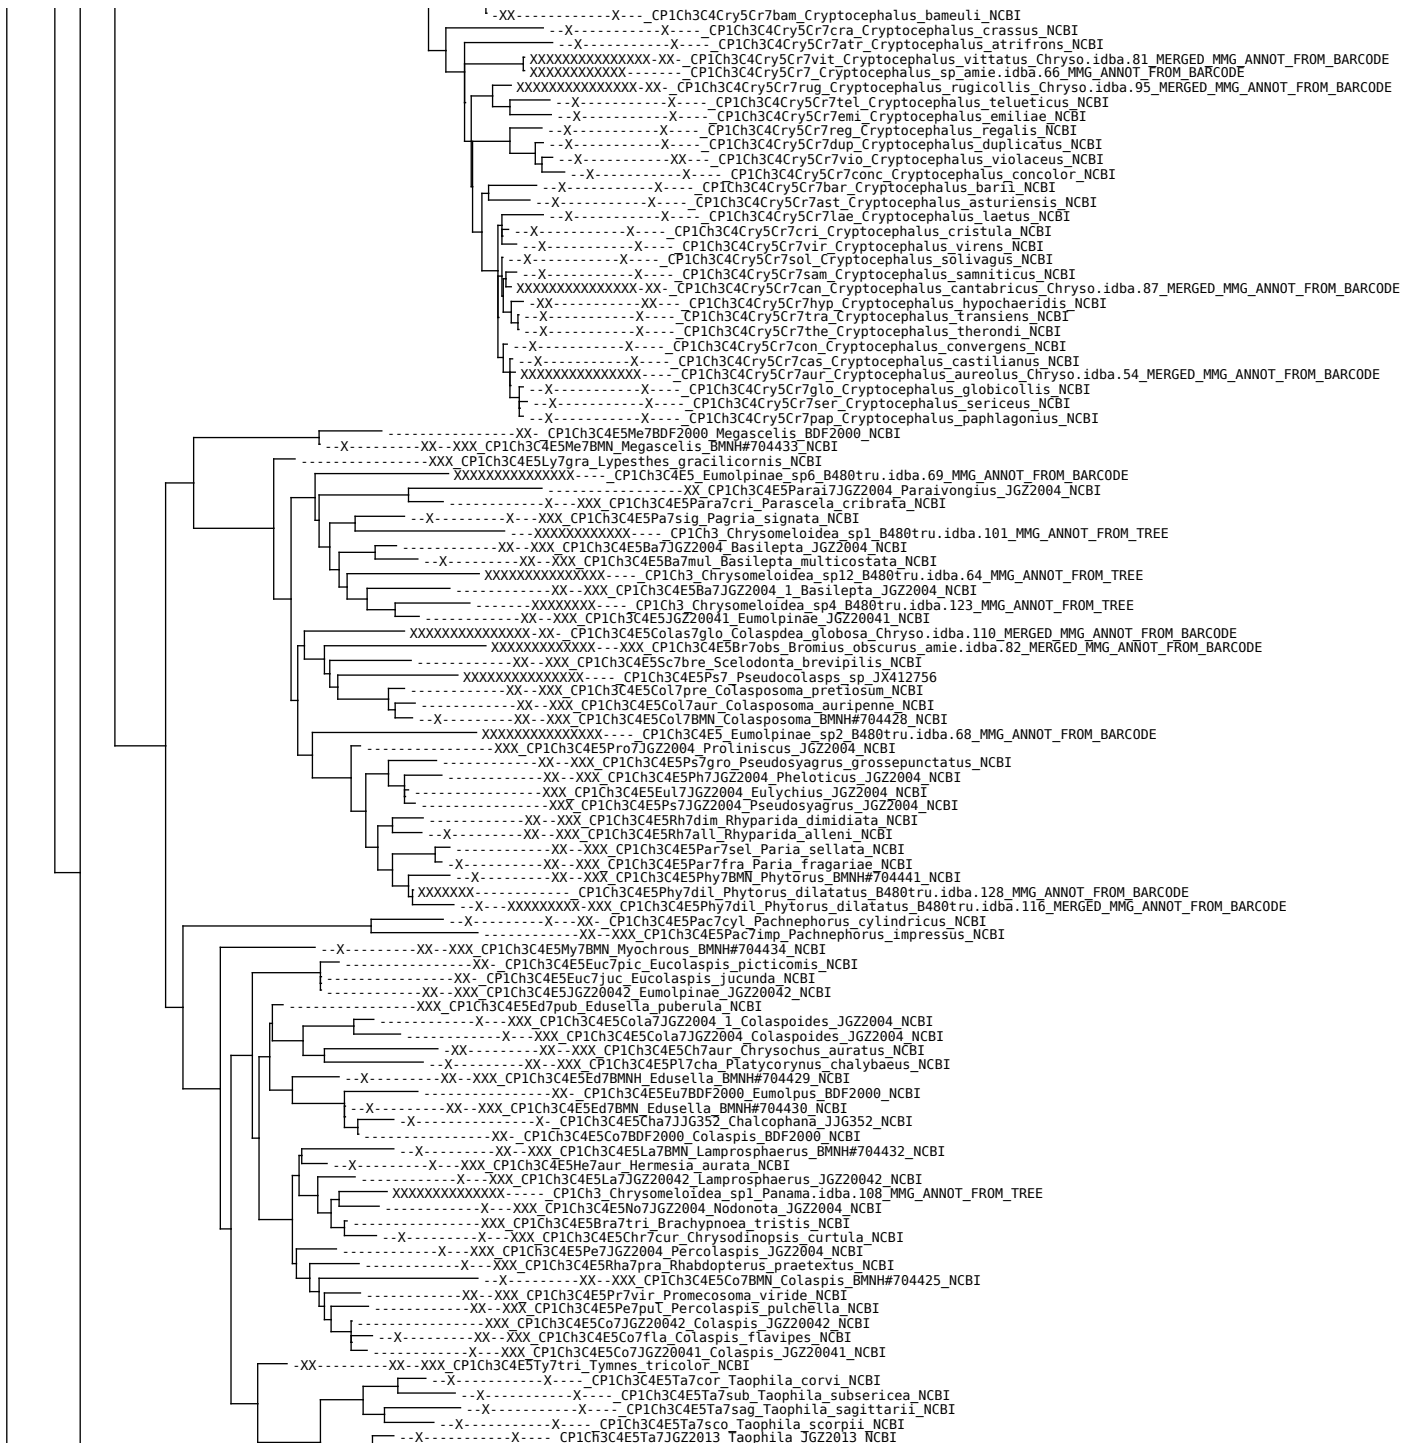

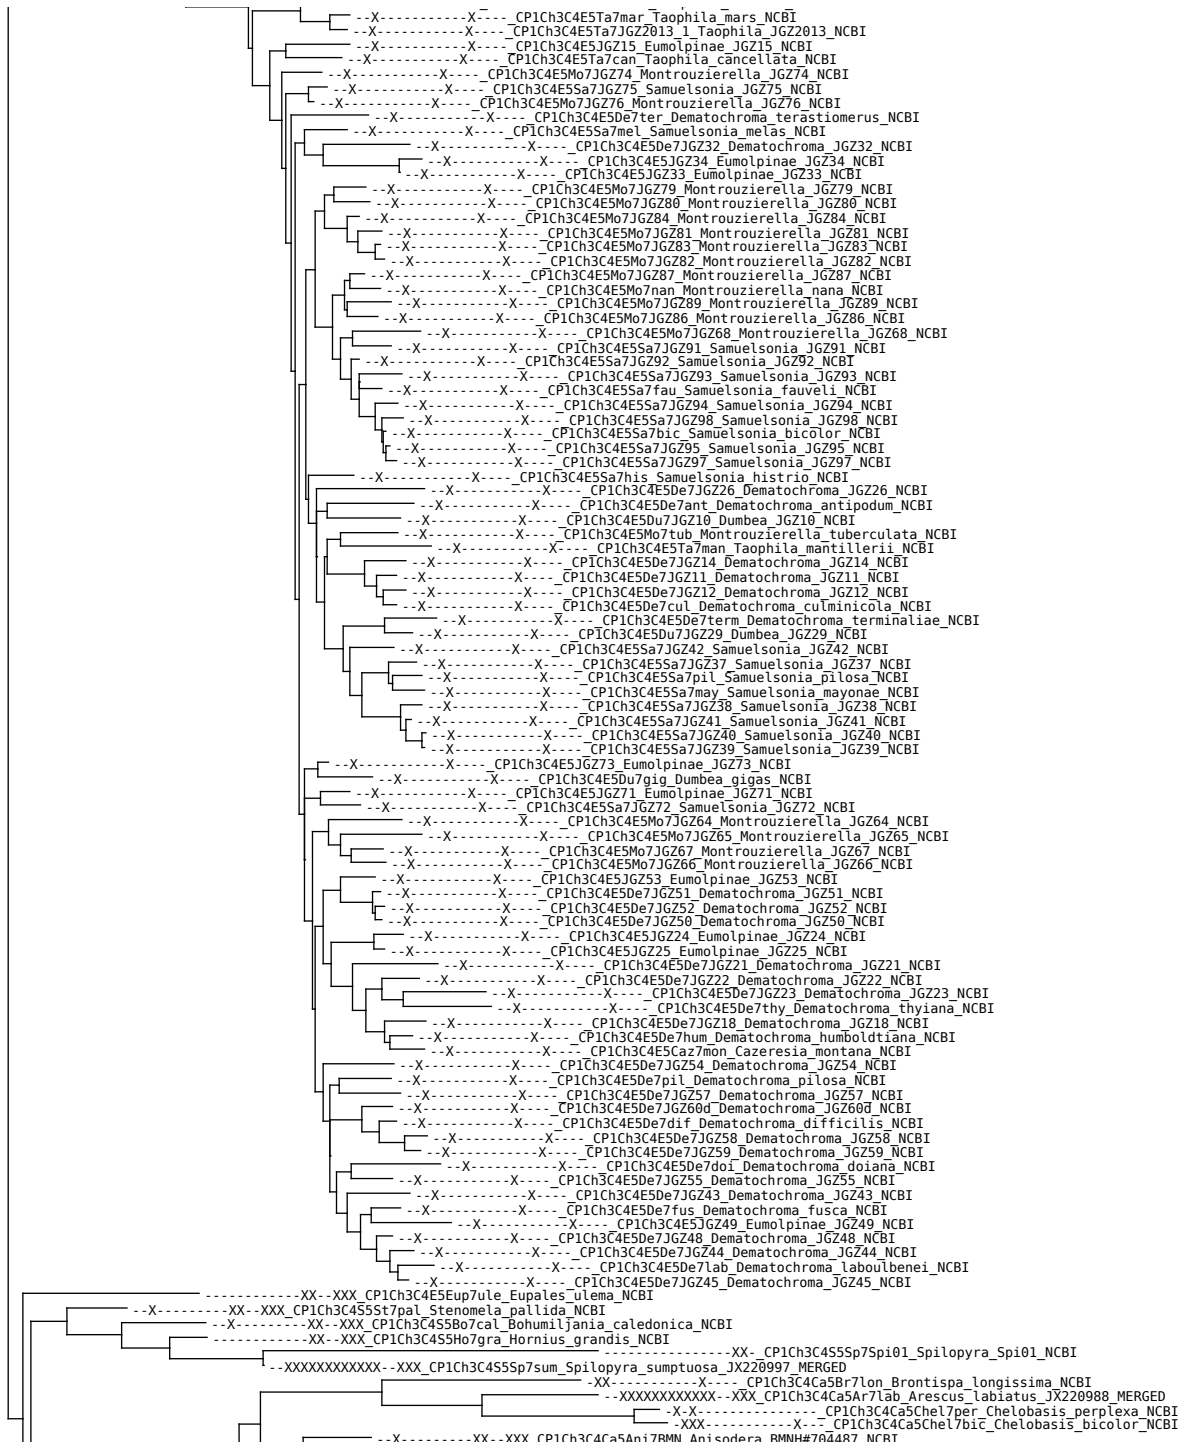

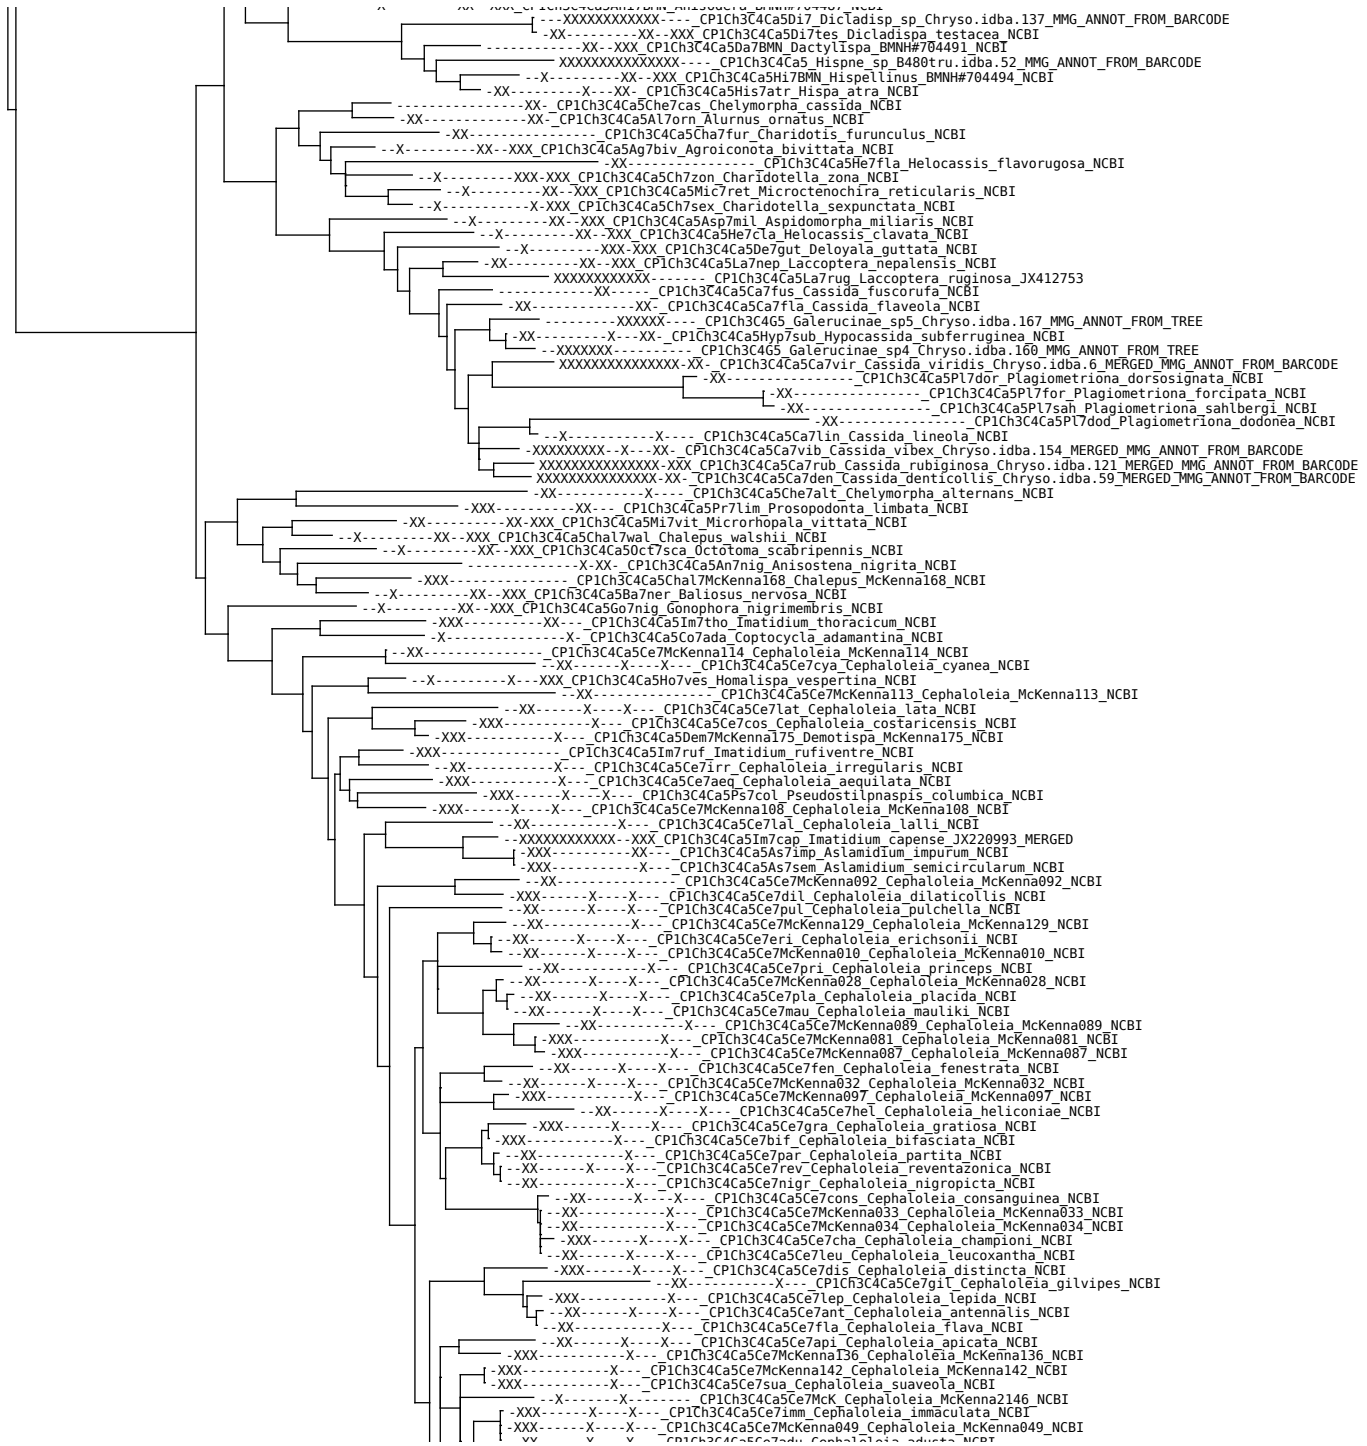

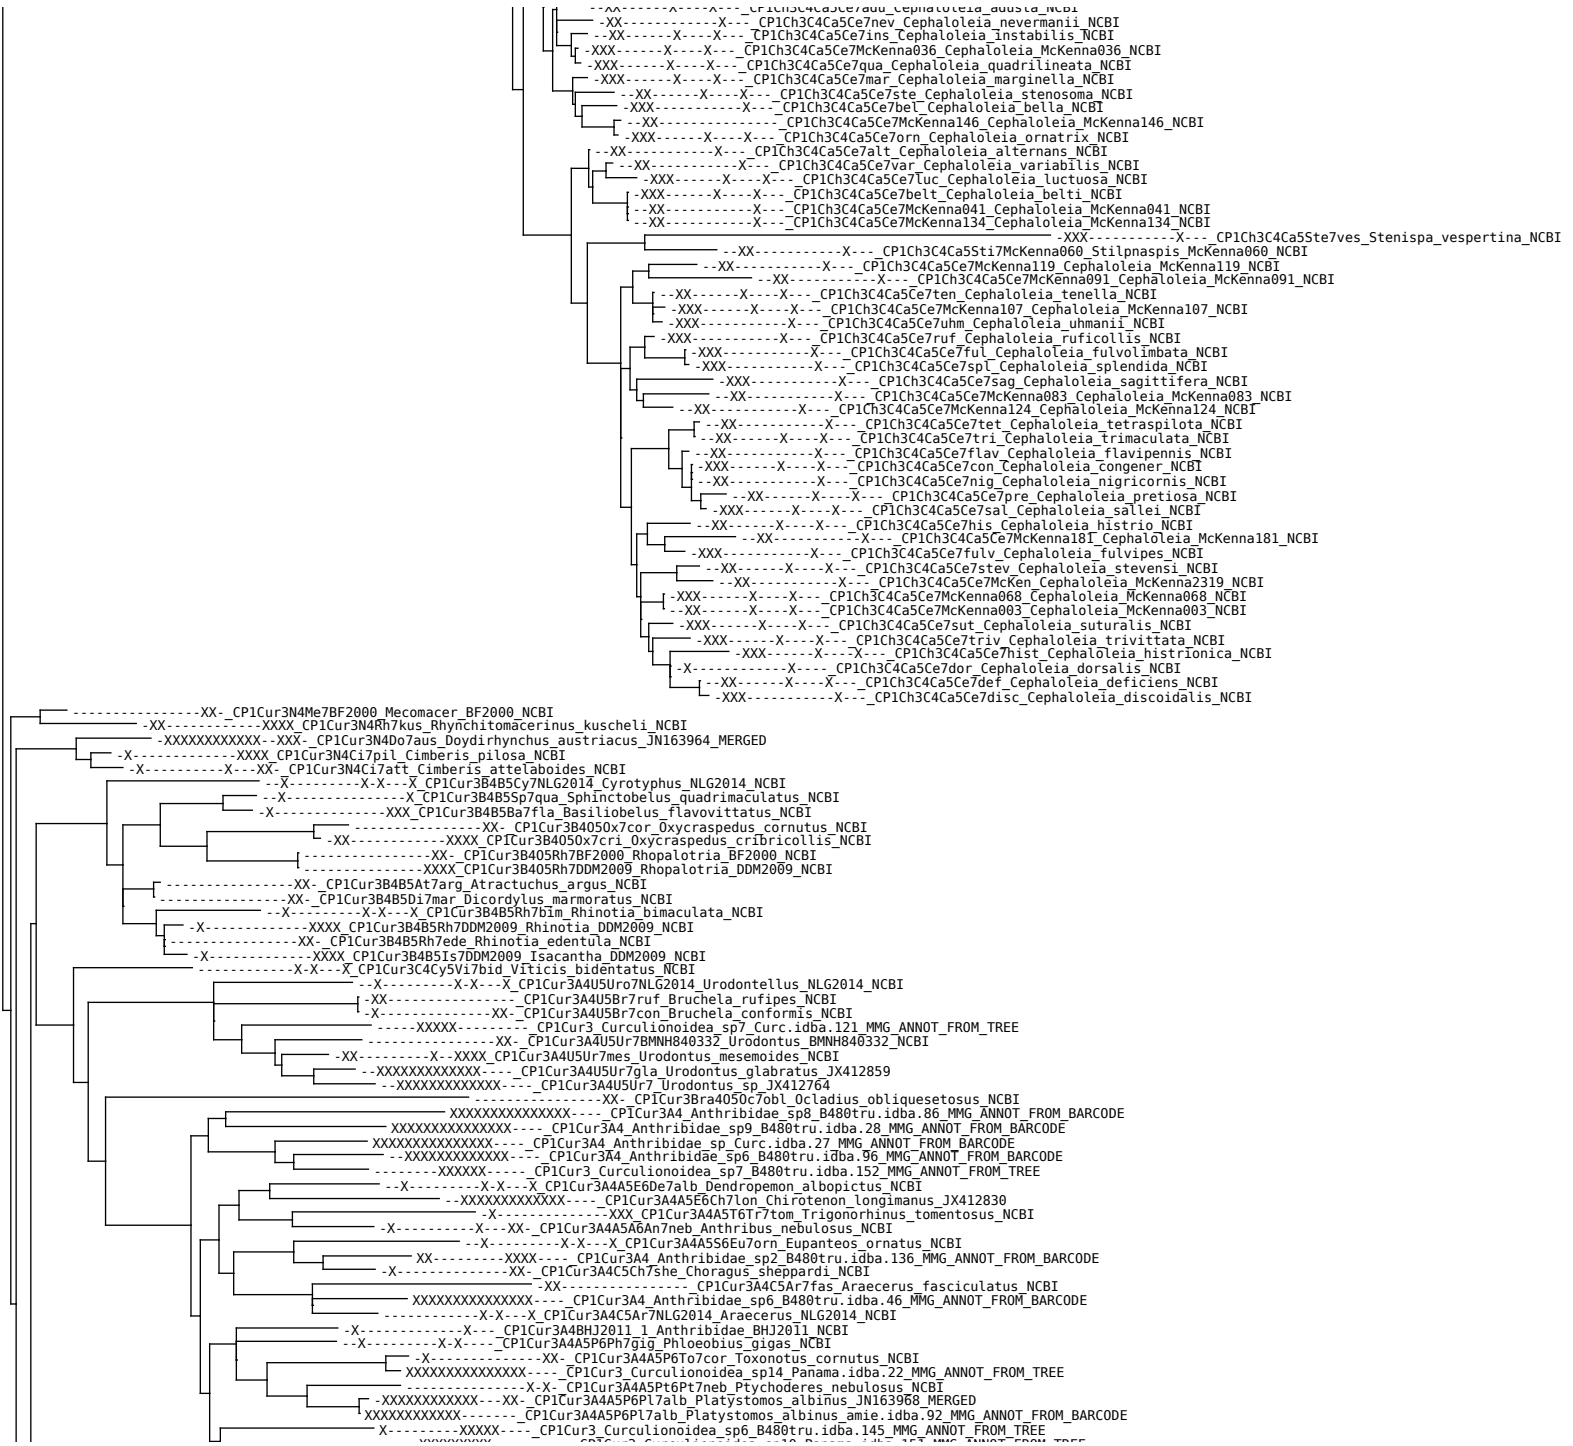



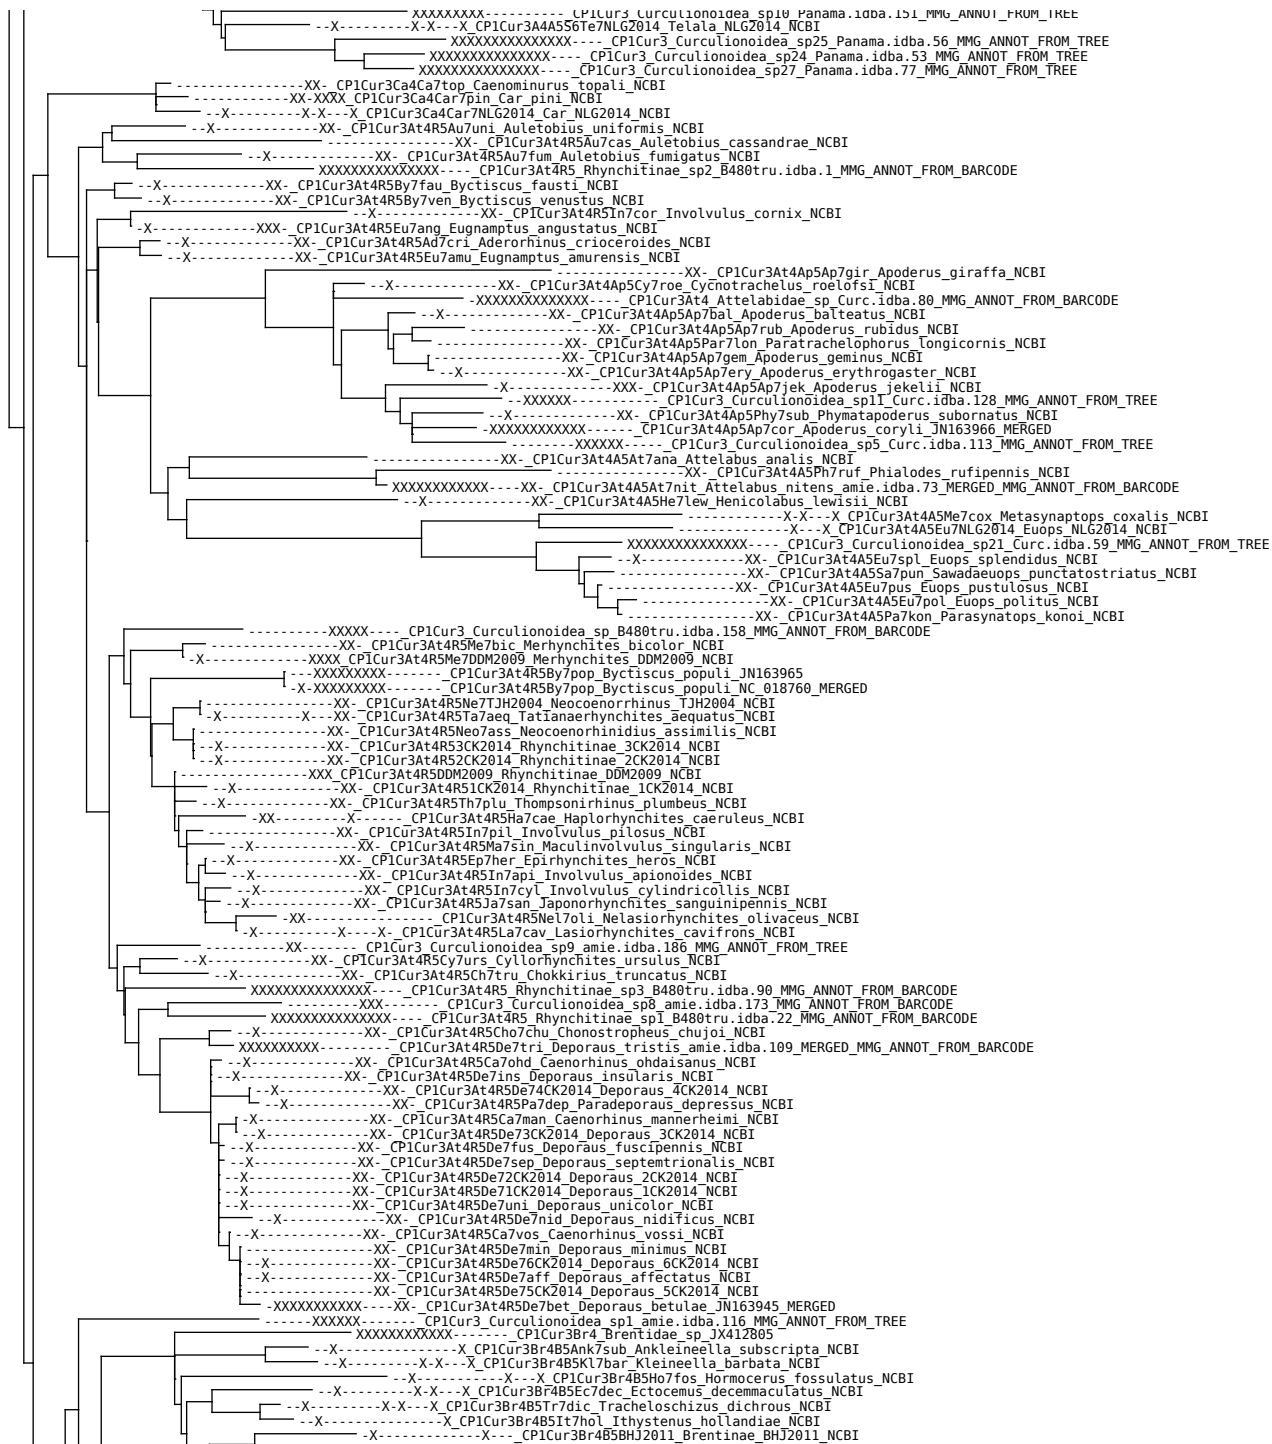

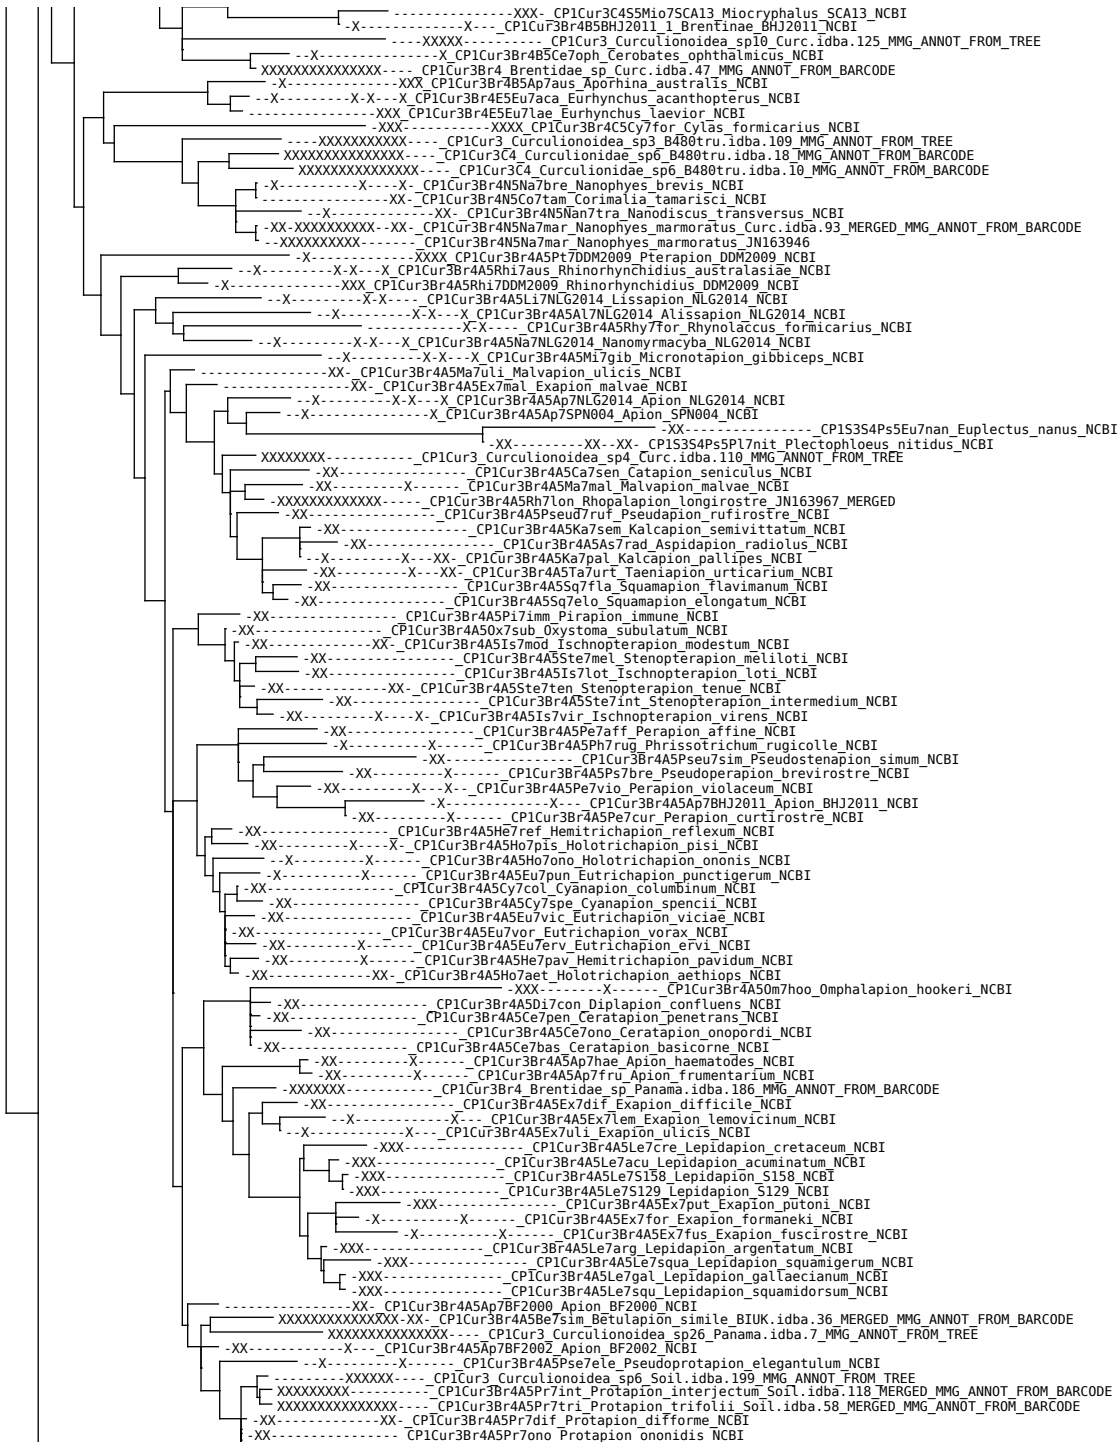

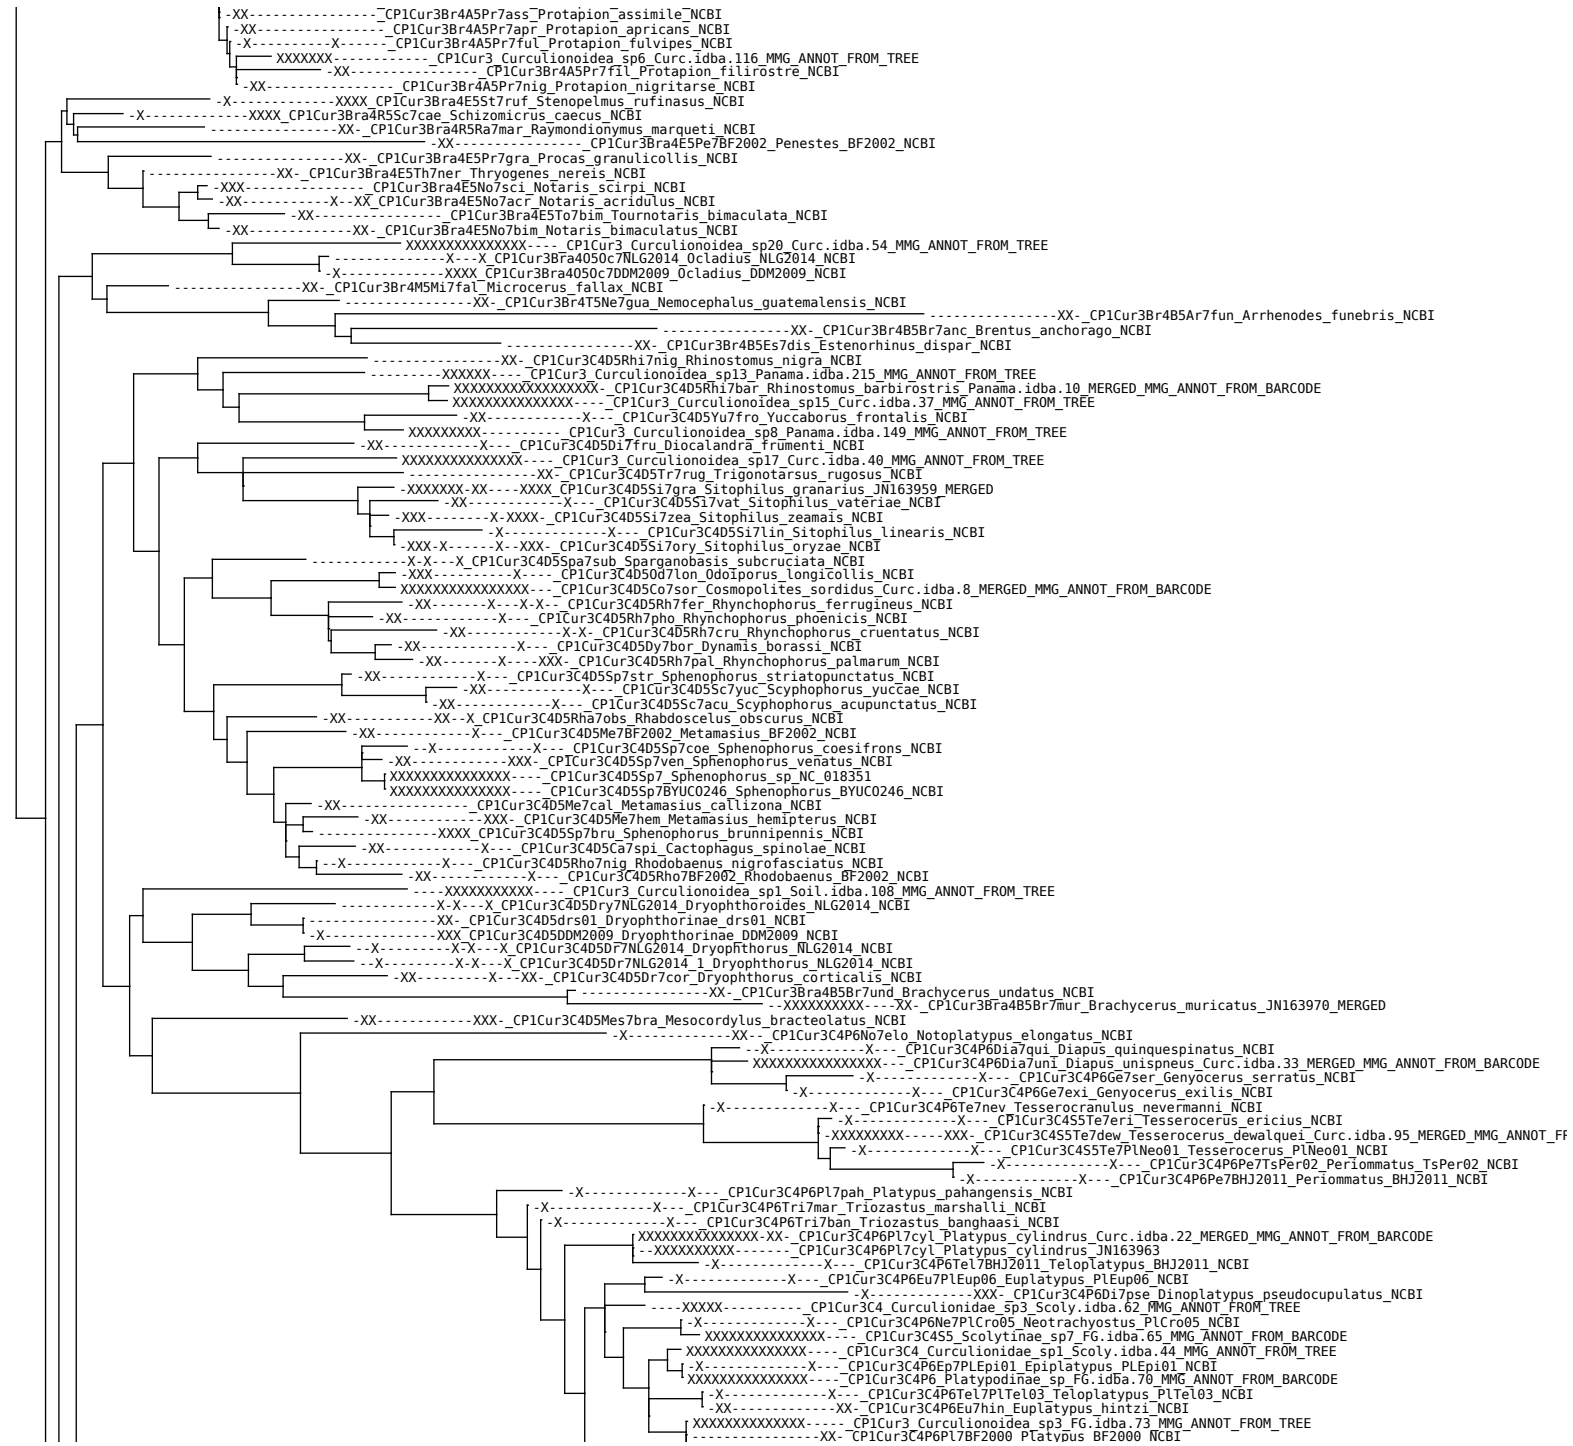

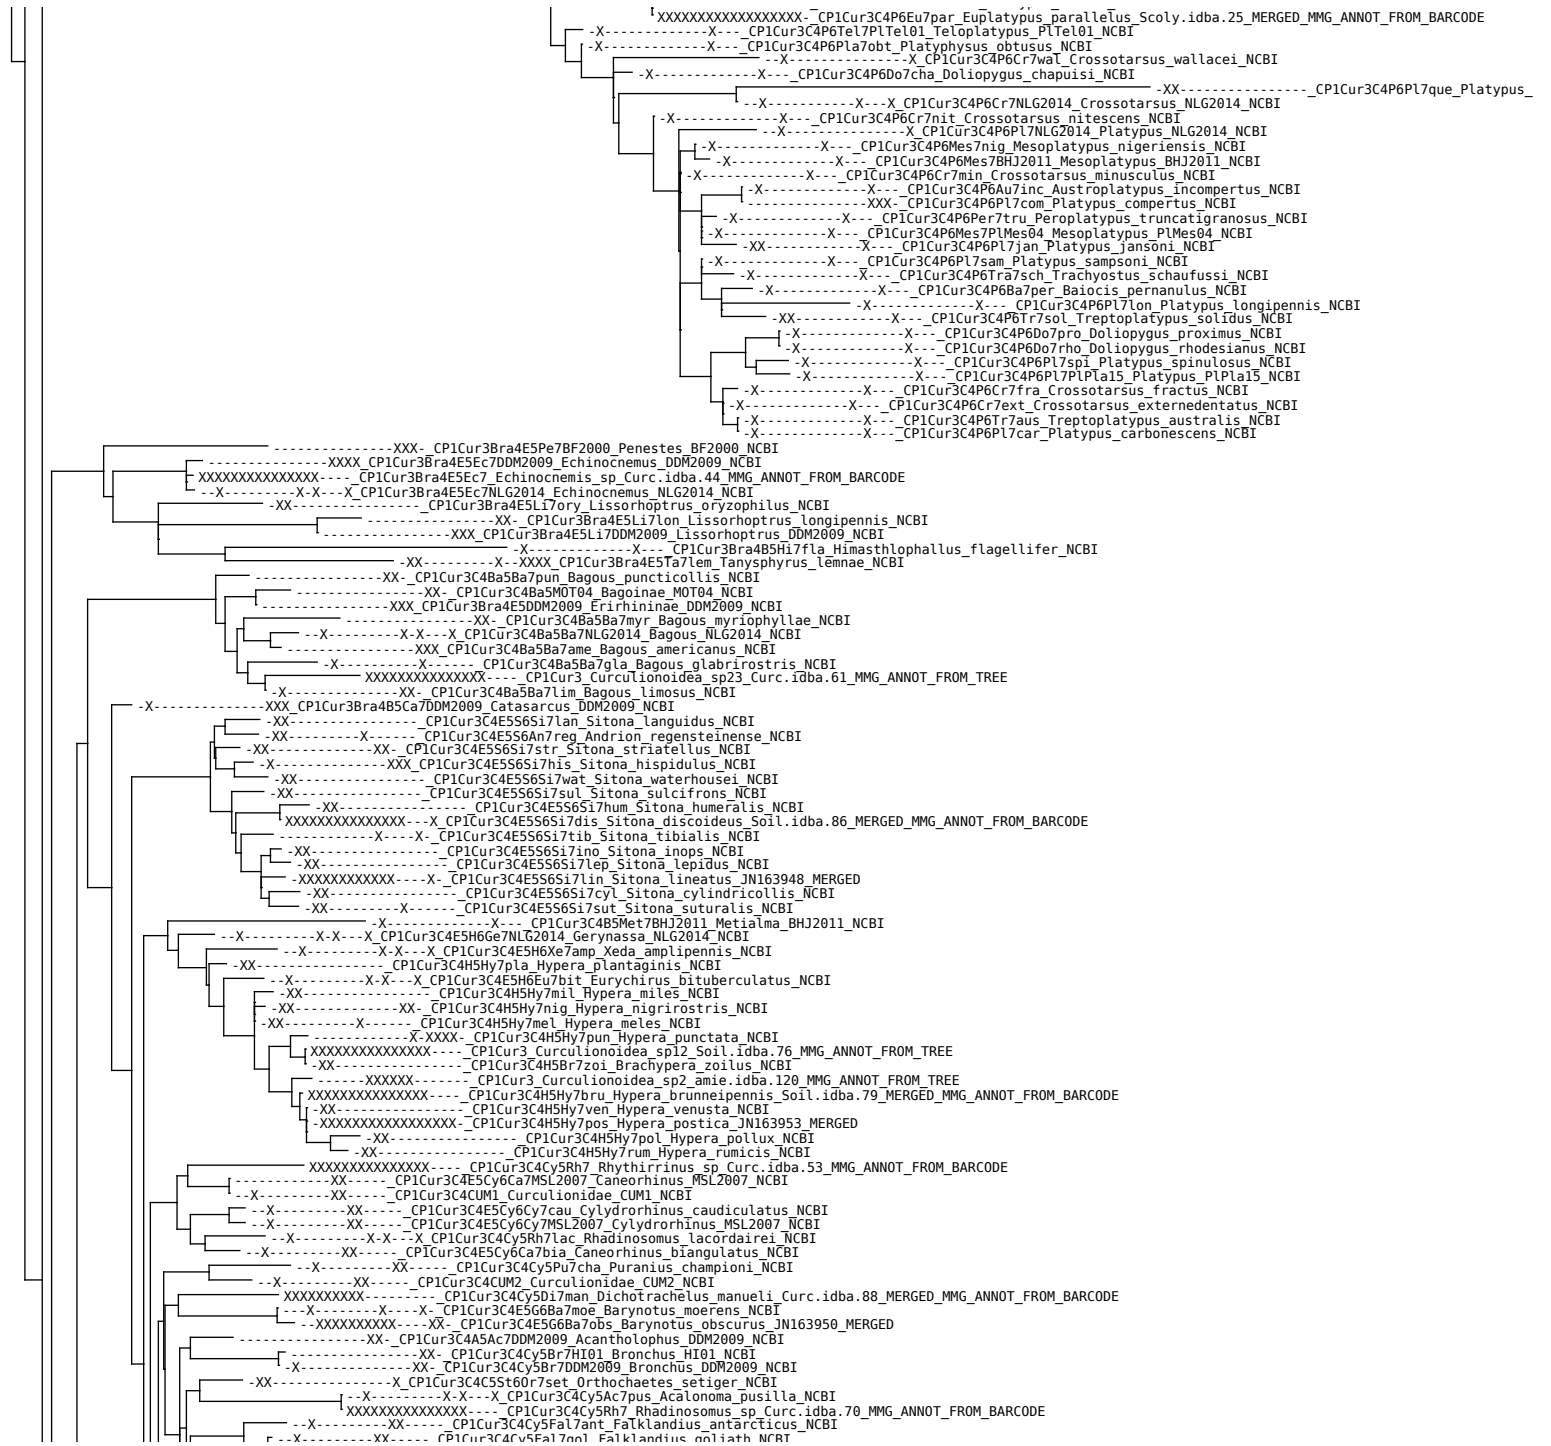

CP1Cur3C4Cy5Fa7tur Falklandius turbificatus NCBI  
CP1Cur3C4Cy5Fa7FAM1 Falklandius FAM1 NCBI  
CP1Cur3C4Cy5Ao7ruf Aoplocnemis rufipes NCBI  
CP1Cur3C4Cy5Ae7sup Aegorhinus superciliosus NCBI  
CP1Cur3C4Cy5Me7inc Nemestra incerta NCBI  
CP1Cur3C4Cy5Pe7var Pelororhinus variegatus NCBI  
CP1Cur3C4Cy5Pe7 Pelororhinus sp\_Curc.idba.81 MMG\_ANNOT\_FROM\_BARCODE  
CP1Cur3 Curculionoidea\_sp9\_Curc.idba.123 MMG\_ANNOT\_FROM\_TREE  
CP1Cur3C4Cy5Ha7alb Haversiella albolimbata NCBI  
CP1Cur3C4Cy5St7maj Steriphus major NCBI  
CP1Cur3C4Cy5St7NLG2014\_Steriphus\_NLG2014 NCBI  
CP1Cur3 Curculionoidea\_sp22\_Curc.idba.60 MMG\_ANNOT\_FROM\_TREE  
CP1Cur3C4E5Po6P7mol Polydrusus mollis NCBI  
CP1Cur3C4R5L6L7bon Listronotus bonariensis NCBI  
CP1Cur3C4C5P6Pr7BMNH668142 Prionomerus BMNH668142 NCBI  
CP1Cur3C4Le5Ae7not Aesiotes notabilis NCBI  
CP1Cur3C4G5D7vnt Oxyops vitiosa NCBI  
CP1Cur3C4G5G7G004 Gonipterus G004 NCBI  
CP1Cur3C4G5G7DDM2009 Gonipterus DDM2009 NCBI  
CP1Cur3C4Cy5An7fal Antarcticobius falklandicus NCBI  
CP1Cur3C4Cy5An7MSL2007\_Antarctobius\_MSL2007 NCBI  
CP1Cur3C4Cy5Ge7MSL2007\_Germainiellus\_MSL2007 NCBI  
CP1Cur3C4Cy5Ge7sal Germainiellus salebrosus NCBI  
CP1Cur3C4Cy5An7MSL2007\_1\_Antarctobius\_MSL2007 NCBI  
CP1Cur3C4Cy5An7vul Antarcticobius vulsus NCBI  
CP1Cur3C4Cy5Ta7sub Talaurinus subvittatus NCBI  
CP1Cur3C4E5Tr6Ca7bif Callirhopalus bifasciatus NCBI  
CP1Cur3 Curculionoidea\_sp9\_Curc.idba.124 MMG\_ANNOT\_FROM\_TREE  
CP1Cur3C4E5Tr6Ca7bif Callirhopalus bifasciatus NCBI  
CP1Cur3 Curculionoidea\_sp19\_Curc.idba.49 MMG\_ANNOT\_FROM\_TREE  
CP1Cur3At4R5Aul7neb Auletes nebulosus NCBI  
CP1Cur3 Curculionoidea\_sp13\_Curc.idba.32 MMG\_ANNOT\_FROM\_TREE  
CP1Cur3C4Ph1p7la Philopodon plagiatum NCBI  
CP1Cur3C4E5 Entiminae\_sp3\_Curc.idba.57 MMG\_ANNOT\_FROM\_BARCODE  
CP1Cur3C4 Curculionidae\_sp\_KM244695  
CP1Cur3C4MT2014\_Curculionidae\_MT2014 NCBI  
CP1Cur3C4E5B6St7 Strophosoma sp\_Curc.idba.29 MMG\_ANNOT\_FROM\_BARCODE  
CP1Cur3C4E5B6St7cap Strophosoma capitatum NCBI  
CP1Cur3C4E5B6St7 Strophosoma\_sp\_BIUK.idba.58 MMG\_ANNOT\_FROM\_BARCODE  
CP1Cur3C4E5B6St7 Strophosoma\_sp\_BIUK.idba.73 MMG\_ANNOT\_FROM\_BARCODE  
CP1Cur3C4E5B6St7mel Strophosoma melanogrammum JN163949 MERGED  
CP1Cur3 Curculionoidea\_sp16\_Soil.idba.98 MMG\_ANNOT\_FROM\_TREE  
CP1Cur3 Curculionoidea\_sp9\_Soil.idba.55 MMG\_ANNOT\_FROM\_TREE  
CP1Cur3 Curculionoidea\_sp8\_Soil.idba.53 MMG\_ANNOT\_FROM\_TREE  
CP1Cur3C4E5B6Br7inc Brachyderes incanus NCBI  
CP1Cur3 Curculionoidea\_sp1\_Curc.idba.10 MMG\_ANNOT\_FROM\_TREE  
CP1Cur3C4E50t60t7auro Otiiorhynchus auropunctatus NCBI  
CP1Cur3C4E50t60t7glo Otiiorhynchus globulus Curc.idba.52 MMG\_ANNOT\_FROM\_BARCODE  
CP1Cur3C4E50t60t7sul Otiiorhynchus sulcatus Curc.idba.36 MERGED MMG\_ANNOT\_FROM\_BARCODE  
CP1Cur3C4E50t60t7por Otiiorhynchus porcatus NCBI  
CP1Cur3C4E50t60t7ligu Otiiorhynchus ligustici NCBI  
CP1Cur3C4E50t60t7rug Otiiorhynchus rugosostriatus JN163969 MERGED  
CP1Cur3C4E5T6Tr7ele Tropiphorus elevatus amie.idba.114 MERGED MMG\_ANNOT\_FROM\_BARCODE  
CP1Cur3C4E5T6Tr7ber Tropiphorus bertolini Curc.idba.18 MMG\_ANNOT\_FROM\_BARCODE  
CP1Cur3C4E50t60t7cra Otiiorhynchus crataegi NCBI  
CP1Cur3C4E50t60t7rau Otiiorhynchus raucus NCBI  
CP1Cur3C4E50t60t7ful Otiiorhynchus fullo NCBI  
CP1Cur3C4E50t60t7ova Otiiorhynchus ovatus NCBI  
CP1Cur3C4E50t60t7lae Otiiorhynchus laevigatus NCBI  
CP1Cur3C4E50t7sa Otiiorhynchus salicicola NCBI  
CP1Cur3C4E50t60t7coe Otiiorhynchus coesus NCBI  
CP1Cur3C4E50t60t7arm Otiiorhynchus armadillo NCBI  
CP1Cur3C4E50t60t7mor Otiiorhynchus morio amie.idba.90 MERGED MMG\_ANNOT\_FROM\_BARCODE  
CP1Cur3C4E50t60t7aur Otiiorhynchus aurifer NCBI  
CP1Cur3C4E50t60t7ten Otiiorhynchus tenebricosus NCBI  
CP1Cur3C4E50t60t7lep Otiiorhynchus lepidopterus NCBI  
CP1Cur3C4E50t60t7vau Otiiorhynchus vaucheri NCBI  
CP1Cur3 Curculionoidea\_sp13\_Soil.idba.80 MMG\_ANNOT\_FROM\_TREE  
CP1Cur3C4E50t60t7sin Otiiorhynchus singularis NCBI  
CP1Cur3C4E50t60t7sca Otiiorhynchus scaber NCBI  
CP1Cur3C4E50t60t7nod Otiiorhynchus nodosus NCBI  
CP1Cur3C4E5M7 Myorhynini sp\_Curc.idba.55 MMG\_ANNOT\_FROM\_BARCODE  
CP1Cur3C4E5 Entiminae\_sp\_JX412810  
CP1Cur3C4E5Le6Ec7bov Ecrizothis boviei NCBI  
CP1Cur3C4E50t6Sc7 Scioobius sp\_JX412782  
CP1Cur3 Curculionoidea\_sp5\_Soil.idba.191 MMG\_ANNOT\_FROM\_TREE  
CP1Cur3 Curculionoidea\_sp15\_Soil.idba.96 MMG\_ANNOT\_FROM\_TREE  
CP1Cur3C4E5T6Ma7MAM3 Malvinus MAM3 NCBI  
CP1Cur3C4E5T6Ma7nor Malvinus nordenskioeldi NCBI  
CP1Cur3C4E5T6Ma7com Malvinus compressiventris NCBI  
CP1Cur3C4E5Tr6Tr7ang Trachyphloeus angustisetulus amie.idba.152 MMG\_ANNOT\_FROM\_BARCODE  
CP1Cur3C4E5Tr6Tr7ang Trachyphloeus angustisetulus amie.idba.136 MMG\_ANNOT\_FROM\_BARCODE  
CP1Cur3C4E5Tr6Tr7ang Trachyphloeus angustisetulus Curc.idba.74 MMG\_ANNOT\_FROM\_BARCODE  
CP1Cur3Bra4B5S7hi7 Simo hirticornis NCBI  
CP1Cur3C4E5P6Ce7leu Centricnemus leucogrammus NCBI  
CP1Cur3C4E5P6Pe7sph Peritelus sphaeroides NCBI  
CP1Cur3C4E5P6Ps7obs Pseudomeira obscura NCBI  
CP1Cur3C4E5P6Ps7obs Pseudomeira obscura NCBI  
CP1Cur3C4E5C6o7BMNH668165 Ophthalmus BMNH668165 NCBI  
CP1Cur3C4G5Ox7NLG2014 Oxyops NLG2014 NCBI  
CP1Cur3C4G5Ox7bil Oxyops bilunaris NCBI  
CP1Cur3C4G5G7pul Gonipterus pulverulentus NCBI  
CP1Cur3C4C5P6Par7arc Pantoretites arctatus NCBI  
CP1Cur3C4Cy5Rh17fov Rhinoplethes foveatus NCBI  
CP1Cur3C4C5S6No7aus Notionomus australis NCBI  
CP1Cur3C4E50tt6NLG2014 Entiminae\_NLG2014 NCBI  
CP1Cur3C4E50tt6Ma7spi Maleuterpes spinipes NCBI  
CP1Cur3C4E50tt6Eu7NLG2014 Eutinophaea NLG2014 NCBI  
CP1Cur3 Curculionoidea\_sp14\_Curc.idba.35 MMG\_ANNOT\_FROM\_TREE  
CP1Cur3C4E5F6M7MFC2014 Malvinus MFC2014 NCBI

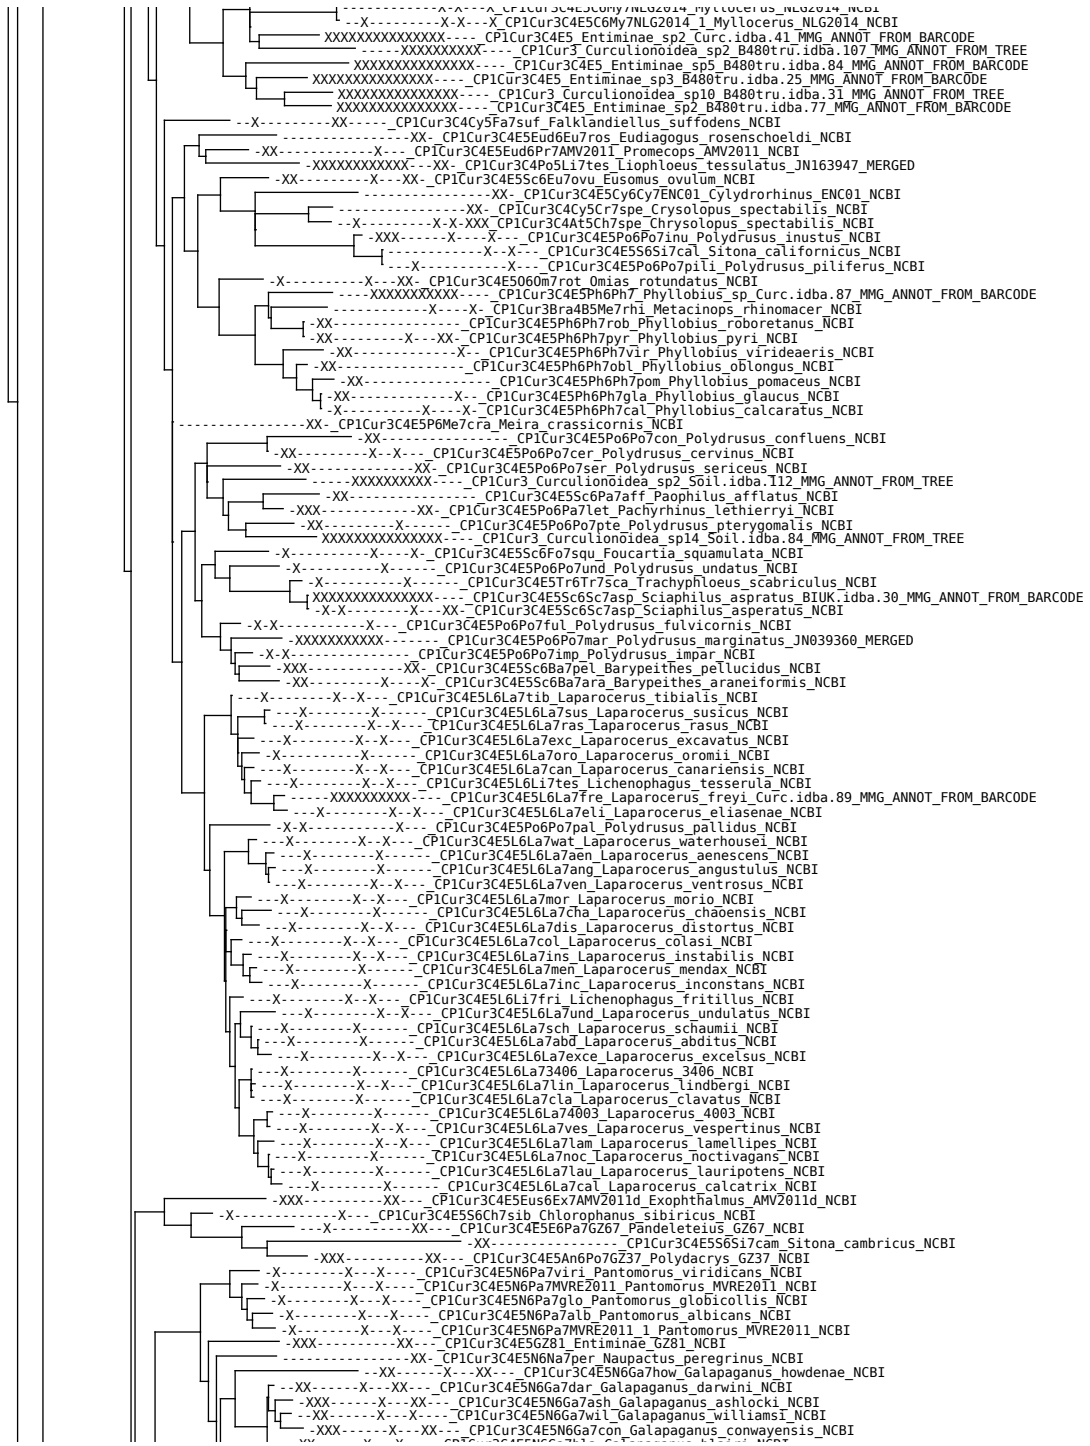

--XX-----X---X---\_CP1Cur3C4E5N6a7bla Galapaganus\_blaif1\_NCB1  
-XXX-----X---X---\_CP1Cur3C4E5N6a7gal Galapaganus\_galapagensis\_NCB1  
-XXX-----X-X-XX--\_CP1Cur3C4E5N6a7car Galapaganus\_caroli\_NCB1  
-XXX-----X---XX--\_CP1Cur3C4E5N6a7van Galapaganus\_vandykei\_NCB1  
-XXX-----X---XX--\_CP1Cur3C4E5N6a7col Galapaganus\_collaris\_NCB1  
-XXX-----X-X-XX--\_CP1Cur3C4E5N6a7ver Naupactus\_verecundus\_NCB1  
-XX-----X---X---\_CP1Cur3C4E5N6Pa7rui Pantomorus\_ruizi\_NCB1  
-XXX-----X-X-XX--\_CP1Cur3C4E5N6Na7leu Naupactus\_leucomola\_NCB1  
-XX-----X---X---\_CP1Cur3C4E5N6Na7nav Naupactus\_navicularis\_NCB1  
-XX-----X---X---\_CP1Cur3C4E5N6Na7cin Naupactus\_cinereidorsum\_NCB1  
-XX-----X---X---\_CP1Cur3C4E5N6Pa7aur Pantomorus\_auripes\_NCB1  
-X-----X---X---\_CP1Cur3C4E5N6Pa7zeta Mecopelemus\_zeteki\_NCB1  
XXXXXXXXXX-----CP1Cur3C4E5N6Li7pud Litostylus\_pudens\_Curc.idba.90\_MMG\_ANNOT\_FROM\_BARCODE  
-XX-----X---X---\_CP1Cur3C4E5N6Li7AMV2011b Litostylus\_AMV2011b\_NCB1  
-XX-----XX---\_CP1Cur3C4E5N6Li7AMV2011a Litostylus\_AMV2011a\_NCB1  
-X-----X---X---\_CP1Cur3C4E5N6Pa7stu Pantomorus\_stupidus\_NCB1  
-X-----X---X---\_CP1Cur3C4E5N6Na7sul Naupactus\_sulfuratus\_NCB1  
-X-----XX---\_CP1Ch3C4L5La7LP01 Lamprosoma\_LP01\_NCB1  
XXXXXXXXXXXXXXXXXXXXCP1Cur3C4E5N6Na7xan Naupactus\_xanthographus\_NC\_018354\_MERGED  
-XXX-----X---X---\_CP1Cur3C4E5N6Na7amb Naupactus\_ambiguus\_NCB1  
-XXX-----X---X---\_CP1Cur3C4E5N6Pa7cin Pantomorus\_cinerosus\_NCB1  
-X-X-----X---XX--\_CP1Cur3C4E5N6Na7dis Naupactus\_dissimulator\_NCB1  
-XX-----X---XX--\_CP1Cur3C4E5N6Pa7vivi Pantomorus\_vividissimus\_NCB1  
-XX-----X---XX--\_CP1Cur3C4E5N6Eu7bit Eurymetopus\_birabeni\_NCB1  
-XX-----X---X---\_CP1Cur3C4E5N6Na7min Naupactus\_minor\_NCB1  
-XXX-----X---X---\_CP1Cur3C4E5N6Ar7tes Aramigus\_tessellatus\_NCB1  
-XX-----X---X---\_CP1Cur3C4E5N6Te7nod Teratopactus\_nodicollis\_NCB1  
-XXX-----X-X-XXX-CP1Cur3C4E5N6A57cer Asynonychus\_cervinus\_NCB1  
-X-----X-X---X-CP1Cur3C4E5Le6Pe7NLG2014 Perperus\_NLG2014\_NCB1  
-X-----X-X---X-CP1Cur3C4E5Le6Me7NLG2014 Merimnetes\_NLG2014\_NCB1  
-X-----X-X---X-CP1Cur3C4E5Le7NLG2014 Leptopus\_NLG2014\_NCB1  
-X-XX-----X-XX--\_CP1Cur3C4E5Eu6Ce7EMC2007\_Celebia\_EMC2007\_NCB1  
-X-XX-----X-XX--\_CP1Cur3C4E5Eu6Ce7EMC2007\_1 Celebia\_EMC2007\_NCB1  
-XX-----X-XX--\_CP1Cur3C4Le5Le7ENN01 Leptopus\_ENN01\_NCB1  
-XXX-CP1Cur3C4E5Eu6Gy7DDM2009 Gymnophlus\_DDM2009\_NCB1  
-X-----X-X---X-CP1Cur3C4E5Le6Po7NLG2014\_1 Polyphrades\_NLG2014\_NCB1  
-X-----X-X---X-CP1Cur3C4E5Le6Po7NLG2014 Polyphrades\_NLG2014\_NCB1  
-X-X-----X-X---X-CP1Cur3C4E5Le6Ma7NLG2014 Mandalotus\_NLG2014\_NCB1  
-X-----X-X---X-CP1Cur3C4E5Le6Ev7NLG2014 Evas\_NLG2014\_NCB1  
XXXXXXXXXXXXXXXXXXXXCP1Cur3C4Le5Le7 Leptopus\_sp\_Curc.idba.84\_MMG\_ANNOT\_FROM\_BARCODE  
-X-----X-X---X-CP1Cur3C4E5Le6NLG2014 Entiminae\_NLG2014\_NCB1  
-X-X-----X-X---X-CP1Cur3Bra4B5Ca7imp Cata sarcus\_impressipennis\_NCB1  
XXXXXXXXXXXXCP1Cur3Bra4B5Ca7 Cata sarcus\_sp\_Curc.idba.91\_MMG\_ANNOT\_FROM\_BARCODE  
-XX-----X-XX--\_CP1Cur3C4E5E16E7bic Besmytrurus\_bicolor\_NCB1  
-X-XX-----X-XX--\_CP1Cur3C4E5E16E7exp Elytrurus\_expansus\_NCB1  
-X-XX-----X-XX--\_CP1Cur3C4E5E16E7cin Elytrurus\_cinctus\_NCB1  
-X-XX-----X-XX--\_CP1Cur3C4E5E16E7gre Elytrurus\_greenwoodi\_NCB1  
-X-XX-----X-XX--\_CP1Cur3C4E5E16E7sim Elytrurus\_simmondsi\_NCB1  
-X-XX-----X-XX--\_CP1Cur3C4E5R6Rh7nig Rhyncogonus\_nigerrimus\_NCB1  
-X-XX-----X-XX--\_CP1Cur3C4E5R6Rh7lon Rhyncogonus\_tongulus\_NCB1  
-X-XX-----X-XX--\_CP1Cur3C4E5R6Rh7nod Rhyncogonus\_nodosus\_NCB1  
-XX-----X-XX--\_CP1Cur3C4E5R6Rh7ruf Rhyncogonus\_rufulus\_NCB1  
-X-XX-----X-XX--\_CP1Cur3C4E5R6Rh7exc Rhyncogonus\_excavatus\_NCB1  
-X-XX-----X-XX--\_CP1Cur3C4E5R6Rh7his Rhyncogonus\_hispidus\_NCB1  
-X-XX-----X-XX--\_CP1Cur3C4E5R6Rh7ten Rhyncogonus\_tenebrosus\_NCB1  
-X-XX-----X-XX--\_CP1Cur3C4E5R6Rh7lin Rhyncogonus\_lineatus\_NCB1  
-X-XX-----X-XX--\_CP1Cur3C4E5R6Rh7tes Rhyncogonus\_testudineus\_NCB1  
-X-XX-----X-XX--\_CP1Cur3C4E5R6Rh7cor Rhyncogonus\_cordiformis\_NCB1  
-X-XX-----X-XX--\_CP1Cur3C4E5R6Rh7pul Rhyncogonus\_pulvereus\_NCB1  
-X-XX-----X-XX--\_CP1Cur3C4E5R6Rh7exp Rhyncogonus\_expansus\_NCB1  
-X-XX-----X-XX--\_CP1Cur3C4E5R6Rh7ven Rhyncogonus\_ventralis\_NCB1  
-X-XX-----X-XX--\_CP1Cur3C4E5R6Rh7nigr Rhyncogonus\_nigroaeneus\_NCB1  
-X-XX-----X-XX--\_CP1Cur3C4E5R6Rh7ful Rhyncogonus\_fulvus\_NCB1  
-X-XX-----X-XX--\_CP1Cur3C4E5R6Rh7opa Rhyncogonus\_opacipennis\_NCB1  
-X-XX-----X-XX--\_CP1Cur3C4E5R6Rh7cau Rhyncogonus\_caudatus\_NCB1  
-X-XX-----X-XX--\_CP1Cur3C4E5R6Rh7pec Rhyncogonus\_pectoralis\_NCB1  
-X-XX-----X-XX--\_CP1Cur3C4E5R6Rh7tube Rhyncogonus\_tuberosus\_NCB1  
-X-XX-----X-XX--\_CP1Cur3C4E5R6Rh7tub Rhyncogonus\_tuberculatus\_NCB1  
-X-XX-----X-XX--\_CP1Cur3C4E5R6Rh7ric Rhyncogonus\_ricei\_NCB1  
-X-XX-----X-XX--\_CP1Cur3C4E5R6Rh7squ Rhyncogonus\_squamiger\_NCB1  
-X-XX-----X-XX--\_CP1Cur3C4E5R6Rh7kah Rhyncogonus\_kahili\_NCB1  
-X-X-----X-X---\_CP1Cur3C4E5R6Rh7ste Rhyncogonus\_stellaris\_NCB1  
-X-XX-----X-XX--\_CP1Cur3C4E5R6Rh7sal Rhyncogonus\_saltus\_NCB1  
-X-XX-----X-XX--\_CP1Cur3C4E5R6Rh7lah Rhyncogonus\_lahaina\_NCB1  
-X-XX-----X-XX--\_CP1Cur3C4E5R6Rh7gra Rhyncogonus\_gracilis\_NCB1  
-X-XX-----X-XX--\_CP1Cur3C4E5R6Rh7oth Rhyncogonus\_othello\_NCB1  
-X-XX-----X-XX--\_CP1Cur3C4E5R6Rh7ere Rhyncogonus\_erebus\_NCB1  
-X-XX-----X-XX--\_CP1Cur3C4E5R6Rh7ang Rhyncogonus\_angustus\_NCB1  
-X-XX-----X-XX--\_CP1Cur3C4E5R6Rh7ple Rhyncogonus\_pleuralis\_NCB1  
-X-XX-----X-XX--\_CP1Cur3C4E5R6Rh7vir Rhyncogonus\_viridescens\_NCB1  
-X-XX-----X-XX--\_CP1Cur3C4E5R6Rh7int Rhyncogonus\_interstitialis\_NCB1  
-X-XX-----X-XX--\_CP1Cur3C4E5R6Rh7alb Rhyncogonus\_albipilis\_NCB1  
-X-XX-----X-XX--\_CP1Cur3C4E5R6Rh7bre Rhyncogonus\_brevis\_NCB1  
-X-XX-----X-XX--\_CP1Cur3C4E5R6Rh7nav Rhyncogonus\_navicularis\_NCB1  
-X-XX-----X-XX--\_CP1Cur3C4E5R6Rh7oti Rhyncogonus\_otiorhynchoides\_NCB1  
-X-XX-----X-XX--\_CP1Cur3C4E5R6Rh7corv Rhyncogonus\_corvus\_NCB1  
-X-XX-----X-XX--\_CP1Cur3C4E5R6Rh7exi Rhyncogonus\_aximius\_NCB1  
-X-XX-----X-XX--\_CP1Cur3C4E5R6Rh7lat Rhyncogonus\_lateralis\_NCB1  
-X-XX-----X-XX--\_CP1Cur3C4E5R6Rh7pla Rhyncogonus\_planatus\_NCB1  
-X-XX-----X-XX--\_CP1Cur3C4E5R6Rh7ada Rhyncogonus\_adamsoni\_NCB1  
-X-XX-----X-XX--\_CP1Cur3C4E5R6Rh7mum Rhyncogonus\_mumfordi\_NCB1  
-X-XX-----X-XX--\_CP1Cur3C4E5R6Rh7och Rhyncogonus\_ochraceus\_NCB1  
-X-XX-----X-XX--\_CP1Cur3C4E5R6Rh7dup Rhyncogonus\_duplex\_NCB1  
XXXXXXXXXXCP1Cur3C4E5Op60p7 Ophryastes\_sp\_Curc.idba.114\_MMG\_ANNOT\_FROM\_BARCODE  
-X-----X-CP1Cur3C4M5Ph6C17NLG2014 Cisolea\_NLG2014\_NCB1  
XXXXXXXXXXCP1Cur3C4E5Op60p7 Ophryastes\_sp\_Curc.idba.97\_MMG\_ANNOT\_FROM\_BARCODE  
-X-XX-----X-XX--\_CP1Cur3C4E5T6D7EMC2007\_Dyslobus\_EMC2007\_NCB1  
-X-XX-----X-XX--\_CP1Cur3C4E5T6Dy7EMC2007\_Dyslobus\_EMC2007\_NCB1  
-XXX-----XX---\_CP1Cur3C4E5E6Pa7AMV2011a Pandeleteius\_AMV2011a\_NCB1  
-XX-----X---X---\_CP1Cur3C4E5E6Pa7nod Pandeleteius\_nodifer\_NCB1

XXXXXXXXXXXXXXXXX CP1Cur3C4E5 Entiminae sp1\_Curc.idba.25 MMG ANNOT FROM BARCODE  
XXXXXXXXXXXXXXXXX CP1Cur3C4E5G67 Geotragus sp\_Curc.idba.15 MMG ANNOT FROM BARCODE  
-X- CP1Cur3C4E5G67vir Chlorophanus viridis NCBI  
-X- CP1Cur3C4E5L6Dr73989 Drouetius 3989 NCBI  
-X- CP1Cur3C4E5L6Dr7azo Drouetius azoricus NCBI  
XXXXXXXXXXXXXXXXX CP1Cur3C4E5Cr6Cr7sum CraTopus sumpuosus\_Curc.idba.65 MMG ANNOT FROM BARCODE  
-X- CP1Cur3C4E5Pac6Pa7sta Pantorhytes stanleyanus NCBI  
-X- CP1Cur3C4E5Ce6Or7alb Oribius albivarius NCBI  
-X-XX- CP1Cur3C4E5Ce6Sp7vil Sphaerorhinus villulosus NCBI  
-X-XX- CP1Cur3C4E5Ce6Cn7EMC2007 Cnemidothrix EMC2007 NCBI  
-X-XX- CP1Cur3C4E5Ce6Le7EMC2007\_1 Leveocus EMC2007 NCBI  
-X-XX- CP1Cur3C4E5Ce6Le7EMC2007 Leveocus EMC2007 NCBI  
-X-XX- CP1Cur3C4E5Ce6P7lms Platysimus insularis NCBI  
-X-XX- CP1Cur3C4E5Ce6Sap7 Sameobius puncticolis NCBI  
-XX- CP1Cur3C4E5Ce6Ph7EMC2007 Phraotes EMC2007 NCBI  
-X-XX- CP1Cur3C4E5Ce6He7EMC2007 Heteroglymma EMC2007 NCBI  
-X-XX- CP1Cur3C4E5Ce6He7EMC2007\_1 Heteroglymma EMC2007 NCBI  
-X-XX- CP1Cur3C4E5Ce6Co7EMC2007 Coptorhynchus EMC2007 NCBI  
-X-XX- CP1Cur3C4E5Ce6Co7EMC2007\_1 Coptorhynchus EMC2007 NCBI  
-X-XXXX- CP1Cur3C4E5T6Sp7DDM2009 Spartecerus DDM2009 NCBI  
-X-XX- CP1Cur3C4E5Ce6Co7EMC2007\_2 Coptorhynchus EMC2007 NCBI  
-XXX- CP1Cur3C4E5GZ34 Entiminae GZ34 NCBI  
-X- CP1Cur3C4E5N6Art7BOL Artipus BOL NCBI  
-XXX- CP1Cur3C4E5Eus6E7AMV2011a Xestogaster AMV2011a NCBI  
-XX- CP1Cur3C4E5Eus6E7AMV2011b Xestogaster AMV2011b NCBI  
-XXX- CP1Cur3C4E5Eus6Co7GZ134 Compus GZ134 NCBI  
-XX- CP1Cur3C4E5Eus6Eu7hyb EustyLus hybridus NCBI  
-XXX- CP1Cur3C4E5E6Sce7ely Scelianoma elydimorpha NCBI  
-X-XX- CP1Cur3C4E5GZ72 Entiminae GZ72 NCBI  
-XXX- CP1Cur3C4E5Ba6Ap7GZ59 Apotomoderes GZ59 NCBI  
-X-XX- CP1Cur3C4E5GZ76 Entiminae GZ76 NCBI  
-XX- CP1Cur3C4E5N6Art7AMV2011a Artipus AMV2011a NCBI  
-XX- CP1Cur3C4E5N6Art7AMV2011b Artipus AMV2011b NCBI  
-XXX- CP1Cur3C4E5N6Art7mon Artipus monae NCBI  
-XX- CP1Cur3C4E5AMV2011e Entiminae AMV2011e NCBI  
-XX- CP1Cur3C4E5AMV2011a Entiminae AMV2011a NCBI  
-XX- CP1Cur3C4E5AMV2011b Entiminae AMV2011b NCBI  
-XXX- CP1Cur3C4E5Ba6Ap7men Apotomoderes menocrater NCBI  
-XX- CP1Cur3C4E5Ba6Ap7sot Apotomoderes sotomayorae NCBI  
-XXX- CP1Cur3C4E5G6La7GZ15 Lachnopus GZ15 NCBI  
-XX- CP1Cur3C4E5G6Is7niv Ischionoplus niveoguttatus NCBI  
-XX- CP1Cur3C4E5AMV2011c Entiminae AMV2011c NCBI  
-XX- CP1Cur3C4E5AMV2011d Entiminae AMV2011d NCBI  
-XX- CP1Cur3C4E5G6La7AMV2011b Lachnopus AMV2011b NCBI  
-XX- CP1Cur3C4E5G6La7AMV2011a Lachnopus AMV2011a NCBI  
-XX- CP1Cur3C4E5G6La7AMV2011c Lachnopus AMV2011c NCBI  
-XXX- CP1Cur3C4E5G6La7GZ12 Lachnopus GZ12 NCBI  
-XX- CP1Cur3C4E5AMV2011f Entiminae AMV2011f NCBI  
XXXXXXXXXXXXXXXXX CP1Cur3\_Curculionoidea sp18\_Curc.idba.46 MMG ANNOT FROM TREE  
-X- CP1Cur3C4E5ACP2013\_3 Entiminae ACP2013 NCBI  
-XXX- CP1Cur3C4E5G6La7GZ22 Lachnopus GZ22 NCBI  
-XXX- CP1Cur3C4E5G6La7kof Lachnopus kofresi NCBI  
-XXX- CP1Cur3C4E5G6La7GZ91 Lachnopus GZ91 NCBI  
-XX- CP1Cur3C4E5G6La7cof Lachnopus coffeae NCBI  
-XXX- CP1Cur3C4E5G6La7AMV2011d Lachnopus AMV2011d NCBI  
-XXX- CP1Cur3C4E5G6La7sei Lachnopus sei NCBI  
-XX- CP1Cur3C4E5S6Ta7BF2000 Tanymecus BF2000 NCBI  
-X- CP1Cur3C4E5S6Ta7DDM2009 Tanymecus DDM2009 NCBI  
-XXX- CP1Cur3C4E5Be7ell Bepharus ellipticus NCBI  
-XX- CP1Cur3C4E5Po6AMV2011a Entiminae AMV2011a NCBI  
-XX- CP1Cur3C4E5Po6Ap7wol Apodrosus wolcotti NCBI  
-XX- CP1Cur3C4E5Po6Ap7qui Apodrosus quisqueyanus NCBI  
-XXX- CP1Cur3C4E5Po6Ap7arg Apodrosus argentatus NCBI  
-X- CP1Cur3C4E5Ph6Ph7arg Phyllobius argentatus NCBI  
-XX- CP1Cur3C4E5Po6Ap7epi Apodrosus epipoLevatus NCBI  
-XXX- CP1Cur3C4E5Eus6Ex7AMV2011b Exophthalmus AMV2011b NCBI  
-XXX- CP1Cur3C4E5Eus6Ex7AMV2011c Exophthalmus AMV2011c NCBI  
-XXX- CP1Cur3C4E5Eus6Ex7AMV2011e Exophthalmus AMV2011e NCBI  
-XX- CP1Cur3C4E5Eus6Te7spe Tetrabothynus spectabilis NCBI  
-X- CP1Cur3C4E5G6Tr7GZ2015 Tropirhinus GZ2015 NCBI  
-X- CP1Cur3C4E5Eus6Ex7GZ45 Exophthalmus GZ45 NCBI  
-XXX- CP1Cur3C4E5Eus6Com7mar Compsoicus maricao NCBI  
-XXX- CP1Cur3C4E5Eus6Ex7GZ49 Exophthalmus GZ49 NCBI  
-XXX- CP1Cur3C4E5Eus6Ex7hyb Exophthalmus hybridus NCBI  
-XXX- CP1Cur3C4E5G6Tr7GZ47 Tropirhinus GZ47 NCBI  
-XXX- CP1Cur3C4E5G6Tr7GZ22 Tropirhinus GZ22 NCBI  
-XXX- CP1Cur3C4E5G6Tr7GZ50 Tropirhinus GZ50 NCBI  
-XXX- CP1Cur3C4E5G6Tr7ele Tropirhinus elegans NCBI  
-XX- CP1Cur3C4E5Eus6Ex7AMV2011a Exophthalmus AMV2011a NCBI  
-XXX- CP1Cur3C4E5G6Tr7GZ46 Tropirhinus GZ46 NCBI  
-XXX- CP1Cur3C4E5Eus6Ex7AMV2011f Exophthalmus AMV2011f NCBI  
-XX- CP1Cur3C4E5G6La7atr Lachnopus atramentarius NCBI  
-XXX- CP1Cur3C4E5Eus6Ex7cin Exophthalmus cinerascens NCBI  
-XXX- CP1Cur3C4E5Eus6Ex7AMV2011h Exophthalmus AMV2011h NCBI  
-XXX- CP1Cur3C4E5Eus6Ex7AMV2011i Exophthalmus AMV2011i NCBI  
-XXX- CP1Cur3C4E5Eus6Ex7GZ155 Exophthalmus GZ155 NCBI  
-X- CP1Cur3C4E5Eus6Rn7alb Rhinospathe albomarginata NCBI  
-X- CP1Cur3C4E5Eus6GZ73 Exophthalmus GZ73 NCBI  
-X-X- CP1Cur3C4E5Eus6Ex7sca Exophthalmus scalaris NCBI  
-XXX- CP1Cur3C4E5Eus6Ex7qui Exophthalmus quindecimpunctatus NCBI  
-XXX- CP1Cur3C4E5Eus6Ex7AMV2011g Exophthalmus AMV2011g NCBI  
-XXX- CP1Cur3C4E5Eus6Ex7qua Exophthalmus quadrivittatus NCBI  
-XXX- CP1Cur3C4E5Eus6Ex7sul Exophthalmus sulphuratus NCBI  
-XXX- CP1Cur3C4E5Eus6Ex7pic Exophthalmus pictus NCBI  
-X- CP1Cur3C4E5Eus6Ex7GZ148 Exophthalmus GZ148 NCBI  
-XXX- CP1Cur3C4E5Eus6Ex7GZ165 Exophthalmus GZ165 NCBI  
-XXX- CP1Cur3C4E5Eus6Ex7GZ166 Exophthalmus GZ166 NCBI  
-XX- CP1Cur3C4E5Eus6Ch7adi Chaulioperus adipatus NCBI  
-X- CP1Cur3C4E5Eus6Ex7GZ65 Exophthalmus GZ65 NCBI  
-XXX- CP1Cur3C4E5Eus6Ex7jek Exophthalmus jekelianus NCBI



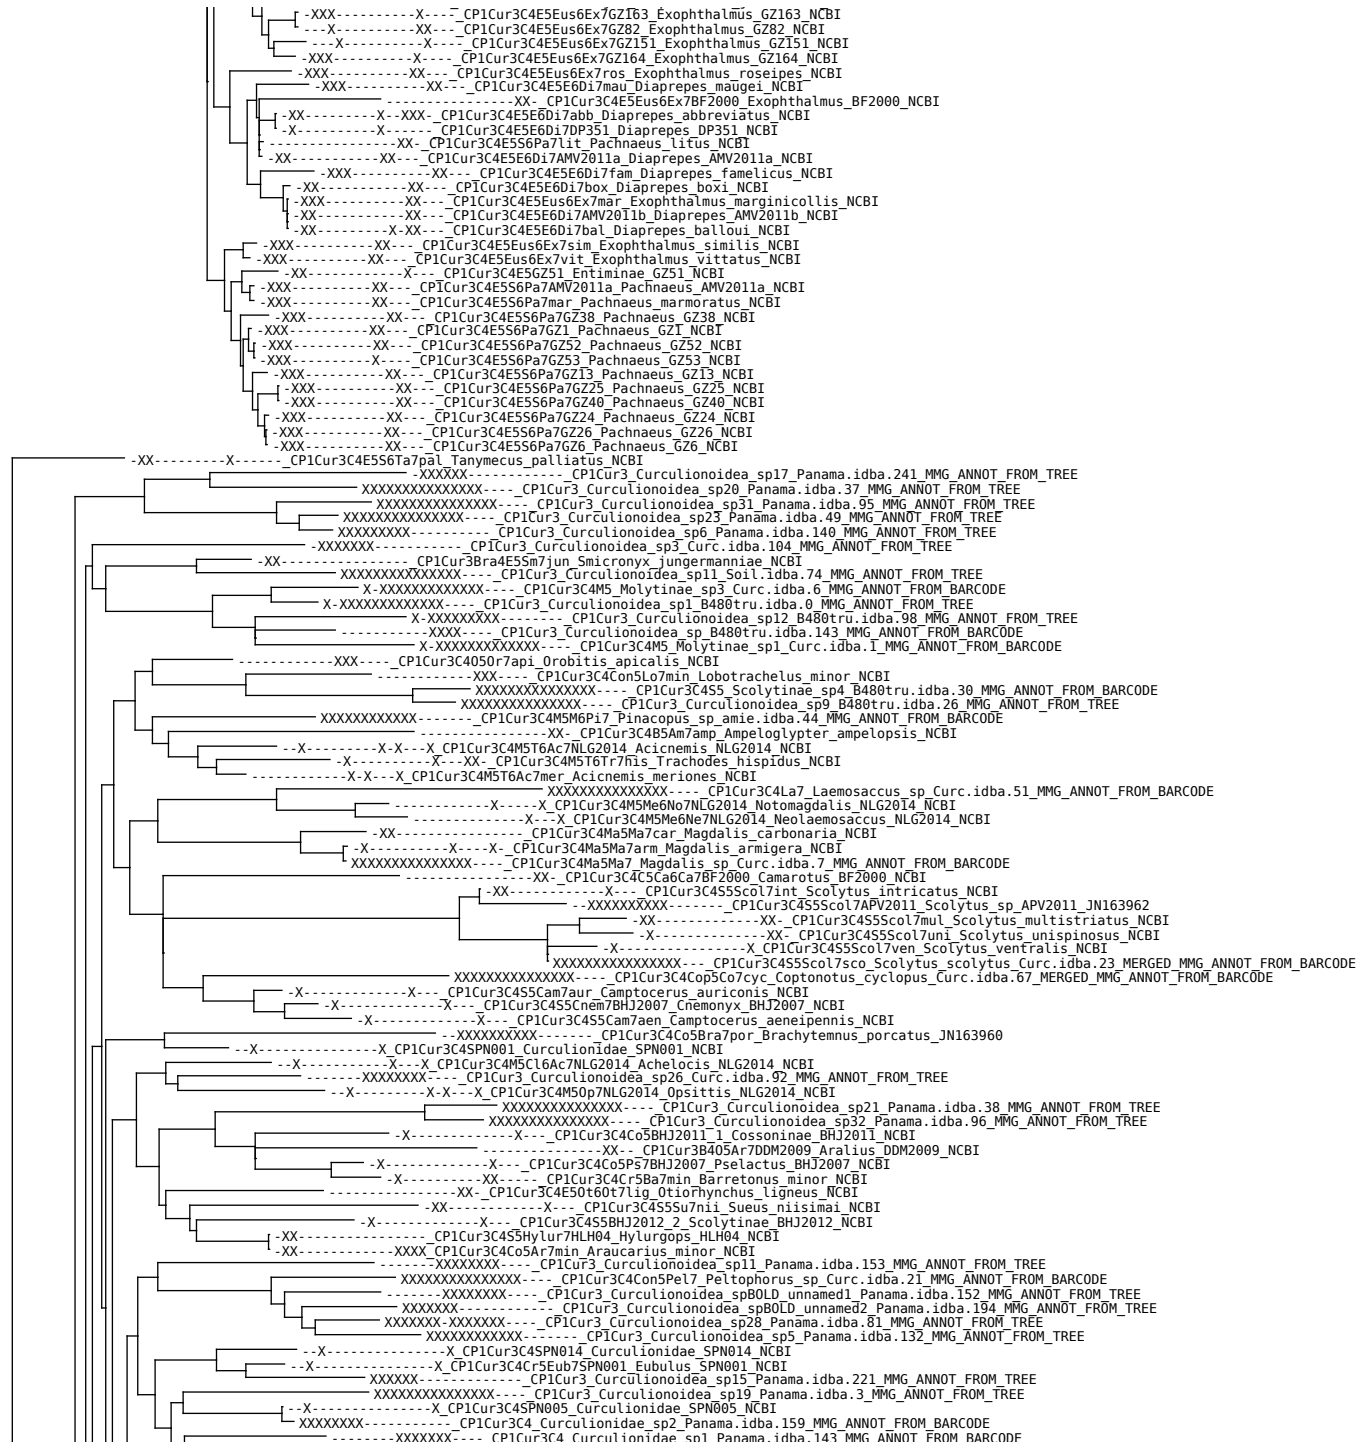

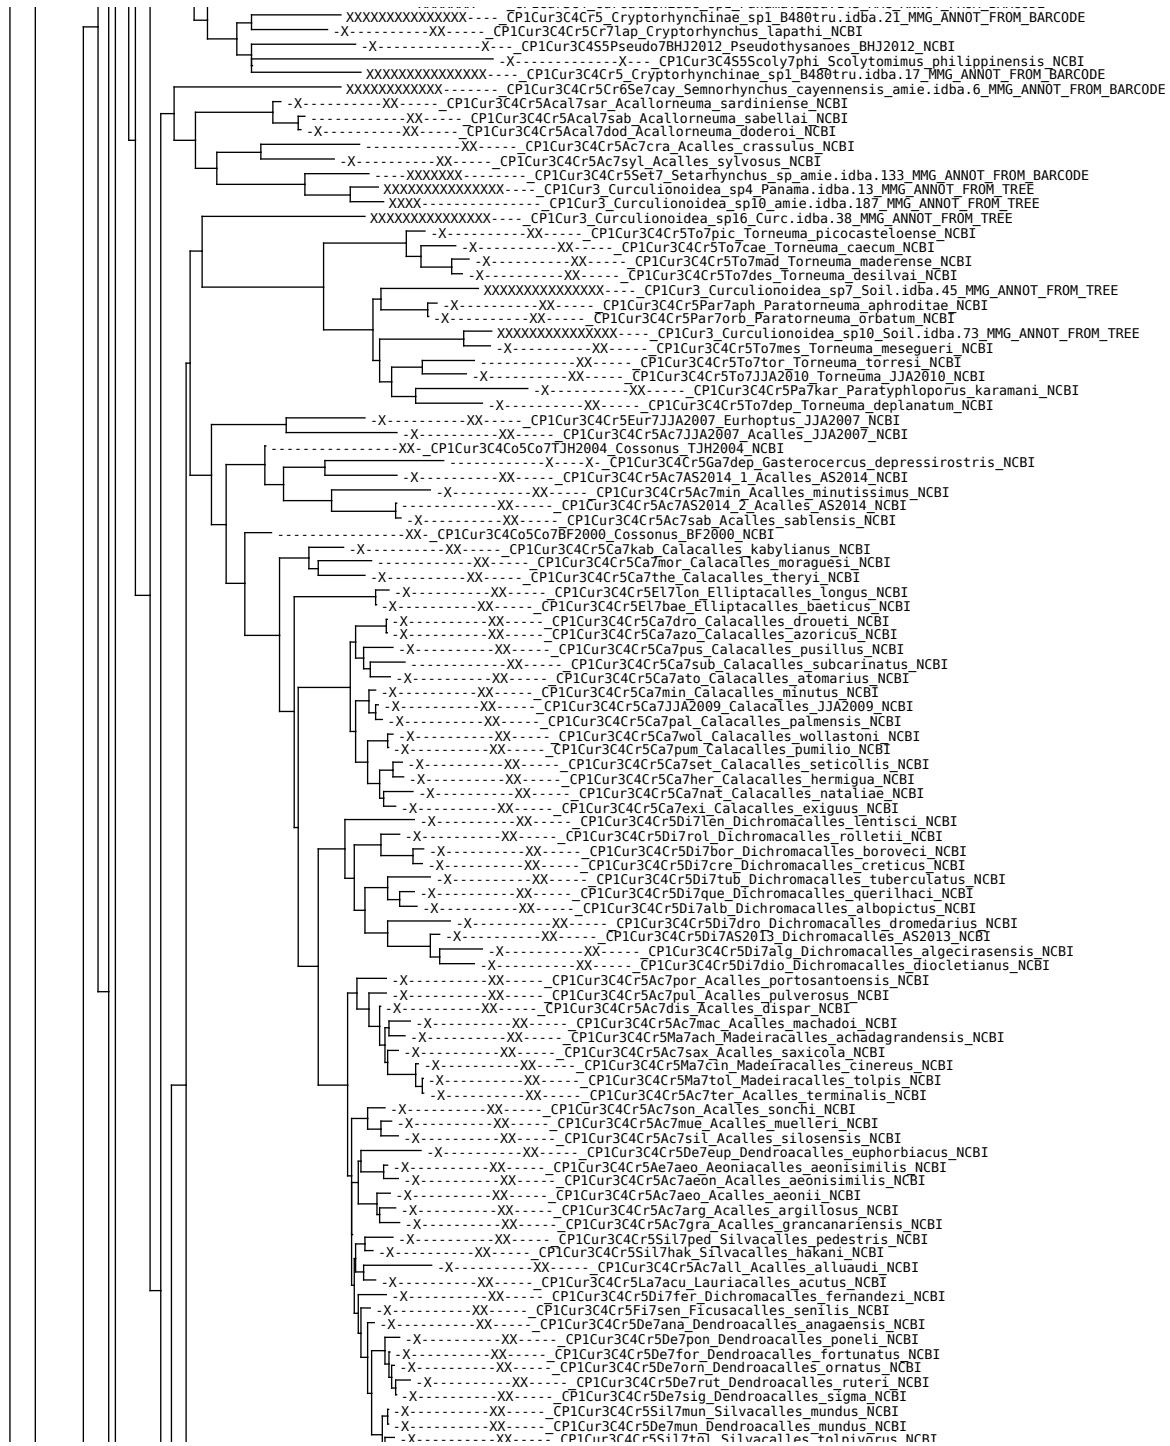

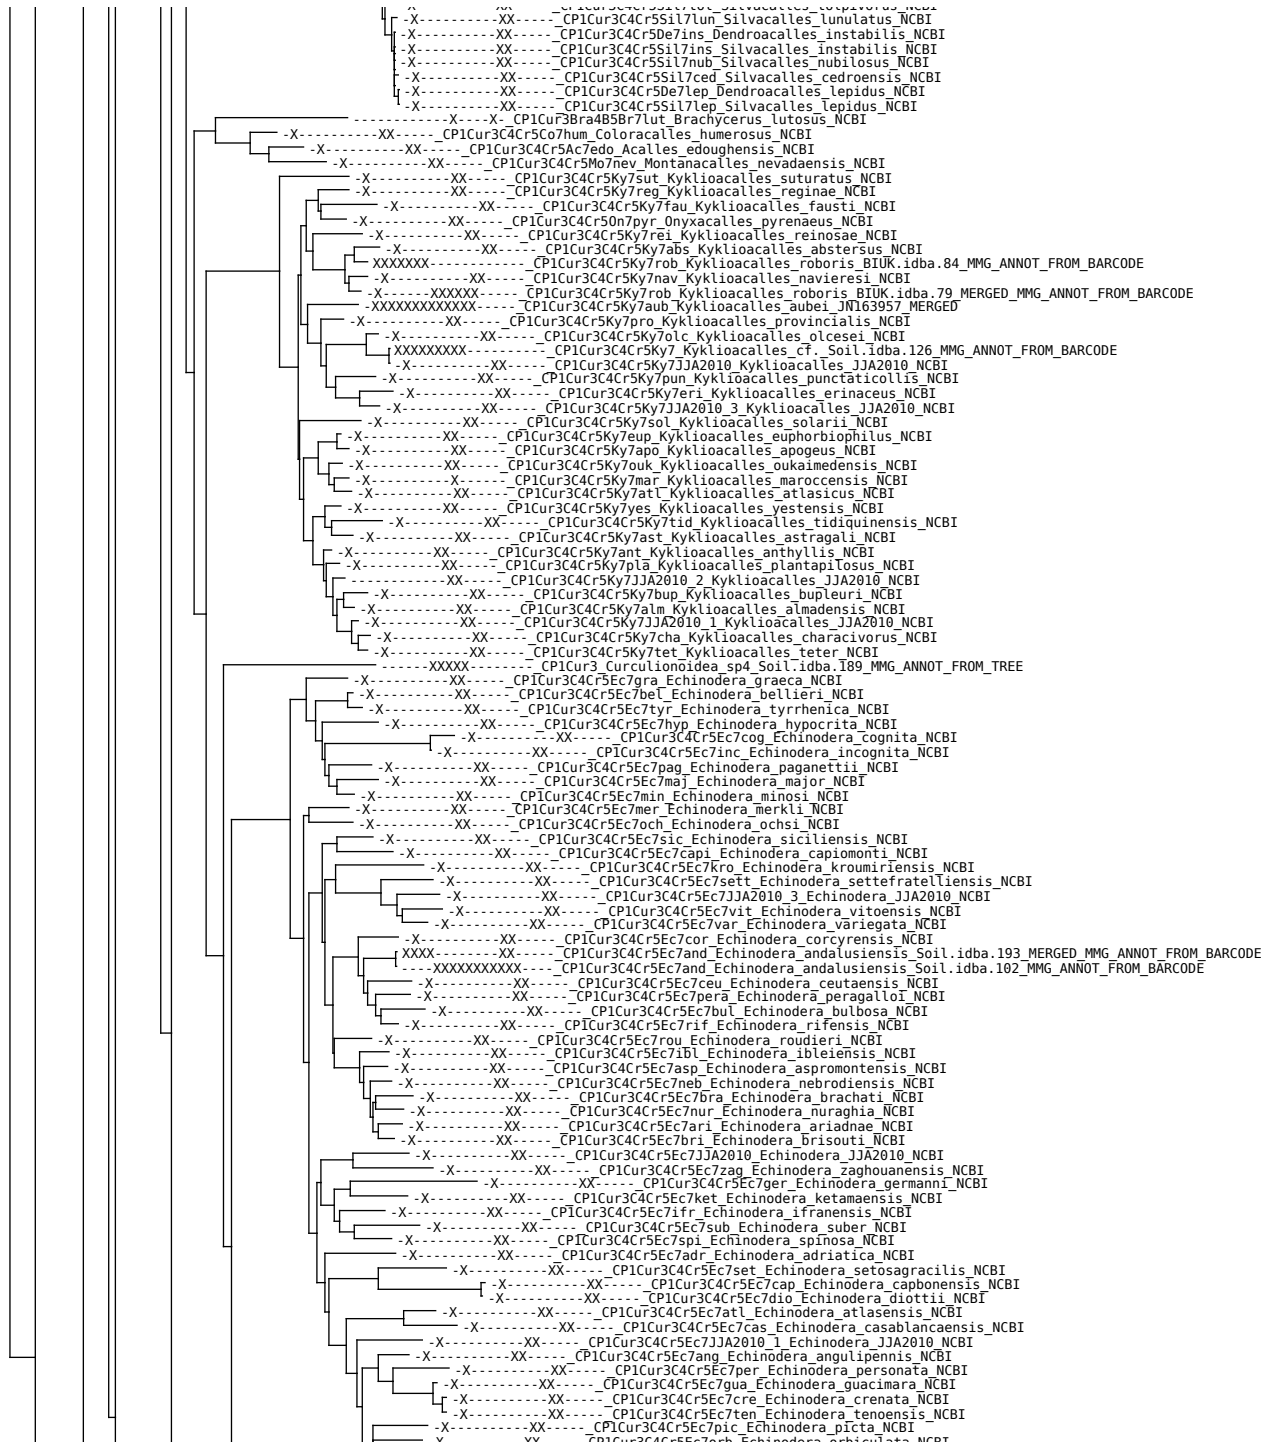

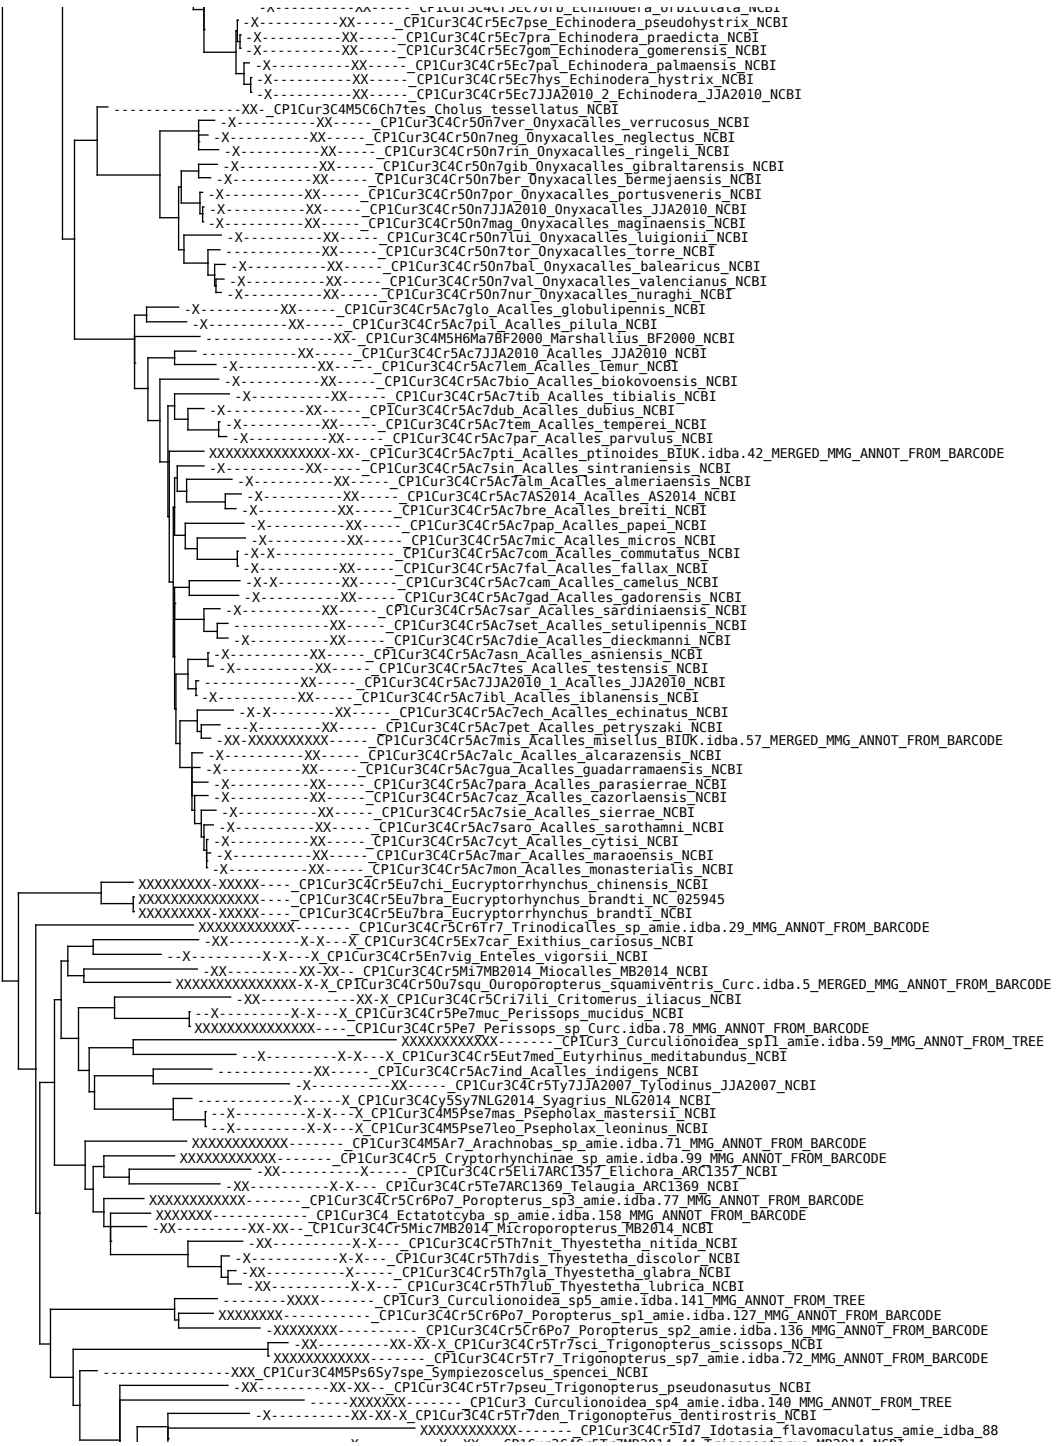

-X-----X--XX-- LP1Cur34Cr5Tr7MB2014\_44 Trigonopterus\_MB2014\_NCBI  
 XXXXXXXXXXXXXXXX-----CP1Cur34Cr5Tr7 Trigonopterus\_sp2\_amei.idba.35 MMG\_ANNOT\_FROM\_BARCODE  
 XXXXXXXXXXXXXXXX-----CP1Cur34Cr5Tr7 Trigonopterus\_sp9\_amei.idba.84 MMG\_ANNOT\_FROM\_BARCODE  
 -XX-----XX-XX--CP1Cur34Cr5Tr7MB2014\_39 Trigonopterus\_MB2014\_NCBI  
 -XX-----X--X--CP1Cur34Cr5Tr7MB2014\_40 Trigonopterus\_MB2014\_NCBI  
 XXXXXXXXXXXXXXXX-----CP1Cur34Cr5Tr7 Trigonopterus\_sp3\_amei.idba.37 MMG\_ANNOT\_FROM\_BARCODE  
 XXXXXXXXXXXXXXXX-----CP1Cur34Cr5Tr7 Trigonopterus\_sp4\_amei.idba.46 MMG\_ANNOT\_FROM\_BARCODE  
 -XX-----XX--CP1Cur34Cr5Tr7MB2014\_42 Trigonopterus\_MB2014\_NCBI  
 XXXXXXXXXXXXXXXX-----CP1Cur34Cr5Tr7 Trigonopterus\_sp1\_amei.idba.17 MMG\_ANNOT\_FROM\_BARCODE  
 -X-----XX-X--CP1Cur34Cr5Tr7MB2014\_45 Trigonopterus\_MB2014\_NCBI  
 -XX-----XX-XX-X CP1Cur34Cr5Tr7MB2011\_45 Trigonopterus\_MB2011\_NCBI  
 -X-----XX-XX--CP1Cur34Cr5Tr7 Trigonopterus\_dromedarius\_NCBI  
 XXXXXXXXXXXXXXXX-----CP1Cur34Cr5Tr7 Trigonopterus\_sp6\_amei.idba.51 MMG\_ANNOT\_FROM\_BARCODE  
 XXXXXXXXXXXXXXXX-----CP1Cur34Cr5Tr7 Trigonopterus\_sp8\_amei.idba.81 MMG\_ANNOT\_FROM\_BARCODE  
 -XX-----XX-XX-X CP1Cur34Cr5Tr7MB2011\_139 Trigonopterus\_MB2011\_NCBI  
 XXXXXXXXXXXXXXXX-----CP1Cur34Cr5Tr7 Trigonopterus\_sp5\_amei.idba.49 MMG\_ANNOT\_FROM\_BARCODE  
 -XX-----XX-X-X CP1Cur34Cr5Tr7dur Trigonopterus\_durus\_NCBI  
 -X-----XX-XX--CP1Cur34Cr5Tr7MB2014\_32 Trigonopterus\_MB2014\_NCBI  
 -XX-----XX-XX--CP1Cur34Cr5Tr7MB2011\_171 Trigonopterus\_MB2011\_NCBI  
 -X-----X-----CP1Cur34Cr5Tr7vel Trigonopterus\_velaris\_NCBI  
 -XX-----XX-X--CP1Cur34Cr5Tr7MB2011\_58 Trigonopterus\_MB2011\_NCBI  
 -X-----XX-XX-X CP1Cur34Cr5Tr7line Trigonopterus\_lineatus\_NCBI  
 -XX-----XX--CP1Cur34Cr5Tr7sul Trigonopterus\_sulcatus\_NCBI  
 -XX-----XX-XX-X CP1Cur34Cr5Tr7van Trigonopterus\_vandekampi\_NCBI  
 -XX-----XX-----X CP1Cur34Cr5Tr7dis Trigonopterus\_discoidalis\_NCBI  
 -XX-----XX-X-X CP1Cur34Cr5Tr7MB2011\_154 Trigonopterus\_MB2011\_NCBI  
 -XX-----XX-XX--CP1Cur34Cr5Tr7sch Trigonopterus\_scharfi\_NCBI  
 -XX-----XX-X--CP1Cur34Cr5Tr7MB2014\_50 Trigonopterus\_MB2014\_NCBI  
 -XX-----XX-XX-X CP1Cur34Cr5Tr7zyg Trigonopterus\_zygops\_NCBI  
 -XX-----XX-XX-X CP1Cur34Cr5Tr7ere Trigonopterus\_ereimitus\_NCBI  
 -X-----X-----CP1Cur34Cr5Tr7MB2011\_3 Trigonopterus\_MB2011\_NCBI  
 -XX-----XX-XX-X CP1Cur34Cr5Tr7MB2011\_1 Trigonopterus\_MB2011\_NCBI  
 -X-----X-----CP1Cur34Cr5Tr7MB2011\_4 Trigonopterus\_MB2011\_NCBI  
 -X-----X-----CP1Cur34Cr5Tr7MB2011\_5 Trigonopterus\_MB2011\_NCBI  
 -X-----X-----CP1Cur34Cr5Tr7MB2011\_2 Trigonopterus\_MB2011\_NCBI  
 -X-----X-----X-----CP1Cur34Cr5Tr7gra Trigonopterus\_granum\_NCBI  
 -X-----XX-XX-X CP1Cur34Cr5Tr7lin Trigonopterus\_lineellus\_NCBI  
 -XX-----XX-XX-X CP1Cur34Cr5Tr7MB2014\_37 Trigonopterus\_MB2014\_NCBI  
 -XX-----XX-XX-X CP1Cur34Cr5Tr7f7er Trigonopterus\_ferrugineus\_NCBI  
 -XX-----XX-X CP1Cur34Cr5Tr7rhi Trigonopterus\_rhinoceros\_NCBI  
 -XX-----XX-XX-X CP1Cur34Cr5Tr7kur Trigonopterus\_kurulu\_NCBI  
 -X-----XX-XX-X CP1Cur34Cr5Tr7MB2011\_20 Trigonopterus\_MB2011\_NCBI  
 -XX-----XX-X CP1Cur34Cr5Tr7tr1 Trigonopterus\_tridentatus\_NCBI  
 -XX-----XX-X CP1Cur34Cr5Tr7tib Trigonopterus\_tibialis\_NCBI  
 -XX-----XX-X CP1Cur34Cr5Tr7MB2014\_51 Trigonopterus\_MB2014\_NCBI  
 -XX-----XX-XX-X CP1Cur34Cr5Tr7MB2011\_118 Trigonopterus\_MB2011\_NCBI  
 -XX-----XX-X-X CP1Cur34Cr5Tr7inf Trigonopterus\_inflatus\_NCBI  
 -XX-----X-XX-X CP1Cur34Cr5Tr7aene Trigonopterus\_aeneipennis\_NCBI  
 -XX-----XX-X--CP1Cur34Cr5Tr7MB2014\_43 Trigonopterus\_MB2014\_NCBI  
 -XX-----XX-XX--CP1Cur34Cr5Tr7MB2014\_38 Trigonopterus\_MB2014\_NCBI  
 -XX-----XX-XX--CP1Cur34Cr5Tr7MB2014\_22 Trigonopterus\_MB2014\_NCBI  
 -XX-----XX-XX--CP1Cur34Cr5Tr7MB2014\_53 Trigonopterus\_MB2014\_NCBI  
 -XX-----XX-XX--CP1Cur34Cr5Tr7MB2014\_21 Trigonopterus\_MB2014\_NCBI  
 -XX-----XX-XX--CP1Cur34Cr5Tr7MB2014\_16 Trigonopterus\_MB2014\_NCBI  
 -XX-----XX-X--CP1Cur34Cr5Tr7MB2014\_14 Trigonopterus\_MB2014\_NCBI  
 -XX-----XX-XX--CP1Cur34Cr5Tr7MB2014\_26 Trigonopterus\_MB2014\_NCBI  
 -XX-----XX-X--CP1Cur34Cr5Tr7MB2014\_28 Trigonopterus\_MB2014\_NCBI  
 -XX-----XX-X--CP1Cur34Cr5Tr7MB2014\_23 Trigonopterus\_MB2014\_NCBI  
 -XX-----XX-X--CP1Cur34Cr5Tr7MB2014\_52 Trigonopterus\_MB2014\_NCBI  
 -XX-----XX-XX--CP1Cur34Cr5Tr7MB2014\_41 Trigonopterus\_MB2014\_NCBI  
 -XX-----XX-XX--CP1Cur34Cr5Tr7MB2014\_24 Trigonopterus\_MB2014\_NCBI  
 -XX-----XX-X-X CP1Cur34Cr5Tr7MB2014\_20 Trigonopterus\_MB2014\_NCBI  
 -X-----XX-X--CP1Cur34Cr5Tr7MB2014\_49 Trigonopterus\_MB2014\_NCBI  
 -XX-----XX-X--CP1Cur34Cr5Tr7MB2014\_19 Trigonopterus\_MB2014\_NCBI  
 -XX-----XX--CP1Cur34Cr5Tr7MB2014\_18 Trigonopterus\_MB2014\_NCBI  
 -XX-----XX-X--CP1Cur34Cr5Tr7MB2014\_47 Trigonopterus\_MB2014\_NCBI  
 -XX-----XX-XX-X CP1Cur34Cr5Tr7MB2014\_17 Trigonopterus\_MB2014\_NCBI  
 -XX-----XX-X--CP1Cur34Cr5Tr7MB2014\_46 Trigonopterus\_MB2014\_NCBI  
 -XX-----X-X--CP1Cur34Cr5Tr7MB2014\_48 Trigonopterus\_MB2014\_NCBI  
 -XX-----XX-XX--CP1Cur34Cr5Tr7MB2014\_33 Trigonopterus\_MB2014\_NCBI  
 -XX-----XX-XX--CP1Cur34Cr5Tr7MB2014\_31 Trigonopterus\_MB2014\_NCBI  
 -X-----XX-X--CP1Cur34Cr5Tr7MB2014\_9 Trigonopterus\_MB2014\_NCBI  
 -XX-----XX-X--CP1Cur34Cr5Tr7MB2014\_10 Trigonopterus\_MB2014\_NCBI  
 -XX-----XX-XX--CP1Cur34Cr5Tr7MB2014\_12 Trigonopterus\_MB2014\_NCBI  
 -XX-----XX-XX--CP1Cur34Cr5Tr7MB2014\_15 Trigonopterus\_MB2014\_NCBI  
 -XX-----XX-XX--CP1Cur34Cr5Tr7MB2014\_27 Trigonopterus\_MB2014\_NCBI  
 -X-----X-X CP1Cur34Cr5Tr7MB2014 Trigonopterus\_MB2014\_NCBI  
 -XX-----XX-XX--CP1Cur34Cr5Tr7MB2014\_36 Trigonopterus\_MB2014\_NCBI  
 -XX-----XX-XX--CP1Cur34Cr5Tr7MB2014\_2 Trigonopterus\_MB2014\_NCBI  
 -XX-----XX-XX--CP1Cur34Cr5Tr7MB2014\_1 Trigonopterus\_MB2014\_NCBI  
 -XX-----XX-XX--CP1Cur34Cr5Tr7MB2014\_13 Trigonopterus\_MB2014\_NCBI  
 -XX-----XX-X-X CP1Cur34Cr5Tr7MB2014\_25 Trigonopterus\_MB2014\_NCBI  
 -XX-----XX-XX--CP1Cur34Cr5Tr7MB2014\_7 Trigonopterus\_MB2014\_NCBI  
 -XX-----XX-XX--CP1Cur34Cr5Tr7MB2014\_3 Trigonopterus\_MB2014\_NCBI  
 -XX-----XX-XX-X CP1Cur34Cr5Tr7MB2014\_11 Trigonopterus\_MB2014\_NCBI  
 -XX-----XX-XX--CP1Cur34Cr5Tr7MB2014\_6 Trigonopterus\_MB2014\_NCBI  
 -X-----XX-XX--CP1Cur34Cr5Tr7MB2014\_5 Trigonopterus\_MB2014\_NCBI  
 -X-----X-----CP1Cur34Cr5Tr7MB2014\_35 Trigonopterus\_MB2014\_NCBI  
 -XX-----XX-X--CP1Cur34Cr5Tr7MB2014\_34 Trigonopterus\_MB2014\_NCBI  
 -XX-----XX-X--CP1Cur34Cr5Tr7MB2014\_8 Trigonopterus\_MB2014\_NCBI  
 -XX-----XX-XX--CP1Cur34Cr5Tr7MB2014\_4 Trigonopterus\_MB2014\_NCBI  
 XXXXXXXXXXXXXXXX-----CP1Cur34M5 Molytinae\_sp2\_Curc.idba.76 MMG\_ANNOT\_FROM\_BARCODE  
 XXXXXXXXXXXXXXXX-----CP1Cur34M5Li6Se7 Seleuca\_sp\_amei.idba.25 MMG\_ANNOT\_FROM\_BARCODE  
 -X-----X-----CP1Cur34AS5Micr7BHJ2011 Microborus\_BHJ2011\_NCBI  
 -X-----X-----CP1Cur34B5BHJ2011\_2 Baridinae\_BHJ2011\_NCBI  
 XXXXXXXXXXXXXXXX-----CP1Cur34B5 LobotracheLtn1\_sp1\_Curc.idba.68 MMG\_ANNOT\_FROM\_BARCODE  
 -X-----X-----CP1Cur34B5 Curcilonidea\_sp1\_B480tru.idba.122 MMG\_ANNOT\_FROM\_TREE  
 -X-----X-----CP1Cur34B5BHJ2011\_1 Baridinae\_BHJ2011\_NCBI  
 -X-----X-----CP1Cur34B5Ho7BHJ2011 Homoeometamelus\_BHJ2011\_NCBI  
 -XXXXXXXX-----CP1Cur34Cr5 Cryptorhynchinae\_sp8\_B480tru.idba.138 MMG\_ANNOT\_FROM\_BARCODE

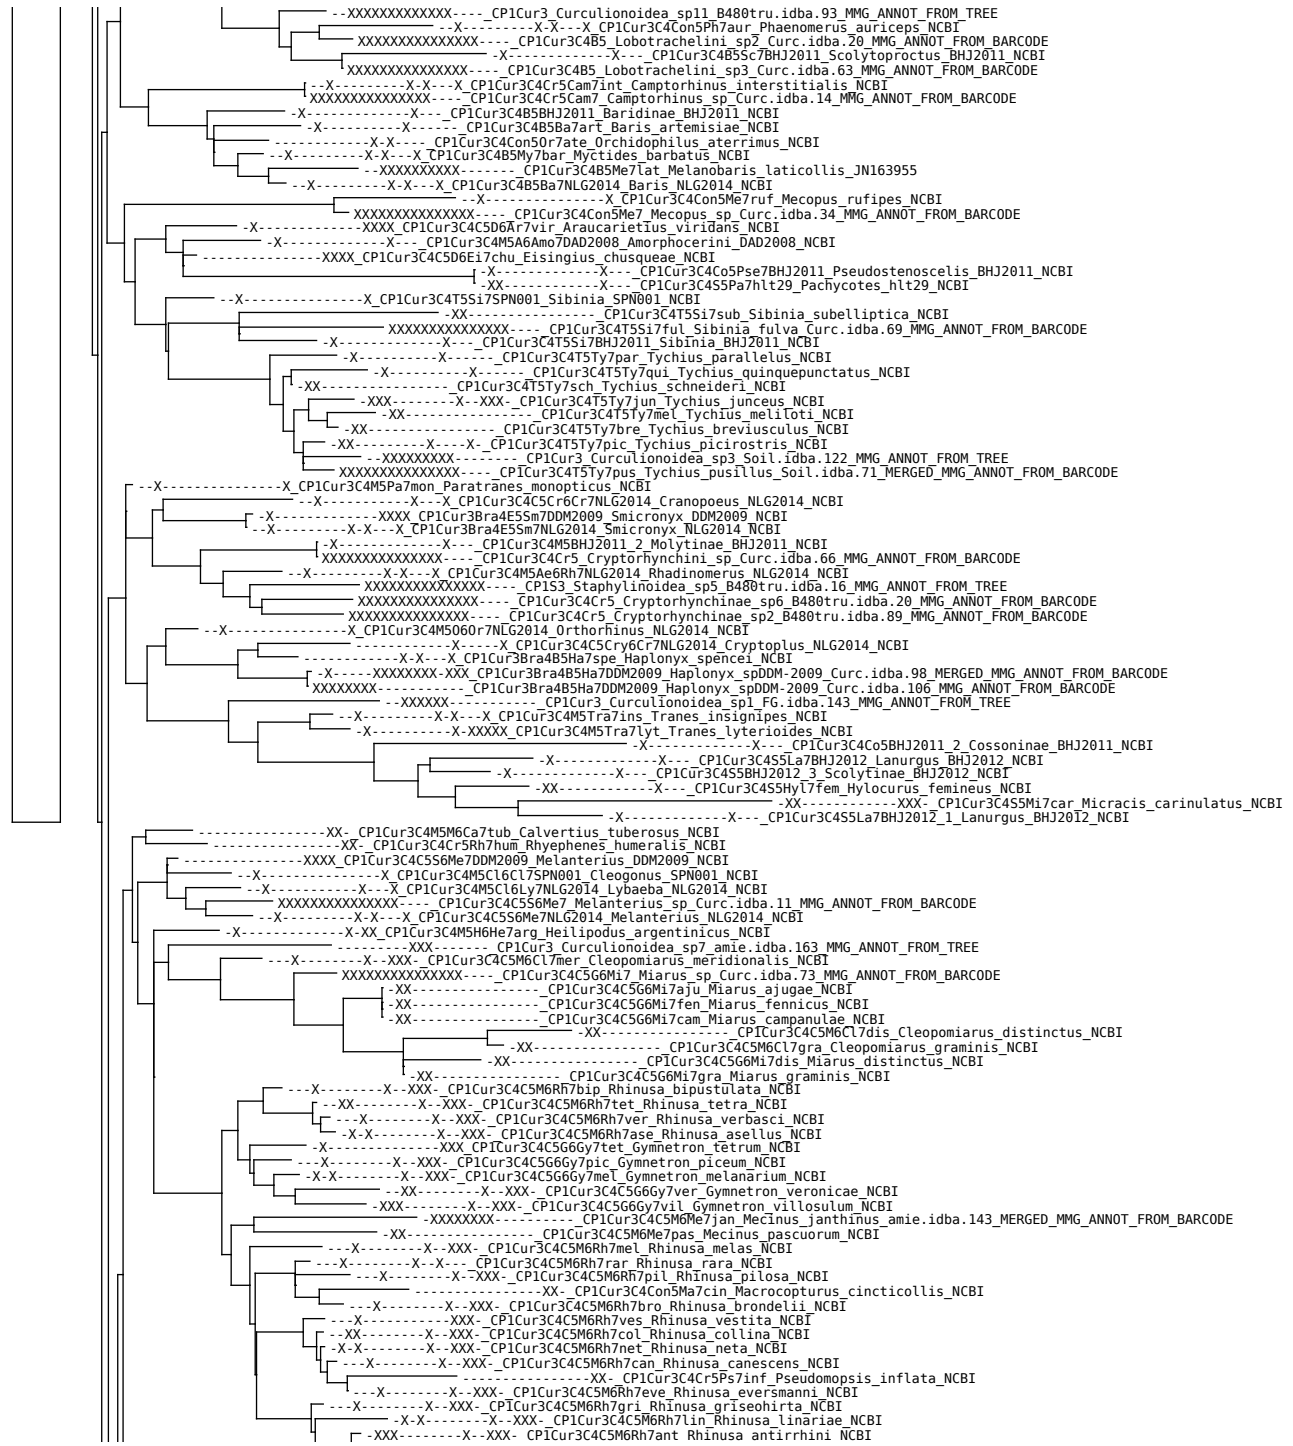

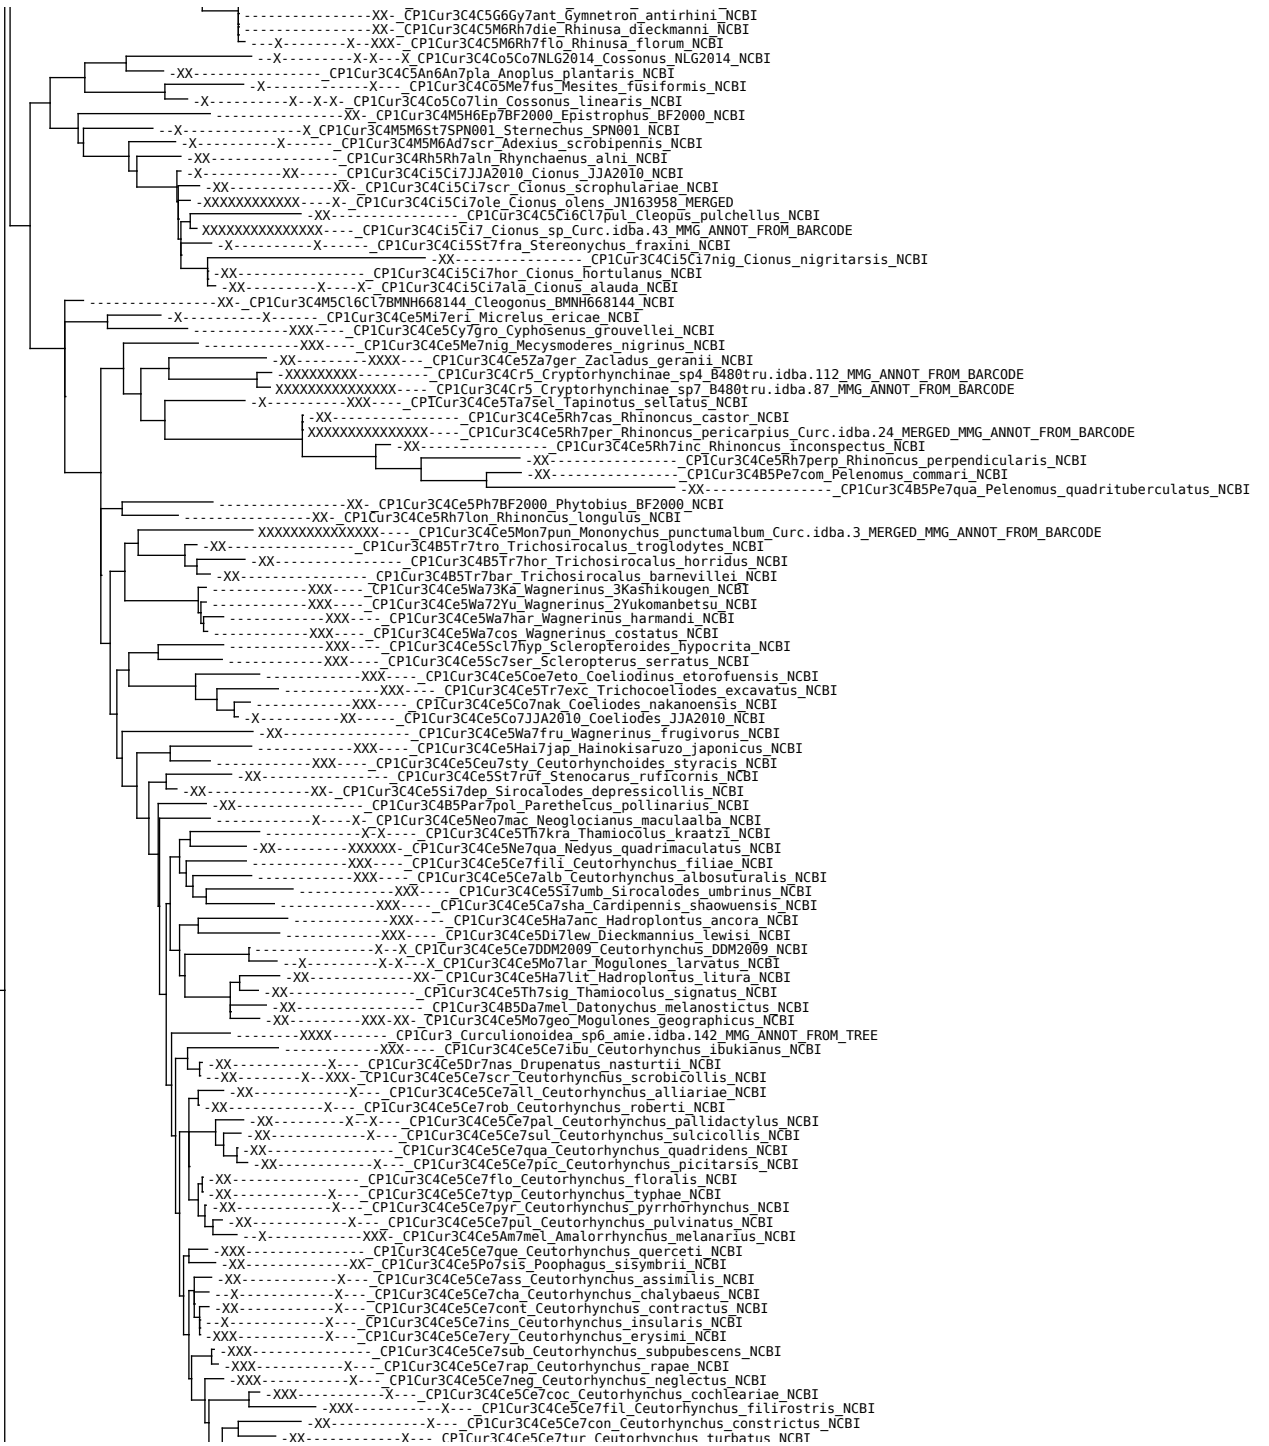

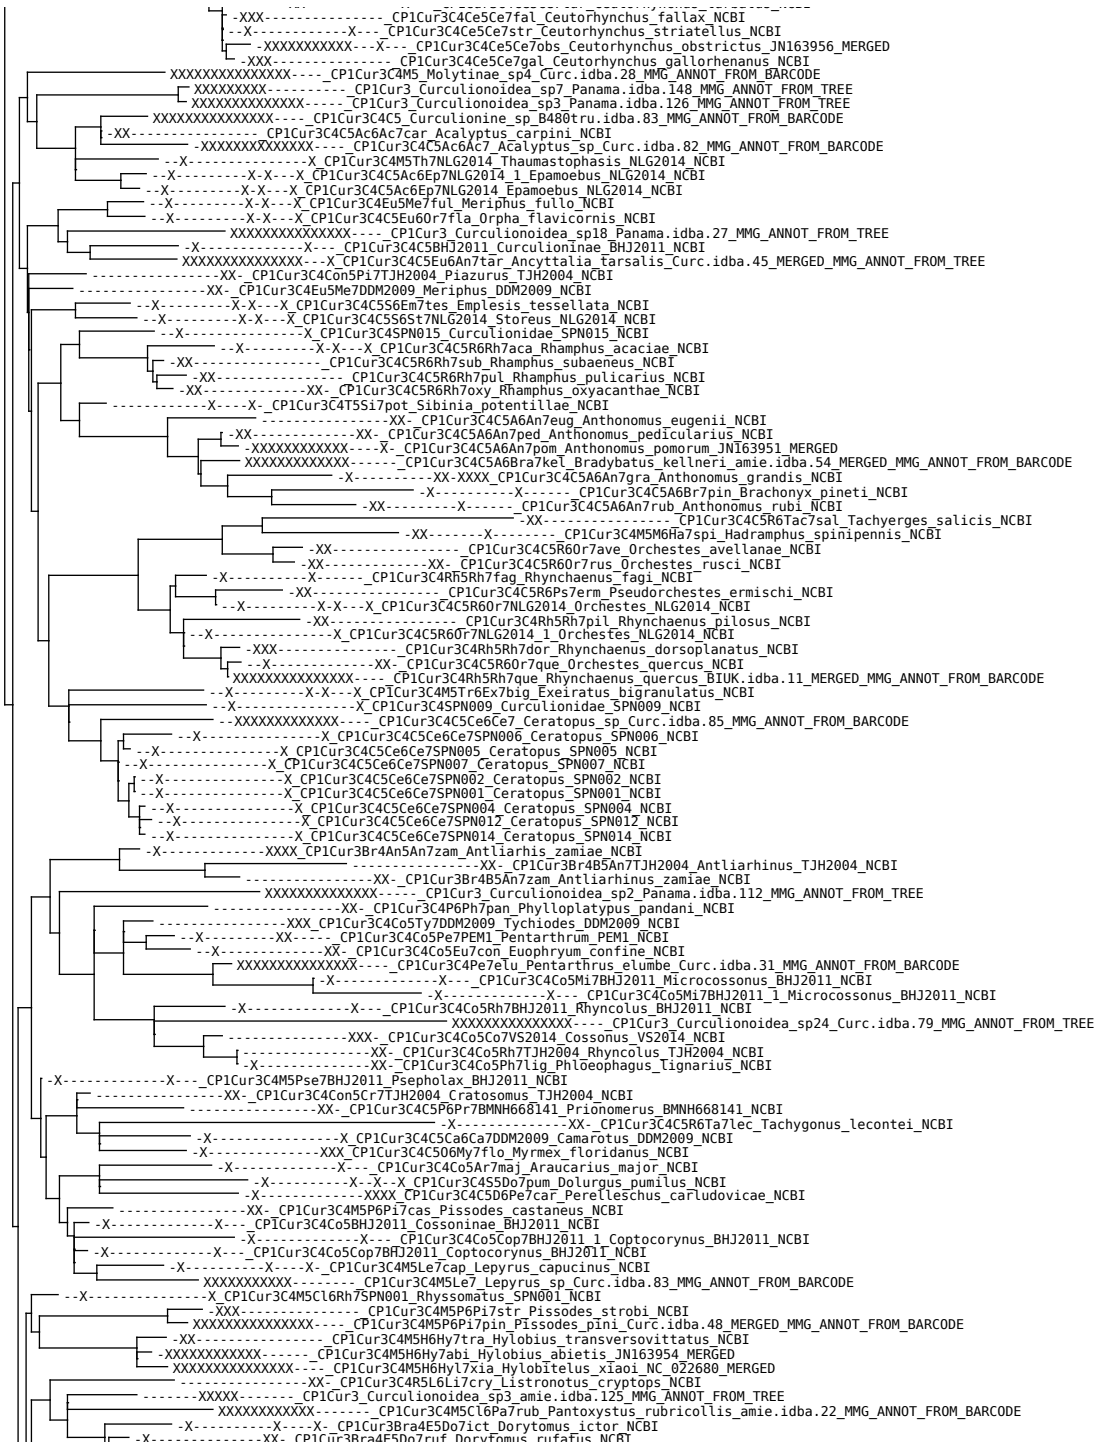



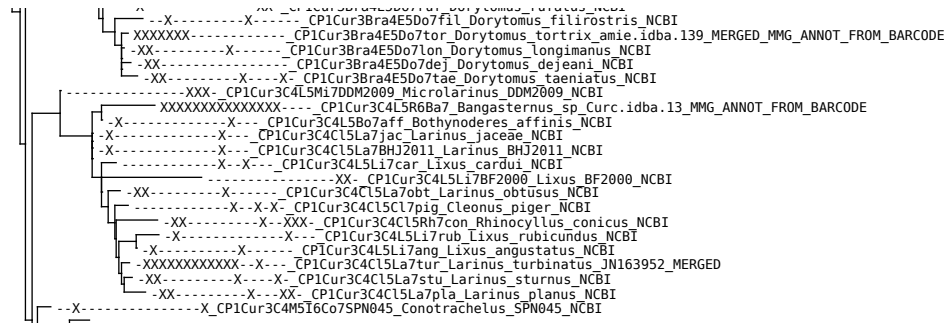

Supplement: Supplementary file [file 280792-2.pdf]
